# Supplementary material for: Understanding Rice-Magnaporthe Oryzae Interaction in Resistant and Susceptible Cultivars of Rice under Panicle Blast Infection Using a Time-Course Transcriptome Analysis
Source: Genes (Basel). 2021 Feb 20;12(2):301. doi: 10.3390/genes12020301 (PMC7924189; doi:10.3390/genes12020301)
Supplement: Supplementary file 1 [file genes-12-00301-s001.zip › Supplementary Table S4.xlsx]

## Sheet: DEG_Count
Data	Total No.of Genes	Down Regulated	Up Regulated	Total
HCvs48	60258	820	610	1430
HCvs72	60258	971	1056	2027
HCvs96	60258	924	1170	2094
TCvs48	60258	717	659	1376
TCvs72	60258	485	588	1073
TCvs96	60258	314	1019	1333

## Sheet: HCvs48
test_id	gene_id	gene	Annotation	log2(fold_change)	Regulation	locus	sample_1	sample_2	status	value_1	value_2	test_stat	p_value	q_value	significant
XLOC_038241	XLOC_038241	LOC_Os05g33150	CHIT6 - Chitinase family protein precursor, expressed	-10.47	Down Regulated	Chr5:19445897-19447492	HCR1	H48	OK	7432.32	5.24006	-6.20986	0.0004	0.020991	yes
XLOC_020530	XLOC_020530	LOC_Os02g24430	expressed protein	-8.64428	Down Regulated	Chr2:14161317-14171782	HCR1	H48	OK	139.35	0.348274	-5.96486	0.00515	0.0974333	no
XLOC_041414	XLOC_041414	LOC_Os05g51900	expressed protein	-8.12637	Down Regulated	Chr5:29785140-29785732	HCR1	H48	OK	239.499	0.85708	-4.68568	0.0028	0.0653184	no
XLOC_032212	XLOC_032212	LOC_Os04g26230	pollen allergen, putative, expressed	-7.67335	Down Regulated	Chr4:15292546-15293235	HCR1	H48	OK	756.689	3.70688	-5.51613	0.00975	0.142997	no
XLOC_048217	XLOC_048217	LOC_Os07g34130	TBC domain containing protein, expressed	-7.54401	Down Regulated	Chr7:20410550-20418589	HCR1	H48	OK	104.778	0.561434	-5.34735	0.00965	0.1421	no
XLOC_017223	XLOC_017223	LOC_Os12g44350	actin, putative, expressed	-7.42166	Down Regulated	Chr12:27491773-27493448	HCR1	H48	OK	324.841	1.89465	-7.25639	0.0005	0.0238029	yes		Row Labels	Count of Regulation
XLOC_006402	XLOC_006402	LOC_Os01g69020	retrotransposon protein, putative, unclassified, expressed	-7.40233	Down Regulated	Chr1:40097653-40099028	HCR1	H48	OK	912.29	5.39274	-6.39302	5e-05	0.00429853	yes		Down Regulated	820
XLOC_019220	XLOC_019220	LOC_Os12g43700	SCP-like extracellular protein, expressed	-7.33785	Down Regulated	Chr12:27145813-27147651	HCR1	H48	OK	203.446	1.25758	-5.47125	0.0062	0.104273	no		Up Regulated	610
XLOC_019574	XLOC_019574	LOC_Os02g03510	fibroin heavy chain precursor, putative, expressed	-7.22047	Down Regulated	Chr2:1427397-1428132	HCR1	H48	OK	351.385	2.35616	-4.71177	0.0099	0.144616	no		Grand Total	1430
XLOC_000543	XLOC_000543	LOC_Os01g12680	C4-dicarboxylate transporter/malic acid transport protein, expressed	-7.03537	Down Regulated	Chr1:6987900-6994006	HCR1	H48	OK	82.6484	0.630055	-4.92445	0.00065	0.0282221	yes
XLOC_056770	XLOC_056770	LOC_Os09g22000	hydrolase, HAD superfamily, Cof family, putative, expressed	-6.99976	Down Regulated	Chr9:13319714-13325707	HCR1	H48	OK	374.202	2.92395	-5.87505	0.00095	0.0318081	yes
XLOC_053151	XLOC_053151	LOC_Os08g38170	methyladenine glycosylase, putative, expressed	-6.89487	Down Regulated	Chr8:24186669-24189469	HCR1	H48	OK	32.3596	0.27192	-4.26999	0.0054	0.099416	no
XLOC_025426	XLOC_025426	LOC_Os03g05770	peroxidase precursor, putative, expressed	-6.88465	Down Regulated	Chr3:2878827-2880890	HCR1	H48	OK	250.1	2.11655	-4.47148	0.0073	0.116042	no
XLOC_021736	XLOC_021736	LOC_Os02g50150	caleosin related protein, putative, expressed	-6.84594	Down Regulated	Chr2:30636006-30639137	HCR1	H48	OK	114.829	0.998201	-4.37277	0.00525	0.0988773	no
XLOC_032945	XLOC_032945	LOC_Os04g42210	GPI-anchored protein, putative, expressed	-6.8249	Down Regulated	Chr4:24973155-24974134	HCR1	H48	OK	232.103	2.0473	-6.11334	0.00625	0.104572	no
XLOC_021769	XLOC_021769	LOC_Os02g50770	peroxidase precursor, putative, expressed	-6.79926	Down Regulated	Chr2:30999746-31001765	HCR1	H48	OK	277.293	2.48977	-6.08051	0.0002	0.0124383	yes
XLOC_002716	XLOC_002716	LOC_Os01g60080	monocopper oxidase, putative, expressed	-6.79188	Down Regulated	Chr1:34746851-34749514	HCR1	H48	OK	342.747	3.09324	-6.41038	5e-05	0.00429853	yes
XLOC_028740	XLOC_028740	LOC_Os03g16900	rab GDP dissociation inhibitor alpha, putative, expressed	-6.77288	Down Regulated	Chr3:9392252-9395747	HCR1	H48	OK	100.304	0.91723	-6.01258	0.0004	0.020991	yes
XLOC_008045	XLOC_008045	LOC_Os10g27480	expressed protein	-6.7501	Down Regulated	Chr10:14493298-14496794	HCR1	H48	OK	212.59	1.97497	-6.08005	5e-05	0.00429853	yes
XLOC_034882	XLOC_034882	LOC_Os04g25190	pollen allergen, putative, expressed	-6.73597	Down Regulated	Chr4:14558919-14559618	HCR1	H48	OK	531.811	4.98918	-5.71865	0.00795	0.122304	no
XLOC_057553	XLOC_057553	LOC_Os09g01134	expressed protein	-6.62231	Down Regulated	Chr9:143890-146112	HCR1	H48	OK	90.5775	0.919406	-4.01705	0.0059	0.100091	no
XLOC_013786	XLOC_013786	LOC_Os11g20384	SacI homology domain containing protein, expressed	-6.57528	Down Regulated	Chr11:11786135-11801820	HCR1	H48	OK	26.6439	0.27941	-4.56352	0.00905	0.135379	no
XLOC_052942	XLOC_052942	LOC_Os08g33860	zinc finger, C3HC4 type, putative, expressed	-6.52378	Down Regulated	Chr8:21194858-21200130	HCR1	H48	OK	94.7736	1.02999	-4.54023	0.0098	0.143442	no
XLOC_014884	XLOC_014884	LOC_Os11g45730	pectinesterase, putative, expressed	-6.47184	Down Regulated	Chr11:27660455-27662609	HCR1	H48	OK	389.758	4.39115	-5.89897	0.0001	0.00743766	yes
XLOC_000581	XLOC_000581	LOC_Os01g13440	pollen allergen Cyn d 23, putative, expressed	-6.3811	Down Regulated	Chr1:7484909-7485733	HCR1	H48	OK	179.084	2.14859	-4.32702	0.0086	0.130518	no
XLOC_013591	XLOC_013591	LOC_Os11g16350	expressed protein	-6.24984	Down Regulated	Chr11:9022054-9023348	HCR1	H48	OK	135.001	1.77397	-4.28383	0.00925	0.137387	no
XLOC_020935	XLOC_020935	LOC_Os02g32740	SNARE domain containing protein, putative, expressed	-6.24299	Down Regulated	Chr2:19444034-19446419	HCR1	H48	OK	201.912	2.66585	-4.32472	0.00905	0.135379	no
XLOC_053693	XLOC_053693	LOC_Os08g04650	pectinesterase inhibitor domain containing protein, expressed	-6.13842	Down Regulated	Chr8:2322525-2323638	HCR1	H48	OK	107.46	1.52545	-5.29576	0.0081	0.124155	no
XLOC_046113	XLOC_046113	LOC_Os06g45150	pollen allergen, putative, expressed	-6.11876	Down Regulated	Chr6:27303495-27304229	HCR1	H48	OK	135.306	1.9471	-4.9719	0.00825	0.125991	no
XLOC_018944	XLOC_018944	LOC_Os12g37660	pectinesterase, putative, expressed	-6.0787	Down Regulated	Chr12:23118800-23122701	HCR1	H48	OK	74.9809	1.10938	-4.60243	0.0065	0.107952	no
XLOC_048977	XLOC_048977	LOC_Os07g49100	pectinesterase, putative, expressed	-5.94809	Down Regulated	Chr7:29388040-29390114	HCR1	H48	OK	575.846	9.32722	-6.07153	5e-05	0.00429853	yes
XLOC_015510	XLOC_015510	LOC_Os12g07700	nifU, putative, expressed	-5.93332	Down Regulated	Chr12:3867719-3869856	HCR1	H48	OK	260.549	4.26366	-5.32141	0.0001	0.00743766	yes
XLOC_014859	XLOC_014859	LOC_Os11g45220	IWS1 homolog A, putative, expressed	-5.90388	Down Regulated	Chr11:27366724-27368303	HCR1	H48	OK	134.913	2.25324	-4.22551	0.0093	0.137849	no
XLOC_052792	XLOC_052792	LOC_Os08g31080	DUF260 domain containing protein, putative, expressed	-5.88845	Down Regulated	Chr8:19190789-19192399	HCR1	H48	OK	47.4463	0.800948	-4.26357	0.0075	0.117107	no
XLOC_051908	XLOC_051908	LOC_Os08g12600	expressed protein	-5.80838	Down Regulated	Chr8:7451362-7452401	HCR1	H48	OK	58.5547	1.04487	-4.29385	0.00795	0.122304	no
XLOC_025738	XLOC_025738	LOC_Os03g12520	STRUBBELIG-RECEPTOR FAMILY 7 precursor, putative, expressed	-5.71099	Down Regulated	Chr3:6626960-6630244	HCR1	H48	OK	119.74	2.28592	-5.20397	0.00025	0.0149744	yes
XLOC_002747	XLOC_002747	LOC_Os01g60770	expansin precursor, putative, expressed	-5.67885	Down Regulated	Chr1:35145515-35147338	HCR1	H48	OK	92.1927	1.79967	-4.99303	0.00095	0.0318081	yes
XLOC_023834	XLOC_023834	LOC_Os02g37580	fimbrin-like protein 2, putative, expressed	-5.62594	Down Regulated	Chr2:22666454-22671479	HCR1	H48	OK	23.8246	0.482447	-4.77834	0.00065	0.0282221	yes
XLOC_004363	XLOC_004363	LOC_Os01g21970	protein kinase, putative, expressed	-5.62446	Down Regulated	Chr1:12332794-12337227	HCR1	H48	OK	838.345	16.9938	-5.86873	5e-05	0.00429853	yes
XLOC_008263	XLOC_008263	LOC_Os10g32980	CESA7 - cellulose synthase, expressed	-5.62237	Down Regulated	Chr10:17261951-17266613	HCR1	H48	OK	78.379	1.5911	-4.76562	0.0002	0.0124383	yes
XLOC_053416	XLOC_053416	LOC_Os08g43570	beta-galactosidase precursor, putative, expressed	-5.60791	Down Regulated	Chr8:27560626-27565221	HCR1	H48	OK	98.4233	2.01813	-5.77845	0.0004	0.020991	yes
XLOC_044378	XLOC_044378	LOC_Os06g08380	1,3-beta-glucan synthase component domain containing protein, expressed	-5.54958	Down Regulated	Chr6:4066676-4084010	HCR1	H48	OK	13.6215	0.290826	-5.18726	0.00595	0.100764	no
XLOC_044374	XLOC_044374	LOC_Os06g08310	plasma membrane ATPase, putative, expressed	-5.5232	Down Regulated	Chr6:4025565-4030514	HCR1	H48	OK	291.516	6.33888	-5.97929	5e-05	0.00429853	yes
XLOC_006639	XLOC_006639	LOC_Os01g74480	cupin domain containing protein, expressed	-5.48681	Down Regulated	Chr1:43136223-43137723	HCR1	H48	OK	149.025	3.32327	-5.13237	0.0011	0.0352169	yes
XLOC_019460	XLOC_019460	LOC_Os02g01270	START domain containing protein, expressed	-5.4847	Down Regulated	Chr2:146491-152581	HCR1	H48	OK	23.4604	0.523935	-3.95034	0.0092	0.136853	no
XLOC_024432	XLOC_024432	LOC_Os02g49340	nitrate-induced NOI protein, putative, expressed	-5.46468	Down Regulated	Chr2:30154918-30156709	HCR1	H48	OK	195.293	4.42237	-4.34172	0.0065	0.107952	no
XLOC_040974	XLOC_040974	LOC_Os05g41270	CAMK_CAMK_like.4 - CAMK includes calcium/calmodulin depedent protein kinases, expressed	-5.4599	Down Regulated	Chr5:24175472-24178191	HCR1	H48	OK	58.0289	1.31841	-5.05758	0.00085	0.0291957	yes
XLOC_003046	XLOC_003046	LOC_Os01g66860	serine/threonine protein kinase, putative, expressed	-5.41202	Down Regulated	Chr1:38818685-38822182	HCR1	H48	OK	75.8639	1.78179	-4.43045	0.00845	0.128575	no
XLOC_028863	XLOC_028863	LOC_Os03g19610	pectinesterase, putative, expressed	-5.37209	Down Regulated	Chr3:11033521-11035542	HCR1	H48	OK	185.881	4.48824	-4.96534	0.00045	0.0222941	yes
XLOC_022492	XLOC_022492	LOC_Os02g07900	ANTH/ENTH domain containing protein, putative, expressed	-5.36825	Down Regulated	Chr2:4135896-4140415	HCR1	H48	OK	264.269	6.39797	-5.52716	0.00015	0.0100793	yes
XLOC_042857	XLOC_042857	LOC_Os06g27850	peroxidase precursor, putative, expressed	-5.35308	Down Regulated	Chr6:15776958-15778609	HCR1	H48	OK	174.886	4.27875	-4.99862	0.0009	0.0305186	yes
XLOC_046972	XLOC_046972	LOC_Os07g07420	gibberellin 20 oxidase 1-B, putative, expressed	-5.30848	Down Regulated	Chr7:3702286-3705030	HCR1	H48	OK	188.565	4.75827	-4.64431	0.00085	0.0291957	yes
XLOC_040008	XLOC_040008	LOC_Os05g20150	TKL_IRAK_CrRLK1L-1.11 - The CrRLK1L-1 subfamily has homology to the CrRLK1L homolog, expressed	-5.29818	Down Regulated	Chr5:11788696-11791869	HCR1	H48	OK	116.295	2.95562	-4.92129	0.00095	0.0318081	yes
XLOC_018084	XLOC_018084	LOC_Os12g18960	integral membrane protein DUF6 containing protein, expressed	-5.27973	Down Regulated	Chr12:10996699-11004373	HCR1	H48	OK	95.8868	2.46832	-4.66901	0.00025	0.0149744	yes
XLOC_010225	XLOC_010225	LOC_Os10g35930	OsPLIM2c - LIM domain protein, putative actin-binding protein and transcription factor, expressed	-5.26906	Down Regulated	Chr10:19198744-19206783	HCR1	H48	OK	619.502	16.0656	-5.30739	0.00035	0.0191224	yes
XLOC_010225	XLOC_010225	LOC_Os10g35940	folylpolyglutamate synthetase, putative, expressed	-5.26906	Down Regulated	Chr10:19198744-19206783	HCR1	H48	OK	619.502	16.0656	-5.30739	0.00035	0.0191224	yes
XLOC_007638	XLOC_007638	LOC_Os10g17660	profilin domain containing protein, expressed	-5.25609	Down Regulated	Chr10:8927903-8938317	HCR1	H48	OK	618.3	16.1793	-4.11557	0.0049	0.0937963	no
XLOC_008295	XLOC_008295	LOC_Os10g33650	CK1_CaseinKinase_1.9 - CK1 includes the casein kinase 1 kinases, expressed	-5.22108	Down Regulated	Chr10:17735915-17744567	HCR1	H48	OK	44.6576	1.19727	-5.14321	0.0041	0.080975	no
XLOC_032898	XLOC_032898	LOC_Os04g41250	armadillo/beta-catenin repeat family protein, putative, expressed	-5.20636	Down Regulated	Chr4:24471708-24479505	HCR1	H48	OK	121.078	3.27942	-5.4147	5e-05	0.00429853	yes
XLOC_013547	XLOC_013547	LOC_Os11g14900	thiol protease SEN102 precursor, putative, expressed	-5.20352	Down Regulated	Chr11:8379341-8382036	HCR1	H48	OK	371.339	10.0775	-5.23225	0.00015	0.0100793	yes
XLOC_051449	XLOC_051449	LOC_Os08g03180	retrotransposon protein, putative, unclassified, expressed	-5.18443	Down Regulated	Chr8:1468422-1473230	HCR1	H48	OK	11.234	0.308934	-4.06391	0.0098	0.143442	no
XLOC_044229	XLOC_044229	LOC_Os06g05209	pectate lyase precursor, putative, expressed	-5.1668	Down Regulated	Chr6:2336428-2338189	HCR1	H48	OK	156.406	4.35405	-4.72303	0.00075	0.0286569	yes
XLOC_037710	XLOC_037710	LOC_Os05g20570	invertase/pectin methylesterase inhibitor family protein, putative, expressed	-5.15767	Down Regulated	Chr5:12069504-12070565	HCR1	H48	OK	709.047	19.8638	-5.25286	5e-05	0.00429853	yes
XLOC_002127	XLOC_002127	LOC_Os01g48410	ATROPGEF7/ROPGEF7, putative, expressed	-5.1064	Down Regulated	Chr1:27742225-27745236	HCR1	H48	OK	327.442	9.50506	-5.2148	5e-05	0.00429853	yes
XLOC_056914	XLOC_056914	LOC_Os09g25490	CESA9 - cellulose synthase, expressed	-5.10493	Down Regulated	Chr9:15281267-15285910	HCR1	H48	OK	48.5362	1.41036	-4.20229	0.00085	0.0291957	yes
XLOC_054677	XLOC_054677	LOC_Os08g25710	CSLD3 - cellulose synthase-like family D, expressed	-5.09056	Down Regulated	Chr8:15642074-15645940	HCR1	H48	OK	64.8156	1.90225	-4.74967	0.00045	0.0222941	yes
XLOC_005287	XLOC_005287	LOC_Os01g44430	retrotransposon protein, putative, unclassified, expressed	-5.08985	Down Regulated	Chr1:25476443-25483026	HCR1	H48	OK	41.4894	1.21826	-5.2742	0.00015	0.0100793	yes
XLOC_040856	XLOC_040856	LOC_Os05g39000	KIP1, putative, expressed	-5.07101	Down Regulated	Chr5:22878684-22882073	HCR1	H48	OK	44.9667	1.33772	-5.50025	0.0001	0.00743766	yes
XLOC_015753	XLOC_015753	LOC_Os12g12860	CAMK_CAMK_like.46 - CAMK includes calcium/calmodulin depedent protein kinases, expressed	-5.07037	Down Regulated	Chr12:7112285-7116204	HCR1	H48	OK	203.663	6.06146	-5.42782	5e-05	0.00429853	yes
XLOC_033162	XLOC_033162	LOC_Os04g47150	OsSub43 - Putative Subtilisin homologue, expressed	-5.05949	Down Regulated	Chr4:27997140-28000036	HCR1	H48	OK	58.8856	1.76584	-4.6942	0.0008	0.0291957	yes
XLOC_054051	XLOC_054051	LOC_Os08g12160	expressed protein	-5.04541	Down Regulated	Chr8:7165388-7205848	HCR1	H48	OK	509.566	15.4306	-5.03735	0.0003	0.0170603	yes
XLOC_054051	XLOC_054051	LOC_Os08g12230	expressed protein	-5.04541	Down Regulated	Chr8:7165388-7205848	HCR1	H48	OK	509.566	15.4306	-5.03735	0.0003	0.0170603	yes
XLOC_043939	XLOC_043939	LOC_Os06g49860	methyltransferase, putative, expressed	-5.01393	Down Regulated	Chr6:30183273-30186939	HCR1	H48	OK	60.5976	1.87549	-4.71261	0.001	0.0329538	yes
XLOC_008608	XLOC_008608	LOC_Os10g40090	expansin precursor, putative, expressed	-5.0078	Down Regulated	Chr10:21465008-21466849	HCR1	H48	OK	1686.31	52.413	-4.82153	0.0003	0.0170603	yes
XLOC_011314	XLOC_011314	LOC_Os11g13860	cyclin-dependent kinase, putative, expressed	-4.97869	Down Regulated	Chr11:7643039-7649692	HCR1	H48	OK	39.7243	1.25986	-5.34351	0.00015	0.0100793	yes
XLOC_039039	XLOC_039039	LOC_Os05g50120	CGMC_MAPKCMGC_2.3 - CGMC includes CDA, MAPK, GSK3, and CLKC kinases, expressed	-4.957	Down Regulated	Chr5:28720636-28726522	HCR1	H48	OK	39.2743	1.26446	-4.96011	0.00055	0.0253173	yes
XLOC_007637	XLOC_007637	LOC_Os10g17650	Os10bglu34 - beta-glucosidase homologue, similar to Os3bglu6, expressed	-4.94014	Down Regulated	Chr10:8920260-8926172	HCR1	H48	OK	11.1668	0.363745	-2.94125	0.00885	0.133206	no
XLOC_022669	XLOC_022669	LOC_Os02g12300	pectate lyase precursor, putative, expressed	-4.92408	Down Regulated	Chr2:6399354-6402186	HCR1	H48	OK	150.754	4.96558	-4.7843	0.001	0.0329538	yes
XLOC_009802	XLOC_009802	LOC_Os10g25990	retrotransposon protein, putative, unclassified, expressed	-4.92098	Down Regulated	Chr10:13462545-13463732	HCR1	H48	OK	92.8696	3.06556	-4.41436	0.001	0.0329538	yes
XLOC_017242	XLOC_017242	LOC_Os12g01370	fatty acid desaturase, putative, expressed	-4.88931	Down Regulated	Chr12:226238-230189	HCR1	H48	OK	39.7559	1.34144	-4.49897	0.001	0.0329538	yes
XLOC_021911	XLOC_021911	LOC_Os02g53820	endoglucanase, putative, expressed	-4.86654	Down Regulated	Chr2:32961961-32964520	HCR1	H48	OK	108.267	3.71127	-4.68806	0.00345	0.0771319	no
XLOC_041685	XLOC_041685	LOC_Os06g02019	cytochrome P450, putative, expressed	-4.85867	Down Regulated	Chr6:580664-586450	HCR1	H48	OK	113.778	3.92151	-5.25349	0.0001	0.00743766	yes
XLOC_022544	XLOC_022544	LOC_Os02g09450	glycerophosphoryl diester phosphodiesterase family protein, putative, expressed	-4.84599	Down Regulated	Chr2:4847699-4852504	HCR1	H48	OK	125.252	4.35508	-5.28164	0.00025	0.0149744	yes
XLOC_033632	XLOC_033632	LOC_Os04g57350	EH domain-containing protein 1, putative, expressed	-4.83053	Down Regulated	Chr4:34138225-34142151	HCR1	H48	OK	277.696	9.7597	-4.92645	0.0002	0.0124383	yes
XLOC_041368	XLOC_041368	LOC_Os05g51090	nodulin MtN3 family protein, putative, expressed	-4.82461	Down Regulated	Chr5:29312986-29314868	HCR1	H48	OK	323.345	11.4108	-5.04874	0.0002	0.0124383	yes
XLOC_002077	XLOC_002077	LOC_Os01g47400	OsMan01 - Endo-Beta-Mannanase, expressed	-4.80776	Down Regulated	Chr1:27081473-27085681	HCR1	H48	OK	109.239	3.9003	-4.07667	0.00105	0.0341017	yes
XLOC_043358	XLOC_043358	LOC_Os06g38510	pectate lyase precursor, putative, expressed	-4.78535	Down Regulated	Chr6:22821002-22823478	HCR1	H48	OK	335.515	12.1669	-4.52876	0.0001	0.00743766	yes
XLOC_022549	XLOC_022549	LOC_Os02g09530	expressed protein	-4.77001	Down Regulated	Chr2:4908801-4911371	HCR1	H48	OK	92.7227	3.39835	-3.72458	0.0053	0.099416	no
XLOC_024668	XLOC_024668	LOC_Os02g53970	OsSub24 - Putative Subtilisin homologue, expressed	-4.76436	Down Regulated	Chr2:33045379-33048003	HCR1	H48	OK	40.6991	1.49751	-4.31327	0.0016	0.0444563	yes
XLOC_031983	XLOC_031983	LOC_Os04g21340	expressed protein	-4.76076	Down Regulated	Chr4:12045402-12048695	HCR1	H48	OK	243.129	8.9682	-5.18327	5e-05	0.00429853	yes
XLOC_004110	XLOC_004110	LOC_Os01g16030	ADP-ribosylation factor, putative, expressed	-4.75124	Down Regulated	Chr1:9019840-9024052	HCR1	H48	OK	21.8111	0.809865	-3.32061	0.00705	0.114421	no
XLOC_019515	XLOC_019515	LOC_Os02g02450	transposon protein, putative, unclassified, expressed	-4.73529	Down Regulated	Chr2:861820-865065	HCR1	H48	OK	563.804	21.1672	-4.92996	5e-05	0.00429853	yes
XLOC_006479	XLOC_006479	LOC_Os01g71040	expressed protein	-4.72374	Down Regulated	Chr1:41112003-41114858	HCR1	H48	OK	65.8329	2.49147	-4.82118	0.00115	0.0363793	yes
XLOC_041754	XLOC_041754	LOC_Os06g03390	expressed protein	-4.69098	Down Regulated	Chr6:1292192-1292906	HCR1	H48	OK	716.058	27.7218	-4.87688	0.00015	0.0100793	yes
XLOC_021463	XLOC_021463	LOC_Os02g44590	OsSub20 - Putative Subtilisin homologue, expressed	-4.68982	Down Regulated	Chr2:27018351-27021968	HCR1	H48	OK	18.4264	0.713946	-4.19904	0.00175	0.0480305	yes
XLOC_033526	XLOC_033526	LOC_Os04g55110	expressed protein	-4.68351	Down Regulated	Chr4:32769558-32772323	HCR1	H48	OK	123.64	4.81154	-4.45429	0.0015	0.0422399	yes
XLOC_058742	XLOC_058742	LOC_Os09g26360	pectinesterase, putative, expressed	-4.67572	Down Regulated	Chr9:15921627-15924070	HCR1	H48	OK	153.149	5.99214	-4.56368	0.00165	0.0456719	yes
XLOC_003869	XLOC_003869	LOC_Os01g10900	MRH1, putative, expressed	-4.65514	Down Regulated	Chr1:5814777-5819207	HCR1	H48	OK	57.5273	2.28317	-4.7359	0.0026	0.0617368	no
XLOC_038366	XLOC_038366	LOC_Os05g35690	GASR6 - Gibberellin-regulated GASA/GAST/Snakin family protein precursor, expressed	-4.63989	Down Regulated	Chr5:21198100-21198992	HCR1	H48	OK	67.2141	2.69597	-4.3485	0.0099	0.144616	no
XLOC_041841	XLOC_041841	LOC_Os06g05260	pectate lyase precursor, putative, expressed	-4.58228	Down Regulated	Chr6:2372991-2374946	HCR1	H48	OK	199.011	8.30757	-4.25434	0.00235	0.0571944	no
XLOC_044187	XLOC_044187	LOC_Os06g04450	Sec1 family transport protein, putative, expressed	-4.57898	Down Regulated	Chr6:1900861-1909223	HCR1	H48	OK	16.3917	0.685828	-3.7195	0.00825	0.125991	no
XLOC_002679	XLOC_002679	LOC_Os01g59360	CAMK_CAMK_like.10 - CAMK includes calcium/calmodulin depedent protein kinases, expressed	-4.57247	Down Regulated	Chr1:34325309-34328118	HCR1	H48	OK	361.048	15.1745	-4.84608	0.00035	0.0191224	yes
XLOC_027499	XLOC_027499	LOC_Os03g52870	WD-40 repeat family protein, putative, expressed	-4.5494	Down Regulated	Chr3:30319463-30321666	HCR1	H48	OK	92.1512	3.93546	-4.29411	0.0022	0.0561646	no
XLOC_013691	XLOC_013691	LOC_Os11g18366	cycloartenol synthase, putative, expressed	-4.54328	Down Regulated	Chr11:10352223-10376611	HCR1	H48	OK	21.2684	0.912162	-3.82585	0.00725	0.116042	no
XLOC_055292	XLOC_055292	LOC_Os08g38590	OsMADS62 - MADS-box family gene with MIKC* type-box, expressed	-4.54043	Down Regulated	Chr8:24391620-24393867	HCR1	H48	OK	24.359	1.04678	-2.79085	0.00915	0.136456	no
XLOC_038877	XLOC_038877	LOC_Os05g46530	invertase/pectin methylesterase inhibitor family protein, putative, expressed	-4.51895	Down Regulated	Chr5:26948389-26949834	HCR1	H48	OK	2156.21	94.0484	-4.23351	0.0002	0.0124383	yes
XLOC_039535	XLOC_039535	LOC_Os05g09440	NADP-dependent malic enzyme, chloroplast precursor, putative, expressed	-4.48971	Down Regulated	Chr5:5293554-5297419	HCR1	H48	OK	111.543	4.96483	-5.07164	5e-05	0.00429853	yes
XLOC_035434	XLOC_035434	LOC_Os04g38560	pectinesterase, putative, expressed	-4.47769	Down Regulated	Chr4:22910388-22912423	HCR1	H48	OK	511.726	22.9678	-4.62009	0.0003	0.0170603	yes
XLOC_001848	XLOC_001848	LOC_Os01g42520	expressed protein	-4.46022	Down Regulated	Chr1:24181110-24184171	HCR1	H48	OK	338.924	15.3972	-5.21781	5e-05	0.00429853	yes
XLOC_031295	XLOC_031295	LOC_Os04g05050	pectate lyase precursor, putative, expressed	-4.40962	Down Regulated	Chr4:2480434-2485914	HCR1	H48	OK	123.236	5.7984	-4.44692	0.0003	0.0170603	yes
XLOC_047821	XLOC_047821	LOC_Os07g26480	P21-Rho-binding domain containing protein, putative, expressed	-4.40874	Down Regulated	Chr7:15230840-15233283	HCR1	H48	OK	248.728	11.7102	-4.79756	5e-05	0.00429853	yes
XLOC_039094	XLOC_039094	LOC_Os05g51230	phosphatidylinositol 3- and 4-kinase family protein, putative, expressed	-4.4073	Down Regulated	Chr5:29382084-29385449	HCR1	H48	OK	161.635	7.61736	-4.90896	0.00015	0.0100793	yes
XLOC_024178	XLOC_024178	LOC_Os02g44470	actin-depolymerizing factor, putative, expressed	-4.40695	Down Regulated	Chr2:26919907-26924556	HCR1	H48	OK	246.027	11.5973	-4.10586	0.00025	0.0149744	yes
XLOC_024178	XLOC_024178	LOC_Os02g44480	pentatricopeptide, putative, expressed	-4.40695	Down Regulated	Chr2:26919907-26924556	HCR1	H48	OK	246.027	11.5973	-4.10586	0.00025	0.0149744	yes
XLOC_021993	XLOC_021993	LOC_Os02g55400	ATPase 8, plasma membrane-type, putative, expressed	-4.40022	Down Regulated	Chr2:33931550-33936180	HCR1	H48	OK	103.675	4.90994	-4.71508	0.001	0.0329538	yes
XLOC_028320	XLOC_028320	LOC_Os03g07600	calcium-binding protein, putative, expressed	-4.38294	Down Regulated	Chr3:3866509-3871477	HCR1	H48	OK	71.5329	3.42853	-4.77721	0.0005	0.0238029	yes
XLOC_048101	XLOC_048101	LOC_Os07g31830	GTPase activating protein, putative, expressed	-4.36835	Down Regulated	Chr7:18911786-18914891	HCR1	H48	OK	65.8868	3.19002	-4.03429	0.0031	0.0709577	no
XLOC_046993	XLOC_046993	LOC_Os07g07870	LTPL77 - Protease inhibitor/seed storage/LTP family protein precursor, putative, expressed	-4.36666	Down Regulated	Chr7:3950180-3951860	HCR1	H48	OK	18.1585	0.880207	-2.97616	0.009	0.134839	no
XLOC_057153	XLOC_057153	LOC_Os09g30030	expressed protein	-4.34742	Down Regulated	Chr9:18269123-18269793	HCR1	H48	OK	391.964	19.255	-4.05819	0.002	0.0521034	no
XLOC_019575	XLOC_019575	LOC_Os02g03520	THION25 - Plant thionin family protein precursor, expressed	-4.33535	Down Regulated	Chr2:1430324-1430872	HCR1	H48	OK	587.263	29.0913	-5.91369	0.00235	0.0571944	no
XLOC_062229	XLOC_062229	LOC_Os09g22090	mannose-6-phosphate isomerase, putative, expressed	-4.33378	Down Regulated	Chr9:13375557-13381517	HCR1	H48	OK	61.708	3.06016	-2.43147	0.0044	0.0856842	no
XLOC_046196	XLOC_046196	LOC_Os06g46560	myb-like DNA-binding domain containing protein, expressed	-4.29774	Down Regulated	Chr6:28270165-28272991	HCR1	H48	OK	195.694	9.9501	-4.63328	0.0002	0.0124383	yes
XLOC_035211	XLOC_035211	LOC_Os04g32680	POEI20 - Pollen Ole e I allergen and extensin family protein precursor, expressed	-4.28617	Down Regulated	Chr4:19690314-19709974	HCR1	H48	OK	854.916	43.8185	-3.08709	0.0009	0.0305186	yes
XLOC_035211	XLOC_035211	LOC_Os04g32690	expressed protein	-4.28617	Down Regulated	Chr4:19690314-19709974	HCR1	H48	OK	854.916	43.8185	-3.08709	0.0009	0.0305186	yes
XLOC_028604	XLOC_028604	LOC_Os03g14030	thaumatin, putative, expressed	-4.23845	Down Regulated	Chr3:7610989-7614083	HCR1	H48	OK	39.966	2.11734	-3.81871	0.00795	0.122304	no
XLOC_024173	XLOC_024173	LOC_Os02g44380	WD domain containing protein, putative, expressed	-4.21039	Down Regulated	Chr2:26866478-26880508	HCR1	H48	OK	10.4989	0.567142	-4.41688	0.00025	0.0149744	yes
XLOC_011462	XLOC_011462	LOC_Os11g17600	roothairless 1, putative, expressed	-4.20252	Down Regulated	Chr11:9794780-9810269	HCR1	H48	OK	9.91827	0.538706	-3.21847	0.0082	0.12549	no
XLOC_042933	XLOC_042933	LOC_Os06g29350	myosin, putative, expressed	-4.17133	Down Regulated	Chr6:16774132-16785410	HCR1	H48	OK	14.1183	0.783591	-4.25503	0.0011	0.0352169	yes
XLOC_031208	XLOC_031208	LOC_Os04g03050	OsSub34 - Putative Subtilisin homologue, expressed	-4.16741	Down Regulated	Chr4:1248449-1285100	HCR1	H48	OK	23.6861	1.31819	-3.91311	0.0014	0.0409502	yes
XLOC_031208	XLOC_031208	LOC_Os04g03100	OsSub35 - Putative Subtilisin homologue, expressed	-4.16741	Down Regulated	Chr4:1248449-1285100	HCR1	H48	OK	23.6861	1.31819	-3.91311	0.0014	0.0409502	yes
XLOC_001025	XLOC_001025	LOC_Os01g23880	expressed protein	-4.1673	Down Regulated	Chr1:13442495-13443696	HCR1	H48	OK	548.656	30.5363	-4.13971	0.0007	0.0282221	yes
XLOC_038970	XLOC_038970	LOC_Os05g48900	fasciclin domain containing protein, expressed	-4.1626	Down Regulated	Chr5:28051692-28052945	HCR1	H48	OK	137.191	7.66054	-4.28294	0.0001	0.00743766	yes
XLOC_035996	XLOC_035996	LOC_Os04g49650	DUF581 domain containing protein, expressed	-4.14425	Down Regulated	Chr4:29605671-29607174	HCR1	H48	OK	276.785	15.653	-3.97316	0.00225	0.0561646	no
XLOC_057340	XLOC_057340	LOC_Os09g35890	kinesin motor domain containing protein, expressed	-4.12268	Down Regulated	Chr9:20654706-20659187	HCR1	H48	OK	58.1038	3.33546	-4.82204	5e-05	0.00429853	yes
XLOC_040919	XLOC_040919	LOC_Os05g40310	expressed protein	-4.11472	Down Regulated	Chr5:23688668-23691121	HCR1	H48	OK	74.0213	4.27269	-3.90678	0.00315	0.071821	no
XLOC_040942	XLOC_040942	LOC_Os05g40740	monocopper oxidase, putative, expressed	-4.11204	Down Regulated	Chr5:23883405-23886135	HCR1	H48	OK	865.05	50.0259	-4.11624	0.00045	0.0222941	yes
XLOC_011014	XLOC_011014	LOC_Os11g06690	serine esterase family protein, putative, expressed	-4.10132	Down Regulated	Chr11:3256398-3261353	HCR1	H48	OK	18.409	1.07253	-4.14878	0.0019	0.050937	no
XLOC_010389	XLOC_010389	LOC_Os10g39950	viral A-type inclusion protein repeat containing protein, expressed	-4.09349	Down Regulated	Chr10:21389825-21399809	HCR1	H48	OK	8.37142	0.490384	-4.16691	0.0044	0.0856842	no
XLOC_003868	XLOC_003868	LOC_Os01g10890	CAMK_KIN1/SNF1/Nim1_like.8 - CAMK includes calcium/calmodulin depedent protein kinases, expressed	-4.08669	Down Regulated	Chr1:5809556-5811617	HCR1	H48	OK	118.801	6.99205	-4.64294	5e-05	0.00429853	yes
XLOC_040704	XLOC_040704	LOC_Os05g35570	DUF803 domain containing, putative, expressed	-4.0827	Down Regulated	Chr5:21135237-21138615	HCR1	H48	OK	20.0257	1.18187	-3.57479	0.00315	0.071821	no
XLOC_028628	XLOC_028628	LOC_Os03g14610	HVA22, putative, expressed	-4.058	Down Regulated	Chr3:7929008-7934471	HCR1	H48	OK	98.7968	5.93146	-4.88894	5e-05	0.00429853	yes
XLOC_014883	XLOC_014883	LOC_Os11g45720	pectinesterase, putative, expressed	-4.04785	Down Regulated	Chr11:27656250-27658409	HCR1	H48	OK	445.328	26.9249	-4.37675	0.0001	0.00743766	yes
XLOC_004507	XLOC_004507	LOC_Os01g25460	uncharacterized protein At4g06744 precursor, putative, expressed	-4.03379	Down Regulated	Chr1:14437844-14439688	HCR1	H48	OK	172.651	10.5409	-3.65699	0.00505	0.0959763	no
XLOC_053785	XLOC_053785	LOC_Os08g06380	CSLF6 - cellulose synthase-like family F; beta1,3;1,4 glucan synthase, expressed	-4.02164	Down Regulated	Chr8:3544162-3550661	HCR1	H48	OK	39.7112	2.445	-4.12969	0.00015	0.0100793	yes
XLOC_055115	XLOC_055115	LOC_Os08g34910	pectinesterase, putative, expressed	-3.99768	Down Regulated	Chr8:21978067-21984054	HCR1	H48	OK	269.709	16.884	-4.49594	5e-05	0.00429853	yes
XLOC_042095	XLOC_042095	LOC_Os06g10210	expressed protein	-3.97594	Down Regulated	Chr6:5227415-5231645	HCR1	H48	OK	119.65	7.60388	-4.91982	5e-05	0.00429853	yes
XLOC_032824	XLOC_032824	LOC_Os04g39610	glycerophosphoryl diester phosphodiesterase family protein, putative, expressed	-3.97351	Down Regulated	Chr4:23606625-23611506	HCR1	H48	OK	12.5951	0.80178	-3.59662	0.0043	0.0840729	no
XLOC_023303	XLOC_023303	LOC_Os02g26320	fasciclin-like arabinogalactan precursor protein, putative, expressed	-3.97285	Down Regulated	Chr2:15459022-15460180	HCR1	H48	OK	119.678	7.62195	-3.61731	0.00165	0.0456719	yes
XLOC_030680	XLOC_030680	LOC_Os03g61510	pectinesterase inhibitor domain containing protein, expressed	-3.96969	Down Regulated	Chr3:34891134-34892049	HCR1	H48	OK	118.847	7.58562	-3.56157	0.00225	0.0561646	no
XLOC_023300	XLOC_023300	LOC_Os02g26290	fasciclin-like arabinogalactan protein 8 precursor, putative, expressed	-3.96911	Down Regulated	Chr2:15436568-15437634	HCR1	H48	OK	289.3	18.4725	-3.97069	0.0006	0.0268165	yes
XLOC_000889	XLOC_000889	LOC_Os01g20970	invertase/pectin methylesterase inhibitor family protein, putative, expressed	-3.95507	Down Regulated	Chr1:11713727-11714442	HCR1	H48	OK	260.6	16.8027	-3.66995	0.0034	0.0764477	no
XLOC_016795	XLOC_016795	LOC_Os12g35690	RALFL5 - Rapid ALkalinization Factor RALF family protein precursor, expressed	-3.94855	Down Regulated	Chr12:21699857-21700997	HCR1	H48	OK	234.587	15.194	-5.14148	0.0001	0.00743766	yes
XLOC_044147	XLOC_044147	LOC_Os06g03610	TKL_IRAK_CrRLK1L-1.13 - The CrRLK1L-1 subfamily has homology to the CrRLK1L homolog, expressed	-3.91997	Down Regulated	Chr6:1397920-1401134	HCR1	H48	OK	258.886	17.1033	-4.38242	0.00015	0.0100793	yes
XLOC_014300	XLOC_014300	LOC_Os11g32650	chalcone synthase, putative, expressed	-3.90104	Down Regulated	Chr11:19277556-19281016	HCR1	H48	OK	83.7352	5.60501	-4.01136	0.00145	0.0409502	yes
XLOC_035220	XLOC_035220	LOC_Os04g32850	basic proline-rich protein, putative, expressed	-3.87429	Down Regulated	Chr4:19835130-19836892	HCR1	H48	OK	175.918	11.9959	-4.21672	0.00045	0.0222941	yes
XLOC_055413	XLOC_055413	LOC_Os08g40990	receptor-like protein kinase 1, putative, expressed	-3.86472	Down Regulated	Chr8:25930878-25934033	HCR1	H48	OK	78.1304	5.36318	-3.78793	0.00495	0.0943826	no
XLOC_028516	XLOC_028516	LOC_Os03g12180	MA3 domain containing protein, expressed	-3.86325	Down Regulated	Chr3:6392810-6395478	HCR1	H48	OK	151.281	10.3951	-4.17102	0.0009	0.0305186	yes
XLOC_023800	XLOC_023800	LOC_Os02g36950	uncharacterized Cys-rich domain containing protein, putative, expressed	-3.85132	Down Regulated	Chr2:22319854-22321276	HCR1	H48	OK	211.055	14.6228	-3.9731	0.0004	0.020991	yes
XLOC_019660	XLOC_019660	LOC_Os02g05040	cyclin-related protein, putative, expressed	-3.82059	Down Regulated	Chr2:2397425-2404976	HCR1	H48	OK	6.24794	0.442206	-3.39987	0.00415	0.0818519	no
XLOC_043796	XLOC_043796	LOC_Os06g47110	COBRA-like protein precursor, putative, expressed	-3.81112	Down Regulated	Chr6:28551554-28554077	HCR1	H48	OK	212.334	15.1271	-4.06378	0.00075	0.0286569	yes
XLOC_044743	XLOC_044743	LOC_Os06g15620	GASR7 - Gibberellin-regulated GASA/GAST/Snakin family protein precursor, expressed	-3.80591	Down Regulated	Chr6:8847701-8848847	HCR1	H48	OK	67.7049	4.84092	-3.28933	0.0067	0.110147	no
XLOC_035266	XLOC_035266	LOC_Os04g33710	expressed protein	-3.80145	Down Regulated	Chr4:20411175-20411922	HCR1	H48	OK	1174.92	84.2671	-3.83285	0.0011	0.0352169	yes
XLOC_044867	XLOC_044867	LOC_Os06g18670	anthocyanidin 3-O-glucosyltransferase, putative, expressed	-3.79928	Down Regulated	Chr6:10588144-10589939	HCR1	H48	OK	58.872	4.22876	-3.25296	0.0084	0.128015	no
XLOC_033737	XLOC_033737	LOC_Os04g01140	cytochrome P450 93A2, putative, expressed	-3.78637	Down Regulated	Chr4:99617-101643	HCR1	H48	OK	72.3571	5.24408	-3.88017	0.00115	0.0363793	yes
XLOC_027172	XLOC_027172	LOC_Os03g45920	tubulin/FtsZ domain containing protein, putative, expressed	-3.7805	Down Regulated	Chr3:25942716-25946741	HCR1	H48	OK	84.8502	6.17462	-3.83151	0.00115	0.0363793	yes
XLOC_048769	XLOC_048769	LOC_Os07g45260	glycosyl transferase 8 domain containing protein, putative, expressed	-3.76377	Down Regulated	Chr7:27006622-27008541	HCR1	H48	OK	50.9362	3.74989	-3.44513	0.003	0.0692654	no
XLOC_005691	XLOC_005691	LOC_Os01g54300	OsMan02 - Endo-Beta-Mannanase, expressed	-3.75711	Down Regulated	Chr1:31248318-31254916	HCR1	H48	OK	45.6276	3.37462	-3.74174	0.00145	0.0409502	yes
XLOC_012870	XLOC_012870	LOC_Os11g01340	omega-3 fatty acid desaturase, chloroplast precursor, putative, expressed	-3.75376	Down Regulated	Chr11:199732-203904	HCR1	H48	OK	17.5747	1.30284	-3.40592	0.0044	0.0856842	no
XLOC_054296	XLOC_054296	LOC_Os08g16830	retrotransposon protein, putative, SINE subclass, expressed	-3.7484	Down Regulated	Chr8:10294173-10295184	HCR1	H48	OK	78.9066	5.87126	-3.35731	0.00765	0.118815	no
XLOC_000724	XLOC_000724	LOC_Os01g16470	phosphatidylinositol kinase, putative, expressed	-3.74154	Down Regulated	Chr1:9348606-9351336	HCR1	H48	OK	190.384	14.2335	-3.62889	0.00395	0.0784898	no
XLOC_011935	XLOC_011935	LOC_Os11g28610	transporter family protein, putative, expressed	-3.73685	Down Regulated	Chr11:16510125-16512724	HCR1	H48	OK	72.7764	5.45868	-3.64707	0.0054	0.099416	no
XLOC_021920	XLOC_021920	LOC_Os02g53990	cyclin-related protein, putative, expressed	-3.72034	Down Regulated	Chr2:33054136-33066629	HCR1	H48	OK	12.5442	0.951724	-3.48047	0.00595	0.100764	no
XLOC_007605	XLOC_007605	LOC_Os10g16974	cytochrome P450, putative, expressed	-3.72014	Down Regulated	Chr10:8494247-8504329	HCR1	H48	OK	46.1829	3.50434	-3.83286	0.001	0.0329538	yes
XLOC_043245	XLOC_043245	LOC_Os06g36240	POEI21 - Pollen Ole e I allergen and extensin family protein precursor, expressed	-3.71082	Down Regulated	Chr6:21222682-21223744	HCR1	H48	OK	450.748	34.4244	-4.00493	0.00125	0.0387745	yes
XLOC_003379	XLOC_003379	LOC_Os01g74510	KIP1, putative, expressed	-3.70561	Down Regulated	Chr1:43154090-43158225	HCR1	H48	OK	7.5237	0.576677	-3.23927	0.0053	0.099416	no
XLOC_044837	XLOC_044837	LOC_Os06g17390	auxin-independent growth promoter protein, putative, expressed	-3.70062	Down Regulated	Chr6:10082201-INF87094	HCR1	H48	OK	13.4463	1.0342	-3.70414	0.0004	0.020991	yes
XLOC_023099	XLOC_023099	LOC_Os02g21340	ABC-2 type transporter family protein, expressed	-3.70024	Down Regulated	Chr2:12663699-12680641	HCR1	H48	OK	13.8015	1.0618	-2.93869	0.0012	0.0377567	yes
XLOC_023099	XLOC_023099	LOC_Os02g21350	pleiotropic drug resistance protein 5, putative, expressed	-3.70024	Down Regulated	Chr2:12663699-12680641	HCR1	H48	OK	13.8015	1.0618	-2.93869	0.0012	0.0377567	yes
XLOC_018854	XLOC_018854	LOC_Os12g35710	uncharacterized protein At4g06744 precursor, putative, expressed	-3.69913	Down Regulated	Chr12:21711239-21713859	HCR1	H48	OK	216.403	16.6616	-4.18348	0.00045	0.0222941	yes
XLOC_039611	XLOC_039611	LOC_Os05g11330	RALFL19 - Rapid ALkalinization Factor RALF family protein precursor, expressed	-3.6989	Down Regulated	Chr5:6405566-6406491	HCR1	H48	OK	110.144	8.48165	-3.85171	0.00545	0.099416	no
XLOC_045825	XLOC_045825	LOC_Os06g39060	glucan endo-1,3-beta-glucosidase precursor, putative, expressed	-3.69831	Down Regulated	Chr6:23187191-23189067	HCR1	H48	OK	175.714	13.5364	-4.15042	0.0011	0.0352169	yes
XLOC_002956	XLOC_002956	LOC_Os01g64960	chlorophyll A-B binding protein, putative, expressed	-3.69477	Down Regulated	Chr1:37696777-37699752	HCR1	H48	OK	203.866	15.7438	-4.18951	0.0002	0.0124383	yes
XLOC_009773	XLOC_009773	LOC_Os10g25560	XI-I, putative, expressed	-3.69253	Down Regulated	Chr10:13231201-13255153	HCR1	H48	OK	15.0918	1.16729	-3.55037	0.00295	0.0682728	no
XLOC_009773	XLOC_009773	LOC_Os10g25565	myosin-Va, putative, expressed	-3.69253	Down Regulated	Chr10:13231201-13255153	HCR1	H48	OK	15.0918	1.16729	-3.55037	0.00295	0.0682728	no
XLOC_026297	XLOC_026297	LOC_Os03g24510	glycosyl transferase 8 domain containing protein, putative, expressed	-3.68435	Down Regulated	Chr3:13970110-13971893	HCR1	H48	OK	92.3398	7.18275	-3.36816	0.00625	0.104572	no
XLOC_003821	XLOC_003821	LOC_Os01g09880	harpin-induced protein 1 domain containing protein, expressed	-3.67895	Down Regulated	Chr1:5131470-5132918	HCR1	H48	OK	44.3881	3.46571	-3.23583	0.00885	0.133206	no
XLOC_053024	XLOC_053024	LOC_Os08g35440	Ser/Thr protein phosphatase family protein, putative, expressed	-3.66789	Down Regulated	Chr8:22334605-22336134	HCR1	H48	OK	47.606	3.74557	-3.56341	0.00405	0.0800416	no
XLOC_024271	XLOC_024271	LOC_Os02g46180	DUF581 domain containing protein, expressed	-3.65362	Down Regulated	Chr2:28136109-28137735	HCR1	H48	OK	98.1106	7.79592	-3.91752	0.00175	0.0480305	yes
XLOC_003427	XLOC_003427	LOC_Os01g02050	phosphoenolpyruvate carboxylase, putative, expressed	-3.64849	Down Regulated	Chr1:562055-572138	HCR1	H48	OK	25.8803	2.06379	-3.75392	0.00075	0.0286569	yes
XLOC_006098	XLOC_006098	LOC_Os01g62950	ras-related protein, putative, expressed	-3.62267	Down Regulated	Chr1:36467914-36470441	HCR1	H48	OK	49.2926	4.00175	-3.70139	0.00075	0.0286569	yes
XLOC_015250	XLOC_015250	LOC_Os12g02340	LTPL14 - Protease inhibitor/seed storage/LTP family protein precursor, expressed	-3.61817	Down Regulated	Chr12:760918-762534	HCR1	H48	OK	931.092	75.8256	-4.29093	0.00015	0.0100793	yes
XLOC_036426	XLOC_036426	LOC_Os04g58100	expressed protein	-3.61224	Down Regulated	Chr4:34601220-34604972	HCR1	H48	OK	17.5089	1.43175	-3.16125	0.00595	0.100764	no
XLOC_046691	XLOC_046691	LOC_Os07g01600	dirigent, putative, expressed	-3.59807	Down Regulated	Chr7:373731-375712	HCR1	H48	OK	30.6163	2.52828	-3.10564	0.00625	0.104572	no
XLOC_028191	XLOC_028191	LOC_Os03g04620	CCT motif family protein, expressed	-3.55736	Down Regulated	Chr3:2159330-2163360	HCR1	H48	OK	22.2671	1.89144	-3.24132	0.0035	0.0771319	no
XLOC_003956	XLOC_003956	LOC_Os01g12660	AAA-type ATPase family protein, putative, expressed	-3.55583	Down Regulated	Chr1:6970860-6976767	HCR1	H48	OK	23.1501	1.96853	-3.94542	0.0004	0.020991	yes
XLOC_019091	XLOC_019091	LOC_Os12g41180	LSTK-1-like kinase, putative, expressed	-3.5522	Down Regulated	Chr12:25518231-25522441	HCR1	H48	OK	26.7267	2.27838	-3.60829	0.0025	0.0599467	no
XLOC_007619	XLOC_007619	LOC_Os10g17260	cytochrome P450, putative, expressed	-3.55134	Down Regulated	Chr10:8679309-8681284	HCR1	H48	OK	6.47575	0.552369	-2.61574	0.0025	0.0599467	no
XLOC_033718	XLOC_033718	LOC_Os04g59440	chlorophyll A-B binding protein, putative, expressed	-3.5473	Down Regulated	Chr4:35337066-35338192	HCR1	H48	OK	53.9657	4.6161	-3.20919	0.0087	0.131422	no
XLOC_033080	XLOC_033080	LOC_Os04g45290	glycosyl hydrolases, putative, expressed	-3.54144	Down Regulated	Chr4:26765198-26771893	HCR1	H48	OK	186.776	16.0414	-3.86448	5e-05	0.00429853	yes
XLOC_011499	XLOC_011499	LOC_Os11g18570	cytochrome P450, putative, expressed	-3.5306	Down Regulated	Chr11:10474863-10477749	HCR1	H48	OK	82.8428	7.16864	-3.94662	0.0003	0.0170603	yes
XLOC_020242	XLOC_020242	LOC_Os02g17240	ATROPGEF7/ROPGEF7, putative, expressed	-3.52707	Down Regulated	Chr2:9885608-9888394	HCR1	H48	OK	263.684	22.8734	-3.96368	0.00025	0.0149744	yes
XLOC_034723	XLOC_034723	LOC_Os04g21710	expressed protein	-3.51925	Down Regulated	Chr4:12279146-12281637	HCR1	H48	OK	165.883	14.4678	-4.26788	5e-05	0.00429853	yes
XLOC_010284	XLOC_010284	LOC_Os10g37230	expressed protein	-3.51106	Down Regulated	Chr10:19915686-19916952	HCR1	H48	OK	84.7199	7.43105	-3.69825	0.00155	0.0433555	yes
XLOC_040898	XLOC_040898	LOC_Os05g39990	expansin precursor, putative, expressed	-3.50984	Down Regulated	Chr5:23495605-23497572	HCR1	H48	OK	155.399	13.6422	-4.20777	5e-05	0.00429853	yes
XLOC_018991	XLOC_018991	LOC_Os12g38860	transposon protein, putative, unclassified, expressed	-3.50709	Down Regulated	Chr12:23885310-23889010	HCR1	H48	OK	202.251	17.789	-3.96314	0.00035	0.0191224	yes
XLOC_035721	XLOC_035721	LOC_Os04g44240	cytokinin-O-glucosyltransferase 3, putative, expressed	-3.5021	Down Regulated	Chr4:26206038-26207903	HCR1	H48	OK	32.956	2.90868	-3.19773	0.0058	0.099416	no
XLOC_003845	XLOC_003845	LOC_Os01g10470	RALFL17 - Rapid ALkalinization Factor RALF family protein precursor, expressed	-3.49112	Down Regulated	Chr1:5540628-5541520	HCR1	H48	OK	297.739	26.4791	-3.54547	0.0007	0.0282221	yes
XLOC_025741	XLOC_025741	LOC_Os03g12570	expressed protein	-3.49031	Down Regulated	Chr3:6657524-6668721	HCR1	H48	OK	181.307	16.1334	-3.95802	0.0078	0.120568	no
XLOC_001161	XLOC_001161	LOC_Os01g27190	C2 domain containing protein, putative, expressed	-3.47787	Down Regulated	Chr1:15160422-15161640	HCR1	H48	OK	1083.56	97.2542	-3.73765	0.0004	0.020991	yes
XLOC_025688	XLOC_025688	LOC_Os03g11650	ATMAP70 protein, putative, expressed	-3.43841	Down Regulated	Chr3:6075461-6084525	HCR1	H48	OK	39.7707	3.66858	-3.70426	0.00085	0.0291957	yes
XLOC_039493	XLOC_039493	LOC_Os05g08554	expressed protein	-3.43116	Down Regulated	Chr5:4665263-4667919	HCR1	H48	OK	236.22	21.8995	-4.06127	5e-05	0.00429853	yes
XLOC_042197	XLOC_042197	LOC_Os06g12210	helix-loop-helix DNA-binding domain containing protein, expressed	-3.42784	Down Regulated	Chr6:6556290-6558007	HCR1	H48	OK	14.0333	1.304	-1.46211	0.00685	0.111983	no
XLOC_025207	XLOC_025207	LOC_Os03g01640	expansin precursor, putative, expressed	-3.42406	Down Regulated	Chr3:397340-398440	HCR1	H48	OK	216.844	20.2024	-3.88093	0.00135	0.0399802	yes
XLOC_030681	XLOC_030681	LOC_Os03g61530	invertase/pectin methylesterase inhibitor family protein, putative, expressed	-3.42251	Down Regulated	Chr3:34895343-34896125	HCR1	H48	OK	169.339	15.7935	-3.14391	0.00695	0.113238	no
XLOC_010877	XLOC_010877	LOC_Os11g04170	CAMK_CAMK_like.42 - CAMK includes calcium/calmodulin depedent protein kinases, expressed	-3.41792	Down Regulated	Chr11:1691860-1694301	HCR1	H48	OK	22.0382	2.06195	-3.28103	0.0051	0.0966751	no
XLOC_004051	XLOC_004051	LOC_Os01g14670	Cupin domain containing protein, expressed	-3.41665	Down Regulated	Chr1:8203764-8206969	HCR1	H48	OK	268.951	25.186	-4.21074	0.00015	0.0100793	yes
XLOC_020616	XLOC_020616	LOC_Os02g25900	pollen signalling protein with adenylyl cyclase activity, putative, expressed	-3.38336	Down Regulated	Chr2:15192253-15196729	HCR1	H48	OK	161.723	15.4981	-3.7244	0.0001	0.00743766	yes
XLOC_057534	XLOC_057534	LOC_Os09g39930	tyrosine protein kinase domain containing protein, putative, expressed	-3.36752	Down Regulated	Chr9:22902938-22904835	HCR1	H48	OK	98.956	9.58778	-3.62324	0.0027	0.0635947	no
XLOC_022388	XLOC_022388	LOC_Os02g05670	expressed protein	-3.36413	Down Regulated	Chr2:2772142-2774720	HCR1	H48	OK	778.828	75.6376	-3.59905	0.0011	0.0352169	yes
XLOC_029347	XLOC_029347	LOC_Os03g31430	terpene synthase, N-terminal domain containing protein, expressed	-3.36264	Down Regulated	Chr3:17899360-17912533	HCR1	H48	OK	44.864	4.36157	-3.97644	0.001	0.0329538	yes
XLOC_002598	XLOC_002598	LOC_Os01g57940	tyrosine protein kinase domain containing protein, putative, expressed	-3.36054	Down Regulated	Chr1:33494601-33496693	HCR1	H48	OK	259.674	25.2816	-3.57288	0.00235	0.0571944	no
XLOC_005964	XLOC_005964	LOC_Os01g60110	E2F-related protein, putative, expressed	-3.35883	Down Regulated	Chr1:34769116-34772371	HCR1	H48	OK	36.5439	3.5621	-3.49695	0.0021	0.0541774	no
XLOC_042433	XLOC_042433	LOC_Os06g17450	expressed protein	-3.35452	Down Regulated	Chr6:10126747-10127412	HCR1	H48	OK	1440.58	140.84	-3.68293	0.0005	0.0238029	yes
XLOC_006047	XLOC_006047	LOC_Os01g61910	KIP1, putative, expressed	-3.35423	Down Regulated	Chr1:35832416-35836375	HCR1	H48	OK	17.6961	1.73043	-3.74499	0.00105	0.0341017	yes
XLOC_051397	XLOC_051397	LOC_Os08g02094	GDSL-like lipase/acylhydrolase, putative, expressed	-3.34642	Down Regulated	Chr8:686287-693880	HCR1	H48	OK	23.8496	2.34481	-2.88123	0.0069	0.112611	no
XLOC_010420	XLOC_010420	LOC_Os10g40550	CPuORF23 - conserved peptide uORF-containing transcript, expressed	-3.34395	Down Regulated	Chr10:21706908-21710977	HCR1	H48	OK	10.0122	0.986053	-2.99215	0.0066	0.108993	no
XLOC_010420	XLOC_010420	LOC_Os10g40555	expressed protein	-3.34395	Down Regulated	Chr10:21706908-21710977	HCR1	H48	OK	10.0122	0.986053	-2.99215	0.0066	0.108993	no
XLOC_015234	XLOC_015234	LOC_Os12g02080	peroxidase precursor, putative, expressed	-3.33679	Down Regulated	Chr12:623548-626113	HCR1	H48	OK	38.9771	3.85777	-2.90068	0.00625	0.104572	no
XLOC_010104	XLOC_010104	LOC_Os10g33250	WAX2, putative, expressed	-3.31241	Down Regulated	Chr10:17448950-17454855	HCR1	H48	OK	64.0687	6.44927	-4.01749	0.00015	0.0100793	yes
XLOC_062669	XLOC_062669	LOC_Os09g32470	membrane protein, putative, expressed	-3.30426	Down Regulated	Chr9:19384604-19387021	HCR1	H48	OK	17.6081	1.78251	-2.87498	0.00785	0.121277	no
XLOC_036166	XLOC_036166	LOC_Os04g53330	RNA recognition motif containing protein, putative, expressed	-3.26919	Down Regulated	Chr4:31763973-31766935	HCR1	H48	OK	14.2996	1.4832	-3.09892	0.0073	0.116042	no
XLOC_053485	XLOC_053485	LOC_Os08g44790	expansin precursor, putative, expressed	-3.26359	Down Regulated	Chr8:28137548-28138715	HCR1	H48	OK	249.615	25.9915	-3.61971	0.0026	0.0617368	no
XLOC_022317	XLOC_022317	LOC_Os02g04030	phosphatidylinositol transfer, putative, expressed	-3.24919	Down Regulated	Chr2:1748458-1753303	HCR1	H48	OK	160.72	16.9031	-3.62691	0.00135	0.0399802	yes
XLOC_010798	XLOC_010798	LOC_Os11g02424	LTPL9 - Protease inhibitor/seed storage/LTP family protein precursor, expressed	-3.23425	Down Regulated	Chr11:722929-726974	HCR1	H48	OK	424.474	45.1072	-3.97351	0.0002	0.0124383	yes
XLOC_030181	XLOC_030181	LOC_Os03g50280	GLTP domain containing protein, putative, expressed	-3.21959	Down Regulated	Chr3:28655239-28657434	HCR1	H48	OK	161.263	17.3119	-2.9261	0.0038	0.0771319	no
XLOC_026009	XLOC_026009	LOC_Os03g18140	expressed protein	-3.21768	Down Regulated	Chr3:10147976-10153118	HCR1	H48	OK	29.024	3.11989	-3.34199	0.0013	0.0387745	yes
XLOC_040963	XLOC_040963	LOC_Os05g41150	expressed protein	-3.21431	Down Regulated	Chr5:24103644-24106552	HCR1	H48	OK	11.679	1.25835	-3.2654	0.0017	0.04679	yes
XLOC_026816	XLOC_026816	LOC_Os03g37120	retrotransposon protein, putative, unclassified, expressed	-3.19617	Down Regulated	Chr3:20569312-20572626	HCR1	H48	OK	105.992	11.5646	-3.45036	0.00715	0.115722	no
XLOC_016569	XLOC_016569	LOC_Os12g31000	pumilio-family RNA binding repeat domain containing protein, expressed	-3.19474	Down Regulated	Chr12:18618481-18621147	HCR1	H48	OK	33.9681	3.70988	-3.43903	0.0022	0.0561646	no
XLOC_002313	XLOC_002313	LOC_Os01g51980	alliin lyase precursor, putative, expressed	-3.19333	Down Regulated	Chr1:29874485-29877505	HCR1	H48	OK	22.4949	2.45922	-2.80237	0.0063	0.105228	no
XLOC_024526	XLOC_024526	LOC_Os02g51320	helix-loop-helix DNA-binding domain containing protein, expressed	-3.1899	Down Regulated	Chr2:31423942-31425239	HCR1	H48	OK	44.3712	4.86234	-2.88998	0.00925	0.137387	no
XLOC_026482	XLOC_026482	LOC_Os03g28090	pectinesterase, putative, expressed	-3.18054	Down Regulated	Chr3:16151223-16153558	HCR1	H48	OK	119.368	13.1659	-3.4215	0.0027	0.0635947	no
XLOC_002485	XLOC_002485	LOC_Os01g55520	ATROPGEF7/ROPGEF7, putative, expressed	-3.17951	Down Regulated	Chr1:31986498-31989237	HCR1	H48	OK	75.0858	8.2876	-3.76809	0.0007	0.0282221	yes
XLOC_006403	XLOC_006403	LOC_Os01g69030	sucrose-phosphate synthase, putative, expressed	-3.17097	Down Regulated	Chr1:40101403-40107195	HCR1	H48	OK	101.373	11.2555	-3.6653	5e-05	0.00429853	yes
XLOC_035491	XLOC_035491	LOC_Os04g39489	amino acid transporter, putative, expressed	-3.14392	Down Regulated	Chr4:23512377-23523269	HCR1	H48	OK	96.3335	10.8984	-3.08275	0.0007	0.0282221	yes
XLOC_026255	XLOC_026255	LOC_Os03g23030	aberrant pollen transmission 1, putative, expressed	-3.14383	Down Regulated	Chr3:13293877-13309736	HCR1	H48	OK	22.5688	2.55341	-2.63474	0.0047	0.0906805	no
XLOC_004288	XLOC_004288	LOC_Os01g19850	amino acid permease family protein, putative, expressed	-3.14037	Down Regulated	Chr1:11253686-11266505	HCR1	H48	OK	5.59981	0.635081	-2.27773	0.00755	0.117574	no
XLOC_004288	XLOC_004288	LOC_Os01g19860	expressed protein	-3.14037	Down Regulated	Chr1:11253686-11266505	HCR1	H48	OK	5.59981	0.635081	-2.27773	0.00755	0.117574	no
XLOC_008190	XLOC_008190	LOC_Os10g31040	Citrate transporter protein, putative, expressed	-3.13612	Down Regulated	Chr10:16225410-16238853	HCR1	H48	OK	77.5834	8.82478	-3.79332	0.0005	0.0238029	yes
XLOC_019829	XLOC_019829	LOC_Os02g07870	ATP synthase, putative, expressed	-3.12582	Down Regulated	Chr2:4119975-4127542	HCR1	H48	OK	29.5214	3.38199	-3.55284	0.0013	0.0387745	yes
XLOC_028188	XLOC_028188	LOC_Os03g04560	expressed protein	-3.0781	Down Regulated	Chr3:2125778-2129696	HCR1	H48	OK	49.6617	5.88061	-3.65376	0.0014	0.0409502	yes
XLOC_038038	XLOC_038038	LOC_Os05g28690	expressed protein	-3.07252	Down Regulated	Chr5:16830082-16842294	HCR1	H48	OK	3.42675	0.407346	-2.45939	0.00835	0.127385	no
XLOC_041198	XLOC_041198	LOC_Os05g47540	CPuORF26 - conserved peptide uORF-containing transcript, expressed	-3.06669	Down Regulated	Chr5:27229400-27233702	HCR1	H48	OK	25.5785	3.05288	-3.43031	0.0013	0.0387745	yes
XLOC_041198	XLOC_041198	LOC_Os05g47545	expressed protein	-3.06669	Down Regulated	Chr5:27229400-27233702	HCR1	H48	OK	25.5785	3.05288	-3.43031	0.0013	0.0387745	yes
XLOC_040572	XLOC_040572	LOC_Os05g32960	expressed protein	-3.06036	Down Regulated	Chr5:19311256-19313797	HCR1	H48	OK	79.3007	9.50645	-3.81109	0.0003	0.0170603	yes
XLOC_008274	XLOC_008274	LOC_Os10g33240	expressed protein	-3.05584	Down Regulated	Chr10:17437473-17441023	HCR1	H48	OK	171.492	20.6227	-3.53497	0.0005	0.0238029	yes
XLOC_043489	XLOC_043489	LOC_Os06g40890	polygalacturonase, putative, expressed	-3.04853	Down Regulated	Chr6:24384024-24386078	HCR1	H48	OK	242.033	29.2533	-3.40616	0.0049	0.0937963	no
XLOC_047306	XLOC_047306	LOC_Os07g14340	retrotransposon protein, putative, unclassified, expressed	-3.01232	Down Regulated	Chr7:8191034-8192584	HCR1	H48	OK	549.362	68.0861	-3.34402	0.0005	0.0238029	yes
XLOC_025840	XLOC_025840	LOC_Os03g14690	vacuolar ATP synthase 98 kDa subunit, putative, expressed	-2.98395	Down Regulated	Chr3:7982395-7989437	HCR1	H48	OK	30.1366	3.80921	-3.62404	0.0005	0.0238029	yes
XLOC_022264	XLOC_022264	LOC_Os02g02840	ras-related protein, putative, expressed	-2.9745	Down Regulated	Chr2:1080512-1084283	HCR1	H48	OK	99.3938	12.6458	-3.58642	0.0004	0.020991	yes
XLOC_002970	XLOC_002970	LOC_Os01g65210	proton-dependent oligopeptide transport, putative, expressed	-2.97149	Down Regulated	Chr1:37837079-37843664	HCR1	H48	OK	23.0128	2.934	-3.05898	0.0039	0.0778137	no
XLOC_004192	XLOC_004192	LOC_Os01g18050	tubulin/FtsZ domain containing protein, putative, expressed	-2.96895	Down Regulated	Chr1:10098281-10103021	HCR1	H48	OK	64.0735	8.18342	-3.6194	0.0006	0.0268165	yes
XLOC_047266	XLOC_047266	LOC_Os07g13580	glucan endo-1,3-beta-glucosidase precursor, putative, expressed	-2.96832	Down Regulated	Chr7:7786680-7788855	HCR1	H48	OK	91.5928	11.7033	-3.38198	0.0016	0.0444563	yes
XLOC_012735	XLOC_012735	LOC_Os11g45610	retrotransposon protein, putative, unclassified, expressed	-2.95797	Down Regulated	Chr11:27598303-27603116	HCR1	H48	OK	2.63202	0.338728	-2.46089	0.00975	0.142997	no
XLOC_016209	XLOC_016209	LOC_Os12g23190	tyrosine phosphatase family protein, putative, expressed	-2.9476	Down Regulated	Chr12:13110810-13114316	HCR1	H48	OK	50.1814	6.50471	-3.15975	0.00195	0.050937	no
XLOC_061931	XLOC_061931	LOC_Os09g15790	ras-related protein, putative, expressed	-2.94585	Down Regulated	Chr9:9643528-9650588	HCR1	H48	OK	57.6085	7.47647	-2.75045	0.00575	0.099416	no
XLOC_061931	XLOC_061931	LOC_Os09g15800	tetratricopeptide-like helical, putative, expressed	-2.94585	Down Regulated	Chr9:9643528-9650588	HCR1	H48	OK	57.6085	7.47647	-2.75045	0.00575	0.099416	no
XLOC_025636	XLOC_025636	LOC_Os03g10640	calcium-transporting ATPase, plasma membrane-type, putative, expressed	-2.94425	Down Regulated	Chr3:5433905-5440327	HCR1	H48	OK	21.5434	2.79903	-3.23498	0.00065	0.0282221	yes
XLOC_043675	XLOC_043675	LOC_Os06g44610	membrane associated DUF588 domain containing protein, putative, expressed	-2.92429	Down Regulated	Chr6:26937146-26941036	HCR1	H48	OK	147.081	19.3757	-3.6007	0.00045	0.0222941	yes
XLOC_018014	XLOC_018014	LOC_Os12g17600	ribulose bisphosphate carboxylase small chain, chloroplast precursor, putative, expressed	-2.92122	Down Regulated	Chr12:10080397-INF81661	HCR1	H48	OK	1558.14	205.698	-2.85975	0.00495	0.0943826	no
XLOC_025560	XLOC_025560	LOC_Os03g08610	leucine-rich repeat family protein, putative, expressed	-2.92011	Down Regulated	Chr3:4434523-4439874	HCR1	H48	OK	32.0646	4.23628	-3.03283	0.0039	0.0778137	no
XLOC_035275	XLOC_035275	LOC_Os04g33990	harpin-induced protein 1 domain containing protein, expressed	-2.90573	Down Regulated	Chr4:20579348-20580533	HCR1	H48	OK	134.397	17.934	-3.30304	0.0013	0.0387745	yes
XLOC_000217	XLOC_000217	LOC_Os01g05430	OsRhmbd1 - Putative Rhomboid homologue, expressed	-2.90516	Down Regulated	Chr1:2566907-2570029	HCR1	H48	OK	30.2691	4.04073	-3.37427	0.0013	0.0387745	yes
XLOC_050198	XLOC_050198	LOC_Os07g27810	fiber protein Fb34, putative, expressed	-2.90284	Down Regulated	Chr7:16226487-16230771	HCR1	H48	OK	54.0086	7.22137	-3.0541	0.00575	0.099416	no
XLOC_026436	XLOC_026436	LOC_Os03g27110	hydrolase protein, putative, expressed	-2.90253	Down Regulated	Chr3:15528225-15530171	HCR1	H48	OK	715.374	95.6717	-3.21735	0.00105	0.0341017	yes
XLOC_030411	XLOC_030411	LOC_Os03g56060	CSLC9 - cellulose synthase-like family C, expressed	-2.89202	Down Regulated	Chr3:31930540-31934688	HCR1	H48	OK	42.8927	5.77828	-3.43063	0.00035	0.0191224	yes
XLOC_024385	XLOC_024385	LOC_Os02g48370	ARID/BRIGHT DNA-binding domain-containing protein, putative, expressed	-2.87611	Down Regulated	Chr2:29611155-29616291	HCR1	H48	OK	16.2267	2.21021	-3.00047	0.0053	0.099416	no
XLOC_000765	XLOC_000765	LOC_Os01g17390	OsFBX5 - F-box domain containing protein, expressed	-2.86322	Down Regulated	Chr1:10003949-INF07768	HCR1	H48	OK	440.213	60.499	-3.36851	0.00145	0.0409502	yes
XLOC_005751	XLOC_005751	LOC_Os01g55440	CAMK_KIN1/SNF1/Nim1_like.1 - CAMK includes calcium/calmodulin depedent protein kinases, expressed	-2.86145	Down Regulated	Chr1:31938441-31940188	HCR1	H48	OK	80.6588	11.0986	-3.20837	0.00295	0.0682728	no
XLOC_051139	XLOC_051139	LOC_Os07g48910	retrotransposon protein, putative, unclassified, expressed	-2.85615	Down Regulated	Chr7:29268216-29270207	HCR1	H48	OK	209.069	28.8738	-3.46294	0.0006	0.0268165	yes
XLOC_027581	XLOC_027581	LOC_Os03g55040	UDP-glucoronosyl and UDP-glucosyl transferase domain containing protein, expressed	-2.84506	Down Regulated	Chr3:31298865-31301009	HCR1	H48	OK	34.4158	4.78972	-3.1659	0.00105	0.0341017	yes
XLOC_044426	XLOC_044426	LOC_Os06g09230	serine threonine kinase, putative, expressed	-2.84202	Down Regulated	Chr6:4640590-4645101	HCR1	H48	OK	86.2177	12.0244	-3.31654	0.00065	0.0282221	yes
XLOC_030208	XLOC_030208	LOC_Os03g51010	hydrolase, alpha/beta fold family domain containing protein, expressed	-2.8372	Down Regulated	Chr3:29150119-29153687	HCR1	H48	OK	164.188	22.9751	-3.723	5e-05	0.00429853	yes
XLOC_010430	XLOC_010430	LOC_Os10g40720	expansin precursor, putative, expressed	-2.83519	Down Regulated	Chr10:21847803-21849726	HCR1	H48	OK	66.5655	9.32762	-2.812	0.00685	0.111983	no
XLOC_030232	XLOC_030232	LOC_Os03g51620	DUF221 domain containing protein, expressed	-2.82801	Down Regulated	Chr3:29543828-29550120	HCR1	H48	OK	18.1964	2.56254	-2.92921	0.0047	0.0906805	no
XLOC_003054	XLOC_003054	LOC_Os01g67090	IQ calmodulin-binding motif domain containing protein, expressed	-2.82793	Down Regulated	Chr1:38943036-38950827	HCR1	H48	OK	30.6963	4.32309	-2.83713	0.0092	0.136853	no
XLOC_020148	XLOC_020148	LOC_Os02g15594	protein phosphatase 2C, putative, expressed	-2.82568	Down Regulated	Chr2:8760001-8766268	HCR1	H48	OK	71.591	10.0982	-3.55248	0.0004	0.020991	yes
XLOC_020828	XLOC_020828	LOC_Os02g30100	cytochrome P450, putative, expressed	-2.8216	Down Regulated	Chr2:17873661-17876075	HCR1	H48	OK	90.2247	12.7626	-3.43598	0.00095	0.0318081	yes
XLOC_019742	XLOC_019742	LOC_Os02g06540	transporter family protein, putative, expressed	-2.78874	Down Regulated	Chr2:3266010-3268767	HCR1	H48	OK	54.6284	7.90538	-2.98491	0.0054	0.099416	no
XLOC_004163	XLOC_004163	LOC_Os01g16960	pyruvate kinase, putative, expressed	-2.78404	Down Regulated	Chr1:9694026-9699817	HCR1	H48	OK	63.383	9.20225	-3.42814	0.00065	0.0282221	yes
XLOC_042114	XLOC_042114	LOC_Os06g10480	expressed protein	-2.78311	Down Regulated	Chr6:5393250-5406655	HCR1	H48	OK	27.5141	3.9972	-3.36075	0.00065	0.0282221	yes
XLOC_014882	XLOC_014882	LOC_Os11g45710	Os11bglu36 SFR2 homologue, expressed	-2.77362	Down Regulated	Chr11:27648701-27655231	HCR1	H48	OK	17.0812	2.4979	-2.70602	0.0049	0.0937963	no
XLOC_030620	XLOC_030620	LOC_Os03g60340	leaf senescence related protein, putative, expressed	-2.77309	Down Regulated	Chr3:34311080-34314802	HCR1	H48	OK	57.5507	8.41913	-3.15473	0.00115	0.0363793	yes
XLOC_035676	XLOC_035676	LOC_Os04g43290	ARPC2B, putative, expressed	-2.76345	Down Regulated	Chr4:25608129-25611104	HCR1	H48	OK	16.7918	2.47296	-2.78957	0.00755	0.117574	no
XLOC_047956	XLOC_047956	LOC_Os07g28930	expressed protein	-2.75779	Down Regulated	Chr7:16965122-16969964	HCR1	H48	OK	14.6279	2.16274	-3.12691	0.00275	0.0645643	no
XLOC_028930	XLOC_028930	LOC_Os03g21250	glycosyl transferase, family 8, putative, expressed	-2.75711	Down Regulated	Chr3:12133468-12138706	HCR1	H48	OK	11.4549	1.69441	-2.77117	0.0067	0.110147	no
XLOC_041826	XLOC_041826	LOC_Os06g04790	HAD superfamily phosphatase, putative, expressed	-2.74267	Down Regulated	Chr6:2088473-2091021	HCR1	H48	OK	63.9424	9.55351	-3.01662	0.006	0.101434	no
XLOC_044359	XLOC_044359	LOC_Os06g08090	heparanase-like protein precursor, putative, expressed	-2.7306	Down Regulated	Chr6:3924680-3927945	HCR1	H48	OK	26.5782	4.00437	-2.86531	0.00495	0.0943826	no
XLOC_028629	XLOC_028629	LOC_Os03g14615	LTPL117 - Protease inhibitor/seed storage/LTP family protein precursor, expressed	-2.71799	Down Regulated	Chr3:7938729-7940193	HCR1	H48	OK	78.6377	11.9519	-2.89935	0.00735	0.116042	no
XLOC_038296	XLOC_038296	LOC_Os05g34320	beta-hexosaminidase precursor, putative, expressed	-2.70584	Down Regulated	Chr5:20314679-20320719	HCR1	H48	OK	11.1757	1.71291	-2.71841	0.0056	0.099416	no
XLOC_038396	XLOC_038396	LOC_Os05g36260	soluble inorganic pyrophosphatase, putative, expressed	-2.69564	Down Regulated	Chr5:21491659-21493705	HCR1	H48	OK	43.4824	6.71191	-2.76044	0.0062	0.104273	no
XLOC_062471	XLOC_062471	LOC_Os09g27700	microtubule associated protein, putative, expressed	-2.69513	Down Regulated	Chr9:16855315-16861064	HCR1	H48	OK	29.8146	4.60379	-3.0785	0.0013	0.0387745	yes
XLOC_012025	XLOC_012025	LOC_Os11g30500	HVA22, putative, expressed	-2.68728	Down Regulated	Chr11:17729024-17730347	HCR1	H48	OK	36.6181	5.68516	-2.62442	0.0051	0.0966751	no
XLOC_053837	XLOC_053837	LOC_Os08g07500	DUF617 domain containing protein, expressed	-2.68078	Down Regulated	Chr8:4211442-4212914	HCR1	H48	OK	311.475	48.5768	-2.78372	0.0097	0.142621	no
XLOC_026019	XLOC_026019	LOC_Os03g18360	BTBT1 - Bric-a-Brac, Tramtrack, Broad Complex BTB domain with tetratricopeptide repeats, expressed	-2.67544	Down Regulated	Chr3:10286454-10291613	HCR1	H48	OK	37.0458	5.79897	-2.93107	0.00115	0.0363793	yes
XLOC_049669	XLOC_049669	LOC_Os07g15370	metal transporter Nramp6, putative, expressed	-2.67175	Down Regulated	Chr7:8871435-8878905	HCR1	H48	OK	58.0486	9.10995	-3.20551	0.00145	0.0409502	yes
XLOC_040842	XLOC_040842	LOC_Os05g38770	protein kinase APK1B, chloroplast precursor, putative, expressed	-2.66138	Down Regulated	Chr5:22745075-22747649	HCR1	H48	OK	172.097	27.2032	-3.1504	0.0016	0.0444563	yes
XLOC_041998	XLOC_041998	LOC_Os06g08080	inorganic H+ pyrophosphatase, putative, expressed	-2.65977	Down Regulated	Chr6:3919500-3924409	HCR1	H48	OK	87.3991	13.8305	-3.28864	0.0003	0.0170603	yes
XLOC_006245	XLOC_006245	LOC_Os01g66030	OsMADS2 - MADS-box family gene with MIKCc type-box, expressed	-2.6444	Down Regulated	Chr1:38319059-38324202	HCR1	H48	OK	100.202	16.0263	-3.36055	0.00075	0.0286569	yes
XLOC_050856	XLOC_050856	LOC_Os07g42420	3-oxoacyl-synthase, putative, expressed	-2.64077	Down Regulated	Chr7:25392942-25398603	HCR1	H48	OK	35.3667	5.6708	-3.0899	0.0016	0.0444563	yes
XLOC_022017	XLOC_022017	LOC_Os02g55910	monogalactosyldiacylglycerol synthase, putative, expressed	-2.63271	Down Regulated	Chr2:34223116-34227621	HCR1	H48	OK	67.242	10.8422	-3.44617	0.00055	0.0253173	yes
XLOC_025228	XLOC_025228	LOC_Os03g01990	lysM domain containing protein, putative, expressed	-2.62592	Down Regulated	Chr3:621021-624074	HCR1	H48	OK	40.0813	6.49324	-3.01635	0.00345	0.0771319	no
XLOC_022923	XLOC_022923	LOC_Os02g17780	ent-kaurene synthase, chloroplast precursor, putative, expressed	-2.62541	Down Regulated	Chr2:10273717-10283775	HCR1	H48	OK	37.6201	6.09667	-3.36763	0.00035	0.0191224	yes
XLOC_022607	XLOC_022607	LOC_Os02g10630	GRAM and C2 domains containing protein, putative, expressed	-2.62195	Down Regulated	Chr2:5586938-5593645	HCR1	H48	OK	11.381	1.84882	-2.77502	0.0067	0.110147	no
XLOC_050621	XLOC_050621	LOC_Os07g37350	armadillo/beta-catenin repeat family protein, putative, expressed	-2.61837	Down Regulated	Chr7:22370219-22372673	HCR1	H48	OK	21.8437	3.55727	-2.5589	0.0052	0.0981886	no
XLOC_036189	XLOC_036189	LOC_Os04g53760	kinesin motor domain containing protein, putative, expressed	-2.61612	Down Regulated	Chr4:32033884-32039122	HCR1	H48	OK	6.80918	1.11062	-2.66285	0.0077	0.119464	no
XLOC_047072	XLOC_047072	LOC_Os07g09384	expressed protein	-2.57801	Down Regulated	Chr7:4940553-4946653	HCR1	H48	OK	32.4555	5.4354	-3.27046	0.0017	0.04679	yes
XLOC_039716	XLOC_039716	LOC_Os05g13900	retrotransposon protein, putative, unclassified, expressed	-2.57568	Down Regulated	Chr5:7721627-7748295	HCR1	H48	OK	427.92	71.7803	-2.93484	0.00205	0.0533109	no
XLOC_039716	XLOC_039716	LOC_Os05g13940	retrotransposon protein, putative, unclassified, expressed	-2.57568	Down Regulated	Chr5:7721627-7748295	HCR1	H48	OK	427.92	71.7803	-2.93484	0.00205	0.0533109	no
XLOC_006115	XLOC_006115	LOC_Os01g63270	alpha-glucan phosphorylast isozyme, putative, expressed	-2.57296	Down Regulated	Chr1:36670220-36676478	HCR1	H48	OK	255.68	42.9693	-2.93651	0.0026	0.0617368	no
XLOC_057218	XLOC_057218	LOC_Os09g32080	CHIT13 - Chitinase family protein precursor, expressed	-2.54855	Down Regulated	Chr9:19148038-19150047	HCR1	H48	OK	27.8497	4.76025	-2.8417	0.0053	0.099416	no
XLOC_018203	XLOC_018203	LOC_Os12g22284	white-brown complex homolog protein 11, putative, expressed	-2.54414	Down Regulated	Chr12:12568756-12587082	HCR1	H48	OK	9.5463	1.63671	-2.59182	0.00975	0.142997	no
XLOC_024004	XLOC_024004	LOC_Os02g40784	WAX2, putative, expressed	-2.52619	Down Regulated	Chr2:24718046-24725502	HCR1	H48	OK	24.5331	4.25886	-2.93351	0.0036	0.0771319	no
XLOC_026201	XLOC_026201	LOC_Os03g21880	THION28 - Plant thionin family protein precursor, expressed	-2.5198	Down Regulated	Chr3:12514989-12515564	HCR1	H48	OK	260.63	45.4453	-2.67276	0.0098	0.143442	no
XLOC_054645	XLOC_054645	LOC_Os08g25010	TBC domain containing protein, expressed	-2.51091	Down Regulated	Chr8:15163268-15167086	HCR1	H48	OK	38.9484	6.83329	-3.26659	0.0004	0.020991	yes
XLOC_020161	XLOC_020161	LOC_Os02g15860	expressed protein	-2.50244	Down Regulated	Chr2:8973634-8974427	HCR1	H48	OK	89.0926	15.7229	-2.07466	0.00845	0.128575	no
XLOC_032581	XLOC_032581	LOC_Os04g33740	glycosyl hydrolases, putative, expressed	-2.48058	Down Regulated	Chr4:20422170-20427062	HCR1	H48	OK	46.4342	8.31971	-3.00458	0.0018	0.049172	yes
XLOC_046282	XLOC_046282	LOC_Os06g48300	protein phosphatase 2C, putative, expressed	-2.47889	Down Regulated	Chr6:29207381-29211031	HCR1	H48	OK	103.294	18.5291	-3.1435	0.00115	0.0363793	yes
XLOC_050029	XLOC_050029	LOC_Os07g24190	CESA3 - cellulose synthase, expressed	-2.45408	Down Regulated	Chr7:13741283-13747256	HCR1	H48	OK	59.1256	10.79	-2.7323	0.0028	0.0653184	no
XLOC_021261	XLOC_021261	LOC_Os02g39950	EF hand family protein, putative, expressed	-2.44763	Down Regulated	Chr2:24158476-24163116	HCR1	H48	OK	24.5533	4.5009	-2.80652	0.0078	0.120568	no
XLOC_048856	XLOC_048856	LOC_Os07g46790	4-alpha-glucanotransferase, putative, expressed	-2.43872	Down Regulated	Chr7:27960439-27968017	HCR1	H48	OK	87.0142	16.0495	-3.13708	0.00125	0.0387745	yes
XLOC_011648	XLOC_011648	LOC_Os11g22404	protein phosphatase 2C, putative, expressed	-2.43048	Down Regulated	Chr11:12855015-12861914	HCR1	H48	OK	9.0228	1.67377	-2.46782	0.00975	0.142997	no
XLOC_028086	XLOC_028086	LOC_Os03g02240	AT-GTL1, putative, expressed	-2.39471	Down Regulated	Chr3:744211-756732	HCR1	H48	OK	19.5716	3.72177	-2.73374	0.007	0.113799	no
XLOC_036070	XLOC_036070	LOC_Os04g51330	maltose excess protein 1-like, chloroplast precursor, putative, expressed	-2.38668	Down Regulated	Chr4:30395911-30402013	HCR1	H48	OK	68.0474	13.0122	-2.88584	0.002	0.0521034	no
XLOC_045680	XLOC_045680	LOC_Os06g36090	ABC-2 type transporter, putative, expressed	-2.38331	Down Regulated	Chr6:21113184-21126486	HCR1	H48	OK	23.2436	4.45508	-2.8099	0.0026	0.0617368	no
XLOC_017949	XLOC_017949	LOC_Os12g16200	glutathione synthetase, chloroplast precursor, putative, expressed	-2.3763	Down Regulated	Chr12:9263675-9270114	HCR1	H48	OK	17.0521	3.28429	-2.68721	0.00655	0.108474	no
XLOC_025363	XLOC_025363	LOC_Os03g04660	cytochrome P450 86A1, putative, expressed	-2.36981	Down Regulated	Chr3:2211806-2213941	HCR1	H48	OK	90.173	17.4459	-2.99952	0.00135	0.0399802	yes
XLOC_008633	XLOC_008633	LOC_Os10g40730	expansin precursor, putative, expressed	-2.36895	Down Regulated	Chr10:21858749-21861307	HCR1	H48	OK	196.672	38.0729	-2.83807	0.0019	0.050937	no
XLOC_049448	XLOC_049448	LOC_Os07g10770	CESA8 - cellulose synthase, expressed	-2.36571	Down Regulated	Chr7:5852710-5858718	HCR1	H48	OK	50.0929	9.71915	-2.78958	0.0028	0.0653184	no
XLOC_057399	XLOC_057399	LOC_Os09g37100	phospholipase D, putative, expressed	-2.36289	Down Regulated	Chr9:21391773-21397949	HCR1	H48	OK	42.0837	8.18113	-2.72636	0.00535	0.099416	no
XLOC_056961	XLOC_056961	LOC_Os09g26370	DUF581 domain containing protein, expressed	-2.36076	Down Regulated	Chr9:15927016-15928164	HCR1	H48	OK	75.9284	14.7824	-2.73541	0.0056	0.099416	no
XLOC_036119	XLOC_036119	LOC_Os04g52310	metal cation transporter, putative, expressed	-2.35925	Down Regulated	Chr4:31078199-31080558	HCR1	H48	OK	25.6945	5.00767	-2.68113	0.00455	0.0881355	no
XLOC_027409	XLOC_027409	LOC_Os03g50885	actin, putative, expressed	-2.34869	Down Regulated	Chr3:29073994-29075870	HCR1	H48	OK	366.678	71.9879	-2.88254	0.0035	0.0771319	no
XLOC_025788	XLOC_025788	LOC_Os03g13540	Ser/Thr protein phosphatase family protein, putative, expressed	-2.34845	Down Regulated	Chr3:7322124-7328866	HCR1	H48	OK	66.0224	12.964	-2.80632	0.0037	0.0771319	no
XLOC_037316	XLOC_037316	LOC_Os05g11950	GDSL-like lipase/acylhydrolase, putative, expressed	-2.34714	Down Regulated	Chr5:6824520-6827362	HCR1	H48	OK	61.6683	12.12	-2.75724	0.0052	0.0981886	no
XLOC_021590	XLOC_021590	LOC_Os02g47220	CPuORF20 - conserved peptide uORF-containing transcript, expressed	-2.34043	Down Regulated	Chr2:28820775-28826658	HCR1	H48	OK	112.951	22.3023	-2.75622	0.00285	0.0664318	no
XLOC_036397	XLOC_036397	LOC_Os04g57610	auxin response factor, putative, expressed	-2.31918	Down Regulated	Chr4:34278411-34285905	HCR1	H48	OK	59.6523	11.9532	-2.93984	0.00205	0.0533109	no
XLOC_006636	XLOC_006636	LOC_Os01g74450	aquaporin protein, putative, expressed	-2.31117	Down Regulated	Chr1:43115741-43117231	HCR1	H48	OK	109.29	22.0217	-2.82719	0.00305	0.0700877	no
XLOC_039271	XLOC_039271	LOC_Os05g04170	AMP-binding enzyme, putative, expressed	-2.30332	Down Regulated	Chr5:1866877-1874707	HCR1	H48	OK	47.3491	9.59274	-2.70137	0.00395	0.0784898	no
XLOC_017212	XLOC_017212	LOC_Os12g44150	plasma membrane ATPase, putative, expressed	-2.27935	Down Regulated	Chr12:27386952-27394090	HCR1	H48	OK	60.9937	12.5642	-2.87906	0.00215	0.0554184	no
XLOC_019476	XLOC_019476	LOC_Os02g01590	glycosyl hydrolases, putative, expressed	-2.27593	Down Regulated	Chr2:343056-354309	HCR1	H48	OK	172.201	35.5561	-2.59784	0.0039	0.0778137	no
XLOC_029214	XLOC_029214	LOC_Os03g27990	STRUBBELIG-RECEPTOR FAMILY 7 precursor, putative, expressed	-2.2635	Down Regulated	Chr3:16072831-16078897	HCR1	H48	OK	23.3164	4.85602	-2.72912	0.0042	0.0827264	no
XLOC_002581	XLOC_002581	LOC_Os01g57610	OsGH3.1 - Probable indole-3-acetic acid-amido synthetase, expressed	-2.26135	Down Regulated	Chr1:33308447-33311391	HCR1	H48	OK	33.1778	6.92011	-2.61927	0.007	0.113799	no
XLOC_040534	XLOC_040534	LOC_Os05g32110	COBRA, putative, expressed	-2.25236	Down Regulated	Chr5:18720598-18724913	HCR1	H48	OK	49.3372	10.3549	-2.63728	0.00495	0.0943826	no
XLOC_008370	XLOC_008370	LOC_Os10g35180	white-brown complex homolog protein 11, putative, expressed	-2.25046	Down Regulated	Chr10:18784684-18791044	HCR1	H48	OK	14.2714	2.99924	-2.60652	0.00875	0.131972	no
XLOC_032733	XLOC_032733	LOC_Os04g37600	phosphate carrier protein, mitochondrial precursor, putative, expressed	-2.24196	Down Regulated	Chr4:22362238-22367204	HCR1	H48	OK	50.7578	10.7302	-2.78093	0.00455	0.0881355	no
XLOC_023926	XLOC_023926	LOC_Os02g39380	OsCML17 - Calmodulin-related calcium sensor protein, expressed	-2.24054	Down Regulated	Chr2:23766604-23767449	HCR1	H48	OK	711.39	150.535	-2.53955	0.0075	0.117107	no
XLOC_016075	XLOC_016075	LOC_Os12g19470	ribulose bisphosphate carboxylase small chain, chloroplast precursor, putative, expressed	-2.23324	Down Regulated	Chr12:11320266-11322547	HCR1	H48	OK	318.984	67.8416	-2.39079	0.00955	0.140912	no
XLOC_024287	XLOC_024287	LOC_Os02g46460	peptide transporter PTR2, putative, expressed	-2.19862	Down Regulated	Chr2:28312588-28316198	HCR1	H48	OK	28.5007	6.20874	-2.41149	0.0079	0.12192	no
XLOC_030621	XLOC_030621	LOC_Os03g60350	leaf senescence related protein, putative, expressed	-2.19493	Down Regulated	Chr3:34320192-34325391	HCR1	H48	OK	19.3035	4.21598	-2.45327	0.0092	0.136853	no
XLOC_028113	XLOC_028113	LOC_Os03g02920	peroxidase precursor, putative, expressed	-2.18572	Down Regulated	Chr3:1172249-1176258	HCR1	H48	OK	56.7618	12.4764	-2.40124	0.008	0.122944	no
XLOC_021212	XLOC_021212	LOC_Os02g38970	expressed protein	-2.17005	Down Regulated	Chr2:23544804-23549147	HCR1	H48	OK	22.6191	5.02604	-2.39813	0.00965	0.142101	no
XLOC_046359	XLOC_046359	LOC_Os06g49890	coiled-coil domain-containing protein 90A, mitochondrial precursor, putative, expressed	-2.16791	Down Regulated	Chr6:30202969-30207141	HCR1	H48	OK	46.5322	10.3549	-2.58879	0.0055	0.099416	no
XLOC_021673	XLOC_021673	LOC_Os02g48900	aspartic proteinase nepenthesin-1 precursor, putative, expressed	-2.15426	Down Regulated	Chr2:29911309-29916317	HCR1	H48	OK	77.7156	17.4587	-2.71952	0.003	0.0692654	no
XLOC_046217	XLOC_046217	LOC_Os06g47000	external NADH-ubiquinone oxidoreductase 1, mitochondrial precursor, putative, expressed	-2.1468	Down Regulated	Chr6:28504137-28508822	HCR1	H48	OK	20.2854	4.58069	-2.56365	0.00695	0.113238	no
XLOC_005951	XLOC_005951	LOC_Os01g59900	expressed protein	-2.14338	Down Regulated	Chr1:34636150-34642998	HCR1	H48	OK	77.7775	17.6049	-2.80516	0.00165	0.0456719	yes
XLOC_024213	XLOC_024213	LOC_Os02g45130	protein kinase, putative, expressed	-2.12463	Down Regulated	Chr2:27372027-27376763	HCR1	H48	OK	36.5394	8.37886	-2.62574	0.0036	0.0771319	no
XLOC_035033	XLOC_035033	LOC_Os04g28420	peptidyl-prolyl isomerase, putative, expressed	-2.11422	Down Regulated	Chr4:16813847-16818154	HCR1	H48	OK	19.1145	4.41488	-2.35013	0.00815	0.12479	no
XLOC_002667	XLOC_002667	LOC_Os01g59150	tubulin/FtsZ domain containing protein, putative, expressed	-2.1013	Down Regulated	Chr1:34167932-34171810	HCR1	H48	OK	84.2226	19.6279	-2.61625	0.00155	0.0433555	yes
XLOC_023558	XLOC_023558	LOC_Os02g32060	hydrolase, NUDIX family, domain containing protein, expressed	-2.09711	Down Regulated	Chr2:18936316-18939517	HCR1	H48	OK	48.672	11.3759	-2.50015	0.00805	0.123453	no
XLOC_025739	XLOC_025739	LOC_Os03g12530	cation efflux family protein, putative, expressed	-2.09575	Down Regulated	Chr3:6636542-6642114	HCR1	H48	OK	40.3817	9.44715	-2.75282	0.00255	0.0608958	no
XLOC_040557	XLOC_040557	LOC_Os05g32710	Alpha amylase, catalytic domain containing protein, expressed	-2.09325	Down Regulated	Chr5:19154969-19157600	HCR1	H48	OK	27.8815	6.5341	-2.45181	0.00555	0.099416	no
XLOC_005417	XLOC_005417	LOC_Os01g47740	zinc finger, C3HC4 type domain containing protein, expressed	-2.09172	Down Regulated	Chr1:27303110-27312308	HCR1	H48	OK	93.2347	21.8729	-2.6248	0.00305	0.0700877	no
XLOC_053368	XLOC_053368	LOC_Os08g42640	zinc finger, C3HC4 type domain containing protein, expressed	-2.0878	Down Regulated	Chr8:26948530-26953515	HCR1	H48	OK	56.5268	13.2973	-2.74094	0.00535	0.099416	no
XLOC_035524	XLOC_035524	LOC_Os04g40150	glycosyl transferase family 17 protein, putative, expressed	-2.08536	Down Regulated	Chr4:23892682-23896476	HCR1	H48	OK	33.5876	7.91451	-2.63787	0.00455	0.0881355	no
XLOC_048098	XLOC_048098	LOC_Os07g31720	GTPase activating protein, putative, expressed	-2.08313	Down Regulated	Chr7:18840246-18842537	HCR1	H48	OK	135.514	31.9816	-2.66797	0.0051	0.0966751	no
XLOC_008438	XLOC_008438	LOC_Os10g36650	actin, putative, expressed	-2.08112	Down Regulated	Chr10:19606850-19610882	HCR1	H48	OK	49.5058	11.6997	-2.71775	0.0031	0.0709577	no
XLOC_028636	XLOC_028636	LOC_Os03g14730	gibberellin receptor GID1L2, putative, expressed	-2.07521	Down Regulated	Chr3:8010853-8012571	HCR1	H48	OK	27.7849	6.59337	-2.31665	0.0088	0.13259	no
XLOC_040515	XLOC_040515	LOC_Os05g31750	annexin, putative, expressed	-2.06274	Down Regulated	Chr5:18494330-18496597	HCR1	H48	OK	39.3968	9.43003	-2.51628	0.00715	0.115722	no
XLOC_036982	XLOC_036982	LOC_Os05g04380	peroxidase precursor, putative, expressed	-2.06216	Down Regulated	Chr5:2010114-2015088	HCR1	H48	OK	91.1863	21.8352	-2.50055	0.00655	0.108474	no
XLOC_033499	XLOC_033499	LOC_Os04g54600	DUF617 domain containing protein, expressed	-2.04554	Down Regulated	Chr4:32464932-32466074	HCR1	H48	OK	240.158	58.1739	-2.2933	0.00975	0.142997	no
XLOC_059265	XLOC_059265	LOC_Os09g39060	vignain precursor, putative, expressed	-2.01684	Down Regulated	Chr9:22420897-22422558	HCR1	H48	OK	92.3137	22.8106	-2.62284	0.004	0.0793216	no
XLOC_009752	XLOC_009752	LOC_Os10g25090	STRUBBELIG-RECEPTOR FAMILY 6 precursor, putative, expressed	-2.01546	Down Regulated	Chr10:12922957-12928465	HCR1	H48	OK	25.56	6.3219	-2.55253	0.00775	0.119922	no
XLOC_000160	XLOC_000160	LOC_Os01g04350	hsp20/alpha crystallin family protein, putative, expressed	-2.01282	Down Regulated	Chr1:1941002-1941953	HCR1	H48	OK	209.943	52.0214	-2.58436	0.00615	0.103551	no
XLOC_023752	XLOC_023752	LOC_Os02g35910	protein phosphotase protein, putative, expressed	-2.00182	Down Regulated	Chr2:21569210-21574268	HCR1	H48	OK	34.5897	8.63651	-2.58132	0.0053	0.099416	no
XLOC_038400	XLOC_038400	LOC_Os05g36360	U-box domain containing protein, expressed	2.00219	Up Regulated	Chr5:21525164-21526787	HCR1	H48	OK	38.9641	156.093	2.50955	0.009	0.134839	no
XLOC_035697	XLOC_035697	LOC_Os04g43650	L-allo-threonine aldolase, putative, expressed	2.00283	Up Regulated	Chr4:25826664-25830703	HCR1	H48	OK	15.1957	60.9024	2.58395	0.0034	0.0764477	no
XLOC_019207	XLOC_019207	LOC_Os12g43440	thaumatin, putative, expressed	2.00372	Up Regulated	Chr12:26956141-26956894	HCR1	H48	OK	86.7527	347.908	2.44824	0.0074	0.116042	no
XLOC_017112	XLOC_017112	LOC_Os12g41930	SRP40, C-terminal domain containing protein, expressed	2.00742	Up Regulated	Chr12:25990055-25993360	HCR1	H48	OK	11.2153	45.0926	2.51744	0.00865	0.131073	no
XLOC_053009	XLOC_053009	LOC_Os08g35190	auxin-repressed protein, putative, expressed	2.01466	Up Regulated	Chr8:22190135-22191839	HCR1	H48	OK	65.564	264.934	2.59132	0.00465	0.0898938	no
XLOC_044226	XLOC_044226	LOC_Os06g05160	sulfate transporter, putative, expressed	2.02099	Up Regulated	Chr6:2292594-2298805	HCR1	H48	OK	46.6804	189.458	2.41376	0.0087	0.131422	no
XLOC_003732	XLOC_003732	LOC_Os01g07970	expressed protein	2.02112	Up Regulated	Chr1:3855045-3856060	HCR1	H48	OK	62.9856	255.658	2.41989	0.0071	0.115168	no
XLOC_028776	XLOC_028776	LOC_Os03g17700	CGMC_MAPKCGMC_2_ERK.2 - CGMC includes CDA, MAPK, GSK3, and CLKC kinases, expressed	2.02172	Up Regulated	Chr3:9847699-9850473	HCR1	H48	OK	13.0375	52.9411	2.45427	0.00925	0.137387	no
XLOC_032661	XLOC_032661	LOC_Os04g35140	OsSub41 - Putative Subtilisin homologue, expressed	2.02263	Up Regulated	Chr4:21358548-21365586	HCR1	H48	OK	13.0493	53.0223	2.53926	0.0068	0.111415	no
XLOC_033430	XLOC_033430	LOC_Os04g53210	hydroxyacid oxidase 1, putative, expressed	2.02288	Up Regulated	Chr4:31688716-31692592	HCR1	H48	OK	24.7155	100.442	2.60553	0.00385	0.0771319	no
XLOC_045382	XLOC_045382	LOC_Os06g30480	expressed protein	2.02775	Up Regulated	Chr6:17617356-17618966	HCR1	H48	OK	22.8349	93.1135	2.33614	0.0093	0.137849	no
XLOC_050413	XLOC_050413	LOC_Os07g32570	OsAPRL1 adenosine 5'-phosphosulfate reductase-like OsAPRL1, expressed	2.03061	Up Regulated	Chr7:19409952-19413299	HCR1	H48	OK	26.5923	108.65	2.70056	0.00275	0.0645643	no
XLOC_047127	XLOC_047127	LOC_Os07g10420	expressed protein	2.03143	Up Regulated	Chr7:5598637-5600789	HCR1	H48	OK	58.9383	240.945	2.45255	0.00895	0.134227	no
XLOC_033211	XLOC_033211	LOC_Os04g48270	OsFBX148 - F-box domain containing protein, expressed	2.04947	Up Regulated	Chr4:28751050-28754411	HCR1	H48	OK	17.2573	71.4371	2.75275	0.00525	0.0988773	no
XLOC_046249	XLOC_046249	LOC_Os06g47640	OsCML29 - Calmodulin-related calcium sensor protein, expressed	2.05198	Up Regulated	Chr6:28847256-28848022	HCR1	H48	OK	129.67	537.708	2.54053	0.0066	0.108993	no
XLOC_040446	XLOC_040446	LOC_Os05g30400	expressed protein	2.05463	Up Regulated	Chr5:17621437-17623499	HCR1	H48	OK	19.163	79.6102	2.38658	0.00945	0.139789	no
XLOC_027613	XLOC_027613	LOC_Os03g55590	MYB family transcription factor, putative, expressed	2.05698	Up Regulated	Chr3:31643336-31646161	HCR1	H48	OK	31.5243	131.177	2.73448	0.00355	0.0771319	no
XLOC_035819	XLOC_035819	LOC_Os04g46220	ethylene-responsive transcription factor, putative, expressed	2.0609	Up Regulated	Chr4:27370861-27373629	HCR1	H48	OK	15.1325	63.1397	2.72245	0.00305	0.0700877	no
XLOC_036481	XLOC_036481	LOC_Os04g59190	peroxidase precursor, putative, expressed	2.06524	Up Regulated	Chr4:35207043-35208653	HCR1	H48	OK	20.9796	87.8007	2.44703	0.0043	0.0840729	no
XLOC_032934	XLOC_032934	LOC_Os04g42020	CCT/B-box zinc finger protein, putative, expressed	2.07038	Up Regulated	Chr4:24889982-24891487	HCR1	H48	OK	63.7686	267.826	2.4993	0.00555	0.099416	no
XLOC_004780	XLOC_004780	LOC_Os01g33050	ribosomal protein L24, putative, expressed	2.07341	Up Regulated	Chr1:18158640-18163549	HCR1	H48	OK	27.6788	116.495	2.63524	0.00395	0.0784898	no
XLOC_008005	XLOC_008005	LOC_Os10g26540	expressed protein	2.0802	Up Regulated	Chr10:13833332-13836254	HCR1	H48	OK	36.375	153.817	2.46779	0.00525	0.0988773	no
XLOC_003309	XLOC_003309	LOC_Os01g73170	peroxidase precursor, putative, expressed	2.08054	Up Regulated	Chr1:42429501-42432618	HCR1	H48	OK	37.9961	160.711	2.66342	0.00515	0.0974333	no
XLOC_048169	XLOC_048169	LOC_Os07g33240	endoribonuclease, putative, expressed	2.0819	Up Regulated	Chr7:19861608-19864543	HCR1	H48	OK	16.6244	70.3818	2.45315	0.00755	0.117574	no
XLOC_030384	XLOC_030384	LOC_Os03g55540	ZOS3-18 - C2H2 zinc finger protein, expressed	2.0833	Up Regulated	Chr3:31604951-31606236	HCR1	H48	OK	18.8645	79.9434	2.57039	0.00675	0.110782	no
XLOC_033283	XLOC_033283	LOC_Os04g49757	purine permease, putative, expressed	2.09074	Up Regulated	Chr4:29666139-29672637	HCR1	H48	OK	29.6152	126.15	2.71055	0.00245	0.0590383	no
XLOC_056146	XLOC_056146	LOC_Os09g08072	glycosyl hydrolases, putative, expressed	2.09152	Up Regulated	Chr9:4164773-4198627	HCR1	H48	OK	21.9639	93.6092	2.63288	0.0054	0.099416	no
XLOC_015584	XLOC_015584	LOC_Os12g09300	amino acid transporter, putative, expressed	2.09411	Up Regulated	Chr12:4881028-4884888	HCR1	H48	OK	22.8268	97.4619	2.66925	0.0031	0.0709577	no
XLOC_022825	XLOC_022825	LOC_Os02g15540	expressed protein	2.10267	Up Regulated	Chr2:8714094-8715055	HCR1	H48	OK	35.7415	153.511	2.49388	0.00795	0.122304	no
XLOC_008742	XLOC_008742	LOC_Os10g01134	OsSCP46 - Putative Serine Carboxypeptidase homologue, expressed	2.10416	Up Regulated	Chr10:110137-116454	HCR1	H48	OK	56.6455	243.546	2.84457	0.00125	0.0387745	yes
XLOC_042845	XLOC_042845	LOC_Os06g27560	glycosyltransferase protein, putative, expressed	2.10665	Up Regulated	Chr6:15601590-15603932	HCR1	H48	OK	23.7296	102.201	2.81272	0.00255	0.0608958	no
XLOC_043463	XLOC_043463	LOC_Os06g40440	expressed protein	2.10875	Up Regulated	Chr6:24089902-24091217	HCR1	H48	OK	33.3627	143.899	2.61317	0.00685	0.111983	no
XLOC_024701	XLOC_024701	LOC_Os02g54600	STE_MEK_ste7_MAP2K.5 - STE kinases include homologs to sterile 7, sterile 11 and sterile 20 from yeast, expressed	2.1095	Up Regulated	Chr2:33442068-33443948	HCR1	H48	OK	21.0115	90.6735	2.73812	0.0033	0.0746009	no
XLOC_051067	XLOC_051067	LOC_Os07g47340	expressed protein	2.11768	Up Regulated	Chr7:28308422-28311606	HCR1	H48	OK	15.9221	69.1013	2.49054	0.0073	0.116042	no
XLOC_043242	XLOC_043242	LOC_Os06g36180	amino acid transporter, putative, expressed	2.12171	Up Regulated	Chr6:21184899-21192189	HCR1	H48	OK	21.092	91.7947	2.80494	0.0026	0.0617368	no
XLOC_048459	XLOC_048459	LOC_Os07g39350	transporter family protein, putative, expressed	2.12408	Up Regulated	Chr7:23582064-23584548	HCR1	H48	OK	40.2462	175.443	2.76098	0.00475	0.0914641	no
XLOC_030094	XLOC_030094	LOC_Os03g48430	1-aminocyclopropane-1-carboxylate oxidase homolog 4, putative, expressed	2.12864	Up Regulated	Chr3:27580908-27582212	HCR1	H48	OK	24.7534	108.248	2.59799	0.00655	0.108474	no
XLOC_027379	XLOC_027379	LOC_Os03g50310	CCT/B-box zinc finger protein, putative, expressed	2.13848	Up Regulated	Chr3:28686957-28689716	HCR1	H48	OK	22.5863	99.4469	2.59158	0.0061	0.102828	no
XLOC_036432	XLOC_036432	LOC_Os04g58280	stem-specific protein TSJT1, putative, expressed	2.13933	Up Regulated	Chr4:34694303-34697202	HCR1	H48	OK	136.865	602.97	2.46099	0.00695	0.113238	no
XLOC_043953	XLOC_043953	LOC_Os06g50230	expressed protein	2.14198	Up Regulated	Chr6:30417656-30418845	HCR1	H48	OK	50.1396	221.299	2.73269	0.0032	0.0727341	no
XLOC_024453	XLOC_024453	LOC_Os02g49720	aldehyde dehydrogenase, putative, expressed	2.14473	Up Regulated	Chr2:30392546-30396955	HCR1	H48	OK	74.2151	328.187	2.60743	0.00325	0.0736415	no
XLOC_024747	XLOC_024747	LOC_Os02g55610	serine-rich protein, putative, expressed	2.14568	Up Regulated	Chr2:34058138-34059033	HCR1	H48	OK	49.121	217.36	2.49139	0.00795	0.122304	no
XLOC_021672	XLOC_021672	LOC_Os02g48860	aspartic proteinase nepenthesin-2 precursor, putative, expressed	2.14773	Up Regulated	Chr2:29889085-29891665	HCR1	H48	OK	12.7156	56.3465	2.52561	0.00655	0.108474	no
XLOC_021238	XLOC_021238	LOC_Os02g39400	isochorismatase family protein, putative, expressed	2.14959	Up Regulated	Chr2:23773106-23775668	HCR1	H48	OK	10.7432	47.6676	2.54098	0.0065	0.107952	no
XLOC_015560	XLOC_015560	LOC_Os12g08760	carboxyvinyl-carboxyphosphonate phosphorylmutase, putative, expressed	2.15382	Up Regulated	Chr12:4499735-4503990	HCR1	H48	OK	30.4031	135.295	2.32036	0.00905	0.135379	no
XLOC_006123	XLOC_006123	LOC_Os01g63410	expressed protein	2.15974	Up Regulated	Chr1:36732762-36737747	HCR1	H48	OK	21.0636	94.1193	2.51333	0.00775	0.119922	no
XLOC_030643	XLOC_030643	LOC_Os03g60840	BBTI13 - Bowman-Birk type bran trypsin inhibitor precursor, expressed	2.1651	Up Regulated	Chr3:34566987-34568087	HCR1	H48	OK	23.5188	105.482	2.54744	0.0077	0.119464	no
XLOC_009766	XLOC_009766	LOC_Os10g25290	ZIM domain containing protein, putative, expressed	2.1683	Up Regulated	Chr10:13069728-13070894	HCR1	H48	OK	22.552	101.37	2.56849	0.0064	0.106655	no
XLOC_028403	XLOC_028403	LOC_Os03g09250	inositol-3-phosphate synthase, putative, expressed	2.17142	Up Regulated	Chr3:4825615-4829747	HCR1	H48	OK	7.59125	34.1961	2.41741	0.007	0.113799	no
XLOC_046800	XLOC_046800	LOC_Os07g03770	Homeobox domain containing protein, expressed	2.18135	Up Regulated	Chr7:1566063-1572187	HCR1	H48	OK	31.7261	143.903	2.85254	0.00395	0.0784898	no
XLOC_031156	XLOC_031156	LOC_Os04g01810	terpene synthase, putative, expressed	2.19002	Up Regulated	Chr4:517640-524527	HCR1	H48	OK	22.0787	100.747	2.49749	0.0061	0.102828	no
XLOC_042116	XLOC_042116	LOC_Os06g10520	pantothenate kinase, putative, expressed	2.19837	Up Regulated	Chr6:5420907-5427254	HCR1	H48	OK	10.8653	49.8673	2.94707	0.0021	0.0541774	no
XLOC_057083	XLOC_057083	LOC_Os09g28630	gibberellin receptor, putative, expressed	2.20063	Up Regulated	Chr9:17417334-17418477	HCR1	H48	OK	31.7647	146.016	2.53445	0.0076	0.118227	no
XLOC_026508	XLOC_026508	LOC_Os03g29190	PDI, putative, expressed	2.20077	Up Regulated	Chr3:16590186-16595991	HCR1	H48	OK	11.5591	53.1401	2.8439	0.00155	0.0433555	yes
XLOC_055544	XLOC_055544	LOC_Os08g43550	MYB family transcription factor, putative, expressed	2.20094	Up Regulated	Chr8:27547970-27549173	HCR1	H48	OK	49.8341	229.127	2.95195	0.00245	0.0590383	no
XLOC_028090	XLOC_028090	LOC_Os03g02330	AAA-type ATPase family protein, putative, expressed	2.2036	Up Regulated	Chr3:812821-814725	HCR1	H48	OK	9.62893	44.3534	2.51425	0.0076	0.118227	no
XLOC_038328	XLOC_038328	LOC_Os05g34830	No apical meristem protein, putative, expressed	2.20758	Up Regulated	Chr5:20678000-20680343	HCR1	H48	OK	25.1811	116.312	2.82603	0.0025	0.0599467	no
XLOC_028519	XLOC_028519	LOC_Os03g12290	glutamine synthetase, catalytic domain containing protein, expressed	2.21173	Up Regulated	Chr3:6457909-6462727	HCR1	H48	OK	20.9244	96.9281	2.81334	0.00315	0.071821	no
XLOC_028365	XLOC_028365	LOC_Os03g08470	AP2 domain containing protein, expressed	2.21245	Up Regulated	Chr3:4348669-4350541	HCR1	H48	OK	85.7507	397.422	2.60816	0.0054	0.099416	no
XLOC_026435	XLOC_026435	LOC_Os03g27080	calmodulin-binding transcription activator 2, putative, expressed	2.21624	Up Regulated	Chr3:15498585-15507731	HCR1	H48	OK	22.8269	106.072	2.44296	0.0075	0.117107	no
XLOC_016491	XLOC_016491	LOC_Os12g29330	no apical meristem protein, putative, expressed	2.21922	Up Regulated	Chr12:17390972-17394159	HCR1	H48	OK	17.0089	79.2006	2.58888	0.00365	0.0771319	no
XLOC_009748	XLOC_009748	LOC_Os10g25030	red chlorophyll catabolite reductase, putative, expressed	2.22411	Up Regulated	Chr10:12886330-12888302	HCR1	H48	OK	24.7359	115.572	2.71446	0.00555	0.099416	no
XLOC_000631	XLOC_000631	LOC_Os01g14440	WRKY1, expressed	2.22527	Up Regulated	Chr1:8083913-8087044	HCR1	H48	OK	19.9459	93.2667	2.94923	0.00105	0.0341017	yes
XLOC_005029	XLOC_005029	LOC_Os01g38660	expressed protein	2.22669	Up Regulated	Chr1:21715299-21716831	HCR1	H48	OK	14.3408	67.1235	2.42662	0.0089	0.133683	no
XLOC_005614	XLOC_005614	LOC_Os01g52230	phosphoethanolamine/phosphocholine phosphatase, putative, expressed	2.22764	Up Regulated	Chr1:30025248-30026465	HCR1	H48	OK	15.4465	72.3462	2.48702	0.00945	0.139789	no
XLOC_038915	XLOC_038915	LOC_Os05g47650	B3 DNA binding domain containing protein, expressed	2.23069	Up Regulated	Chr5:27302984-27304597	HCR1	H48	OK	14.9125	69.993	2.59929	0.00495	0.0943826	no
XLOC_040970	XLOC_040970	LOC_Os05g41220	SNF1-related protein kinase regulatory subunit beta-1, putative, expressed	2.23834	Up Regulated	Chr5:24137574-24141002	HCR1	H48	OK	31.419	148.252	2.73503	0.00185	0.0503966	no
XLOC_024195	XLOC_024195	LOC_Os02g44820	rho-GTPase-activating protein-related, putative, expressed	2.24566	Up Regulated	Chr2:27137203-27138314	HCR1	H48	OK	73.7992	349.996	2.87815	0.0032	0.0727341	no
XLOC_028189	XLOC_028189	LOC_Os03g04570	peptide transporter PTR3-A, putative, expressed	2.24691	Up Regulated	Chr3:2131971-2136725	HCR1	H48	OK	7.9602	37.7842	2.49098	0.0061	0.102828	no
XLOC_000432	XLOC_000432	LOC_Os01g10070	expressed protein	2.24708	Up Regulated	Chr1:5256286-5262898	HCR1	H48	OK	10.2597	48.7048	2.5124	0.00625	0.104572	no
XLOC_000432	XLOC_000432	LOC_Os01g10080	expressed protein	2.24708	Up Regulated	Chr1:5256286-5262898	HCR1	H48	OK	10.2597	48.7048	2.5124	0.00625	0.104572	no
XLOC_021629	XLOC_021629	LOC_Os02g48080	cysteine-rich receptor-like protein kinase 7 precursor, putative, expressed	2.25094	Up Regulated	Chr2:29429382-29432460	HCR1	H48	OK	8.74108	41.6071	2.65175	0.00585	0.099416	no
XLOC_033061	XLOC_033061	LOC_Os04g44910	receptor like protein kinase, putative, expressed	2.25543	Up Regulated	Chr4:26576091-26578766	HCR1	H48	OK	15.7064	74.9947	2.8989	0.003	0.0692654	no
XLOC_010046	XLOC_010046	LOC_Os10g31850	RING finger and CHY zinc finger domain-containing protein 1, putative, expressed	2.26124	Up Regulated	Chr10:16704855-16708495	HCR1	H48	OK	39.5849	189.771	3.09782	0.0028	0.0653184	no
XLOC_037039	XLOC_037039	LOC_Os05g05680	1-aminocyclopropane-1-carboxylate oxidase, putative, expressed	2.26292	Up Regulated	Chr5:2825322-2826992	HCR1	H48	OK	40.7247	195.463	2.7185	0.00315	0.071821	no
XLOC_028814	XLOC_028814	LOC_Os03g18560	DUF538 domain containing protein, putative, expressed	2.26296	Up Regulated	Chr3:10391656-10392766	HCR1	H48	OK	12.9247	62.0354	2.57124	0.0084	0.128015	no
XLOC_024291	XLOC_024291	LOC_Os02g46610	zinc-binding protein, putative, expressed	2.27768	Up Regulated	Chr2:28435056-28436702	HCR1	H48	OK	67.0233	324.994	2.89611	0.0022	0.0561646	no
XLOC_013348	XLOC_013348	LOC_Os11g10520	dehydrogenase, putative, expressed	2.2824	Up Regulated	Chr11:5755643-5760093	HCR1	H48	OK	78.1618	380.246	2.39701	0.00755	0.117574	no
XLOC_048338	XLOC_048338	LOC_Os07g36800	UPF0041 domain containing protein, putative, expressed	2.28334	Up Regulated	Chr7:22045993-22048316	HCR1	H48	OK	20.785	101.182	2.71847	0.00425	0.0835986	no
XLOC_028579	XLOC_028579	LOC_Os03g13600	ZOS3-07 - C2H2 zinc finger protein, expressed	2.29558	Up Regulated	Chr3:7353031-7356350	HCR1	H48	OK	16.1235	79.1587	2.5595	0.0069	0.112611	no
XLOC_007039	XLOC_007039	LOC_Os10g02380	oxidoreductase, aldo/keto reductase family protein, putative, expressed	2.30545	Up Regulated	Chr10:866368-870978	HCR1	H48	OK	9.72281	48.062	2.58707	0.0044	0.0856842	no
XLOC_055310	XLOC_055310	LOC_Os08g39090	coiled-coil domain containing 49, putative, expressed	2.30909	Up Regulated	Chr8:24695686-24698899	HCR1	H48	OK	18.8152	93.2425	2.93708	0.0039	0.0778137	no
XLOC_048889	XLOC_048889	LOC_Os07g47400	SRC2 protein, putative, expressed	2.31033	Up Regulated	Chr7:28344132-28345412	HCR1	H48	OK	25.0677	124.335	2.57513	0.00405	0.0800416	no
XLOC_008653	XLOC_008653	LOC_Os10g41230	homeobox associated leucine zipper, putative, expressed	2.31111	Up Regulated	Chr10:22152630-22154163	HCR1	H48	OK	10.0333	49.7919	2.48613	0.0061	0.102828	no
XLOC_002595	XLOC_002595	LOC_Os01g57854	pectinesterase, putative, expressed	2.31381	Up Regulated	Chr1:33453432-33460087	HCR1	H48	OK	7.82876	38.9242	2.49331	0.0066	0.108993	no
XLOC_036412	XLOC_036412	LOC_Os04g57850	AMP-binding enzyme, putative, expressed	2.31629	Up Regulated	Chr4:34444629-34447048	HCR1	H48	OK	9.1102	45.3733	2.72931	0.00245	0.0590383	no
XLOC_050880	XLOC_050880	LOC_Os07g43020	TRM112, putative, expressed	2.32575	Up Regulated	Chr7:25774435-25775340	HCR1	H48	OK	40.0965	201.015	2.82733	0.00325	0.0736415	no
XLOC_028539	XLOC_028539	LOC_Os03g12790	MATE efflux family protein, putative, expressed	2.33541	Up Regulated	Chr3:6853790-6856384	HCR1	H48	OK	6.66182	33.6218	2.63275	0.00575	0.099416	no
XLOC_028848	XLOC_028848	LOC_Os03g19250	AMP-binding enzyme, putative, expressed	2.34184	Up Regulated	Chr3:10824052-10827491	HCR1	H48	OK	68.8388	348.978	2.85151	0.00375	0.0771319	no
XLOC_021254	XLOC_021254	LOC_Os02g39710	CCT/B-box zinc finger protein, putative, expressed	2.34904	Up Regulated	Chr2:23989749-23991293	HCR1	H48	OK	31.5223	160.601	2.84752	0.0014	0.0409502	yes
XLOC_036316	XLOC_036316	LOC_Os04g56100	one cut domain family member 3, putative, expressed	2.34938	Up Regulated	Chr4:33415313-33416123	HCR1	H48	OK	48.0296	244.761	2.4798	0.00615	0.103551	no
XLOC_027640	XLOC_027640	LOC_Os03g56160	lectin-like receptor kinase 7, putative, expressed	2.35322	Up Regulated	Chr3:32008399-32010843	HCR1	H48	OK	5.78962	29.5829	2.82857	0.00265	0.0627202	no
XLOC_002307	XLOC_002307	LOC_Os01g51870	methyltransferase, putative, expressed	2.35548	Up Regulated	Chr1:29820399-29822195	HCR1	H48	OK	23.1101	118.27	2.78544	0.0031	0.0709577	no
XLOC_032113	XLOC_032113	LOC_Os04g24140	ribose-5-phosphate isomerase A, putative, expressed	2.35819	Up Regulated	Chr4:13802275-13803543	HCR1	H48	OK	62.7904	321.943	3.17287	0.0024	0.0580248	no
XLOC_028921	XLOC_028921	LOC_Os03g21060	No apical meristem protein, putative, expressed	2.35909	Up Regulated	Chr3:11973969-11976426	HCR1	H48	OK	9.74726	50.0079	2.75858	0.00335	0.0755559	no
XLOC_015540	XLOC_015540	LOC_Os12g08260	dehydrogenase E1 component domain containing protein, expressed	2.35984	Up Regulated	Chr12:4209129-4216353	HCR1	H48	OK	63.9554	328.292	2.66123	0.00445	0.0866002	no
XLOC_015249	XLOC_015249	LOC_Os12g02330	LTPL13 - Protease inhibitor/seed storage/LTP family protein precursor, expressed	2.36543	Up Regulated	Chr12:746154-747300	HCR1	H48	OK	88.8294	457.744	2.54744	0.0066	0.108993	no
XLOC_036966	XLOC_036966	LOC_Os05g03960	expressed protein	2.3676	Up Regulated	Chr5:1781508-1797051	HCR1	H48	OK	14.4035	74.3336	2.69483	0.00325	0.0736415	no
XLOC_036966	XLOC_036966	LOC_Os05g04000	expressed protein	2.3676	Up Regulated	Chr5:1781508-1797051	HCR1	H48	OK	14.4035	74.3336	2.69483	0.00325	0.0736415	no
XLOC_024398	XLOC_024398	LOC_Os02g48640	expressed protein	2.36812	Up Regulated	Chr2:29786181-29789844	HCR1	H48	OK	24.8714	128.403	2.94992	0.0027	0.0635947	no
XLOC_003804	XLOC_003804	LOC_Os01g09590	myb-like DNA-binding domain containing protein, putative, expressed	2.3716	Up Regulated	Chr1:4917883-4919224	HCR1	H48	OK	22.5549	116.725	2.88522	0.0028	0.0653184	no
XLOC_025222	XLOC_025222	LOC_Os03g01880	possible lysine decarboxylase domain containing protein, expressed	2.37606	Up Regulated	Chr3:537608-542771	HCR1	H48	OK	67.7816	351.865	2.98524	0.0011	0.0352169	yes
XLOC_024757	XLOC_024757	LOC_Os02g55890	inorganic H+ pyrophosphatase, putative, expressed	2.37612	Up Regulated	Chr2:34210399-34215008	HCR1	H48	OK	4.10784	21.3253	2.62815	0.00665	0.109757	no
XLOC_057351	XLOC_057351	LOC_Os09g36080	cytochrome P450, putative, expressed	2.38355	Up Regulated	Chr9:20774256-20776927	HCR1	H48	OK	13.8046	72.035	2.86539	0.0021	0.0541774	no
XLOC_006051	XLOC_006051	LOC_Os01g61990	ankyrin repeat-containing protein, putative, expressed	2.38516	Up Regulated	Chr1:35880498-35889014	HCR1	H48	OK	3.59955	18.8041	2.68745	0.00415	0.0818519	no
XLOC_012840	XLOC_012840	LOC_Os11g47809	metallothionein, putative, expressed	2.38969	Up Regulated	Chr11:28827675-28828513	HCR1	H48	OK	138.147	723.953	2.68808	0.00705	0.114421	no
XLOC_002842	XLOC_002842	LOC_Os01g62610	peptidyl-prolyl cis-trans isomerase, FKBP-type, putative, expressed	2.39077	Up Regulated	Chr1:36253546-36257218	HCR1	H48	OK	9.75585	51.1633	2.81754	0.0024	0.0580248	no
XLOC_041317	XLOC_041317	LOC_Os05g50090	oxidoreductase, 2OG-FeII oxygenase domain containing protein, putative, expressed	2.39117	Up Regulated	Chr5:28705366-28708556	HCR1	H48	OK	16.184	84.8985	2.31136	0.00495	0.0943826	no
XLOC_021868	XLOC_021868	LOC_Os02g52770	expressed protein	2.39546	Up Regulated	Chr2:32273866-32275255	HCR1	H48	OK	83.1736	437.613	2.84997	0.00625	0.104572	no
XLOC_003880	XLOC_003880	LOC_Os01g11160	amino acid permease family protein, putative, expressed	2.40585	Up Regulated	Chr1:5983580-5985875	HCR1	H48	OK	16.4499	87.176	2.91669	0.0025	0.0599467	no
XLOC_029961	XLOC_029961	LOC_Os03g45720	glyoxalase family protein, putative, expressed	2.40859	Up Regulated	Chr3:25801613-25804500	HCR1	H48	OK	41.5539	220.633	2.54889	0.00505	0.0959763	no
XLOC_005434	XLOC_005434	LOC_Os01g48000	S-locus-like receptor protein kinase, putative, expressed	2.41431	Up Regulated	Chr1:27474004-27476806	HCR1	H48	OK	3.89286	20.7515	2.74215	0.00545	0.099416	no
XLOC_025918	XLOC_025918	LOC_Os03g16350	DNA binding protein, putative, expressed	2.41771	Up Regulated	Chr3:9022589-9023976	HCR1	H48	OK	8.86584	47.3721	2.67075	0.0043	0.0840729	no
XLOC_008552	XLOC_008552	LOC_Os10g39140	flavonol synthase/flavanone 3-hydroxylase, putative, expressed	2.42483	Up Regulated	Chr10:20886351-20892217	HCR1	H48	OK	17.4432	93.6642	3.15583	0.00085	0.0291957	yes
XLOC_022276	XLOC_022276	LOC_Os02g03020	EF hand family protein, putative, expressed	2.43297	Up Regulated	Chr2:1187086-1187942	HCR1	H48	OK	41.0095	221.453	2.66746	0.0038	0.0771319	no
XLOC_045170	XLOC_045170	LOC_Os06g24990	xylanase inhibitor protein 1 precursor, putative, expressed	2.44081	Up Regulated	Chr6:14641575-14642575	HCR1	H48	OK	25.5231	138.577	2.74272	0.005	0.0952117	no
XLOC_043254	XLOC_043254	LOC_Os06g36390	expressed protein	2.44229	Up Regulated	Chr6:21372362-21377313	HCR1	H48	OK	14.5755	79.2179	2.50406	0.0089	0.133683	no
XLOC_037996	XLOC_037996	LOC_Os05g27730	WRKY53, expressed	2.4423	Up Regulated	Chr5:16150265-16152747	HCR1	H48	OK	47.8134	259.869	3.17764	0.0014	0.0409502	yes
XLOC_002652	XLOC_002652	LOC_Os01g58890	cysteine proteinase inhibitor precursor protein, putative, expressed	2.44449	Up Regulated	Chr1:34033155-34034940	HCR1	H48	OK	181.033	985.42	2.59949	0.00965	0.1421	no
XLOC_055511	XLOC_055511	LOC_Os08g42910	peptidase, M24 family protein, putative, expressed	2.44683	Up Regulated	Chr8:27123638-27127561	HCR1	H48	OK	2.61334	14.2484	2.73343	0.006	0.101434	no
XLOC_001987	XLOC_001987	LOC_Os01g45640	tat pathway signal sequence family protein, expressed	2.44711	Up Regulated	Chr1:25926235-25928209	HCR1	H48	OK	49.4799	269.826	2.98848	0.0025	0.0599467	no
XLOC_013197	XLOC_013197	LOC_Os11g07600	ABC-2 type transporter domain containing protein, expressed	2.46582	Up Regulated	Chr11:3853545-3857282	HCR1	H48	OK	24.1195	133.246	3.15639	0.00095	0.0318081	yes
XLOC_048922	XLOC_048922	LOC_Os07g48020	peroxidase precursor, putative, expressed	2.47514	Up Regulated	Chr7:28673753-28685897	HCR1	H48	OK	24.8761	138.316	2.96981	0.0024	0.0580248	no
XLOC_048922	XLOC_048922	LOC_Os07g48040	peroxidase precursor, putative, expressed	2.47514	Up Regulated	Chr7:28673753-28685897	HCR1	H48	OK	24.8761	138.316	2.96981	0.0024	0.0580248	no
XLOC_050196	XLOC_050196	LOC_Os07g27780	aminotransferase, putative, expressed	2.48103	Up Regulated	Chr7:16207173-16211263	HCR1	H48	OK	42.1877	235.533	3.15555	0.00185	0.0503966	no
XLOC_033471	XLOC_033471	LOC_Os04g53930	organic cation transporter protein, putative, expressed	2.49064	Up Regulated	Chr4:32137817-32141183	HCR1	H48	OK	4.5234	25.4227	2.52522	0.00875	0.131972	no
XLOC_025436	XLOC_025436	LOC_Os03g05920	expressed protein	2.49782	Up Regulated	Chr3:2964616-2967973	HCR1	H48	OK	11.3795	64.2749	2.99735	0.0021	0.0541774	no
XLOC_025436	XLOC_025436	LOC_Os03g05930	retrotransposon protein, putative, unclassified, expressed	2.49782	Up Regulated	Chr3:2964616-2967973	HCR1	H48	OK	11.3795	64.2749	2.99735	0.0021	0.0541774	no
XLOC_026151	XLOC_026151	LOC_Os03g20780	ethylene-insensitive 3, putative, expressed	2.50097	Up Regulated	Chr3:11769204-11778394	HCR1	H48	OK	19.8692	112.473	2.73747	0.0034	0.0764477	no
XLOC_026151	XLOC_026151	LOC_Os03g20790	ethylene-insensitive 3, putative, expressed	2.50097	Up Regulated	Chr3:11769204-11778394	HCR1	H48	OK	19.8692	112.473	2.73747	0.0034	0.0764477	no
XLOC_035750	XLOC_035750	LOC_Os04g44900	lectin-like receptor kinase, putative, expressed	2.50336	Up Regulated	Chr4:26572699-26575257	HCR1	H48	OK	9.69954	54.9968	3.00944	0.00245	0.0590383	no
XLOC_041761	XLOC_041761	LOC_Os06g03520	DUF581 domain containing protein, expressed	2.51995	Up Regulated	Chr6:1361363-1362509	HCR1	H48	OK	16.1679	92.733	2.8662	0.0044	0.0856842	no
XLOC_012843	XLOC_012843	LOC_Os11g47870	GRAS family transcription factor domain containing protein, expressed	2.52796	Up Regulated	Chr11:28870095-28872571	HCR1	H48	OK	1.98313	11.4378	2.41468	0.00735	0.116042	no
XLOC_038251	XLOC_038251	LOC_Os05g33400	basic 7S globulin precursor, putative, expressed	2.53046	Up Regulated	Chr5:19631807-19647398	HCR1	H48	OK	5.9928	34.6238	2.46562	0.00965	0.1421	no
XLOC_038251	XLOC_038251	LOC_Os05g33430	xyloglucanase inhibitor, putative, expressed	2.53046	Up Regulated	Chr5:19631807-19647398	HCR1	H48	OK	5.9928	34.6238	2.46562	0.00965	0.1421	no
XLOC_037994	XLOC_037994	LOC_Os05g27660	expressed protein	2.53075	Up Regulated	Chr5:16107805-16112248	HCR1	H48	OK	14.6814	84.8398	3.03657	0.0013	0.0387745	yes
XLOC_053596	XLOC_053596	LOC_Os08g02700	fructose-bisphospate aldolase isozyme, putative, expressed	2.53307	Up Regulated	Chr8:1127881-1129553	HCR1	H48	OK	15.0529	87.1266	2.81562	0.0051	0.0966751	no
XLOC_033626	XLOC_033626	LOC_Os04g57200	heavy metal transport/detoxification protein, putative, expressed	2.5448	Up Regulated	Chr4:34080547-34081927	HCR1	H48	OK	24.1012	140.638	3.08813	0.00115	0.0363793	yes
XLOC_051863	XLOC_051863	LOC_Os08g11450	expressed protein	2.55785	Up Regulated	Chr8:6719256-6720065	HCR1	H48	OK	10.3958	61.2136	2.43525	0.00765	0.118815	no
XLOC_001133	XLOC_001133	LOC_Os01g26120	membrane associated DUF588 domain containing protein, putative, expressed	2.57324	Up Regulated	Chr1:14793092-14797228	HCR1	H48	OK	7.99638	47.5899	2.5542	0.00875	0.131972	no
XLOC_002765	XLOC_002765	LOC_Os01g61070	heavy metal-associated domain containing protein, expressed	2.58442	Up Regulated	Chr1:35332704-35333504	HCR1	H48	OK	9.22512	55.3298	2.56235	0.0046	0.0889861	no
XLOC_002484	XLOC_002484	LOC_Os01g55510	dynein light chain type 1 domain containing protein, expressed	2.58753	Up Regulated	Chr1:31981930-31982832	HCR1	H48	OK	6.66122	40.0384	2.46577	0.00525	0.0988773	no
XLOC_005169	XLOC_005169	LOC_Os01g41800	cytochrome P450, putative, expressed	2.5919	Up Regulated	Chr1:23663058-23685511	HCR1	H48	OK	15.6769	94.5153	3.1899	0.00475	0.0914641	no
XLOC_005169	XLOC_005169	LOC_Os01g41810	cytochrome P450 72A1, putative, expressed	2.5919	Up Regulated	Chr1:23663058-23685511	HCR1	H48	OK	15.6769	94.5153	3.1899	0.00475	0.0914641	no
XLOC_005169	XLOC_005169	LOC_Os01g41820	cytochrome P450 72A1, putative, expressed	2.5919	Up Regulated	Chr1:23663058-23685511	HCR1	H48	OK	15.6769	94.5153	3.1899	0.00475	0.0914641	no
XLOC_048568	XLOC_048568	LOC_Os07g41410	EGG APPARATUS-1, putative, expressed	2.592	Up Regulated	Chr7:24809649-24811275	HCR1	H48	OK	83.98	506.345	2.81205	0.00545	0.099416	no
XLOC_038101	XLOC_038101	LOC_Os05g30350	Os5bglu22 - beta-glucosidase homologue, similar to G. max isohydroxyurate hydrolase, expressed	2.59383	Up Regulated	Chr5:17594908-17600513	HCR1	H48	OK	5.73791	34.6398	3.05453	0.0027	0.0635947	no
XLOC_019935	XLOC_019935	LOC_Os02g10880	UDP-glucoronosyl and UDP-glucosyl transferase domain containing protein, expressed	2.59421	Up Regulated	Chr2:5775808-5777385	HCR1	H48	OK	20.1737	121.82	3.1802	0.00075	0.0286569	yes
XLOC_014502	XLOC_014502	LOC_Os11g37230	zinc finger, C3HC4 type domain containing protein, expressed	2.6026	Up Regulated	Chr11:21991573-21994240	HCR1	H48	OK	17.7316	107.698	3.17161	0.0008	0.0291957	yes
XLOC_025335	XLOC_025335	LOC_Os03g04060	CHIT16 - Chitinase family protein precursor, expressed	2.6028	Up Regulated	Chr3:1860426-1861786	HCR1	H48	OK	6.21999	37.7843	2.68262	0.0092	0.136853	no
XLOC_030191	XLOC_030191	LOC_Os03g50490	glutamine synthetase, catalytic domain containing protein, expressed	2.60575	Up Regulated	Chr3:28822404-28826521	HCR1	H48	OK	2.47687	15.0769	2.32686	0.0095	0.140387	no
XLOC_008165	XLOC_008165	LOC_Os10g30450	heavy-metal-associated domain-containing protein, putative, expressed	2.61794	Up Regulated	Chr10:15827043-15828826	HCR1	H48	OK	28.226	173.271	3.38294	0.00095	0.0318081	yes
XLOC_047526	XLOC_047526	LOC_Os07g18990	LTPL40 - Protease inhibitor/seed storage/LTP family protein precursor, expressed	2.624	Up Regulated	Chr7:11241308-11242149	HCR1	H48	OK	28.909	178.212	3.03886	0.0016	0.0444563	yes
XLOC_050440	XLOC_050440	LOC_Os07g33270	DUF584 domain containing protein, putative, expressed	2.63183	Up Regulated	Chr7:19887176-19888285	HCR1	H48	OK	11.7462	72.8047	2.83702	0.00305	0.0700877	no
XLOC_043451	XLOC_043451	LOC_Os06g40210	expressed protein	2.63563	Up Regulated	Chr6:23949818-23950694	HCR1	H48	OK	34.7345	215.855	2.81347	0.0043	0.0840729	no
XLOC_005196	XLOC_005196	LOC_Os01g42410	pleiotropic drug resistance protein, putative, expressed	2.6377	Up Regulated	Chr1:24107079-24115332	HCR1	H48	OK	2.56175	15.9427	2.83958	0.0021	0.0541774	no
XLOC_035977	XLOC_035977	LOC_Os04g49370	expressed protein	2.63858	Up Regulated	Chr4:29465463-29467194	HCR1	H48	OK	9.43794	58.772	2.74311	0.0022	0.0561646	no
XLOC_011994	XLOC_011994	LOC_Os11g29870	WRKY72, expressed	2.64135	Up Regulated	Chr11:17352084-17355820	HCR1	H48	OK	4.01583	25.0554	2.69105	0.00895	0.134227	no
XLOC_015505	XLOC_015505	LOC_Os12g07580	dirigent, putative, expressed	2.64695	Up Regulated	Chr12:3789861-3790727	HCR1	H48	OK	8.51335	53.3225	2.5337	0.0073	0.116042	no
XLOC_048201	XLOC_048201	LOC_Os07g33780	pleiotropic drug resistance protein 5, putative, expressed	2.65207	Up Regulated	Chr7:20205244-20218702	HCR1	H48	OK	16.8667	106.019	2.45376	0.00325	0.0736415	no
XLOC_017202	XLOC_017202	LOC_Os12g43880	DNA binding protein, putative, expressed	2.65806	Up Regulated	Chr12:27243659-27246160	HCR1	H48	OK	8.91114	56.2457	2.72548	0.0059	0.100091	no
XLOC_027509	XLOC_027509	LOC_Os03g53020	helix-loop-helix DNA-binding domain containing protein, expressed	2.65861	Up Regulated	Chr3:30400591-30409447	HCR1	H48	OK	12.6759	80.0386	2.07634	0.0098	0.143442	no
XLOC_022325	XLOC_022325	LOC_Os02g04230	CGMC_MAPKCMGC_2.7 - CGMC includes CDA, MAPK, GSK3, and CLKC kinases, expressed	2.66411	Up Regulated	Chr2:1850953-1859013	HCR1	H48	OK	2.63987	16.7325	2.85697	0.00505	0.0959763	no
XLOC_024113	XLOC_024113	LOC_Os02g43360	cytochrome b5-like Heme/Steroid binding domain containing protein, expressed	2.66465	Up Regulated	Chr2:26163058-26164221	HCR1	H48	OK	14.4709	91.7562	2.98784	0.0021	0.0541774	no
XLOC_046069	XLOC_046069	LOC_Os06g44170	NAD dependent epimerase/dehydratase family protein, putative, expressed	2.68509	Up Regulated	Chr6:26650126-26652370	HCR1	H48	OK	15.0505	96.7925	3.25063	0.00145	0.0409502	yes
XLOC_035397	XLOC_035397	LOC_Os04g37670	steroid nuclear receptor, ligand-binding, putative, expressed	2.69634	Up Regulated	Chr4:22396528-22401800	HCR1	H48	OK	2.68592	17.4089	2.99846	0.0023	0.0561646	no
XLOC_041254	XLOC_041254	LOC_Os05g48650	transcription factor HBP-1b, putative, expressed	2.71088	Up Regulated	Chr5:27883502-27884410	HCR1	H48	OK	11.2423	73.6058	2.63779	0.0052	0.0981886	no
XLOC_029281	XLOC_029281	LOC_Os03g29850	metal cation transporter, putative, expressed	2.71625	Up Regulated	Chr3:17007954-17011263	HCR1	H48	OK	37.5132	246.523	3.07715	0.00255	0.0608958	no
XLOC_000947	XLOC_000947	LOC_Os01g22230	peroxidase precursor, putative, expressed	2.72414	Up Regulated	Chr1:12499830-12570032	HCR1	H48	OK	48.9566	323.489	3.14393	0.0009	0.0305186	yes
XLOC_000947	XLOC_000947	LOC_Os01g22249	peroxidase precursor, putative, expressed	2.72414	Up Regulated	Chr1:12499830-12570032	HCR1	H48	OK	48.9566	323.489	3.14393	0.0009	0.0305186	yes
XLOC_000947	XLOC_000947	LOC_Os01g22336	peroxidase precursor, putative, expressed	2.72414	Up Regulated	Chr1:12499830-12570032	HCR1	H48	OK	48.9566	323.489	3.14393	0.0009	0.0305186	yes
XLOC_000947	XLOC_000947	LOC_Os01g22352	peroxidase precursor, putative, expressed	2.72414	Up Regulated	Chr1:12499830-12570032	HCR1	H48	OK	48.9566	323.489	3.14393	0.0009	0.0305186	yes
XLOC_027602	XLOC_027602	LOC_Os03g55410	peroxidase precursor, putative, expressed	2.72531	Up Regulated	Chr3:31526725-31528307	HCR1	H48	OK	10.6707	70.5656	3.08618	0.00255	0.0608958	no
XLOC_032557	XLOC_032557	LOC_Os04g33390	prephenate dehydratase domain containing protein, expressed	2.72697	Up Regulated	Chr4:20169584-20171246	HCR1	H48	OK	7.15643	47.3802	2.80656	0.0093	0.137849	no
XLOC_028560	XLOC_028560	LOC_Os03g13210	peroxidase precursor, putative, expressed	2.72873	Up Regulated	Chr3:7128180-7130342	HCR1	H48	OK	4.682	31.0356	2.78951	0.0067	0.110147	no
XLOC_024218	XLOC_024218	LOC_Os02g45225	expressed protein	2.73186	Up Regulated	Chr2:27473952-27475760	HCR1	H48	OK	77.4948	514.808	3.00527	0.0016	0.0444563	yes
XLOC_042546	XLOC_042546	LOC_Os06g20200	gibberellin receptor GID1L2, putative, expressed	2.73194	Up Regulated	Chr6:11586342-11588079	HCR1	H48	OK	10.4791	69.6176	3.16705	0.00095	0.0318081	yes
XLOC_048728	XLOC_048728	LOC_Os07g44410	WD40-like Beta Propeller Repeat family protein, expressed	2.73225	Up Regulated	Chr7:26542979-26545183	HCR1	H48	OK	17.8234	118.435	3.18436	0.0018	0.049172	yes
XLOC_035540	XLOC_035540	LOC_Os04g40460	cytochrome P450, putative, expressed	2.73959	Up Regulated	Chr4:24043879-24051142	HCR1	H48	OK	6.54505	43.7131	2.78763	0.00555	0.099416	no
XLOC_035540	XLOC_035540	LOC_Os04g40470	cytochrome P450, putative, expressed	2.73959	Up Regulated	Chr4:24043879-24051142	HCR1	H48	OK	6.54505	43.7131	2.78763	0.00555	0.099416	no
XLOC_041779	XLOC_041779	LOC_Os06g03830	retinol dehydrogenase, putative, expressed	2.73979	Up Regulated	Chr6:1538977-1542212	HCR1	H48	OK	23.9247	159.811	3.29728	0.00085	0.0291957	yes
XLOC_021260	XLOC_021260	LOC_Os02g39880	expressed protein	2.7463	Up Regulated	Chr2:24095853-24097712	HCR1	H48	OK	10.7071	71.8444	2.76787	0.0049	0.0937963	no
XLOC_005194	XLOC_005194	LOC_Os01g42380	pleiotropic drug resistance protein, putative, expressed	2.7464	Up Regulated	Chr1:24075064-24082181	HCR1	H48	OK	3.18223	21.3541	3.12484	0.00105	0.0341017	yes
XLOC_004084	XLOC_004084	LOC_Os01g15340	flowering promoting factor-like 1, putative, expressed	2.75053	Up Regulated	Chr1:8586048-8586941	HCR1	H48	OK	15.9602	107.407	3.05018	0.0026	0.0617368	no
XLOC_033000	XLOC_033000	LOC_Os04g43710	CAMK_CAMK_like.3 - CAMK includes calcium/calmodulin depedent protein kinases, expressed	2.75336	Up Regulated	Chr4:25867806-25869189	HCR1	H48	OK	28.5289	192.367	3.00931	0.0017	0.04679	yes
XLOC_040672	XLOC_040672	LOC_Os05g35010	cytochrome P450, putative, expressed	2.75698	Up Regulated	Chr5:20792433-20794367	HCR1	H48	OK	12.7624	86.2708	3.188	0.0012	0.0377567	yes
XLOC_035705	XLOC_035705	LOC_Os04g43800	phenylalanine ammonia-lyase, putative, expressed	2.75784	Up Regulated	Chr4:25926987-25929732	HCR1	H48	OK	2.69381	18.2205	2.75572	0.0063	0.105228	no
XLOC_024258	XLOC_024258	LOC_Os02g45930	expressed protein	2.75799	Up Regulated	Chr2:27989365-27990587	HCR1	H48	OK	17.6673	119.511	3.04669	0.0034	0.0764477	no
XLOC_039250	XLOC_039250	LOC_Os05g03640	flavonol synthase/flavanone 3-hydroxylase, putative, expressed	2.76324	Up Regulated	Chr5:1561979-1568165	HCR1	H48	OK	4.00652	27.201	2.79159	0.0049	0.0937963	no
XLOC_027829	XLOC_027829	LOC_Os03g60080	NAC domain-containing protein 67, putative, expressed	2.7645	Up Regulated	Chr3:34166098-34167546	HCR1	H48	OK	38.9143	264.428	3.67252	5e-05	0.00429853	yes
XLOC_053679	XLOC_053679	LOC_Os08g04440	RNA recognition motif containing protein, putative, expressed	2.76907	Up Regulated	Chr8:2173390-2177071	HCR1	H48	OK	32.8745	224.094	3.28722	0.0015	0.0422399	yes
XLOC_025213	XLOC_025213	LOC_Os03g01740	expressed protein	2.77405	Up Regulated	Chr3:470267-471096	HCR1	H48	OK	8.97109	61.3646	2.84651	0.00575	0.099416	no
XLOC_048499	XLOC_048499	LOC_Os07g40000	DUF260 domain containing protein, putative, expressed	2.7742	Up Regulated	Chr7:23991332-24001317	HCR1	H48	OK	22.093	151.137	2.95906	0.001	0.0329538	yes
XLOC_028206	XLOC_028206	LOC_Os03g05130	expressed protein	2.77618	Up Regulated	Chr3:2494383-2495468	HCR1	H48	OK	6.71518	46.0013	2.66888	0.0058	0.099416	no
XLOC_012625	XLOC_012625	LOC_Os11g43520	OsGrx_C17 - glutaredoxin subgroup III, expressed	2.77794	Up Regulated	Chr11:26269973-26270588	HCR1	H48	OK	18.4312	126.414	2.80802	0.0063	0.105228	no
XLOC_047076	XLOC_047076	LOC_Os07g09420	ATPase, putative, expressed	2.77894	Up Regulated	Chr7:4969372-4971156	HCR1	H48	OK	22.7905	156.422	3.57601	0.00045	0.0222941	yes
XLOC_035698	XLOC_035698	LOC_Os04g43680	MYB family transcription factor, putative, expressed	2.7793	Up Regulated	Chr4:25843037-25844912	HCR1	H48	OK	7.45392	51.1726	2.82402	0.0075	0.117107	no
XLOC_043786	XLOC_043786	LOC_Os06g46950	EF hand family protein, putative, expressed	2.7842	Up Regulated	Chr6:28483806-28484624	HCR1	H48	OK	7.44965	51.3172	2.65793	0.0043	0.0840729	no
XLOC_048614	XLOC_048614	LOC_Os07g42310	lung seven transmembrane domain containing protein, putative, expressed	2.78465	Up Regulated	Chr7:25320454-25323506	HCR1	H48	OK	9.92214	68.3703	3.278	0.00125	0.0387745	yes
XLOC_048104	XLOC_048104	LOC_Os07g32010	UDP-glucoronosyl and UDP-glucosyl transferase domain containing protein, expressed	2.78807	Up Regulated	Chr7:19007721-19039618	HCR1	H48	OK	17.0422	117.711	3.05042	0.00105	0.0341017	yes
XLOC_003505	XLOC_003505	LOC_Os01g03390	BBTI7 - Bowman-Birk type bran trypsin inhibitor precursor, expressed	2.78911	Up Regulated	Chr1:1365507-1366503	HCR1	H48	OK	226.845	1567.96	2.91151	0.00765	0.118815	no
XLOC_039517	XLOC_039517	LOC_Os05g09020	WRKY67, expressed	2.79866	Up Regulated	Chr5:4998140-4999629	HCR1	H48	OK	56.3536	392.107	3.32054	0.0012	0.0377567	yes
XLOC_043995	XLOC_043995	LOC_Os06g51060	CHIT8 - Chitinase family protein precursor, expressed	2.82675	Up Regulated	Chr6:30890710-30892066	HCR1	H48	OK	32.0547	227.42	3.63121	0.00045	0.0222941	yes
XLOC_027340	XLOC_027340	LOC_Os03g49440	phosphatase, putative, expressed	2.82697	Up Regulated	Chr3:28143096-28146332	HCR1	H48	OK	22.4507	159.306	3.32716	0.0013	0.0387745	yes
XLOC_048860	XLOC_048860	LOC_Os07g46846	sex determination protein tasselseed-2, putative, expressed	2.83175	Up Regulated	Chr7:28002441-28021888	HCR1	H48	OK	21.4841	152.954	3.23006	0.00195	0.050937	no
XLOC_048860	XLOC_048860	LOC_Os07g46852	sex determination protein tasselseed-2, putative, expressed	2.83175	Up Regulated	Chr7:28002441-28021888	HCR1	H48	OK	21.4841	152.954	3.23006	0.00195	0.050937	no
XLOC_048860	XLOC_048860	LOC_Os07g46870	sex determination protein tasselseed-2, putative, expressed	2.83175	Up Regulated	Chr7:28002441-28021888	HCR1	H48	OK	21.4841	152.954	3.23006	0.00195	0.050937	no
XLOC_040488	XLOC_040488	LOC_Os05g31140	glycosyl hydrolases family 17, putative, expressed	2.83502	Up Regulated	Chr5:18106223-18110987	HCR1	H48	OK	87.0465	621.124	3.25245	0.00125	0.0387745	yes
XLOC_030249	XLOC_030249	LOC_Os03g51960	expressed protein	2.84725	Up Regulated	Chr3:29798631-29800528	HCR1	H48	OK	13.0926	94.2175	3.17808	0.00065	0.0282221	yes
XLOC_024377	XLOC_024377	LOC_Os02g48210	lectin-like protein kinase, putative, expressed	2.84856	Up Regulated	Chr2:29519467-29528328	HCR1	H48	OK	2.52061	18.1554	2.92556	0.00455	0.0881355	no
XLOC_024377	XLOC_024377	LOC_Os02g48220	expressed protein	2.84856	Up Regulated	Chr2:29519467-29528328	HCR1	H48	OK	2.52061	18.1554	2.92556	0.00455	0.0881355	no
XLOC_018873	XLOC_018873	LOC_Os12g36110	calmodulin binding protein, putative, expressed	2.84868	Up Regulated	Chr12:22126679-22136895	HCR1	H48	OK	2.83045	20.3889	2.95748	0.0046	0.0889861	no
XLOC_058503	XLOC_058503	LOC_Os09g21180	homeobox associated leucine zipper, putative, expressed	2.85241	Up Regulated	Chr9:12780628-12783649	HCR1	H48	OK	33.5218	242.097	3.67097	5e-05	0.00429853	yes
XLOC_027603	XLOC_027603	LOC_Os03g55420	peroxidase precursor, putative, expressed	2.8771	Up Regulated	Chr3:31530775-31533526	HCR1	H48	OK	15.0897	110.86	3.17039	0.00235	0.0571944	no
XLOC_017469	XLOC_017469	LOC_Os12g05890	expressed protein	2.89235	Up Regulated	Chr12:2705804-2706749	HCR1	H48	OK	8.27533	61.4425	2.8832	0.0029	0.0672754	no
XLOC_041682	XLOC_041682	LOC_Os06g01972	auxin-induced protein 5NG4, putative, expressed	2.89327	Up Regulated	Chr6:546503-550383	HCR1	H48	OK	3.4027	25.2805	2.82319	0.00535	0.099416	no
XLOC_046082	XLOC_046082	LOC_Os06g44450	CCT/B-box zinc finger protein, putative, expressed	2.89758	Up Regulated	Chr6:26843086-26844776	HCR1	H48	OK	86.783	646.684	3.05856	0.004	0.0793216	no
XLOC_004560	XLOC_004560	LOC_Os01g27210	glutathione S-transferase, putative, expressed	2.90072	Up Regulated	Chr1:15170344-15171860	HCR1	H48	OK	7.45731	55.691	2.97671	0.00485	0.0932055	no
XLOC_028654	XLOC_028654	LOC_Os03g15050	phosphoenolpyruvate carboxykinase, putative, expressed	2.9092	Up Regulated	Chr3:8218790-8224127	HCR1	H48	OK	53.6276	402.853	2.98592	0.0037	0.0771319	no
XLOC_010440	XLOC_010440	LOC_Os10g40934	flavonol synthase/flavanone 3-hydroxylase, putative, expressed	2.91395	Up Regulated	Chr10:21988521-21993809	HCR1	H48	OK	4.55995	34.3674	3.21581	0.0014	0.0409502	yes
XLOC_024035	XLOC_024035	LOC_Os02g41840	DUF584 domain containing protein, putative, expressed	2.92033	Up Regulated	Chr2:25153198-25154265	HCR1	H48	OK	8.12242	61.4883	3.0327	0.00515	0.0974333	no
XLOC_056975	XLOC_056975	LOC_Os09g26620	auxin-repressed protein, putative, expressed	2.92316	Up Regulated	Chr9:16153175-16155170	HCR1	H48	OK	133.317	1011.21	2.81918	0.00645	0.107426	no
XLOC_044214	XLOC_044214	LOC_Os06g04990	early nodulin 93 ENOD93 protein, putative, expressed	2.95131	Up Regulated	Chr6:2199241-2200638	HCR1	H48	OK	10.4271	80.6484	3.33673	0.0009	0.0305186	yes
XLOC_028041	XLOC_028041	LOC_Os03g01330	sodium/potassium/calcium exchanger 1, putative, expressed	2.9531	Up Regulated	Chr3:235793-236750	HCR1	H48	OK	5.29571	41.0106	2.90759	0.0033	0.0746009	no
XLOC_043401	XLOC_043401	LOC_Os06g39370	OsFBK16 - F-box domain and kelch repeat containing protein, expressed	2.95417	Up Regulated	Chr6:23367124-23368831	HCR1	H48	OK	5.33362	41.3348	3.08336	0.00385	0.0771319	no
XLOC_058961	XLOC_058961	LOC_Os09g31478	auxin efflux carrier component, putative, expressed	2.96306	Up Regulated	Chr9:18978121-18983481	HCR1	H48	OK	9.52872	74.3027	3.54998	0.00055	0.0253173	yes
XLOC_030177	XLOC_030177	LOC_Os03g50160	plastocyanin-like domain containing protein, putative, expressed	2.9655	Up Regulated	Chr3:28604431-28606325	HCR1	H48	OK	9.61193	75.0782	2.81774	0.0032	0.0727341	no
XLOC_057056	XLOC_057056	LOC_Os09g28160	phosphate carrier protein, mitochondrial precursor, putative, expressed	2.96934	Up Regulated	Chr9:17080931-17083569	HCR1	H48	OK	3.37115	26.402	2.94539	0.0024	0.0580248	no
XLOC_055393	XLOC_055393	LOC_Os08g40680	glycosyl hydrolase, putative, expressed	2.97179	Up Regulated	Chr8:25758850-25759949	HCR1	H48	OK	15.6881	123.074	3.38318	0.0015	0.0422399	yes
XLOC_026317	XLOC_026317	LOC_Os03g24930	tyrosine protein kinase domain containing protein, putative, expressed	2.98573	Up Regulated	Chr3:14206980-14209164	HCR1	H48	OK	17.1283	135.678	3.41574	0.0006	0.0268165	yes
XLOC_040164	XLOC_040164	LOC_Os05g23924	glycosyl hydrolase family 10 protein, putative, expressed	2.99143	Up Regulated	Chr5:13755513-13763435	HCR1	H48	OK	2.30411	18.3238	2.98725	0.00735	0.116042	no
XLOC_012353	XLOC_012353	LOC_Os11g37960	WIP4 - Wound-induced protein precursor, expressed	3.0013	Up Regulated	Chr11:22505992-22507419	HCR1	H48	OK	25.771	206.354	3.66058	0.00045	0.0222941	yes
XLOC_029976	XLOC_029976	LOC_Os03g46070	thaumatin, putative, expressed	3.00809	Up Regulated	Chr3:26034425-26035357	HCR1	H48	OK	20.5018	164.937	3.36736	0.00145	0.0409502	yes
XLOC_047061	XLOC_047061	LOC_Os07g09190	transketolase, putative, expressed	3.00934	Up Regulated	Chr7:4821206-4824667	HCR1	H48	OK	8.9414	71.9959	3.46172	0.00055	0.0253173	yes
XLOC_027579	XLOC_027579	LOC_Os03g55010	UDP-glucoronosyl and UDP-glucosyl transferase domain containing protein, expressed	3.01383	Up Regulated	Chr3:31281993-31284676	HCR1	H48	OK	4.45361	35.972	3.02477	0.0024	0.0580248	no
XLOC_013013	XLOC_013013	LOC_Os11g04030	major facilitator superfamily antiporter, putative, expressed	3.01712	Up Regulated	Chr11:1626473-1631421	HCR1	H48	OK	1.26752	10.2612	2.50624	0.007	0.113799	no
XLOC_053678	XLOC_053678	LOC_Os08g04430	expressed protein	3.02393	Up Regulated	Chr8:2170397-2171348	HCR1	H48	OK	20.8981	169.981	2.91794	0.0021	0.0541774	no
XLOC_030557	XLOC_030557	LOC_Os03g58850	uncharacterized PE-PGRS family protein PE_PGRS3 precursor, putative, expressed	3.02775	Up Regulated	Chr3:33512912-33513726	HCR1	H48	OK	13.4434	109.636	2.84273	0.00335	0.0755559	no
XLOC_004982	XLOC_004982	LOC_Os01g37630	esterase, putative, expressed	3.02923	Up Regulated	Chr1:21056630-21058040	HCR1	H48	OK	2.09282	17.0852	2.471	0.00955	0.140912	no
XLOC_037141	XLOC_037141	LOC_Os05g07810	universal stress protein domain containing protein, putative, expressed	3.03075	Up Regulated	Chr5:4205346-4207904	HCR1	H48	OK	10.1042	82.5749	3.03056	0.0042	0.0827264	no
XLOC_047233	XLOC_047233	LOC_Os07g12800	expressed protein	3.03766	Up Regulated	Chr7:7320902-7323790	HCR1	H48	OK	9.57189	78.6001	3.85534	0.0004	0.020991	yes
XLOC_033375	XLOC_033375	LOC_Os04g52180	expressed protein	3.03806	Up Regulated	Chr4:31000117-31001986	HCR1	H48	OK	85.3706	701.223	3.02697	0.00125	0.0387745	yes
XLOC_005959	XLOC_005959	LOC_Os01g60020	NAC domain transcription factor, putative, expressed	3.03979	Up Regulated	Chr1:34692829-34694391	HCR1	H48	OK	8.33155	68.5163	3.51021	0.0009	0.0305186	yes
XLOC_050860	XLOC_050860	LOC_Os07g42510	AP2 domain containing protein, expressed	3.04289	Up Regulated	Chr7:25440817-25442695	HCR1	H48	OK	5.21851	43.0079	3.38797	0.00055	0.0253173	yes
XLOC_012694	XLOC_012694	LOC_Os11g44750	retrotransposon protein, putative, unclassified, expressed	3.04513	Up Regulated	Chr11:27077920-27089878	HCR1	H48	OK	1.13727	9.38724	2.75601	0.0043	0.0840729	no
XLOC_010952	XLOC_010952	LOC_Os11g05550	expressed protein	3.04631	Up Regulated	Chr11:2506940-2508424	HCR1	H48	OK	15.4527	127.654	3.50431	0.00125	0.0387745	yes
XLOC_057944	XLOC_057944	LOC_Os09g09830	heavy-metal-associated domain-containing protein, putative, expressed	3.07327	Up Regulated	Chr9:5327469-5330268	HCR1	H48	OK	13.0193	109.581	3.00972	0.0017	0.04679	yes
XLOC_002589	XLOC_002589	LOC_Os01g57770	OsPOP4 - Putative Prolyl Oligopeptidase homologue, expressed	3.07554	Up Regulated	Chr1:33409652-33415577	HCR1	H48	OK	6.85206	57.7631	2.93587	0.0039	0.0778137	no
XLOC_014523	XLOC_014523	LOC_Os11g37700	pleiotropic drug resistance protein, putative, expressed	3.07577	Up Regulated	Chr11:22272819-22282438	HCR1	H48	OK	2.76925	23.3487	3.2146	0.00085	0.0291957	yes
XLOC_047674	XLOC_047674	LOC_Os07g23660	retrotransposon protein, putative, unclassified, expressed	3.07635	Up Regulated	Chr7:13366415-13367586	HCR1	H48	OK	22.9159	193.291	3.89183	0.00075	0.0286569	yes
XLOC_025784	XLOC_025784	LOC_Os03g13390	oxidoreductase, aldo/keto reductase family protein, putative, expressed	3.07746	Up Regulated	Chr3:7228963-7231749	HCR1	H48	OK	8.79378	74.2306	3.47149	0.0011	0.0352169	yes
XLOC_059179	XLOC_059179	LOC_Os09g37330	OsSAUR39 - Auxin-responsive SAUR gene family member, expressed	3.08441	Up Regulated	Chr9:21565735-21566560	HCR1	H48	OK	9.59006	81.3434	3.39894	0.00095	0.0318081	yes
XLOC_002325	XLOC_002325	LOC_Os01g52260	serine acetyltransferase protein, putative, expressed	3.08677	Up Regulated	Chr1:30042526-30043938	HCR1	H48	OK	12.5671	106.769	3.52023	0.00095	0.0318081	yes
XLOC_049270	XLOC_049270	LOC_Os07g06850	gibberellin receptor GID1L2, putative, expressed	3.08888	Up Regulated	Chr7:3344779-3346557	HCR1	H48	OK	3.97176	33.7931	3.14066	0.00265	0.0627202	no
XLOC_022764	XLOC_022764	LOC_Os02g14190	spermidine synthase, putative, expressed	3.09133	Up Regulated	Chr2:7772398-7776161	HCR1	H48	OK	2.10261	17.9202	2.92122	0.0048	0.092366	no
XLOC_003222	XLOC_003222	LOC_Os01g71340	glycosyl hydrolases family 17, putative, expressed	3.09664	Up Regulated	Chr1:41346573-41348411	HCR1	H48	OK	11.634	99.5206	3.35481	0.0013	0.0387745	yes
XLOC_040813	XLOC_040813	LOC_Os05g38264	expressed protein	3.09733	Up Regulated	Chr5:22436429-22437469	HCR1	H48	OK	7.37437	63.1122	3.17911	0.0049	0.0937963	no
XLOC_019814	XLOC_019814	LOC_Os02g07690	VQ domain containing protein, putative, expressed	3.10338	Up Regulated	Chr2:4008990-4010136	HCR1	H48	OK	10.8651	93.3782	3.31276	0.001	0.0329538	yes
XLOC_022635	XLOC_022635	LOC_Os02g11070	3-ketoacyl-CoA synthase, putative, expressed	3.11536	Up Regulated	Chr2:5930192-5933079	HCR1	H48	OK	3.03129	26.2691	3.01111	0.0086	0.130518	no
XLOC_011371	XLOC_011371	LOC_Os11g15040	S-adenosyl-L-methionine:benzoic acid/salicylic acid carboxyl methyltransferase, putative, expressed	3.14279	Up Regulated	Chr11:8466831-8517621	HCR1	H48	OK	20.8096	183.797	3.80215	0.00015	0.0100793	yes
XLOC_040683	XLOC_040683	LOC_Os05g35290	phenylalanine ammonia-lyase, putative, expressed	3.14998	Up Regulated	Chr5:20953409-20955923	HCR1	H48	OK	5.06978	45.0015	3.49637	0.00055	0.0253173	yes
XLOC_044506	XLOC_044506	LOC_Os06g11240	12-oxophytodienoate reductase, putative, expressed	3.1569	Up Regulated	Chr6:5894720-5896352	HCR1	H48	OK	4.77609	42.5986	3.28086	0.00305	0.0700877	no
XLOC_044671	XLOC_044671	LOC_Os06g14260	lectin-like receptor kinase, putative, expressed	3.16274	Up Regulated	Chr6:7953934-7956231	HCR1	H48	OK	1.64174	14.7022	2.57816	0.0087	0.131422	no
XLOC_049029	XLOC_049029	LOC_Os07g01560	transporter family protein, putative, expressed	3.17482	Up Regulated	Chr7:343925-353686	HCR1	H48	OK	25.6375	231.521	2.95494	0.0035	0.0771319	no
XLOC_038751	XLOC_038751	LOC_Os05g44270	VQ domain containing protein, putative, expressed	3.18345	Up Regulated	Chr5:25760308-25761442	HCR1	H48	OK	13.3712	121.474	3.28357	0.0037	0.0771319	no
XLOC_016776	XLOC_016776	LOC_Os12g35340	OsGrx_C11 - glutaredoxin subgroup III, expressed	3.18887	Up Regulated	Chr12:21480111-21481075	HCR1	H48	OK	10.9781	100.109	3.25899	0.0009	0.0305186	yes
XLOC_053247	XLOC_053247	LOC_Os08g39850	lipoxygenase, chloroplast precursor, putative, expressed	3.21031	Up Regulated	Chr8:25216362-25250279	HCR1	H48	OK	3.26021	30.1747	3.03507	0.0022	0.0561646	no
XLOC_038074	XLOC_038074	LOC_Os05g29790	pectinesterase, putative, expressed	3.21246	Up Regulated	Chr5:17237007-17240346	HCR1	H48	OK	4.68041	43.3841	3.36626	0.0029	0.0672754	no
XLOC_029975	XLOC_029975	LOC_Os03g46060	thaumatin family domain containing protein, expressed	3.21467	Up Regulated	Chr3:26032939-26033802	HCR1	H48	OK	55.3919	514.233	4.13943	0.00015	0.0100793	yes
XLOC_057074	XLOC_057074	LOC_Os09g28500	EF hand family protein, putative, expressed	3.22417	Up Regulated	Chr9:17332717-17333539	HCR1	H48	OK	16.7569	156.591	3.59389	0.00065	0.0282221	yes
XLOC_057535	XLOC_057535	LOC_Os09g39940	plastocyanin-like domain containing protein, putative, expressed	3.23401	Up Regulated	Chr9:22907851-22908809	HCR1	H48	OK	12.9078	121.447	3.24966	0.00305	0.0700877	no
XLOC_037920	XLOC_037920	LOC_Os05g26040	pumilio-family RNA binding repeat containing protein, expressed	3.25193	Up Regulated	Chr5:15136287-15194771	HCR1	H48	OK	1.59028	15.1496	2.52789	0.00715	0.115722	no
XLOC_037920	XLOC_037920	LOC_Os05g26110	transposon protein, putative, Mutator sub-class, expressed	3.25193	Up Regulated	Chr5:15136287-15194771	HCR1	H48	OK	1.59028	15.1496	2.52789	0.00715	0.115722	no
XLOC_019854	XLOC_019854	LOC_Os02g08440	WRKY71, expressed	3.25252	Up Regulated	Chr2:4542761-4544983	HCR1	H48	OK	13.9328	132.783	4.014	0.0003	0.0170603	yes
XLOC_021206	XLOC_021206	LOC_Os02g38840	glucose-6-phosphate 1-dehydrogenase, cytoplasmic isoform, putative, expressed	3.26424	Up Regulated	Chr2:23480214-23486812	HCR1	H48	OK	2.61947	25.1679	3.66658	0.00085	0.0291957	yes
XLOC_046068	XLOC_046068	LOC_Os06g44160	heat shock protein DnaJ, putative, expressed	3.26862	Up Regulated	Chr6:26646323-26647896	HCR1	H48	OK	8.67864	83.6379	3.35373	0.0011	0.0352169	yes
XLOC_034894	XLOC_034894	LOC_Os04g25440	cytokinin-O-glucosyltransferase 2, putative, expressed	3.27555	Up Regulated	Chr4:14742170-14744334	HCR1	H48	OK	7.53231	72.9401	3.31812	0.0005	0.0238029	yes
XLOC_001238	XLOC_001238	LOC_Os01g28790	PRAS-rich protein, putative, expressed	3.2756	Up Regulated	Chr1:16130514-16131447	HCR1	H48	OK	9.89949	95.8666	3.18087	0.0024	0.0580248	no
XLOC_060798	XLOC_060798	LOC_Os09g29710	beta-expansin precursor, putative, expressed	3.27772	Up Regulated	Chr9:18067433-18068462	HCR1	H48	OK	54.6971	530.465	3.85921	0.0004	0.020991	yes
XLOC_055441	XLOC_055441	LOC_Os08g41470	proteophosphoglycan ppg4, putative, expressed	3.29077	Up Regulated	Chr8:26192690-26196147	HCR1	H48	OK	6.13205	60.0105	3.2009	0.0014	0.0409502	yes
XLOC_054858	XLOC_054858	LOC_Os08g29570	pleiotropic drug resistance protein 3, putative, expressed	3.30493	Up Regulated	Chr8:18128513-18137601	HCR1	H48	OK	3.34005	33.0093	3.66355	0.00015	0.0100793	yes
XLOC_014319	XLOC_014319	LOC_Os11g33050	expressed protein	3.30796	Up Regulated	Chr11:19533662-19534782	HCR1	H48	OK	3.22321	31.9215	2.81113	0.00805	0.123453	no
XLOC_041937	XLOC_041937	LOC_Os06g07030	AP2 domain containing protein, expressed	3.3082	Up Regulated	Chr6:3337082-3338612	HCR1	H48	OK	19.5599	193.747	3.85667	0.00015	0.0100793	yes
XLOC_043723	XLOC_043723	LOC_Os06g45570	VQ domain containing protein, putative, expressed	3.3234	Up Regulated	Chr6:27594624-27595564	HCR1	H48	OK	19.3344	193.542	3.62213	0.00055	0.0253173	yes
XLOC_026341	XLOC_026341	LOC_Os03g25350	LTPL36 - Protease inhibitor/seed storage/LTP family protein precursor, expressed	3.33796	Up Regulated	Chr3:14491735-14492430	HCR1	H48	OK	9.18201	92.8461	3.16488	0.00275	0.0645643	no
XLOC_011792	XLOC_011792	LOC_Os11g25780	PB1 domain containing protein, expressed	3.36825	Up Regulated	Chr11:14705214-14714572	HCR1	H48	OK	34.1119	352.249	3.92555	0.0001	0.00743766	yes
XLOC_046869	XLOC_046869	LOC_Os07g05365	photosystem II 10 kDa polypeptide, chloroplast precursor, putative, expressed	3.37011	Up Regulated	Chr7:2456967-2458151	HCR1	H48	OK	2.47839	25.6256	2.71303	0.0069	0.112611	no
XLOC_002766	XLOC_002766	LOC_Os01g61080	WRKY24, expressed	3.37022	Up Regulated	Chr1:35347977-35350645	HCR1	H48	OK	1.29629	13.4042	2.97342	0.00675	0.110782	no
XLOC_027791	XLOC_027791	LOC_Os03g59380	LTPL28 - Protease inhibitor/seed storage/LTP family protein precursor, expressed	3.38062	Up Regulated	Chr3:33798939-33799765	HCR1	H48	OK	18.7125	194.895	3.32198	0.0037	0.0771319	no
XLOC_032779	XLOC_032779	LOC_Os04g38540	aldose 1-epimerase, putative, expressed	3.39614	Up Regulated	Chr4:22902576-22905751	HCR1	H48	OK	3.50572	36.9078	3.32133	0.0023	0.0561646	no
XLOC_023763	XLOC_023763	LOC_Os02g36190	cytochrome P450, putative, expressed	3.40027	Up Regulated	Chr2:21810333-21813460	HCR1	H48	OK	3.06014	32.3092	3.46355	0.0074	0.116042	no
XLOC_028263	XLOC_028263	LOC_Os03g06390	expressed protein	3.4041	Up Regulated	Chr3:3194832-3196705	HCR1	H48	OK	19.2927	204.235	3.33744	0.00315	0.071821	no
XLOC_016630	XLOC_016630	LOC_Os12g32390	expressed protein	3.41075	Up Regulated	Chr12:19543819-19544475	HCR1	H48	OK	14.7046	156.383	3.58008	0.0018	0.049172	yes
XLOC_008585	XLOC_008585	LOC_Os10g39680	CHIT14 - Chitinase family protein precursor, expressed	3.41881	Up Regulated	Chr10:21205699-21222247	HCR1	H48	OK	65.9401	705.204	4.18214	0.0003	0.0170603	yes
XLOC_008585	XLOC_008585	LOC_Os10g39700	CHIT15 - Chitinase family protein precursor, putative, expressed	3.41881	Up Regulated	Chr10:21205699-21222247	HCR1	H48	OK	65.9401	705.204	4.18214	0.0003	0.0170603	yes
XLOC_008549	XLOC_008549	LOC_Os10g39100	uncharacterized Cys-rich domain containing protein, putative, expressed	3.42661	Up Regulated	Chr10:20842835-20845276	HCR1	H48	OK	2.09185	22.4928	3.06236	0.0087	0.131422	no
XLOC_025778	XLOC_025778	LOC_Os03g13300	glutamate decarboxylase, putative, expressed	3.44625	Up Regulated	Chr3:7181079-7184168	HCR1	H48	OK	0.823112	8.97188	2.79363	0.00475	0.0914641	no
XLOC_001916	XLOC_001916	LOC_Os01g43844	cytochrome P450 72A1, putative, expressed	3.44889	Up Regulated	Chr1:25114080-25118391	HCR1	H48	OK	3.21219	35.0768	3.40327	0.0074	0.116042	no
XLOC_050007	XLOC_050007	LOC_Os07g23640	retrotransposon protein, putative, Ty3-gypsy subclass, expressed	3.4659	Up Regulated	Chr7:13354096-13355297	HCR1	H48	OK	14.9695	165.405	4.28565	0.00015	0.0100793	yes
XLOC_015481	XLOC_015481	LOC_Os12g07210	expressed protein	3.46627	Up Regulated	Chr12:3542456-3544936	HCR1	H48	OK	3.82087	42.2291	3.41898	0.0024	0.0580248	no
XLOC_033693	XLOC_033693	LOC_Os04g58810	CAF1 family ribonuclease containing protein, putative, expressed	3.46687	Up Regulated	Chr4:34980600-34982203	HCR1	H48	OK	3.68909	40.7898	3.23714	0.00085	0.0291957	yes
XLOC_046419	XLOC_046419	LOC_Os06g51070	no apical meristem protein, putative, expressed	3.46739	Up Regulated	Chr6:30893476-30894523	HCR1	H48	OK	6.91353	76.4694	3.45351	0.0014	0.0409502	yes
XLOC_003223	XLOC_003223	LOC_Os01g71350	glycosyl hydrolases family 17, putative, expressed	3.51798	Up Regulated	Chr1:41349730-41352839	HCR1	H48	OK	8.39923	96.2182	3.88327	5e-05	0.00429853	yes
XLOC_008358	XLOC_008358	LOC_Os10g34930	secretory protein, putative, expressed	3.54566	Up Regulated	Chr10:18640396-18641937	HCR1	H48	OK	3.22595	37.671	3.07071	0.0072	0.116042	no
XLOC_003256	XLOC_003256	LOC_Os01g72170	glutathione S-transferase, putative, expressed	3.55143	Up Regulated	Chr1:41853849-41854883	HCR1	H48	OK	14.2836	167.465	3.96369	0.00045	0.0222941	yes
XLOC_018332	XLOC_018332	LOC_Os12g25090	expressed protein	3.58035	Up Regulated	Chr12:14411271-14412023	HCR1	H48	OK	6.42067	76.8021	3.07049	0.008	0.122944	no
XLOC_028078	XLOC_028078	LOC_Os03g02070	heavy-metal-associated domain-containing protein, putative, expressed	3.58093	Up Regulated	Chr3:656449-657834	HCR1	H48	OK	5.03899	60.2989	3.10465	0.0047	0.0906805	no
XLOC_040800	XLOC_040800	LOC_Os05g38040	expressed protein	3.58295	Up Regulated	Chr5:22303383-22306369	HCR1	H48	OK	52.9638	634.682	2.81156	0.00125	0.0387745	yes
XLOC_003315	XLOC_003315	LOC_Os01g73250	abscisic stress-ripening, putative, expressed	3.592	Up Regulated	Chr1:42460554-42462334	HCR1	H48	OK	4.50543	54.3294	3.16649	0.00485	0.0932055	no
XLOC_035723	XLOC_035723	LOC_Os04g44300	transposon protein, putative, unclassified, expressed	3.59686	Up Regulated	Chr4:26232854-26252271	HCR1	H48	OK	6.36051	76.9582	3.50825	0.0033	0.0746009	no
XLOC_036010	XLOC_036010	LOC_Os04g49950	OsFBX150 - F-box domain containing protein, expressed	3.60869	Up Regulated	Chr4:29790930-29797445	HCR1	H48	OK	0.51214	6.24759	3.19068	0.0068	0.111415	no
XLOC_010184	XLOC_010184	LOC_Os10g34920	secretory protein, putative, expressed	3.60938	Up Regulated	Chr10:18637488-18638521	HCR1	H48	OK	2.97151	36.2668	3.0926	0.0064	0.106655	no
XLOC_050517	XLOC_050517	LOC_Os07g35370	TKL_IRAK_DUF26-lc.15 - DUF26 kinases have homology to DUF26 containing loci, expressed	3.61039	Up Regulated	Chr7:21155349-21158977	HCR1	H48	OK	2.73386	33.3896	3.66848	0.00155	0.0433555	yes
XLOC_028364	XLOC_028364	LOC_Os03g08460	AP2 domain containing protein, expressed	3.64902	Up Regulated	Chr3:4343724-4345716	HCR1	H48	OK	1.57926	19.8115	3.06423	0.00425	0.0835986	no
XLOC_050647	XLOC_050647	LOC_Os07g37920	no apical meristem protein, putative, expressed	3.69274	Up Regulated	Chr7:22755047-22757824	HCR1	H48	OK	4.10608	53.0951	4.16412	0.0011	0.0352169	yes
XLOC_002794	XLOC_002794	LOC_Os01g61610	flavonol synthase/flavanone 3-hydroxylase, putative, expressed	3.71475	Up Regulated	Chr1:35636302-35641236	HCR1	H48	OK	20.8908	274.287	3.61381	0.00045	0.0222941	yes
XLOC_039055	XLOC_039055	LOC_Os05g50470	expressed protein	3.718	Up Regulated	Chr5:28933224-28934607	HCR1	H48	OK	6.04126	79.498	3.73408	0.00045	0.0222941	yes
XLOC_031138	XLOC_031138	LOC_Os04g01470	O-methyltransferase, putative, expressed	3.7332	Up Regulated	Chr4:316365-319162	HCR1	H48	OK	8.14728	108.348	4.15554	0.00035	0.0191224	yes
XLOC_053095	XLOC_053095	LOC_Os08g36910	alpha-amylase precursor, putative, expressed	3.73374	Up Regulated	Chr8:23340675-23343533	HCR1	H48	OK	1.73478	23.0787	3.41492	0.0008	0.0291957	yes
XLOC_040834	XLOC_040834	LOC_Os05g38680	plant-specific domain TIGR01589 family protein, expressed	3.74826	Up Regulated	Chr5:22678003-22679246	HCR1	H48	OK	2.30185	30.9326	3.02654	0.00375	0.0771319	no
XLOC_062545	XLOC_062545	LOC_Os09g29310	zinc finger, C3HC4 type domain containing protein, expressed	3.76497	Up Regulated	Chr9:17790437-17792028	HCR1	H48	OK	2.98436	40.5715	3.39734	0.0058	0.099416	no
XLOC_003921	XLOC_003921	LOC_Os01g12100	expressed protein	3.77668	Up Regulated	Chr1:6583672-6588076	HCR1	H48	OK	16.908	231.732	2.78877	0.0018	0.049172	yes
XLOC_035949	XLOC_035949	LOC_Os04g48850	aminotransferase, classes I and II, domain containing protein, expressed	3.7813	Up Regulated	Chr4:29131809-29134682	HCR1	H48	OK	1.13847	15.6533	3.19203	0.00355	0.0771319	no
XLOC_022184	XLOC_022184	LOC_Os02g01326	auxin-induced protein 5NG4, putative, expressed	3.78443	Up Regulated	Chr2:174490-179947	HCR1	H48	OK	7.11218	98.0005	3.8542	0.00015	0.0100793	yes
XLOC_001917	XLOC_001917	LOC_Os01g43851	cytochrome P450 72A1, putative, expressed	3.78789	Up Regulated	Chr1:25119733-25121927	HCR1	H48	OK	1.62212	22.4053	3.40499	0.0067	0.110147	no
XLOC_016264	XLOC_016264	LOC_Os12g24320	ATPase 3, putative, expressed	3.78789	Up Regulated	Chr12:13879066-13881561	HCR1	H48	OK	0.973288	13.4434	2.89188	0.0043	0.0840729	no
XLOC_028743	XLOC_028743	LOC_Os03g16950	cysteine-rich repeat secretory protein 55 precursor, putative, expressed	3.80605	Up Regulated	Chr3:9421688-9422925	HCR1	H48	OK	2.06083	28.8255	3.23291	0.00335	0.0755559	no
XLOC_041798	XLOC_041798	LOC_Os06g04230	expressed protein	3.81131	Up Regulated	Chr6:1784310-1784827	HCR1	H48	OK	7.47134	104.886	3.27343	0.0054	0.099416	no
XLOC_021478	XLOC_021478	LOC_Os02g44990	OsFBDUF13 - F-box and DUF domain containing protein, expressed	3.82332	Up Regulated	Chr2:27248696-27251470	HCR1	H48	OK	1.7133	24.2531	3.86451	0.0005	0.0238029	yes
XLOC_001263	XLOC_001263	LOC_Os01g29330	expressed protein	3.82633	Up Regulated	Chr1:16435855-16436845	HCR1	H48	OK	2.42614	34.4157	3.1007	0.0043	0.0840729	no
XLOC_021138	XLOC_021138	LOC_Os02g37480	glycine-rich cell wall structural protein precursor, putative, expressed	3.86071	Up Regulated	Chr2:22622378-22623188	HCR1	H48	OK	9.56203	138.912	3.39095	0.0079	0.12192	no
XLOC_021075	XLOC_021075	LOC_Os02g36070	cytochrome P450, putative, expressed	3.90353	Up Regulated	Chr2:21690377-21742030	HCR1	H48	OK	6.23129	93.2518	3.87603	0.0005	0.0238029	yes
XLOC_021075	XLOC_021075	LOC_Os02g36110	cytochrome P450, putative, expressed	3.90353	Up Regulated	Chr2:21690377-21742030	HCR1	H48	OK	6.23129	93.2518	3.87603	0.0005	0.0238029	yes
XLOC_028744	XLOC_028744	LOC_Os03g16960	cysteine-rich repeat secretory protein 55 precursor, putative, expressed	3.90762	Up Regulated	Chr3:9425489-9426843	HCR1	H48	OK	3.31278	49.7168	3.91476	0.0003	0.0170603	yes
XLOC_035565	XLOC_035565	LOC_Os04g40990	malate synthase, glyoxysomal, putative, expressed	3.91529	Up Regulated	Chr4:24325763-24328254	HCR1	H48	OK	10.5016	158.444	4.68283	5e-05	0.00429853	yes
XLOC_055458	XLOC_055458	LOC_Os08g41720	auxin efflux carrier component, putative, expressed	3.91795	Up Regulated	Chr8:26331938-26336197	HCR1	H48	OK	14.7028	222.24	3.61411	0.00025	0.0149744	yes
XLOC_051398	XLOC_051398	LOC_Os08g02110	peroxidase precursor, putative, expressed	3.92753	Up Regulated	Chr8:697179-698615	HCR1	H48	OK	15.1873	231.092	4.46256	5e-05	0.00429853	yes
XLOC_012352	XLOC_012352	LOC_Os11g37950	WIP3 - Wound-induced protein precursor, expressed	3.93985	Up Regulated	Chr11:22502006-22503109	HCR1	H48	OK	28.2191	433.069	4.83216	5e-05	0.00429853	yes
XLOC_046232	XLOC_046232	LOC_Os06g47360	beta-expansin precursor, putative, expressed	3.944	Up Regulated	Chr6:28707247-28708381	HCR1	H48	OK	22.738	349.957	4.15321	0.0008	0.0291957	yes
XLOC_020035	XLOC_020035	LOC_Os02g13340	expressed protein	3.9493	Up Regulated	Chr2:7115779-7126381	HCR1	H48	OK	2.84614	43.9658	3.56371	5e-05	0.00429853	yes
XLOC_020035	XLOC_020035	LOC_Os02g13350	hydrolase, NUDIX family, domain containing protein, expressed	3.9493	Up Regulated	Chr2:7115779-7126381	HCR1	H48	OK	2.84614	43.9658	3.56371	5e-05	0.00429853	yes
XLOC_035481	XLOC_035481	LOC_Os04g39350	heavy metal associated domain containing protein, expressed	3.95749	Up Regulated	Chr4:23422506-23423339	HCR1	H48	OK	3.33644	51.8331	3.18596	0.0031	0.0709577	no
XLOC_016246	XLOC_016246	LOC_Os12g24020	rhodanese-like domain containing protein, putative, expressed	3.98445	Up Regulated	Chr12:13657098-13658780	HCR1	H48	OK	7.02714	111.229	4.56072	5e-05	0.00429853	yes
XLOC_027026	XLOC_027026	LOC_Os03g42600	expressed protein	3.99304	Up Regulated	Chr3:23715171-23715759	HCR1	H48	OK	19.3341	307.856	3.97124	0.00085	0.0291957	yes
XLOC_002616	XLOC_002616	LOC_Os01g58290	OsSub9 - Putative Subtilisin homologue, expressed	4.00579	Up Regulated	Chr1:33691226-33698002	HCR1	H48	OK	1.81171	29.1039	3.93353	0.00115	0.0363793	yes
XLOC_051459	XLOC_051459	LOC_Os08g03410	glutelin, putative, expressed	4.02377	Up Regulated	Chr8:1597233-1599568	HCR1	H48	OK	7.04964	114.668	3.31855	0.00185	0.0503966	no
XLOC_005539	XLOC_005539	LOC_Os01g50420	STE_MEKK_ste11_MAP3K.7 - STE kinases include homologs to sterile 7, sterile 11 and sterile 20 from yeast, expressed	4.03391	Up Regulated	Chr1:28945227-28948045	HCR1	H48	OK	2.09895	34.3818	3.57956	0.0045	0.087515	no
XLOC_053242	XLOC_053242	LOC_Os08g39730	cytochrome P450, putative, expressed	4.04383	Up Regulated	Chr8:25155157-25156888	HCR1	H48	OK	1.72207	28.4032	3.44145	0.00395	0.0784898	no
XLOC_017042	XLOC_017042	LOC_Os12g40470	DC1 domain-containing protein, putative, expressed	4.05139	Up Regulated	Chr12:25040196-25041392	HCR1	H48	OK	10.7954	178.989	3.81455	0.0005	0.0238029	yes
XLOC_014945	XLOC_014945	LOC_Os11g47600	glycosyl hydrolase, putative, expressed	4.0541	Up Regulated	Chr11:28758714-28760007	HCR1	H48	OK	2.45803	40.8313	3.52297	0.0043	0.0840729	no
XLOC_033751	XLOC_033751	LOC_Os04g01354	chalcone synthase, putative, expressed	4.05697	Up Regulated	Chr4:258817-263006	HCR1	H48	OK	3.92033	65.2519	3.65658	0.0005	0.0238029	yes
XLOC_038847	XLOC_038847	LOC_Os05g46020	WRKY7, expressed	4.07007	Up Regulated	Chr5:26682471-26684208	HCR1	H48	OK	9.64058	161.926	4.13325	5e-05	0.00429853	yes
XLOC_046107	XLOC_046107	LOC_Os06g45060	expressed protein	4.08498	Up Regulated	Chr6:27261293-27262594	HCR1	H48	OK	10.6557	180.836	3.77743	0.00025	0.0149744	yes
XLOC_027308	XLOC_027308	LOC_Os03g48810	nucleobase-ascorbate transporter, putative, expressed	4.10429	Up Regulated	Chr3:27812160-27815752	HCR1	H48	OK	2.52848	43.4885	3.46208	5e-05	0.00429853	yes
XLOC_033593	XLOC_033593	LOC_Os04g56430	cysteine-rich receptor-like protein kinase, putative, expressed	4.15151	Up Regulated	Chr4:33641291-33642362	HCR1	H48	OK	54.252	964.151	4.27243	0.00015	0.0100793	yes
XLOC_028957	XLOC_028957	LOC_Os03g21790	cupin domain containing protein, expressed	4.15668	Up Regulated	Chr3:12444922-12450000	HCR1	H48	OK	1.65755	29.5633	2.98938	0.00655	0.108474	no
XLOC_002613	XLOC_002613	LOC_Os01g58240	OsSub6 - Putative Subtilisin homologue, expressed	4.16272	Up Regulated	Chr1:33659781-33674350	HCR1	H48	OK	0.516097	9.2435	2.9965	0.00985	0.14403	no
XLOC_004306	XLOC_004306	LOC_Os01g20206	methyltransferase, putative, expressed	4.17714	Up Regulated	Chr1:11505076-11506103	HCR1	H48	OK	5.86138	106.034	3.54098	0.0039	0.0778137	no
XLOC_028726	XLOC_028726	LOC_Os03g16600	expressed protein	4.19311	Up Regulated	Chr3:9156277-9157951	HCR1	H48	OK	3.56821	65.2684	1.82245	0.0008	0.0291957	yes
XLOC_005240	XLOC_005240	LOC_Os01g43320	transmembrane amino acid transporter protein, putative, expressed	4.19615	Up Regulated	Chr1:24753698-24758861	HCR1	H48	OK	5.60006	102.65	3.90591	0.00135	0.0399802	yes
XLOC_053036	XLOC_053036	LOC_Os08g35630	MTD1, putative, expressed	4.21126	Up Regulated	Chr8:22462393-22464901	HCR1	H48	OK	4.2349	78.4437	4.07563	0.00295	0.0682728	no
XLOC_062971	XLOC_062971	LOC_Os09g39770	C2 domain containing protein, putative, expressed	4.24979	Up Regulated	Chr9:22804667-22807049	HCR1	H48	OK	2.45516	46.7085	3.62058	0.00145	0.0409502	yes
XLOC_002294	XLOC_002294	LOC_Os01g51570	glycosyl hydrolases family 17, putative, expressed	4.2864	Up Regulated	Chr1:29620953-29622393	HCR1	H48	OK	7.06728	137.907	3.98909	0.0006	0.0268165	yes
XLOC_053572	XLOC_053572	LOC_Os08g02230	FAD-binding and arabino-lactone oxidase domains containing protein, putative, expressed	4.30057	Up Regulated	Chr8:767545-770948	HCR1	H48	OK	2.52729	49.8032	4.56628	0.0003	0.0170603	yes
XLOC_011983	XLOC_011983	LOC_Os11g29710	OsFBO4 - F-box and other domain containing protein, expressed	4.32616	Up Regulated	Chr11:17229937-17231917	HCR1	H48	OK	4.28733	85.9983	4.0382	0.0001	0.00743766	yes
XLOC_056241	XLOC_056241	LOC_Os09g10010	expressed protein	4.32829	Up Regulated	Chr9:5454022-5455007	HCR1	H48	OK	4.70388	94.493	3.81341	0.0026	0.0617368	no
XLOC_027185	XLOC_027185	LOC_Os03g46200	acetyltransferase, GNAT family, putative, expressed	4.34178	Up Regulated	Chr3:26119967-26120832	HCR1	H48	OK	3.5691	72.371	3.62212	0.0011	0.0352169	yes
XLOC_037288	XLOC_037288	LOC_Os05g11320	metallothionein-like protein 3B, putative, expressed	4.36	Up Regulated	Chr5:6393879-6396096	HCR1	H48	OK	233.877	4802.62	4.07076	0.0018	0.049172	yes
XLOC_027482	XLOC_027482	LOC_Os03g52390	PIII1 - Proteinase inhibitor II family protein precursor, expressed	4.39483	Up Regulated	Chr3:30078323-30078929	HCR1	H48	OK	23.8358	501.422	4.89204	0.0001	0.00743766	yes
XLOC_048447	XLOC_048447	LOC_Os07g39020	OsSub53 - Putative Subtilisin homologue, expressed	4.40114	Up Regulated	Chr7:23398208-23400655	HCR1	H48	OK	6.25911	132.247	4.59411	0.00015	0.0100793	yes
XLOC_009590	XLOC_009590	LOC_Os10g21352	chloroplast 30S ribosomal protein S19, putative, expressed	4.41275	Up Regulated	Chr10:10887699-10888137	HCR1	H48	OK	6.56187	139.764	3.31248	0.00135	0.0399802	yes
XLOC_001868	XLOC_001868	LOC_Os01g42860	inhibitor I family protein, putative, expressed	4.47795	Up Regulated	Chr1:24392840-24393423	HCR1	H48	OK	7.39583	164.81	3.88655	0.0016	0.0444563	yes
XLOC_016855	XLOC_016855	LOC_Os12g36880	pathogenesis-related Bet v I family protein, putative, expressed	4.50304	Up Regulated	Chr12:22599951-22602386	HCR1	H48	OK	110.969	2516.24	4.27079	0.00155	0.0433555	yes
XLOC_001159	XLOC_001159	LOC_Os01g27140	OsGrx_C7 - glutaredoxin subgroup III, expressed	4.50892	Up Regulated	Chr1:15124630-15125398	HCR1	H48	OK	10.6299	242.019	4.55954	0.00025	0.0149744	yes
XLOC_018683	XLOC_018683	LOC_Os12g32290	expressed protein	4.52849	Up Regulated	Chr12:19495190-19496156	HCR1	H48	OK	16.8158	388.087	5.10055	5e-05	0.00429853	yes
XLOC_030661	XLOC_030661	LOC_Os03g61160	expressed protein	4.54474	Up Regulated	Chr3:34739005-34740723	HCR1	H48	OK	4.85391	113.291	4.44616	0.00545	0.099416	no
XLOC_018612	XLOC_018612	LOC_Os12g30824	terpene synthase, putative, expressed	4.54815	Up Regulated	Chr12:18509842-18528700	HCR1	H48	OK	0.706862	16.5373	3.59392	0.0021	0.0541774	no
XLOC_026127	XLOC_026127	LOC_Os03g20330	VQ domain containing protein, putative, expressed	4.5989	Up Regulated	Chr3:11497785-11498677	HCR1	H48	OK	5.31286	128.746	4.08642	0.0021	0.0541774	no
XLOC_002609	XLOC_002609	LOC_Os01g58049	photosystem I assembly protein ycf4, putative, expressed	4.66273	Up Regulated	Chr1:33578191-33579270	HCR1	H48	OK	2.42116	61.3259	3.70191	0.0023	0.0561646	no
XLOC_041318	XLOC_041318	LOC_Os05g50100	expressed protein	4.66631	Up Regulated	Chr5:28710319-28711241	HCR1	H48	OK	3.95839	100.512	4.0293	0.0011	0.0352169	yes
XLOC_023923	XLOC_023923	LOC_Os02g39320	hypothetical protein	4.70673	Up Regulated	Chr2:23741836-23744109	HCR1	H48	OK	3.23029	84.3545	4.15332	0.0012	0.0377567	yes
XLOC_023923	XLOC_023923	LOC_Os02g39330	CHIT1 - Chitinase family protein precursor, expressed	4.70673	Up Regulated	Chr2:23741836-23744109	HCR1	H48	OK	3.23029	84.3545	4.15332	0.0012	0.0377567	yes
XLOC_029973	XLOC_029973	LOC_Os03g45960	thaumatin, putative, expressed	4.73543	Up Regulated	Chr3:25972224-25973470	HCR1	H48	OK	5.0052	133.33	4.12847	0.0028	0.0653184	no
XLOC_049064	XLOC_049064	LOC_Os07g02330	protein phosphatase 2C, putative, expressed	4.79375	Up Regulated	Chr7:780383-781950	HCR1	H48	OK	2.41687	67.0373	4.02916	0.00115	0.0363793	yes
XLOC_024141	XLOC_024141	LOC_Os02g43790	ethylene-responsive transcription factor, putative, expressed	4.80057	Up Regulated	Chr2:26422181-26423485	HCR1	H48	OK	10.8357	301.975	4.63151	0.0005	0.0238029	yes
XLOC_034157	XLOC_034157	LOC_Os04g10000	sex determination protein tasselseed-2, putative, expressed	4.8473	Up Regulated	Chr4:5380094-5381565	HCR1	H48	OK	3.24712	93.4717	4.31398	0.00135	0.0399802	yes
XLOC_008656	XLOC_008656	LOC_Os10g41330	AP2 domain containing protein, expressed	5.08721	Up Regulated	Chr10:22213114-22214678	HCR1	H48	OK	2.43855	82.8963	4.24403	0.00025	0.0149744	yes
XLOC_044503	XLOC_044503	LOC_Os06g11210	12-oxophytodienoate reductase, putative, expressed	5.09958	Up Regulated	Chr6:5884473-5886141	HCR1	H48	OK	1.38923	47.6321	4.31059	0.00115	0.0363793	yes
XLOC_048696	XLOC_048696	LOC_Os07g43800	EF hand family protein, putative, expressed	5.11986	Up Regulated	Chr7:26208528-26209471	HCR1	H48	OK	6.73876	234.321	4.33088	0.00195	0.050937	no
XLOC_034162	XLOC_034162	LOC_Os04g10060	ent-kaurene synthase, chloroplast precursor, putative, expressed	5.26194	Up Regulated	Chr4:5428337-5434028	HCR1	H48	OK	1.12049	42.9941	5.27659	5e-05	0.00429853	yes
XLOC_008246	XLOC_008246	LOC_Os10g32580	GDSL-like lipase/acylhydrolase, putative, expressed	5.31094	Up Regulated	Chr10:17070917-17072621	HCR1	H48	OK	2.8605	113.552	4.95641	0.0012	0.0377567	yes
XLOC_016280	XLOC_016280	LOC_Os12g24650	leucine aminopeptidase, chloroplast precursor, putative, expressed	5.32845	Up Regulated	Chr12:14108974-14114508	HCR1	H48	OK	0.820403	32.9648	4.67604	0.00915	0.136456	no
XLOC_008689	XLOC_008689	LOC_Os10g42020	RALFL29 - Rapid ALkalinization Factor RALF family protein precursor, expressed	5.35708	Up Regulated	Chr10:22587835-22592221	HCR1	H48	OK	23.5134	963.73	5.23322	5e-05	0.00429853	yes
XLOC_003012	XLOC_003012	LOC_Os01g66100	gibberellin 20 oxidase 2, putative, expressed	5.40515	Up Regulated	Chr1:38382381-38385551	HCR1	H48	OK	2.24094	94.9606	4.58886	0.0003	0.0170603	yes
XLOC_008051	XLOC_008051	LOC_Os10g28080	glycosyl hydrolase, putative, expressed	5.49402	Up Regulated	Chr10:14589925-14591220	HCR1	H48	OK	4.22609	190.46	4.84044	0.002	0.0521034	no
XLOC_018286	XLOC_018286	LOC_Os12g23980	OsSub63 - Putative Subtilisin homologue, expressed	5.50386	Up Regulated	Chr12:13625243-13627725	HCR1	H48	OK	0.432637	19.6313	3.91809	0.0004	0.020991	yes
XLOC_034155	XLOC_034155	LOC_Os04g09920	cytochrome P450, putative, expressed	5.50553	Up Regulated	Chr4:5332328-5334479	HCR1	H48	OK	1.13295	51.4683	4.64268	0.0008	0.0291957	yes
XLOC_031488	XLOC_031488	LOC_Os04g10160	cytochrome P450, putative, expressed	5.54688	Up Regulated	Chr4:5484767-5486773	HCR1	H48	OK	2.29998	107.523	4.98478	5e-05	0.00429853	yes
XLOC_054706	XLOC_054706	LOC_Os08g26230	expressed protein	5.74048	Up Regulated	Chr8:15983956-15991706	HCR1	H48	OK	8.31554	444.576	5.40132	5e-05	0.00429853	yes
XLOC_057131	XLOC_057131	LOC_Os09g29690	beta-expansin precursor, putative, expressed	5.75482	Up Regulated	Chr9:18058252-18059176	HCR1	H48	OK	8.88884	479.975	5.03789	0.0008	0.0291957	yes
XLOC_045660	XLOC_045660	LOC_Os06g35700	reticuline oxidase-like protein precursor, putative, expressed	5.84688	Up Regulated	Chr6:20832431-20834494	HCR1	H48	OK	1.79426	103.269	4.99322	0.00045	0.0222941	yes
XLOC_038239	XLOC_038239	LOC_Os05g33130	CHIT17 - Chitinase family protein precursor, expressed	5.91768	Up Regulated	Chr5:19426415-19427875	HCR1	H48	OK	6.95684	420.545	6.0626	5e-05	0.00429853	yes
XLOC_007780	XLOC_007780	LOC_Os10g21268	ribulose bisphosphate carboxylase large chain precursor, putative, expressed	6.02989	Up Regulated	Chr10:10861157-10862712	HCR1	H48	OK	10.3703	677.593	4.421	0.0029	0.0672754	no
XLOC_037485	XLOC_037485	LOC_Os05g15880	glycosyl hydrolase, putative, expressed	6.0978	Up Regulated	Chr5:8959414-8960578	HCR1	H48	OK	8.36689	573.041	5.81679	0.0002	0.0124383	yes
XLOC_018725	XLOC_018725	LOC_Os12g33150	expressed protein	6.13501	Up Regulated	Chr12:20058110-20059618	HCR1	H48	OK	21.2152	1490.98	5.06271	0.00035	0.0191224	yes
XLOC_016852	XLOC_016852	LOC_Os12g36850	pathogenesis-related Bet v I family protein, putative, expressed	6.51689	Up Regulated	Chr12:22591675-22593522	HCR1	H48	OK	10.2992	943.15	6.36011	5e-05	0.00429853	yes
XLOC_031477	XLOC_031477	LOC_Os04g09900	ent-kaurene synthase, chloroplast precursor, putative, expressed	6.51704	Up Regulated	Chr4:5318059-5326427	HCR1	H48	OK	1.16811	106.982	5.3653	0.0001	0.00743766	yes
XLOC_016850	XLOC_016850	LOC_Os12g36830	pathogenesis-related Bet v I family protein, putative, expressed	6.67036	Up Regulated	Chr12:22580777-22581972	HCR1	H48	OK	20.3275	2070.44	6.78449	5e-05	0.00429853	yes
XLOC_003997	XLOC_003997	LOC_Os01g13610	isoflavone reductase homolog IRL, putative, expressed	6.74394	Up Regulated	Chr1:7619079-7624561	HCR1	H48	OK	1.67612	179.652	5.72206	0.00035	0.0191224	yes
XLOC_051732	XLOC_051732	LOC_Os08g08960	Cupin domain containing protein, expressed	6.89732	Up Regulated	Chr8:5208384-5209569	HCR1	H48	OK	6.04497	720.601	4.14804	0.004	0.0793216	no
XLOC_023270	XLOC_023270	LOC_Os02g25640	glutelin, putative, expressed	7.42718	Up Regulated	Chr2:14991647-14993715	HCR1	H48	OK	1.36116	234.269	5.07645	0.0003	0.0170603	yes
XLOC_025960	XLOC_025960	LOC_Os03g17200	plant-specific domain TIGR01589 family protein, expressed	7.92768	Up Regulated	Chr3:9574985-9579071	HCR1	H48	OK	7.49589	1825.13	1.70051	0.00025	0.0149744	yes
XLOC_026601	XLOC_026601	LOC_Os03g31360	glutelin, putative, expressed	8.55197	Up Regulated	Chr3:17864277-17866253	HCR1	H48	OK	1.79225	672.663	5.02523	0.0001	0.00743766	yes
XLOC_014232	XLOC_014232	LOC_Os11g31540	BRASSINOSTEROID INSENSITIVE 1-associated receptor kinase 1 precursor, putative, expressed	8.56355	Up Regulated	Chr11:18430455-18432558	HCR1	H48	OK	1.75079	662.397	6.75632	0.00045	0.0222941	yes
XLOC_000248	XLOC_000248	LOC_Os01g06060	gibberellin receptor GID1L2, putative, expressed	INF	Up Regulated	Chr1:2896684-2898069	HCR1	H48	OK	0	2.40479	#NAME?	0.00045	0.0222941	yes
XLOC_004028	XLOC_004028	LOC_Os01g14310	expressed protein	INF	Up Regulated	Chr1:8016551-8019035	HCR1	H48	OK	0	0.759372	#NAME?	0.0032	0.0727341	no
XLOC_001224	XLOC_001224	LOC_Os01g28580	expressed protein	INF	Up Regulated	Chr1:15992758-15996844	HCR1	H48	OK	0	0.475204	#NAME?	0.0005	0.0238029	yes
XLOC_001258	XLOC_001258	LOC_Os01g29280	expressed protein	INF	Up Regulated	Chr1:16415040-16416138	HCR1	H48	OK	0	2.59565	#NAME?	5e-05	0.00429853	yes
XLOC_005004	XLOC_005004	LOC_Os01g38110	cytochrome P450, putative, expressed	INF	Up Regulated	Chr1:21342128-21344066	HCR1	H48	OK	0	19.6716	#NAME?	5e-05	0.00429853	yes
XLOC_005005	XLOC_005005	LOC_Os01g38120	plant protein of unknown function domain containing protein, expressed	INF	Up Regulated	Chr1:21348035-21349674	HCR1	H48	OK	0	1.0992	#NAME?	0.00025	0.0149744	yes
XLOC_005105	XLOC_005105	LOC_Os01g40430	WRKY27, expressed	INF	Up Regulated	Chr1:22824808-22827116	HCR1	H48	OK	0	3.90516	#NAME?	5e-05	0.00429853	yes
XLOC_005124	XLOC_005124	LOC_Os01g40790	retrotransposon protein, putative, Ty3-gypsy subclass	INF	Up Regulated	Chr1:23049133-23050037	HCR1	H48	OK	0	25.0853	#NAME?	0.0002	0.0124383	yes
XLOC_002015	XLOC_002015	LOC_Os01g46220	GDSL-like lipase/acylhydrolase, putative, expressed	INF	Up Regulated	Chr1:26290149-26292389	HCR1	H48	OK	0	11.7018	#NAME?	5e-05	0.00429853	yes
XLOC_005540	XLOC_005540	LOC_Os01g50480	SAM dependent carboxyl methyltransferase, putative, expressed	INF	Up Regulated	Chr1:28984542-28986016	HCR1	H48	OK	0	1.88675	#NAME?	5e-05	0.00429853	yes
XLOC_002343	XLOC_002343	LOC_Os01g52514	B3 DNA binding domain containing protein, expressed	INF	Up Regulated	Chr1:30173441-30179151	HCR1	H48	OK	0	0.619303	#NAME?	0.00155	0.0433555	yes
XLOC_002395	XLOC_002395	LOC_Os01g53650	zinc finger CCCH type family protein, putative, expressed	INF	Up Regulated	Chr1:30824688-30825670	HCR1	H48	OK	0	1.0003	#NAME?	0.00105	0.0341017	yes
XLOC_005684	XLOC_005684	LOC_Os01g54140	expressed protein	INF	Up Regulated	Chr1:31134251-31137138	HCR1	H48	OK	0	3.70219	#NAME?	0.0004	0.020991	yes
XLOC_002618	XLOC_002618	LOC_Os01g58320	expressed protein	INF	Up Regulated	Chr1:33703401-33703860	HCR1	H48	OK	0	8.73325	#NAME?	0.00055	0.0253173	yes
XLOC_005911	XLOC_005911	LOC_Os01g58860	auxin efflux carrier component, putative, expressed	INF	Up Regulated	Chr1:34003663-34006460	HCR1	H48	OK	0	1.05586	#NAME?	0.0003	0.0170603	yes
XLOC_002902	XLOC_002902	LOC_Os01g63920	hypothetical protein	INF	Up Regulated	Chr1:37093342-37093708	HCR1	H48	OK	0	2.75309	#NAME?	0.00045	0.0222941	yes
XLOC_003035	XLOC_003035	LOC_Os01g66640	S-domain receptor-like protein kinase, putative, expressed	INF	Up Regulated	Chr1:38704700-38707473	HCR1	H48	OK	0	0.825588	#NAME?	5e-05	0.00429853	yes
XLOC_006297	XLOC_006297	LOC_Os01g66990	expressed protein	INF	Up Regulated	Chr1:38904008-38909598	HCR1	H48	OK	0	2.01268	#NAME?	5e-05	0.00429853	yes
XLOC_006303	XLOC_006303	LOC_Os01g67134	ribosomal L18p/L5e family protein, putative, expressed	INF	Up Regulated	Chr1:38968281-38976498	HCR1	H48	OK	0	53.3415	#NAME?	0.0073	0.116042	no
XLOC_003110	XLOC_003110	LOC_Os01g68420	OsMADS97 - MADS-box family gene with M-beta type-box, expressed	INF	Up Regulated	Chr1:39762895-39763714	HCR1	H48	OK	0	1.27825	#NAME?	0.001	0.0329538	yes
XLOC_003123	XLOC_003123	LOC_Os01g68660	cysteine proteinase inhibitor precursor protein, putative, expressed	INF	Up Regulated	Chr1:39876457-39877243	HCR1	H48	OK	0	3.35951	#NAME?	5e-05	0.00429853	yes
XLOC_003129	XLOC_003129	LOC_Os01g68820	expressed protein	INF	Up Regulated	Chr1:39985222-39986498	HCR1	H48	OK	0	21.5289	#NAME?	5e-05	0.00429853	yes
XLOC_003360	XLOC_003360	LOC_Os01g74140	WRKY17, expressed	INF	Up Regulated	Chr1:42946752-42948750	HCR1	H48	OK	0	1.19222	#NAME?	0.0001	0.00743766	yes
XLOC_019803	XLOC_019803	LOC_Os02g07550	DEFL1 - Defensin and Defensin-like DEFL family, expressed	INF	Up Regulated	Chr2:3909436-3910014	HCR1	H48	OK	0	27.898	#NAME?	5e-05	0.00429853	yes
XLOC_019874	XLOC_019874	LOC_Os02g09320	cytochrome P450, putative, expressed	INF	Up Regulated	Chr2:4795621-4802382	HCR1	H48	OK	0	8.35066	#NAME?	5e-05	0.00429853	yes
XLOC_019874	XLOC_019874	LOC_Os02g09330	cytochrome P450, putative, expressed	INF	Up Regulated	Chr2:4795621-4802382	HCR1	H48	OK	0	8.35066	#NAME?	5e-05	0.00429853	yes
XLOC_019990	XLOC_019990	LOC_Os02g12530	cytochrome P450 71D6, putative, expressed	INF	Up Regulated	Chr2:6553510-6558142	HCR1	H48	OK	0	1.22657	#NAME?	5e-05	0.00429853	yes
XLOC_019990	XLOC_019990	LOC_Os02g12540	cytochrome P450, putative, expressed	INF	Up Regulated	Chr2:6553510-6558142	HCR1	H48	OK	0	1.22657	#NAME?	5e-05	0.00429853	yes
XLOC_022796	XLOC_022796	LOC_Os02g15000	zinc finger, C3HC4 type domain containing protein, expressed	INF	Up Regulated	Chr2:8367221-8368328	HCR1	H48	OK	0	2.68406	#NAME?	5e-05	0.00429853	yes
XLOC_020127	XLOC_020127	LOC_Os02g15140	retrotransposon protein, putative, unclassified, expressed	INF	Up Regulated	Chr2:8433457-8436707	HCR1	H48	OK	0	9.28451	#NAME?	5e-05	0.00429853	yes
XLOC_022806	XLOC_022806	LOC_Os02g15178	glutelin, putative, expressed	INF	Up Regulated	Chr2:8458525-8460664	HCR1	H48	OK	0	2.221	#NAME?	5e-05	0.00429853	yes
XLOC_022808	XLOC_022808	LOC_Os02g15250	late embryogenesis abundant domain-containing protein, putative, expressed	INF	Up Regulated	Chr2:8516599-8518271	HCR1	H48	OK	0	5.76331	#NAME?	5e-05	0.00429853	yes
XLOC_022836	XLOC_022836	LOC_Os02g15740	expressed protein	INF	Up Regulated	Chr2:8869107-8871520	HCR1	H48	OK	0	1.51317	#NAME?	0.0001	0.00743766	yes
XLOC_022872	XLOC_022872	LOC_Os02g16809	expansin precursor, putative, expressed	INF	Up Regulated	Chr2:9589065-9590040	HCR1	H48	OK	0	1.6936	#NAME?	0.0006	0.0268165	yes
XLOC_020750	XLOC_020750	LOC_Os02g28580	expressed protein	INF	Up Regulated	Chr2:16915458-16919296	HCR1	H48	OK	0	1.30746	#NAME?	5e-05	0.00429853	yes
XLOC_020776	XLOC_020776	LOC_Os02g29010	retrotransposon protein, putative, unclassified, expressed	INF	Up Regulated	Chr2:17167416-17172740	HCR1	H48	OK	0	0.787208	#NAME?	5e-05	0.00429853	yes
XLOC_021245	XLOC_021245	LOC_Os02g39620	ATOZI1, putative, expressed	INF	Up Regulated	Chr2:23903893-23905003	HCR1	H48	OK	0	5.09736	#NAME?	5e-05	0.00429853	yes
XLOC_021251	XLOC_021251	LOC_Os02g39670	retrotransposon, putative, centromere-specific, expressed	INF	Up Regulated	Chr2:23965763-23968588	HCR1	H48	OK	0	0.5992	#NAME?	0.00065	0.0282221	yes
XLOC_021325	XLOC_021325	LOC_Os02g41850	expressed protein	INF	Up Regulated	Chr2:25156548-25161462	HCR1	H48	OK	0	0.48471	#NAME?	0.0005	0.0238029	yes
XLOC_021432	XLOC_021432	LOC_Os02g44106	expansin precursor, putative, expressed	INF	Up Regulated	Chr2:26638623-26639988	HCR1	H48	OK	0	4.48134	#NAME?	5e-05	0.00429853	yes
XLOC_024436	XLOC_024436	LOC_Os02g49410	histone-like transcription factor and archaeal histone, putative, expressed	INF	Up Regulated	Chr2:30191470-30192489	HCR1	H48	OK	0	24.654	#NAME?	5e-05	0.00429853	yes
XLOC_024691	XLOC_024691	LOC_Os02g54390	hypro1, putative, expressed	INF	Up Regulated	Chr2:33330508-33331432	HCR1	H48	OK	0	16.3446	#NAME?	5e-05	0.00429853	yes
XLOC_022057	XLOC_022057	LOC_Os02g56630	OsWAK24 - OsWAK receptor-like protein kinase, expressed	INF	Up Regulated	Chr2:34720865-34723359	HCR1	H48	OK	0	0.769183	#NAME?	5e-05	0.00429853	yes
XLOC_028245	XLOC_028245	LOC_Os03g05890	expressed protein	INF	Up Regulated	Chr3:2955832-2956258	HCR1	H48	OK	0	3.75671	#NAME?	0.0006	0.0268165	yes
XLOC_028338	XLOC_028338	LOC_Os03g07940	AP2 domain containing protein, expressed	INF	Up Regulated	Chr3:4056778-4061467	HCR1	H48	OK	0	0.664908	#NAME?	5e-05	0.00429853	yes
XLOC_026325	XLOC_026325	LOC_Os03g25040	GDSL-like lipase/acylhydrolase, putative, expressed	INF	Up Regulated	Chr3:14294506-14297898	HCR1	H48	OK	0	1.75468	#NAME?	0.0002	0.0124383	yes
XLOC_029561	XLOC_029561	LOC_Os03g37290	cytochrome P450, putative, expressed	INF	Up Regulated	Chr3:20665847-20670823	HCR1	H48	OK	0	14.6321	#NAME?	5e-05	0.00429853	yes
XLOC_029595	XLOC_029595	LOC_Os03g37930	potassium transporter, putative, expressed	INF	Up Regulated	Chr3:21060412-21064968	HCR1	H48	OK	0	0.842917	#NAME?	0.00015	0.0100793	yes
XLOC_029671	XLOC_029671	LOC_Os03g39520	plant protein of unknown function domain containing protein, expressed	INF	Up Regulated	Chr3:21950473-21953062	HCR1	H48	OK	0	0.650339	#NAME?	0.0004	0.020991	yes
XLOC_029702	XLOC_029702	LOC_Os03g40130	universal stress protein domain containing protein, putative, expressed	INF	Up Regulated	Chr3:22298589-22300150	HCR1	H48	OK	0	1.90166	#NAME?	5e-05	0.00429853	yes
XLOC_026944	XLOC_026944	LOC_Os03g40440	B12D protein, putative, expressed	INF	Up Regulated	Chr3:22464517-22470146	HCR1	H48	OK	0	4.44208	#NAME?	5e-05	0.00429853	yes
XLOC_029852	XLOC_029852	LOC_Os03g43524	expressed protein	INF	Up Regulated	Chr3:24283866-24284737	HCR1	H48	OK	0	11.1902	#NAME?	0.0008	0.0291957	yes
XLOC_029880	XLOC_029880	LOC_Os03g44050	OsWAK27 - OsWAK receptor-like protein kinase, expressed	INF	Up Regulated	Chr3:24759258-24763495	HCR1	H48	OK	0	0.656352	#NAME?	0.0004	0.020991	yes
XLOC_027122	XLOC_027122	LOC_Os03g44642	zinc finger, C3HC4 type domain containing protein, expressed	INF	Up Regulated	Chr3:25137133-25137628	HCR1	H48	OK	0	1.11229	#NAME?	0.00455	0.0881355	no
XLOC_027169	XLOC_027169	LOC_Os03g45850	OsSAUR16 - Auxin-responsive SAUR gene family member, expressed	INF	Up Regulated	Chr3:25893199-25894879	HCR1	H48	OK	0	2.35959	#NAME?	0.0011	0.0352169	yes
XLOC_027307	XLOC_027307	LOC_Os03g48740	indole-3-acetate beta-glucosyltransferase, putative, expressed	INF	Up Regulated	Chr3:27775339-27778427	HCR1	H48	OK	0	6.63088	#NAME?	5e-05	0.00429853	yes
XLOC_030108	XLOC_030108	LOC_Os03g48750	Cupin domain containing protein, expressed	INF	Up Regulated	Chr3:27779085-27780096	HCR1	H48	OK	0	8.36581	#NAME?	5e-05	0.00429853	yes
XLOC_030296	XLOC_030296	LOC_Os03g52990	hypothetical protein	INF	Up Regulated	Chr3:30392452-30392875	HCR1	H48	OK	0	3.15305	#NAME?	0.00455	0.0881355	no
XLOC_030393	XLOC_030393	LOC_Os03g55734	SSA3 - 2S albumin seed storage family protein precursor, expressed	INF	Up Regulated	Chr3:31732514-31733054	HCR1	H48	OK	0	7.52887	#NAME?	5e-05	0.00429853	yes
XLOC_027724	XLOC_027724	LOC_Os03g58030	acetyltransferase, GNAT family, putative, expressed	INF	Up Regulated	Chr3:33037472-33037982	HCR1	H48	OK	0	11.4924	#NAME?	5e-05	0.00429853	yes
XLOC_027767	XLOC_027767	LOC_Os03g59010	Cupin domain containing protein, expressed	INF	Up Regulated	Chr3:33588716-33592077	HCR1	H48	OK	0	55.9248	#NAME?	5e-05	0.00429853	yes
XLOC_030728	XLOC_030728	LOC_Os03g62590	oxidoreductase, short chain dehydrogenase/reductase family domain containing protein, expressed	INF	Up Regulated	Chr3:35428587-35430487	HCR1	H48	OK	0	1.55527	#NAME?	0.00015	0.0100793	yes
XLOC_033775	XLOC_033775	LOC_Os04g01950	legume lectins beta domain containing protein, putative, expressed	INF	Up Regulated	Chr4:593317-594453	HCR1	H48	OK	0	3.95079	#NAME?	5e-05	0.00429853	yes
XLOC_034168	XLOC_034168	LOC_Os04g10150	expressed protein	INF	Up Regulated	Chr4:5483440-5484258	HCR1	H48	OK	0	1.55086	#NAME?	0.00075	0.0286569	yes
XLOC_034296	XLOC_034296	LOC_Os04g12690	N-hydroxythioamide S-beta-glucosyltransferase, putative, expressed	INF	Up Regulated	Chr4:7024799-7028115	HCR1	H48	OK	0	2.06037	#NAME?	0.0007	0.0282221	yes
XLOC_034428	XLOC_034428	LOC_Os04g15740	DEFL50 - Defensin and Defensin-like DEFL family, expressed	INF	Up Regulated	Chr4:8555453-8555965	HCR1	H48	OK	0	27.6587	#NAME?	5e-05	0.00429853	yes
XLOC_031749	XLOC_031749	LOC_Os04g16732	NADPH-dependent oxidoreductase, putative, expressed	INF	Up Regulated	Chr4:9093589-9203733	HCR1	H48	OK	0	2.53098	#NAME?	0.0029	0.0672754	no
XLOC_031920	XLOC_031920	LOC_Os04g19960	retrotransposon protein, putative, unclassified, expressed	INF	Up Regulated	Chr4:11130543-11131502	HCR1	H48	OK	0	2.40235	#NAME?	0.00025	0.0149744	yes
XLOC_034987	XLOC_034987	LOC_Os04g27400	terpene synthase, putative, expressed	INF	Up Regulated	Chr4:16187035-16192850	HCR1	H48	OK	0	3.42021	#NAME?	5e-05	0.00429853	yes
XLOC_035012	XLOC_035012	LOC_Os04g27760	terpene synthase, putative, expressed	INF	Up Regulated	Chr4:16407247-16411320	HCR1	H48	OK	0	6.92966	#NAME?	5e-05	0.00429853	yes
XLOC_035108	XLOC_035108	LOC_Os04g30250	wall-associated receptor kinase-like 5 precursor, putative, expressed	INF	Up Regulated	Chr4:18053115-18057610	HCR1	H48	OK	0	1.51755	#NAME?	5e-05	0.00429853	yes
XLOC_035278	XLOC_035278	LOC_Os04g34030	U-box domain-containing protein, putative, expressed	INF	Up Regulated	Chr4:20610144-20611500	HCR1	H48	OK	0	1.92668	#NAME?	0.00065	0.0282221	yes
XLOC_032652	XLOC_032652	LOC_Os04g35000	expressed protein	INF	Up Regulated	Chr4:21271522-21274076	HCR1	H48	OK	0	1.11587	#NAME?	0.00015	0.0100793	yes
XLOC_033070	XLOC_033070	LOC_Os04g45060	MYB family transcription factor, putative, expressed	INF	Up Regulated	Chr4:26659738-26661778	HCR1	H48	OK	0	0.937199	#NAME?	0.0006	0.0268165	yes
XLOC_033071	XLOC_033071	LOC_Os04g45100	expressed protein	INF	Up Regulated	Chr4:26677988-26678719	HCR1	H48	OK	0	2.23536	#NAME?	0.0001	0.00743766	yes
XLOC_036126	XLOC_036126	LOC_Os04g52510	glucosyltransferase, putative, expressed	INF	Up Regulated	Chr4:31223395-31224544	HCR1	H48	OK	0	1.46631	#NAME?	0.0005	0.0238029	yes
XLOC_036889	XLOC_036889	LOC_Os05g02610	expressed protein	INF	Up Regulated	Chr5:909667-910526	HCR1	H48	OK	0	3.71909	#NAME?	0.0002	0.0124383	yes
XLOC_039298	XLOC_039298	LOC_Os05g04870	oxidoreductase, short chain dehydrogenase/reductase family protein, putative, expressed	INF	Up Regulated	Chr5:2345387-2346843	HCR1	H48	OK	0	17.1721	#NAME?	5e-05	0.00429853	yes
XLOC_039302	XLOC_039302	LOC_Os05g04930	transferase family protein, putative, expressed	INF	Up Regulated	Chr5:2373885-2376419	HCR1	H48	OK	0	1.79161	#NAME?	0.0001	0.00743766	yes
XLOC_039316	XLOC_039316	LOC_Os05g05110	expressed protein	INF	Up Regulated	Chr5:2482187-2482637	HCR1	H48	OK	0	3.71468	#NAME?	0.00055	0.0253173	yes
XLOC_039732	XLOC_039732	LOC_Os05g14260	peroxidase precursor, putative, expressed	INF	Up Regulated	Chr5:8005818-8007251	HCR1	H48	OK	0	4.21349	#NAME?	0.0001	0.00743766	yes
XLOC_037486	XLOC_037486	LOC_Os05g15920	glycosyl hydrolase, putative, expressed	INF	Up Regulated	Chr5:8981787-8982956	HCR1	H48	OK	0	11.1599	#NAME?	5e-05	0.00429853	yes
XLOC_037911	XLOC_037911	LOC_Os05g25914	expressed protein	INF	Up Regulated	Chr5:15076549-15077125	HCR1	H48	OK	0	1.79522	#NAME?	0.00075	0.0286569	yes
XLOC_037940	XLOC_037940	LOC_Os05g26460	PROLM11 - Prolamin precursor, expressed	INF	Up Regulated	Chr5:15384834-15385500	HCR1	H48	OK	0	21.3597	#NAME?	5e-05	0.00429853	yes
XLOC_037953	XLOC_037953	LOC_Os05g26620	PROLM14 - Prolamin precursor, putative, expressed	INF	Up Regulated	Chr5:15464453-15465082	HCR1	H48	OK	0	27.9749	#NAME?	5e-05	0.00429853	yes
XLOC_040287	XLOC_040287	LOC_Os05g26690	PROLM15 - Prolamin precursor, putative, expressed	INF	Up Regulated	Chr5:15502492-15502954	HCR1	H48	OK	0	14.5594	#NAME?	5e-05	0.00429853	yes
XLOC_040288	XLOC_040288	LOC_Os05g26720	PROLM16 - Prolamin precursor, expressed	INF	Up Regulated	Chr5:15512512-15513163	HCR1	H48	OK	0	4.76088	#NAME?	0.00025	0.0149744	yes
XLOC_040289	XLOC_040289	LOC_Os05g26750	PROLM17 - Prolamin precursor, expressed	INF	Up Regulated	Chr5:15524252-15524996	HCR1	H48	OK	0	13.4455	#NAME?	5e-05	0.00429853	yes
XLOC_040345	XLOC_040345	LOC_Os05g27800	expressed protein	INF	Up Regulated	Chr5:16202766-16203195	HCR1	H48	OK	0	4.59662	#NAME?	0.0002	0.0124383	yes
XLOC_038148	XLOC_038148	LOC_Os05g31380	GRAS family transcription factor containing protein, expressed	INF	Up Regulated	Chr5:18234845-18236501	HCR1	H48	OK	0	1.19475	#NAME?	0.0002	0.0124383	yes
XLOC_040503	XLOC_040503	LOC_Os05g31470	expressed protein	INF	Up Regulated	Chr5:18306859-18307985	HCR1	H48	OK	0	1.4364	#NAME?	0.0002	0.0124383	yes
XLOC_040546	XLOC_040546	LOC_Os05g32460	VQ domain containing protein, putative, expressed	INF	Up Regulated	Chr5:18958613-18960147	HCR1	H48	OK	0	1.32367	#NAME?	0.00015	0.0100793	yes
XLOC_038639	XLOC_038639	LOC_Os05g41920	expressed protein	INF	Up Regulated	Chr5:24551180-24551846	HCR1	H48	OK	0	3.00383	#NAME?	0.00015	0.0100793	yes
XLOC_038853	XLOC_038853	LOC_Os05g46150	OsFBDUF28 - F-box and DUF domain containing protein, expressed	INF	Up Regulated	Chr5:26768462-26769698	HCR1	H48	OK	0	0.955553	#NAME?	5e-05	0.00429853	yes
XLOC_038963	XLOC_038963	LOC_Os05g48740	expressed protein	INF	Up Regulated	Chr5:27935367-27936081	HCR1	H48	OK	0	66.3315	#NAME?	5e-05	0.00429853	yes
XLOC_041706	XLOC_041706	LOC_Os06g02460	expressed protein	INF	Up Regulated	Chr6:850896-852288	HCR1	H48	OK	0	1.29896	#NAME?	0.0001	0.00743766	yes
XLOC_044348	XLOC_044348	LOC_Os06g07700	expressed protein	INF	Up Regulated	Chr6:3723341-3725138	HCR1	H48	OK	0	2.08335	#NAME?	5e-05	0.00429853	yes
XLOC_044351	XLOC_044351	LOC_Os06g07740	myb-like DNA-binding domain, SHAQKYF class family protein, expressed	INF	Up Regulated	Chr6:3747260-3749226	HCR1	H48	OK	0	1.61116	#NAME?	5e-05	0.00429853	yes
XLOC_042078	XLOC_042078	LOC_Os06g09960	expressed protein	INF	Up Regulated	Chr6:5082838-5084091	HCR1	H48	OK	0	1.819	#NAME?	0.00405	0.0800416	no
XLOC_042079	XLOC_042079	LOC_Os06g09970	expressed protein	INF	Up Regulated	Chr6:5085602-5086090	HCR1	H48	OK	0	2.24686	#NAME?	0.0022	0.0561646	no
XLOC_042143	XLOC_042143	LOC_Os06g10910	xyloglucan fucosyltransferase, putative, expressed	INF	Up Regulated	Chr6:5701638-5704991	HCR1	H48	OK	0	1.27545	#NAME?	0.00035	0.0191224	yes
XLOC_044643	XLOC_044643	LOC_Os06g13770	transposon protein, putative, unclassified	INF	Up Regulated	Chr6:7635954-7637290	HCR1	H48	OK	0	0.457412	#NAME?	0.00035	0.0191224	yes
XLOC_044648	XLOC_044648	LOC_Os06g13880	expressed protein	INF	Up Regulated	Chr6:7722723-7723354	HCR1	H48	OK	0	2.7533	#NAME?	0.0002	0.0124383	yes
XLOC_042435	XLOC_042435	LOC_Os06g17480	histone-like transcription factor and archaeal histone, putative, expressed	INF	Up Regulated	Chr6:10137822-10138875	HCR1	H48	OK	0	8.06739	#NAME?	5e-05	0.00429853	yes
XLOC_045029	XLOC_045029	LOC_Os06g21950	inorganic phosphate transporter, putative, expressed	INF	Up Regulated	Chr6:12691974-12694849	HCR1	H48	OK	0	0.82889	#NAME?	0.00035	0.0191224	yes
XLOC_045373	XLOC_045373	LOC_Os06g30280	expressed protein	INF	Up Regulated	Chr6:17470731-17471497	HCR1	H48	OK	0	13.4457	#NAME?	5e-05	0.00429853	yes
XLOC_045516	XLOC_045516	LOC_Os06g32990	peroxidase precursor, putative, expressed	INF	Up Regulated	Chr6:19205567-19207119	HCR1	H48	OK	0	1.15368	#NAME?	0.0009	0.0305186	yes
XLOC_045547	XLOC_045547	LOC_Os06g33640	CAPIP1, putative, expressed	INF	Up Regulated	Chr6:19581997-19606216	HCR1	H48	OK	0	0.483457	#NAME?	0.0008	0.0291957	yes
XLOC_045547	XLOC_045547	LOC_Os06g33690	CAPIP1, putative, expressed	INF	Up Regulated	Chr6:19581997-19606216	HCR1	H48	OK	0	0.483457	#NAME?	0.0008	0.0291957	yes
XLOC_045591	XLOC_045591	LOC_Os06g34530	zinc finger, C3HC4 type domain containing protein, expressed	INF	Up Regulated	Chr6:20087861-20089203	HCR1	H48	OK	0	1.13838	#NAME?	0.0004	0.020991	yes
XLOC_043664	XLOC_043664	LOC_Os06g44360	expressed protein	INF	Up Regulated	Chr6:26777499-26778390	HCR1	H48	OK	0	0.681634	#NAME?	0.0088	0.13259	no
XLOC_043747	XLOC_043747	LOC_Os06g45970	OsSAUR26 - Auxin-responsive SAUR gene family member, expressed	INF	Up Regulated	Chr6:27862247-27862649	HCR1	H48	OK	0	5.27622	#NAME?	0.0003	0.0170603	yes
XLOC_043925	XLOC_043925	LOC_Os06g49620	expressed protein	INF	Up Regulated	Chr6:30028719-30029109	HCR1	H48	OK	0	9.81304	#NAME?	5e-05	0.00429853	yes
XLOC_049024	XLOC_049024	LOC_Os07g01450	DNA directed RNA polymerase, 7 kDa subunit domain containing protein, expressed	INF	Up Regulated	Chr7:292639-294566	HCR1	H48	OK	0	14.9515	#NAME?	5e-05	0.00429853	yes
XLOC_046785	XLOC_046785	LOC_Os07g03580	SCP-like extracellular protein, expressed	INF	Up Regulated	Chr7:1432683-1433407	HCR1	H48	OK	0	3.40062	#NAME?	0.0004	0.020991	yes
XLOC_046787	XLOC_046787	LOC_Os07g03600	SCP-like extracellular protein, expressed	INF	Up Regulated	Chr7:1444312-1445070	HCR1	H48	OK	0	11.6228	#NAME?	5e-05	0.00429853	yes
XLOC_046833	XLOC_046833	LOC_Os07g04560	no apical meristem protein, putative, expressed	INF	Up Regulated	Chr7:2023157-2025061	HCR1	H48	OK	0	6.99139	#NAME?	5e-05	0.00429853	yes
XLOC_046846	XLOC_046846	LOC_Os07g04950	retrotransposon protein, putative, unclassified, expressed	INF	Up Regulated	Chr7:2181827-2182644	HCR1	H48	OK	0	3.88978	#NAME?	5e-05	0.00429853	yes
XLOC_049318	XLOC_049318	LOC_Os07g07860	LTPL76 - Protease inhibitor/seed storage/LTP family protein precursor, expressed	INF	Up Regulated	Chr7:3947967-3949371	HCR1	H48	OK	0	5.63837	#NAME?	0.0002	0.0124383	yes
XLOC_047009	XLOC_047009	LOC_Os07g08240	ZmEBE-1 protein, putative, expressed	INF	Up Regulated	Chr7:4199247-4201268	HCR1	H48	OK	0	2.34603	#NAME?	5e-05	0.00429853	yes
XLOC_049773	XLOC_049773	LOC_Os07g17300	expressed protein	INF	Up Regulated	Chr7:10218277-10220733	HCR1	H48	OK	0	1.09616	#NAME?	5e-05	0.00429853	yes
XLOC_049817	XLOC_049817	LOC_Os07g18180	expressed protein	INF	Up Regulated	Chr7:10775370-10775937	HCR1	H48	OK	0	5.08044	#NAME?	0.00015	0.0100793	yes
XLOC_050320	XLOC_050320	LOC_Os07g30590	LTPL55 - Protease inhibitor/seed storage/LTP family protein precursor, putative, expressed	INF	Up Regulated	Chr7:18102553-18103715	HCR1	H48	OK	0	1.17954	#NAME?	0.00095	0.0318081	yes
XLOC_050370	XLOC_050370	LOC_Os07g31770	chalcone synthase, putative, expressed	INF	Up Regulated	Chr7:18873789-18875926	HCR1	H48	OK	0	1.10548	#NAME?	0.0007	0.0282221	yes
XLOC_048111	XLOC_048111	LOC_Os07g32080	transcription initiation factor IIB, putative, expressed	INF	Up Regulated	Chr7:19068309-19069374	HCR1	H48	OK	0	1.24238	#NAME?	0.00025	0.0149744	yes
XLOC_048559	XLOC_048559	LOC_Os07g41290	DEFL13 - Defensin and Defensin-like DEFL family, expressed	INF	Up Regulated	Chr7:24744454-24745346	HCR1	H48	OK	0	57.8402	#NAME?	5e-05	0.00429853	yes
XLOC_048562	XLOC_048562	LOC_Os07g41350	B12D protein, putative, expressed	INF	Up Regulated	Chr7:24768072-24769164	HCR1	H48	OK	0	19.5309	#NAME?	5e-05	0.00429853	yes
XLOC_048712	XLOC_048712	LOC_Os07g44100	expressed protein	INF	Up Regulated	Chr7:26363029-26363440	HCR1	H48	OK	0	5.12167	#NAME?	0.0005	0.0238029	yes
XLOC_048738	XLOC_048738	LOC_Os07g44590	peroxidase precursor, putative, expressed	INF	Up Regulated	Chr7:26615488-26616879	HCR1	H48	OK	0	0.594031	#NAME?	0.0011	0.0352169	yes
XLOC_051063	XLOC_051063	LOC_Os07g47240	expressed protein	INF	Up Regulated	Chr7:28233255-28236081	HCR1	H48	OK	0	4.64861	#NAME?	5e-05	0.00429853	yes
XLOC_051519	XLOC_051519	LOC_Os08g04370	plastocyanin-like domain containing protein, putative, expressed	INF	Up Regulated	Chr8:2140307-2141141	HCR1	H48	OK	0	2.04549	#NAME?	0.00075	0.0286569	yes
XLOC_053702	XLOC_053702	LOC_Os08g04740	expressed protein	INF	Up Regulated	Chr8:2365409-2366051	HCR1	H48	OK	0	16.58	#NAME?	5e-05	0.00429853	yes
XLOC_051582	XLOC_051582	LOC_Os08g05960	expressed protein	INF	Up Regulated	Chr8:3242787-3243439	HCR1	H48	OK	0	3.69291	#NAME?	0.0001	0.00743766	yes
XLOC_051738	XLOC_051738	LOC_Os08g09020	Cupin domain containing protein, expressed	INF	Up Regulated	Chr8:5248665-5249832	HCR1	H48	OK	0	0.980507	#NAME?	0.00035	0.0191224	yes
XLOC_052071	XLOC_052071	LOC_Os08g15710	DC1 domain, putative, expressed	INF	Up Regulated	Chr8:9538124-9539756	HCR1	H48	OK	0	0.862325	#NAME?	0.001	0.0329538	yes
XLOC_054609	XLOC_054609	LOC_Os08g24200	expressed protein	INF	Up Regulated	Chr8:14607634-14608211	HCR1	H48	OK	0	38.9129	#NAME?	5e-05	0.00429853	yes
XLOC_054683	XLOC_054683	LOC_Os08g25850	expressed protein	INF	Up Regulated	Chr8:15743620-15745775	HCR1	H48	OK	0	2.1605	#NAME?	0.00015	0.0100793	yes
XLOC_054883	XLOC_054883	LOC_Os08g30100	1-aminocyclopropane-1-carboxylate oxidase homolog 1, putative, expressed	INF	Up Regulated	Chr8:18509004-18510244	HCR1	H48	OK	0	11.0057	#NAME?	5e-05	0.00429853	yes
XLOC_052803	XLOC_052803	LOC_Os08g31250	C1-like domain containing protein, expressed	INF	Up Regulated	Chr8:19325135-19326203	HCR1	H48	OK	0	1.42791	#NAME?	0.00095	0.0318081	yes
XLOC_055222	XLOC_055222	LOC_Os08g37210	patatin, putative, expressed	INF	Up Regulated	Chr8:23502942-23505310	HCR1	H48	OK	0	0.628803	#NAME?	0.0003	0.0170603	yes
XLOC_055238	XLOC_055238	LOC_Os08g37470	2-aminoethanethiol dioxygenase, putative, expressed	INF	Up Regulated	Chr8:23730713-23732293	HCR1	H48	OK	0	1.72397	#NAME?	0.00055	0.0253173	yes
XLOC_053381	XLOC_053381	LOC_Os08g42890	pectinesterase inhibitor domain containing protein, expressed	INF	Up Regulated	Chr8:27118802-27119438	HCR1	H48	OK	0	13.9355	#NAME?	5e-05	0.00429853	yes
XLOC_056084	XLOC_056084	LOC_Os09g06770	RING finger protein, putative, expressed	INF	Up Regulated	Chr9:3236284-3237000	HCR1	H48	OK	0	13.9765	#NAME?	5e-05	0.00429853	yes
XLOC_056155	XLOC_056155	LOC_Os09g08300	expressed protein	INF	Up Regulated	Chr9:4290112-4291626	HCR1	H48	OK	0	0.58146	#NAME?	5e-05	0.00429853	yes
XLOC_056408	XLOC_056408	LOC_Os09g13780	retrotransposon protein, putative, unclassified, expressed	INF	Up Regulated	Chr9:8070406-8074806	HCR1	H48	OK	0	0.946286	#NAME?	0.0002	0.0124383	yes
XLOC_056491	XLOC_056491	LOC_Os09g15520	oleosin, putative, expressed	INF	Up Regulated	Chr9:9496338-9497108	HCR1	H48	OK	0	6.77814	#NAME?	0.00025	0.0149744	yes
XLOC_058464	XLOC_058464	LOC_Os09g20400	expressed protein	INF	Up Regulated	Chr9:12263260-12267527	HCR1	H48	OK	0	1.40331	#NAME?	0.0025	0.0599467	no
XLOC_056851	XLOC_056851	LOC_Os09g24290	agenet domain-containing protein, putative, expressed	INF	Up Regulated	Chr9:14434370-14440386	HCR1	H48	OK	0	3.6232	#NAME?	5e-05	0.00429853	yes
XLOC_062461	XLOC_062461	LOC_Os09g27480	expressed protein	INF	Up Regulated	Chr9:16696170-16697423	HCR1	H48	OK	0	0.711403	#NAME?	5e-05	0.00429853	yes
XLOC_057067	XLOC_057067	LOC_Os09g28400	alpha-amylase precursor, putative, expressed	INF	Up Regulated	Chr9:17288992-17291295	HCR1	H48	OK	0	0.646825	#NAME?	0.00055	0.0253173	yes
XLOC_060826	XLOC_060826	LOC_Os09g30240	phosphofructokinase, putative, expressed	INF	Up Regulated	Chr9:18411577-18413165	HCR1	H48	OK	0	2.35757	#NAME?	0.0001	0.00743766	yes
XLOC_063302	XLOC_063302	LOC_Os09g31400	ethylene-insensitive 3, putative, expressed	INF	Up Regulated	Chr9:18749300-18921810	HCR1	H48	OK	0	0.950773	#NAME?	0.00625	0.104572	no
XLOC_061057	XLOC_061057	LOC_Os09g36960	expressed protein	INF	Up Regulated	Chr9:21320658-21321063	HCR1	H48	OK	0	12.9229	#NAME?	5e-05	0.00429853	yes
XLOC_061099	XLOC_061099	LOC_Os09g37880	serine/threonine-protein kinase receptor precursor, putative, expressed	INF	Up Regulated	Chr9:21841355-21845242	HCR1	H48	OK	0	1.41561	#NAME?	5e-05	0.00429853	yes
XLOC_059236	XLOC_059236	LOC_Os09g38350	AMP-binding domain containing protein, expressed	INF	Up Regulated	Chr9:22082636-22084897	HCR1	H48	OK	0	4.89469	#NAME?	5e-05	0.00429853	yes
XLOC_057530	XLOC_057530	LOC_Os09g39850	AP2 domain containing protein, expressed	INF	Up Regulated	Chr9:22847285-22847936	HCR1	H48	OK	0	16.0827	#NAME?	5e-05	0.00429853	yes
XLOC_007154	XLOC_007154	LOC_Os10g04890	expressed protein	INF	Up Regulated	Chr10:2374614-2378634	HCR1	H48	OK	0	2.45714	#NAME?	5e-05	0.00429853	yes
XLOC_008929	XLOC_008929	LOC_Os10g04980	OsFBX365 - F-box domain containing protein, expressed	INF	Up Regulated	Chr10:2422054-2426567	HCR1	H48	OK	0	2.77164	#NAME?	5e-05	0.00429853	yes
XLOC_008946	XLOC_008946	LOC_Os10g05500	OsFBX370 - F-box domain containing protein, expressed	INF	Up Regulated	Chr10:2715949-2718897	HCR1	H48	OK	0	1.28409	#NAME?	5e-05	0.00429853	yes
XLOC_009473	XLOC_009473	LOC_Os10g19050	expressed protein	INF	Up Regulated	Chr10:9700067-9702318	HCR1	H48	OK	0	1.04873	#NAME?	0.0007	0.0282221	yes
XLOC_009543	XLOC_009543	LOC_Os10g20610	laccase-15 precursor, putative, expressed	INF	Up Regulated	Chr10:10390878-10396620	HCR1	H48	OK	0	13.0377	#NAME?	5e-05	0.00429853	yes
XLOC_009589	XLOC_009589	LOC_Os10g21346	chloroplast 30S ribosomal protein S3, putative, expressed	INF	Up Regulated	Chr10:10886436-10887209	HCR1	H48	OK	0	3.98842	#NAME?	5e-05	0.00429853	yes
XLOC_009976	XLOC_009976	LOC_Os10g30390	cytochrome P450, putative, expressed	INF	Up Regulated	Chr10:15796148-15799942	HCR1	H48	OK	0	15.523	#NAME?	5e-05	0.00429853	yes
XLOC_010109	XLOC_010109	LOC_Os10g33360	expressed protein	INF	Up Regulated	Chr10:17547960-17548260	HCR1	H48	OK	0	6.20821	#NAME?	0.0019	0.050937	no
XLOC_008472	XLOC_008472	LOC_Os10g37540	OsFBDUF48 - F-box and DUF domain containing protein, expressed	INF	Up Regulated	Chr10:20098366-20100038	HCR1	H48	OK	0	1.25856	#NAME?	0.0001	0.00743766	yes
XLOC_010416	XLOC_010416	LOC_Os10g40510	LTPL144 - Protease inhibitor/seed storage/LTP family protein precursor, expressed	INF	Up Regulated	Chr10:21690273-21691088	HCR1	H48	OK	0	0.907681	#NAME?	0.0019	0.050937	no
XLOC_008673	XLOC_008673	LOC_Os10g41670	expressed protein	INF	Up Regulated	Chr10:22442990-22443845	HCR1	H48	OK	0	25.8526	#NAME?	5e-05	0.00429853	yes
XLOC_012886	XLOC_012886	LOC_Os11g01630	retrotransposon protein, putative, Ty3-gypsy subclass, expressed	INF	Up Regulated	Chr11:362996-366409	HCR1	H48	OK	0	0.547559	#NAME?	0.0001	0.00743766	yes
XLOC_010866	XLOC_010866	LOC_Os11g03870	LTPL31 - Protease inhibitor/seed storage/LTP family protein precursor, expressed	INF	Up Regulated	Chr11:1543390-1543883	HCR1	H48	OK	0	6.23166	#NAME?	0.00015	0.0100793	yes
XLOC_011228	XLOC_011228	LOC_Os11g11530	ZmEBE-1 protein, putative, expressed	INF	Up Regulated	Chr11:6410836-6412449	HCR1	H48	OK	0	1.63407	#NAME?	0.0001	0.00743766	yes
XLOC_011233	XLOC_011233	LOC_Os11g11620	ZmEBE-1 protein, putative, expressed	INF	Up Regulated	Chr11:6462222-6465280	HCR1	H48	OK	0	1.74336	#NAME?	0.0001	0.00743766	yes
XLOC_011365	XLOC_011365	LOC_Os11g14880	LTPL32 - Protease inhibitor/seed storage/LTP family protein precursor, expressed	INF	Up Regulated	Chr11:8373819-8374488	HCR1	H48	OK	0	33.5124	#NAME?	5e-05	0.00429853	yes
XLOC_014092	XLOC_014092	LOC_Os11g28530	terpene synthase, putative, expressed	INF	Up Regulated	Chr11:16435031-16449276	HCR1	H48	OK	0	2.7074	#NAME?	5e-05	0.00429853	yes
XLOC_012058	XLOC_012058	LOC_Os11g31330	no apical meristem protein, putative, expressed	INF	Up Regulated	Chr11:18288356-18290726	HCR1	H48	OK	0	39.8606	#NAME?	5e-05	0.00429853	yes
XLOC_014277	XLOC_014277	LOC_Os11g32290	3-5 exonuclease eri-1, putative, expressed	INF	Up Regulated	Chr11:19082899-19083859	HCR1	H48	OK	0	1.78797	#NAME?	0.001	0.0329538	yes
XLOC_014363	XLOC_014363	LOC_Os11g34440	phospholipase A2, putative, expressed	INF	Up Regulated	Chr11:20174650-20176341	HCR1	H48	OK	0	1.78359	#NAME?	0.0001	0.00743766	yes
XLOC_012697	XLOC_012697	LOC_Os11g44820	expressed protein	INF	Up Regulated	Chr11:27122936-27123776	HCR1	H48	OK	0	0.489444	#NAME?	0.00625	0.104572	no
XLOC_014863	XLOC_014863	LOC_Os11g45360	DEFL15 - Defensin and Defensin-like DEFL family, expressed	INF	Up Regulated	Chr11:27437609-27438082	HCR1	H48	OK	0	10.6114	#NAME?	0.00075	0.0286569	yes
XLOC_012822	XLOC_012822	LOC_Os11g47550	glycosyl hydrolase, putative, expressed	INF	Up Regulated	Chr11:28735981-28737159	HCR1	H48	OK	0	1.42516	#NAME?	0.0003	0.0170603	yes
XLOC_014946	XLOC_014946	LOC_Os11g47610	glycosyl hydrolase, putative, expressed	INF	Up Regulated	Chr11:28760410-28761603	HCR1	H48	OK	0	1.45688	#NAME?	0.00075	0.0286569	yes
XLOC_015567	XLOC_015567	LOC_Os12g08900	expressed protein	INF	Up Regulated	Chr12:4642209-4647010	HCR1	H48	OK	0	2.51828	#NAME?	5e-05	0.00429853	yes
XLOC_017747	XLOC_017747	LOC_Os12g11550	hypothetical protein	INF	Up Regulated	Chr12:6259613-6259823	HCR1	H48	OK	0	150.844	#NAME?	5e-05	0.00429853	yes
XLOC_015725	XLOC_015725	LOC_Os12g12230	DEFL43 - Defensin and Defensin-like DEFL family, expressed	INF	Up Regulated	Chr12:6715418-6717177	HCR1	H48	OK	0	15.0916	#NAME?	5e-05	0.00429853	yes
XLOC_017843	XLOC_017843	LOC_Os12g13800	O-methyltransferase, putative, expressed	INF	Up Regulated	Chr12:7802116-7807354	HCR1	H48	OK	0	38.7299	#NAME?	5e-05	0.00429853	yes
XLOC_017843	XLOC_017843	LOC_Os12g13810	caffeic acid 3-O-methyltransferase, putative, expressed	INF	Up Regulated	Chr12:7802116-7807354	HCR1	H48	OK	0	38.7299	#NAME?	5e-05	0.00429853	yes
XLOC_015818	XLOC_015818	LOC_Os12g13960	LTPL33 - Protease inhibitor/seed storage/LTP family protein precursor, expressed	INF	Up Regulated	Chr12:7935902-7936286	HCR1	H48	OK	0	29.7276	#NAME?	5e-05	0.00429853	yes
XLOC_017943	XLOC_017943	LOC_Os12g16010	sex determination protein tasselseed-2, putative, expressed	INF	Up Regulated	Chr12:9124111-9125447	HCR1	H48	OK	0	0.535683	#NAME?	0.00405	0.0800416	no
XLOC_015964	XLOC_015964	LOC_Os12g16880	PROLM27 - Prolamin precursor, expressed	INF	Up Regulated	Chr12:9686914-9687610	HCR1	H48	OK	0	6.58944	#NAME?	5e-05	0.00429853	yes
XLOC_018223	XLOC_018223	LOC_Os12g22680	histone H3, putative, expressed	INF	Up Regulated	Chr12:12807802-12808519	HCR1	H48	OK	0	3.79447	#NAME?	5e-05	0.00429853	yes
XLOC_016382	XLOC_016382	LOC_Os12g26960	THION34 - Plant thionin family protein precursor, expressed	INF	Up Regulated	Chr12:15788560-15789163	HCR1	H48	OK	0	2.0878	#NAME?	0.00035	0.0191224	yes
XLOC_016431	XLOC_016431	LOC_Os12g27940	expressed protein	INF	Up Regulated	Chr12:16469118-16469933	HCR1	H48	OK	0	11.6824	#NAME?	5e-05	0.00429853	yes
XLOC_018708	XLOC_018708	LOC_Os12g32850	cytochrome P450, putative, expressed	INF	Up Regulated	Chr12:19848806-19851543	HCR1	H48	OK	0	0.64597	#NAME?	5e-05	0.00429853	yes
XLOC_018796	XLOC_018796	LOC_Os12g34550	ribosomal protein S15 containing protein, expressed	INF	Up Regulated	Chr12:20928622-20931165	HCR1	H48	OK	0	32.5726	#NAME?	5e-05	0.00429853	yes
XLOC_018958	XLOC_018958	LOC_Os12g38010	metallothionein, putative, expressed	INF	Up Regulated	Chr12:23352190-23353189	HCR1	H48	OK	0	1.24402	#NAME?	0.001	0.0329538	yes
XLOC_019140	XLOC_019140	LOC_Os12g41970	lipase class 3 family protein, putative, expressed	INF	Up Regulated	Chr12:26026406-26027537	HCR1	H48	OK	0	0.8386	#NAME?	0.00085	0.0291957	yes
XLOC_017217	XLOC_017217	LOC_Os12g44220	ATPase 2, putative, expressed	INF	Up Regulated	Chr12:27426309-27427745	HCR1	H48	OK	0	0.865983	#NAME?	0.00065	0.0282221	yes
XLOC_003513	XLOC_003513	LOC_Os01g03640	multicopper oxidase domain containing protein, expressed	-INF	Down Regulated	Chr1:1497239-1500609	HCR1	H48	OK	3.59562	0	#NAME?	5e-05	0.00429853	yes
XLOC_000128	XLOC_000128	LOC_Os01g03670	dihydroflavonol-4-reductase, putative, expressed	-INF	Down Regulated	Chr1:1513135-1514467	HCR1	H48	OK	0.959319	0	#NAME?	0.0007	0.0282221	yes
XLOC_000137	XLOC_000137	LOC_Os01g03840	ZOS1-02 - C2H2 zinc finger protein, expressed	-INF	Down Regulated	Chr1:1625158-1626771	HCR1	H48	OK	0.469892	0	#NAME?	0.00585	0.099416	no
XLOC_003617	XLOC_003617	LOC_Os01g06040	expressed protein	-INF	Down Regulated	Chr1:2887059-2888434	HCR1	H48	OK	1.64925	0	#NAME?	0.0007	0.0282221	yes
XLOC_000263	XLOC_000263	LOC_Os01g06400	expressed protein	-INF	Down Regulated	Chr1:3031478-3033009	HCR1	H48	OK	0.981965	0	#NAME?	0.00075	0.0286569	yes
XLOC_003642	XLOC_003642	LOC_Os01g06530	retrotransposon protein, putative, unclassified, expressed	-INF	Down Regulated	Chr1:3078706-3082336	HCR1	H48	OK	1.07532	0	#NAME?	0.0024	0.0580248	no
XLOC_003843	XLOC_003843	LOC_Os01g10420	expressed protein	-INF	Down Regulated	Chr1:5490622-5491360	HCR1	H48	OK	0.465294	0	#NAME?	0.0074	0.116042	no
XLOC_003876	XLOC_003876	LOC_Os01g11010	peptide-N4-asparagine amidase A, putative, expressed	-INF	Down Regulated	Chr1:5875785-5877849	HCR1	H48	OK	1.18362	0	#NAME?	0.0005	0.0238029	yes
XLOC_003900	XLOC_003900	LOC_Os01g11490	zinc finger, C3HC4 type domain containing protein, expressed	-INF	Down Regulated	Chr1:6185621-6186317	HCR1	H48	OK	3.12826	0	#NAME?	0.00085	0.0291957	yes
XLOC_004098	XLOC_004098	LOC_Os01g15680	transferase, putative, expressed	-INF	Down Regulated	Chr1:8821135-8822609	HCR1	H48	OK	3.57772	0	#NAME?	0.0001	0.00743766	yes
XLOC_004126	XLOC_004126	LOC_Os01g16320	plant-specific domain TIGR01570 family protein, expressed	-INF	Down Regulated	Chr1:9254033-9256622	HCR1	H48	OK	5.33197	0	#NAME?	5e-05	0.00429853	yes
XLOC_004142	XLOC_004142	LOC_Os01g16610	plastocyanin-like domain containing protein, putative, expressed	-INF	Down Regulated	Chr1:9429954-9430747	HCR1	H48	OK	5.67998	0	#NAME?	5e-05	0.00429853	yes
XLOC_004153	XLOC_004153	LOC_Os01g16840	microneme protein Sm70, putative, expressed	-INF	Down Regulated	Chr1:9603146-9604187	HCR1	H48	OK	2.10566	0	#NAME?	0.00085	0.0291957	yes
XLOC_004397	XLOC_004397	LOC_Os01g22910	retrotransposon protein, putative, unclassified, expressed	-INF	Down Regulated	Chr1:12875497-12882540	HCR1	H48	OK	0.456597	0	#NAME?	0.0023	0.0561646	no
XLOC_004430	XLOC_004430	LOC_Os01g23800	expressed protein	-INF	Down Regulated	Chr1:13389520-13392417	HCR1	H48	OK	6.95287	0	#NAME?	0.00065	0.0282221	yes
XLOC_001141	XLOC_001141	LOC_Os01g26290	expressed protein	-INF	Down Regulated	Chr1:14901173-14903208	HCR1	H48	OK	1.44373	0	#NAME?	0.0029	0.0672754	no
XLOC_001171	XLOC_001171	LOC_Os01g27470	ubiquitin family domain containing protein, expressed	-INF	Down Regulated	Chr1:15336529-15337588	HCR1	H48	OK	1.59805	0	#NAME?	0.00055	0.0253173	yes
XLOC_001222	XLOC_001222	LOC_Os01g28520	OsFBX8 - F-box domain containing protein, expressed	-INF	Down Regulated	Chr1:15968346-15969552	HCR1	H48	OK	0.577785	0	#NAME?	0.0038	0.0771319	no
XLOC_001292	XLOC_001292	LOC_Os01g30970	PMR5, putative, expressed	-INF	Down Regulated	Chr1:16928617-16929720	HCR1	H48	OK	15.6861	0	#NAME?	5e-05	0.00429853	yes
XLOC_001386	XLOC_001386	LOC_Os01g32920	ZOS1-08 - C2H2 zinc finger protein, expressed	-INF	Down Regulated	Chr1:18073578-18074498	HCR1	H48	OK	0.567156	0	#NAME?	0.00585	0.099416	no
XLOC_001596	XLOC_001596	LOC_Os01g37460	zinc finger family protein, putative, expressed	-INF	Down Regulated	Chr1:20935788-20937446	HCR1	H48	OK	1.48243	0	#NAME?	0.00045	0.0222941	yes
XLOC_001643	XLOC_001643	LOC_Os01g38520	expressed protein	-INF	Down Regulated	Chr1:21633971-21635454	HCR1	H48	OK	1.11654	0	#NAME?	0.00085	0.0291957	yes
XLOC_005046	XLOC_005046	LOC_Os01g38960	expressed protein	-INF	Down Regulated	Chr1:21886898-21887840	HCR1	H48	OK	1.24306	0	#NAME?	0.0013	0.0387745	yes
XLOC_005139	XLOC_005139	LOC_Os01g41170	THION27 - Plant thionin family protein precursor, expressed	-INF	Down Regulated	Chr1:23311170-23312582	HCR1	H48	OK	202.638	0	#NAME?	5e-05	0.00429853	yes
XLOC_005140	XLOC_005140	LOC_Os01g41180	THION19 - Plant thionin family protein precursor, putative, expressed	-INF	Down Regulated	Chr1:23313210-23313928	HCR1	H48	OK	1.02201	0	#NAME?	0.00385	0.0771319	no
XLOC_001789	XLOC_001789	LOC_Os01g41300	expressed protein	-INF	Down Regulated	Chr1:23367463-23368423	HCR1	H48	OK	4.73574	0	#NAME?	0.0023	0.0561646	no
XLOC_005345	XLOC_005345	LOC_Os01g46280	expressed protein	-INF	Down Regulated	Chr1:26315860-26317359	HCR1	H48	OK	1.74869	0	#NAME?	0.0029	0.0672754	no
XLOC_002045	XLOC_002045	LOC_Os01g46730	expressed protein	-INF	Down Regulated	Chr1:26619134-26620234	HCR1	H48	OK	2.85671	0	#NAME?	0.00035	0.0191224	yes
XLOC_005367	XLOC_005367	LOC_Os01g46790	expressed protein	-INF	Down Regulated	Chr1:26679472-26680317	HCR1	H48	OK	2.15896	0	#NAME?	0.00195	0.050937	no
XLOC_005370	XLOC_005370	LOC_Os01g46820	expressed protein	-INF	Down Regulated	Chr1:26709124-26710724	HCR1	H48	OK	1.29954	0	#NAME?	0.00385	0.0771319	no
XLOC_002135	XLOC_002135	LOC_Os01g48570	expressed protein	-INF	Down Regulated	Chr1:27852464-27855997	HCR1	H48	OK	0.62115	0	#NAME?	0.0008	0.0291957	yes
XLOC_002241	XLOC_002241	LOC_Os01g50680	OsSub2 - Putative Subtilisin homologue, expressed	-INF	Down Regulated	Chr1:29104883-29109135	HCR1	H48	OK	1.21922	0	#NAME?	5e-05	0.00429853	yes
XLOC_005707	XLOC_005707	LOC_Os01g54630	leucine rich repeat family protein, putative, expressed	-INF	Down Regulated	Chr1:31431622-31433202	HCR1	H48	OK	0.694636	0	#NAME?	0.00145	0.0409502	yes
XLOC_002496	XLOC_002496	LOC_Os01g55850	expressed protein	-INF	Down Regulated	Chr1:32165439-32165796	HCR1	H48	OK	3.23004	0	#NAME?	0.0038	0.0771319	no
XLOC_002630	XLOC_002630	LOC_Os01g58480	expressed protein	-INF	Down Regulated	Chr1:33809688-33811015	HCR1	H48	OK	1.80655	0	#NAME?	0.00145	0.0409502	yes
XLOC_002655	XLOC_002655	LOC_Os01g58960	cytochrome P450, putative, expressed	-INF	Down Regulated	Chr1:34084756-34086514	HCR1	H48	OK	0.531799	0	#NAME?	0.0007	0.0282221	yes
XLOC_006090	XLOC_006090	LOC_Os01g62750	expressed protein	-INF	Down Regulated	Chr1:36325682-36336561	HCR1	H48	OK	0.621944	0	#NAME?	0.0003	0.0170603	yes
XLOC_006180	XLOC_006180	LOC_Os01g64590	dof zinc finger domain containing protein, putative, expressed	-INF	Down Regulated	Chr1:37472375-37473368	HCR1	H48	OK	1.38135	0	#NAME?	0.0007	0.0282221	yes
XLOC_006207	XLOC_006207	LOC_Os01g65300	retrotransposon protein, putative, unclassified, expressed	-INF	Down Regulated	Chr1:37885962-37886577	HCR1	H48	OK	0.520557	0	#NAME?	0.0074	0.116042	no
XLOC_003036	XLOC_003036	LOC_Os01g66660	expressed protein	-INF	Down Regulated	Chr1:38718490-38719379	HCR1	H48	OK	0.792839	0	#NAME?	0.0074	0.116042	no
XLOC_006279	XLOC_006279	LOC_Os01g66670	expressed protein	-INF	Down Regulated	Chr1:38723346-38724165	HCR1	H48	OK	1.12385	0	#NAME?	0.00195	0.050937	no
XLOC_003098	XLOC_003098	LOC_Os01g68130	expressed protein	-INF	Down Regulated	Chr1:39608022-39612003	HCR1	H48	OK	0.506041	0	#NAME?	0.00085	0.0291957	yes
XLOC_003280	XLOC_003280	LOC_Os01g72660	expressed protein	-INF	Down Regulated	Chr1:42160802-42161279	HCR1	H48	OK	0.878015	0	#NAME?	0.00585	0.099416	no
XLOC_019505	XLOC_019505	LOC_Os02g02150	ATP-dependent helicase HRQ1, putative, expressed	-INF	Down Regulated	Chr2:646111-649306	HCR1	H48	OK	0.512968	0	#NAME?	5e-05	0.00429853	yes
XLOC_022243	XLOC_022243	LOC_Os02g02380	suppressor of phythchrome A, putative, expressed	-INF	Down Regulated	Chr2:795065-796280	HCR1	H48	OK	0.532813	0	#NAME?	0.00585	0.099416	no
XLOC_022263	XLOC_022263	LOC_Os02g02820	helix-loop-helix DNA-binding domain containing protein, expressed	-INF	Down Regulated	Chr2:1073550-1076776	HCR1	H48	OK	15.1597	0	#NAME?	5e-05	0.00429853	yes
XLOC_019566	XLOC_019566	LOC_Os02g03390	expressed protein	-INF	Down Regulated	Chr2:1375684-1377691	HCR1	H48	OK	0.472762	0	#NAME?	0.0074	0.116042	no
XLOC_019573	XLOC_019573	LOC_Os02g03500	expressed protein	-INF	Down Regulated	Chr2:1423841-1424090	HCR1	H48	OK	177.606	0	#NAME?	5e-05	0.00429853	yes
XLOC_022386	XLOC_022386	LOC_Os02g05650	expressed protein	-INF	Down Regulated	Chr2:2760576-2762882	HCR1	H48	OK	2.63321	0	#NAME?	0.00045	0.0222941	yes
XLOC_019739	XLOC_019739	LOC_Os02g06510	myosin heavy chain, putative, expressed	-INF	Down Regulated	Chr2:3251082-3252406	HCR1	H48	OK	2.58477	0	#NAME?	5e-05	0.00429853	yes
XLOC_019750	XLOC_019750	LOC_Os02g06670	retrotransposon protein, putative, unclassified, expressed	-INF	Down Regulated	Chr2:3353563-3354822	HCR1	H48	OK	0.981535	0	#NAME?	0.0023	0.0561646	no
XLOC_019843	XLOC_019843	LOC_Os02g08240	STE_PAK_Ste20_STLK.1 - STE kinases include homologs to sterile 7, sterile 11 and sterile 20 from yeast, expressed	-INF	Down Regulated	Chr2:4376540-4382260	HCR1	H48	OK	2.61553	0	#NAME?	5e-05	0.00429853	yes
XLOC_019843	XLOC_019843	LOC_Os02g08250	expressed protein	-INF	Down Regulated	Chr2:4376540-4382260	HCR1	H48	OK	2.61553	0	#NAME?	5e-05	0.00429853	yes
XLOC_019911	XLOC_019911	LOC_Os02g10250	expressed protein	-INF	Down Regulated	Chr2:5369276-5369552	HCR1	H48	OK	4.22114	0	#NAME?	0.00585	0.099416	no
XLOC_022739	XLOC_022739	LOC_Os02g13670	helix-loop-helix DNA-binding domain containing protein, expressed	-INF	Down Regulated	Chr2:7332559-7334171	HCR1	H48	OK	0.998593	0	#NAME?	0.00035	0.0191224	yes
XLOC_022742	XLOC_022742	LOC_Os02g13760	expressed protein	-INF	Down Regulated	Chr2:7428174-7429324	HCR1	H48	OK	1.27682	0	#NAME?	0.0006	0.0268165	yes
XLOC_023057	XLOC_023057	LOC_Os02g20560	fasciclin domain containing protein, expressed	-INF	Down Regulated	Chr2:12127911-12129262	HCR1	H48	OK	11.6274	0	#NAME?	5e-05	0.00429853	yes
XLOC_020572	XLOC_020572	LOC_Os02g25130	retrotransposon protein, putative, Ty1-copia subclass, expressed	-INF	Down Regulated	Chr2:14594791-14598641	HCR1	H48	OK	3.07926	0	#NAME?	5e-05	0.00429853	yes
XLOC_020622	XLOC_020622	LOC_Os02g26080	anther-specific proline-rich protein APG precursor, putative, expressed	-INF	Down Regulated	Chr2:15310585-15312560	HCR1	H48	OK	1.05172	0	#NAME?	0.0074	0.116042	no
XLOC_020853	XLOC_020853	LOC_Os02g30550	expressed protein	-INF	Down Regulated	Chr2:18181860-18182073	HCR1	H48	OK	56.548	0	#NAME?	0.0007	0.0282221	yes
XLOC_020890	XLOC_020890	LOC_Os02g31850	transposon protein, putative, unclassified, expressed	-INF	Down Regulated	Chr2:18813073-18816005	HCR1	H48	OK	0.480913	0	#NAME?	5e-05	0.00429853	yes
XLOC_020900	XLOC_020900	LOC_Os02g32080	LEML2 - Anther-specific LEM1 family protein precursor, expressed	-INF	Down Regulated	Chr2:18956518-18957353	HCR1	H48	OK	129.524	0	#NAME?	5e-05	0.00429853	yes
XLOC_023670	XLOC_023670	LOC_Os02g34260	AP2 domain containing protein, expressed	-INF	Down Regulated	Chr2:20491112-20491868	HCR1	H48	OK	2.27903	0	#NAME?	0.0007	0.0282221	yes
XLOC_023783	XLOC_023783	LOC_Os02g36580	expressed protein	-INF	Down Regulated	Chr2:22090345-22091383	HCR1	H48	OK	12.7012	0	#NAME?	0.0001	0.00743766	yes
XLOC_021225	XLOC_021225	LOC_Os02g39155	expressed protein	-INF	Down Regulated	Chr2:23652725-23653253	HCR1	H48	OK	0.642494	0	#NAME?	0.0074	0.116042	no
XLOC_024161	XLOC_024161	LOC_Os02g44136	retrotransposon protein, putative, Ty1-copia subclass, expressed	-INF	Down Regulated	Chr2:26709496-26717517	HCR1	H48	OK	1.99009	0	#NAME?	0.0002	0.0124383	yes
XLOC_021469	XLOC_021469	LOC_Os02g44700	zinc finger, C3HC4 type domain containing protein, expressed	-INF	Down Regulated	Chr2:27082946-27083411	HCR1	H48	OK	1.21724	0	#NAME?	0.00385	0.0771319	no
XLOC_024255	XLOC_024255	LOC_Os02g45890	sulfotransferase domain containing protein, expressed	-INF	Down Regulated	Chr2:27967466-27968844	HCR1	H48	OK	2.30917	0	#NAME?	5e-05	0.00429853	yes
XLOC_021563	XLOC_021563	LOC_Os02g46760	STE_MEK_ste7_MAP2K.4 - STE kinases include homologs to sterile 7, sterile 11 and sterile 20 from yeast, expressed	-INF	Down Regulated	Chr2:28552738-28553761	HCR1	H48	OK	6.89593	0	#NAME?	5e-05	0.00429853	yes
XLOC_024364	XLOC_024364	LOC_Os02g48030	expressed protein	-INF	Down Regulated	Chr2:29397895-29401429	HCR1	H48	OK	2.01746	0	#NAME?	0.00065	0.0282221	yes
XLOC_021867	XLOC_021867	LOC_Os02g52700	alpha-amylase precursor, putative, expressed	-INF	Down Regulated	Chr2:32243145-32245056	HCR1	H48	OK	11.8905	0	#NAME?	5e-05	0.00429853	yes
XLOC_024688	XLOC_024688	LOC_Os02g54350	hypothetical protein	-INF	Down Regulated	Chr2:33319787-33320458	HCR1	H48	OK	1.01204	0	#NAME?	0.0074	0.116042	no
XLOC_021959	XLOC_021959	LOC_Os02g54790	expressed protein	-INF	Down Regulated	Chr2:33552170-33556522	HCR1	H48	OK	0.695708	0	#NAME?	5e-05	0.00429853	yes
XLOC_024741	XLOC_024741	LOC_Os02g55510	CXXXC2 - Cysteine-rich protein with paired CXXXC motifs precursor, putative, expressed	-INF	Down Regulated	Chr2:33987023-33987714	HCR1	H48	OK	28.2897	0	#NAME?	5e-05	0.00429853	yes
XLOC_022006	XLOC_022006	LOC_Os02g55649	CXXXC8 - Cysteine-rich protein with paired CXXXC motifs precursor, putative, expressed	-INF	Down Regulated	Chr2:34081774-34082484	HCR1	H48	OK	29.1053	0	#NAME?	5e-05	0.00429853	yes
XLOC_022011	XLOC_022011	LOC_Os02g55820	expressed protein	-INF	Down Regulated	Chr2:34172109-34176453	HCR1	H48	OK	8.6669	0	#NAME?	5e-05	0.00429853	yes
XLOC_024784	XLOC_024784	LOC_Os02g56490	expressed protein	-INF	Down Regulated	Chr2:34584200-34585223	HCR1	H48	OK	2.06444	0	#NAME?	5e-05	0.00429853	yes
XLOC_024875	XLOC_024875	LOC_Os02g58380	expressed protein	-INF	Down Regulated	Chr2:35702656-35703491	HCR1	H48	OK	0.739126	0	#NAME?	0.00585	0.099416	no
XLOC_025189	XLOC_025189	LOC_Os03g01290	peptide transporter PTR2, putative, expressed	-INF	Down Regulated	Chr3:202526-205750	HCR1	H48	OK	0.812937	0	#NAME?	0.00045	0.0222941	yes
XLOC_025206	XLOC_025206	LOC_Os03g01630	expansin precursor, putative, expressed	-INF	Down Regulated	Chr3:391570-392374	HCR1	H48	OK	1.45334	0	#NAME?	0.0007	0.0282221	yes
XLOC_025374	XLOC_025374	LOC_Os03g04840	expressed protein	-INF	Down Regulated	Chr3:2300845-2306889	HCR1	H48	OK	1.00488	0	#NAME?	5e-05	0.00429853	yes
XLOC_028224	XLOC_028224	LOC_Os03g05510	DUF260 domain containing protein, putative, expressed	-INF	Down Regulated	Chr3:2726695-2727559	HCR1	H48	OK	0.720797	0	#NAME?	0.00585	0.099416	no
XLOC_025441	XLOC_025441	LOC_Os03g06000	expansin precursor, putative, expressed	-INF	Down Regulated	Chr3:2998854-3000007	HCR1	H48	OK	6.12436	0	#NAME?	5e-05	0.00429853	yes
XLOC_025604	XLOC_025604	LOC_Os03g10010	expressed protein	-INF	Down Regulated	Chr3:5014346-5014667	HCR1	H48	OK	2.36865	0	#NAME?	0.0074	0.116042	no
XLOC_025622	XLOC_025622	LOC_Os03g10334	expressed protein	-INF	Down Regulated	Chr3:5271245-5272333	HCR1	H48	OK	18.9781	0	#NAME?	5e-05	0.00429853	yes
XLOC_025677	XLOC_025677	LOC_Os03g11430	expressed protein	-INF	Down Regulated	Chr3:5891274-5893288	HCR1	H48	OK	0.640775	0	#NAME?	0.0013	0.0387745	yes
XLOC_028554	XLOC_028554	LOC_Os03g13070	thaumatin family domain containing protein, expressed	-INF	Down Regulated	Chr3:7066550-7067431	HCR1	H48	OK	1.00652	0	#NAME?	0.0023	0.0561646	no
XLOC_025942	XLOC_025942	LOC_Os03g16770	hypothetical protein	-INF	Down Regulated	Chr3:9293803-9296671	HCR1	H48	OK	0.552635	0	#NAME?	0.00115	0.0363793	yes
XLOC_025967	XLOC_025967	LOC_Os03g17330	expressed protein	-INF	Down Regulated	Chr3:9645539-9646541	HCR1	H48	OK	7.06079	0	#NAME?	5e-05	0.00429853	yes
XLOC_028838	XLOC_028838	LOC_Os03g19120	MYB family transcription factor, putative, expressed	-INF	Down Regulated	Chr3:10706982-10713282	HCR1	H48	OK	0.778271	0	#NAME?	0.0006	0.0268165	yes
XLOC_026209	XLOC_026209	LOC_Os03g22080	RING-H2 finger protein, putative, expressed	-INF	Down Regulated	Chr3:12652783-12653582	HCR1	H48	OK	0.882564	0	#NAME?	0.00385	0.0771319	no
XLOC_026235	XLOC_026235	LOC_Os03g22650	expressed protein	-INF	Down Regulated	Chr3:13078646-13079225	HCR1	H48	OK	1.86308	0	#NAME?	0.00145	0.0409502	yes
XLOC_026324	XLOC_026324	LOC_Os03g25030	GDSL-like lipase/acylhydrolase, putative, expressed	-INF	Down Regulated	Chr3:14289591-14293316	HCR1	H48	OK	0.763508	0	#NAME?	0.0007	0.0282221	yes
XLOC_026355	XLOC_026355	LOC_Os03g25530	expressed protein	-INF	Down Regulated	Chr3:14578538-14579246	HCR1	H48	OK	0.52443	0	#NAME?	0.0074	0.116042	no
XLOC_026402	XLOC_026402	LOC_Os03g26530	3-ketoacyl-CoA synthase, putative, expressed	-INF	Down Regulated	Chr3:15149938-15151951	HCR1	H48	OK	0.77463	0	#NAME?	0.00045	0.0222941	yes
XLOC_026407	XLOC_026407	LOC_Os03g26590	expressed protein	-INF	Down Regulated	Chr3:15189112-15195859	HCR1	H48	OK	1.46183	0	#NAME?	0.0007	0.0282221	yes
XLOC_026470	XLOC_026470	LOC_Os03g27910	retrotransposon protein, putative, Ty1-copia subclass, expressed	-INF	Down Regulated	Chr3:16026704-16032147	HCR1	H48	OK	0.897149	0	#NAME?	5e-05	0.00429853	yes
XLOC_029213	XLOC_029213	LOC_Os03g27920	expressed protein	-INF	Down Regulated	Chr3:16033128-16034468	HCR1	H48	OK	0.54652	0	#NAME?	0.0074	0.116042	no
XLOC_026485	XLOC_026485	LOC_Os03g28170	expressed protein	-INF	Down Regulated	Chr3:16214380-16215458	HCR1	H48	OK	9.51457	0	#NAME?	5e-05	0.00429853	yes
XLOC_029225	XLOC_029225	LOC_Os03g28190	dirigent, putative, expressed	-INF	Down Regulated	Chr3:16227656-16228190	HCR1	H48	OK	1.39497	0	#NAME?	0.0038	0.0771319	no
XLOC_026796	XLOC_026796	LOC_Os03g36640	expressed protein	-INF	Down Regulated	Chr3:20321429-20323349	HCR1	H48	OK	0.565655	0	#NAME?	0.0038	0.0771319	no
XLOC_029614	XLOC_029614	LOC_Os03g38390	GDSL-like lipase/acylhydrolase, putative, expressed	-INF	Down Regulated	Chr3:21297924-21313680	HCR1	H48	OK	21.5942	0	#NAME?	5e-05	0.00429853	yes
XLOC_026981	XLOC_026981	LOC_Os03g41480	expressed protein	-INF	Down Regulated	Chr3:23076787-23080251	HCR1	H48	OK	4.61876	0	#NAME?	5e-05	0.00429853	yes
XLOC_027104	XLOC_027104	LOC_Os03g44270	retrotransposon protein, putative, Ty1-copia subclass, expressed	-INF	Down Regulated	Chr3:24883793-24886684	HCR1	H48	OK	0.460662	0	#NAME?	0.00065	0.0282221	yes
XLOC_029947	XLOC_029947	LOC_Os03g45450	WRKY60, expressed	-INF	Down Regulated	Chr3:25651038-25652125	HCR1	H48	OK	0.578364	0	#NAME?	0.0074	0.116042	no
XLOC_029956	XLOC_029956	LOC_Os03g45619	cytochrome P450, putative, expressed	-INF	Down Regulated	Chr3:25746000-25760794	HCR1	H48	OK	4.17245	0	#NAME?	5e-05	0.00429853	yes
XLOC_030013	XLOC_030013	LOC_Os03g46860	helix-loop-helix DNA-binding protein, putative, expressed	-INF	Down Regulated	Chr3:26505143-26509491	HCR1	H48	OK	0.508296	0	#NAME?	0.0007	0.0282221	yes
XLOC_027312	XLOC_027312	LOC_Os03g48904	expressed protein	-INF	Down Regulated	Chr3:27846971-27853473	HCR1	H48	OK	0.639115	0	#NAME?	0.00055	0.0253173	yes
XLOC_030130	XLOC_030130	LOC_Os03g49240	expressed protein	-INF	Down Regulated	Chr3:28043529-28044822	HCR1	H48	OK	3.62765	0	#NAME?	0.0008	0.0291957	yes
XLOC_030150	XLOC_030150	LOC_Os03g49590	expressed protein	-INF	Down Regulated	Chr3:28239395-28240049	HCR1	H48	OK	5.4425	0	#NAME?	5e-05	0.00429853	yes
XLOC_031134	XLOC_031134	LOC_Os04g01330	expressed protein	-INF	Down Regulated	Chr4:250459-251388	HCR1	H48	OK	2.88391	0	#NAME?	0.0008	0.0291957	yes
XLOC_031345	XLOC_031345	LOC_Os04g06510	expressed protein	-INF	Down Regulated	Chr4:3417460-3419747	HCR1	H48	OK	0.485166	0	#NAME?	0.00085	0.0291957	yes
XLOC_034182	XLOC_034182	LOC_Os04g10360	OsSub40 - Putative Subtilisin homologue, expressed	-INF	Down Regulated	Chr4:5596641-5599067	HCR1	H48	OK	12.5256	0	#NAME?	5e-05	0.00429853	yes
XLOC_034188	XLOC_034188	LOC_Os04g10500	expressed protein	-INF	Down Regulated	Chr4:5706027-5707397	HCR1	H48	OK	13.0916	0	#NAME?	5e-05	0.00429853	yes
XLOC_034218	XLOC_034218	LOC_Os04g11200	expressed protein	-INF	Down Regulated	Chr4:6097214-6097691	HCR1	H48	OK	2.47424	0	#NAME?	0.00585	0.099416	no
XLOC_031803	XLOC_031803	LOC_Os04g17669	expressed protein	-INF	Down Regulated	Chr4:9683944-9685135	HCR1	H48	OK	3.28327	0	#NAME?	5e-05	0.00429853	yes
XLOC_031824	XLOC_031824	LOC_Os04g18100	expressed protein	-INF	Down Regulated	Chr4:10002331-INF02649	HCR1	H48	OK	6.90502	0	#NAME?	0.00145	0.0409502	yes
XLOC_034634	XLOC_034634	LOC_Os04g19640	expressed protein	-INF	Down Regulated	Chr4:10944481-10947691	HCR1	H48	OK	1.07755	0	#NAME?	0.0003	0.0170603	yes
XLOC_034892	XLOC_034892	LOC_Os04g25420	expressed protein	-INF	Down Regulated	Chr4:14738464-14738946	HCR1	H48	OK	4.81728	0	#NAME?	0.0038	0.0771319	no
XLOC_035039	XLOC_035039	LOC_Os04g28530	expressed protein	-INF	Down Regulated	Chr4:16895651-16900752	HCR1	H48	OK	3.11668	0	#NAME?	0.0003	0.0170603	yes
XLOC_032327	XLOC_032327	LOC_Os04g28670	expressed protein	-INF	Down Regulated	Chr4:16983021-16990058	HCR1	H48	OK	0.771236	0	#NAME?	5e-05	0.00429853	yes
XLOC_032327	XLOC_032327	LOC_Os04g28680	male sterility protein, putative, expressed	-INF	Down Regulated	Chr4:16983021-16990058	HCR1	H48	OK	0.771236	0	#NAME?	5e-05	0.00429853	yes
XLOC_032381	XLOC_032381	LOC_Os04g29670	expressed protein	-INF	Down Regulated	Chr4:17653765-17654187	HCR1	H48	OK	7.68434	0	#NAME?	0.0013	0.0387745	yes
XLOC_035112	XLOC_035112	LOC_Os04g30300	retrotransposon protein, putative, unclassified, expressed	-INF	Down Regulated	Chr4:18087910-18091534	HCR1	H48	OK	0.590339	0	#NAME?	5e-05	0.00429853	yes
XLOC_032465	XLOC_032465	LOC_Os04g31430	RALFL30 - Rapid ALkalinization Factor RALF family protein precursor, putative, expressed	-INF	Down Regulated	Chr4:18801022-18801528	HCR1	H48	OK	0.794819	0	#NAME?	0.0074	0.116042	no
XLOC_032467	XLOC_032467	LOC_Os04g31484	RALFL20 - Rapid ALkalinization Factor RALF family protein precursor, expressed	-INF	Down Regulated	Chr4:18827085-18827448	HCR1	H48	OK	10.5235	0	#NAME?	0.00055	0.0253173	yes
XLOC_032477	XLOC_032477	LOC_Os04g31640	expressed protein	-INF	Down Regulated	Chr4:18956431-18959140	HCR1	H48	OK	0.8075	0	#NAME?	0.00135	0.0399802	yes
XLOC_035217	XLOC_035217	LOC_Os04g32820	expressed protein	-INF	Down Regulated	Chr4:19819397-19820459	HCR1	H48	OK	1.64384	0	#NAME?	0.00075	0.0286569	yes
XLOC_035218	XLOC_035218	LOC_Os04g32830	expressed protein	-INF	Down Regulated	Chr4:19821426-19823024	HCR1	H48	OK	0.986925	0	#NAME?	0.00035	0.0191224	yes
XLOC_035221	XLOC_035221	LOC_Os04g32860	expressed protein	-INF	Down Regulated	Chr4:19841564-19844276	HCR1	H48	OK	3.4527	0	#NAME?	5e-05	0.00429853	yes
XLOC_035260	XLOC_035260	LOC_Os04g33530	Ser/Thr protein phosphatase family protein, putative, expressed	-INF	Down Regulated	Chr4:20283433-20285410	HCR1	H48	OK	0.581792	0	#NAME?	0.00085	0.0291957	yes
XLOC_032580	XLOC_032580	LOC_Os04g33720	glycosyl hydrolases, putative, expressed	-INF	Down Regulated	Chr4:20412314-20415242	HCR1	H48	OK	17.3632	0	#NAME?	5e-05	0.00429853	yes
XLOC_032594	XLOC_032594	LOC_Os04g33930	LTPL103 - Protease inhibitor/seed storage/LTP family protein precursor, expressed	-INF	Down Regulated	Chr4:20547165-20548477	HCR1	H48	OK	43.6915	0	#NAME?	5e-05	0.00429853	yes
XLOC_032673	XLOC_032673	LOC_Os04g35390	expressed protein	-INF	Down Regulated	Chr4:21525528-21526696	HCR1	H48	OK	4.0553	0	#NAME?	0.0008	0.0291957	yes
XLOC_032690	XLOC_032690	LOC_Os04g35739	retrotransposon protein, putative, Ty1-copia subclass, expressed	-INF	Down Regulated	Chr4:21785487-21786227	HCR1	H48	OK	5.5654	0	#NAME?	5e-05	0.00429853	yes
XLOC_035388	XLOC_035388	LOC_Os04g37450	expressed protein	-INF	Down Regulated	Chr4:22313155-22313951	HCR1	H48	OK	0.954821	0	#NAME?	0.00195	0.050937	no
XLOC_032942	XLOC_032942	LOC_Os04g42150	hypothetical protein	-INF	Down Regulated	Chr4:24958656-24959318	HCR1	H48	OK	1.47375	0	#NAME?	0.00085	0.0291957	yes
XLOC_035623	XLOC_035623	LOC_Os04g42350	heavy metal-associated domain containing protein, expressed	-INF	Down Regulated	Chr4:25059788-25061979	HCR1	H48	OK	8.28107	0	#NAME?	5e-05	0.00429853	yes
XLOC_033020	XLOC_033020	LOC_Os04g44080	expressed protein	-INF	Down Regulated	Chr4:26106481-26107067	HCR1	H48	OK	7.94917	0	#NAME?	0.00585	0.099416	no
XLOC_033039	XLOC_033039	LOC_Os04g44440	TCP family transcription factor, putative, expressed	-INF	Down Regulated	Chr4:26310602-26311673	HCR1	H48	OK	1.40663	0	#NAME?	0.00075	0.0286569	yes
XLOC_033040	XLOC_033040	LOC_Os04g44460	sulfotransferase domain containing protein, expressed	-INF	Down Regulated	Chr4:26320448-26321489	HCR1	H48	OK	0.606158	0	#NAME?	0.0038	0.0771319	no
XLOC_035812	XLOC_035812	LOC_Os04g46110	fibroin heavy chain precursor, putative, expressed	-INF	Down Regulated	Chr4:27326621-27327503	HCR1	H48	OK	0.769453	0	#NAME?	0.00385	0.0771319	no
XLOC_033126	XLOC_033126	LOC_Os04g46384	MYB family transcription factor, putative, expressed	-INF	Down Regulated	Chr4:27503040-27504784	HCR1	H48	OK	1.73728	0	#NAME?	0.0005	0.0238029	yes
XLOC_033130	XLOC_033130	LOC_Os04g46420	expressed protein	-INF	Down Regulated	Chr4:27525809-27526092	HCR1	H48	OK	14.5001	0	#NAME?	0.00385	0.0771319	no
XLOC_035830	XLOC_035830	LOC_Os04g46490	aquaporin protein, putative, expressed	-INF	Down Regulated	Chr4:27575660-27576996	HCR1	H48	OK	9.31557	0	#NAME?	5e-05	0.00429853	yes
XLOC_033144	XLOC_033144	LOC_Os04g46670	ZOS4-09 - C2H2 zinc finger protein, expressed	-INF	Down Regulated	Chr4:27666026-27668282	HCR1	H48	OK	15.2722	0	#NAME?	5e-05	0.00429853	yes
XLOC_035844	XLOC_035844	LOC_Os04g46790	expressed protein	-INF	Down Regulated	Chr4:27736480-27737152	HCR1	H48	OK	1.53193	0	#NAME?	0.0013	0.0387745	yes
XLOC_035861	XLOC_035861	LOC_Os04g47080	anthocyanin regulatory Lc protein, putative, expressed	-INF	Down Regulated	Chr4:27949383-27955640	HCR1	H48	OK	0.60968	0	#NAME?	5e-05	0.00429853	yes
XLOC_033196	XLOC_033196	LOC_Os04g47840	expressed protein	-INF	Down Regulated	Chr4:28393757-28394469	HCR1	H48	OK	0.692375	0	#NAME?	0.0023	0.0561646	no
XLOC_033237	XLOC_033237	LOC_Os04g48720	expressed protein	-INF	Down Regulated	Chr4:29056014-29057318	HCR1	H48	OK	1.05184	0	#NAME?	0.0074	0.116042	no
XLOC_033313	XLOC_033313	LOC_Os04g50820	oligopeptide transporter, putative, expressed	-INF	Down Regulated	Chr4:30062426-30065581	HCR1	H48	OK	3.01256	0	#NAME?	5e-05	0.00429853	yes
XLOC_036056	XLOC_036056	LOC_Os04g51070	helix-loop-helix DNA-binding domain containing protein, expressed	-INF	Down Regulated	Chr4:30235322-30238854	HCR1	H48	OK	2.01638	0	#NAME?	5e-05	0.00429853	yes
XLOC_033367	XLOC_033367	LOC_Os04g51980	transferase family domain containing protein, expressed	-INF	Down Regulated	Chr4:30860606-30863364	HCR1	H48	OK	4.02025	0	#NAME?	5e-05	0.00429853	yes
XLOC_036233	XLOC_036233	LOC_Os04g54550	AT5MAT, putative, expressed	-INF	Down Regulated	Chr4:32445397-32445928	HCR1	H48	OK	0.881483	0	#NAME?	0.0074	0.116042	no
XLOC_033602	XLOC_033602	LOC_Os04g56600	expressed protein	-INF	Down Regulated	Chr4:33754008-33755306	HCR1	H48	OK	0.926005	0	#NAME?	0.0023	0.0561646	no
XLOC_036375	XLOC_036375	LOC_Os04g57270	expressed protein	-INF	Down Regulated	Chr4:34104677-34104884	HCR1	H48	OK	1359.37	0	#NAME?	5e-05	0.00429853	yes
XLOC_033660	XLOC_033660	LOC_Os04g58120	CRP2 - Cysteine-rich family protein precursor, expressed	-INF	Down Regulated	Chr4:34612591-34613613	HCR1	H48	OK	1.42203	0	#NAME?	0.00085	0.0291957	yes
XLOC_033669	XLOC_033669	LOC_Os04g58270	expressed protein	-INF	Down Regulated	Chr4:34690128-34691974	HCR1	H48	OK	0.915063	0	#NAME?	0.00585	0.099416	no
XLOC_039135	XLOC_039135	LOC_Os05g01140	methyltransferase, putative, expressed	-INF	Down Regulated	Chr5:116430-118348	HCR1	H48	OK	2.17555	0	#NAME?	5e-05	0.00429853	yes
XLOC_036853	XLOC_036853	LOC_Os05g01890	expressed protein	-INF	Down Regulated	Chr5:509779-510266	HCR1	H48	OK	1.39148	0	#NAME?	0.0074	0.116042	no
XLOC_036860	XLOC_036860	LOC_Os05g02030	OB-fold nucleic acid binding domain containing protein, putative, expressed	-INF	Down Regulated	Chr5:590265-591787	HCR1	H48	OK	0.765324	0	#NAME?	0.00145	0.0409502	yes
XLOC_036868	XLOC_036868	LOC_Os05g02180	expressed protein	-INF	Down Regulated	Chr5:685418-686671	HCR1	H48	OK	0.705293	0	#NAME?	0.00145	0.0409502	yes
XLOC_036924	XLOC_036924	LOC_Os05g03330	expressed protein	-INF	Down Regulated	Chr5:1357713-1361013	HCR1	H48	OK	1.84128	0	#NAME?	0.0027	0.0635947	no
XLOC_036943	XLOC_036943	LOC_Os05g03600	retrotransposon protein, putative, unclassified, expressed	-INF	Down Regulated	Chr5:1523846-1529707	HCR1	H48	OK	0.492156	0	#NAME?	5e-05	0.00429853	yes
XLOC_037049	XLOC_037049	LOC_Os05g05850	expressed protein	-INF	Down Regulated	Chr5:2932679-2933259	HCR1	H48	OK	0.817574	0	#NAME?	0.0074	0.116042	no
XLOC_037113	XLOC_037113	LOC_Os05g06940	relA-SpoT like protein RSH4, putative, expressed	-INF	Down Regulated	Chr5:3638116-3640497	HCR1	H48	OK	2.49846	0	#NAME?	5e-05	0.00429853	yes
XLOC_039411	XLOC_039411	LOC_Os05g07100	retrotransposon protein, putative, unclassified	-INF	Down Regulated	Chr5:3743749-3752877	HCR1	H48	OK	8.69972	0	#NAME?	0.0017	0.04679	yes
XLOC_037149	XLOC_037149	LOC_Os05g07970	transposon protein, putative, unclassified, expressed	-INF	Down Regulated	Chr5:4315276-4316776	HCR1	H48	OK	0.515824	0	#NAME?	0.0013	0.0387745	yes
XLOC_037172	XLOC_037172	LOC_Os05g08510	glucosyltransferase, putative	-INF	Down Regulated	Chr5:4644189-4645602	HCR1	H48	OK	3.92064	0	#NAME?	5e-05	0.00429853	yes
XLOC_039545	XLOC_039545	LOC_Os05g09724	HAD superfamily phosphatase, putative, expressed	-INF	Down Regulated	Chr5:5508395-5510290	HCR1	H48	OK	8.49803	0	#NAME?	5e-05	0.00429853	yes
XLOC_039550	XLOC_039550	LOC_Os05g10210	HAD superfamily phosphatase, putative, expressed	-INF	Down Regulated	Chr5:5553627-5554934	HCR1	H48	OK	0.998476	0	#NAME?	0.00085	0.0291957	yes
XLOC_039560	XLOC_039560	LOC_Os05g10370	acid phosphatase, putative, expressed	-INF	Down Regulated	Chr5:5652658-5654777	HCR1	H48	OK	1.36158	0	#NAME?	0.0008	0.0291957	yes
XLOC_037282	XLOC_037282	LOC_Os05g11210	lachrymatory factor synthase, putative, expressed	-INF	Down Regulated	Chr5:6333106-6333908	HCR1	H48	OK	3.28893	0	#NAME?	0.00045	0.0222941	yes
XLOC_039674	XLOC_039674	LOC_Os05g12600	expressed protein	-INF	Down Regulated	Chr5:7229137-7233209	HCR1	H48	OK	2.88582	0	#NAME?	5e-05	0.00429853	yes
XLOC_037347	XLOC_037347	LOC_Os05g12630	expressed protein	-INF	Down Regulated	Chr5:7249977-7251397	HCR1	H48	OK	0.763359	0	#NAME?	0.0013	0.0387745	yes
XLOC_037384	XLOC_037384	LOC_Os05g13904	expressed protein	-INF	Down Regulated	Chr5:7721627-7748295	HCR1	H48	OK	1.22648	0	#NAME?	0.00275	0.0645643	no
XLOC_039723	XLOC_039723	LOC_Os05g14034	expressed protein	-INF	Down Regulated	Chr5:7845333-7846279	HCR1	H48	OK	0.777358	0	#NAME?	0.00145	0.0409502	yes
XLOC_039828	XLOC_039828	LOC_Os05g16280	transposon protein, putative, unclassified, expressed	-INF	Down Regulated	Chr5:9217012-9222943	HCR1	H48	OK	2.25725	0	#NAME?	5e-05	0.00429853	yes
XLOC_037506	XLOC_037506	LOC_Os05g16395	expressed protein	-INF	Down Regulated	Chr5:9294876-9295287	HCR1	H48	OK	31.5176	0	#NAME?	0.00075	0.0286569	yes
XLOC_037684	XLOC_037684	LOC_Os05g20010	expressed protein	-INF	Down Regulated	Chr5:11697489-11698408	HCR1	H48	OK	2.90041	0	#NAME?	0.00385	0.0771319	no
XLOC_037740	XLOC_037740	LOC_Os05g22280	retrotransposon, putative, centromere-specific, expressed	-INF	Down Regulated	Chr5:12612608-12613666	HCR1	H48	OK	1.30326	0	#NAME?	0.00055	0.0253173	yes
XLOC_040128	XLOC_040128	LOC_Os05g23200	expressed protein	-INF	Down Regulated	Chr5:13235405-13238034	HCR1	H48	OK	0.462155	0	#NAME?	0.0038	0.0771319	no
XLOC_037846	XLOC_037846	LOC_Os05g24654	transposon protein, putative, unclassified, expressed	-INF	Down Regulated	Chr5:14251995-14255507	HCR1	H48	OK	0.901277	0	#NAME?	0.00045	0.0222941	yes
XLOC_037869	XLOC_037869	LOC_Os05g25220	expressed protein	-INF	Down Regulated	Chr5:14620423-14622452	HCR1	H48	OK	0.814018	0	#NAME?	0.0007	0.0282221	yes
XLOC_037910	XLOC_037910	LOC_Os05g25900	expressed protein	-INF	Down Regulated	Chr5:15067042-15067267	HCR1	H48	OK	15.5091	0	#NAME?	0.0074	0.116042	no
XLOC_040348	XLOC_040348	LOC_Os05g27890	expressed protein	-INF	Down Regulated	Chr5:16276931-16280063	HCR1	H48	OK	10.564	0	#NAME?	5e-05	0.00429853	yes
XLOC_040514	XLOC_040514	LOC_Os05g31744	expressed protein	-INF	Down Regulated	Chr5:18489774-18490672	HCR1	H48	OK	2.26195	0	#NAME?	0.00045	0.0222941	yes
XLOC_038195	XLOC_038195	LOC_Os05g32300	expressed protein	-INF	Down Regulated	Chr5:18830269-18831070	HCR1	H48	OK	3.71604	0	#NAME?	5e-05	0.00429853	yes
XLOC_038326	XLOC_038326	LOC_Os05g34810	DUF538 domain containing protein, putative, expressed	-INF	Down Regulated	Chr5:20651215-20651856	HCR1	H48	OK	1.17047	0	#NAME?	0.0023	0.0561646	no
XLOC_038337	XLOC_038337	LOC_Os05g35000	expressed protein	-INF	Down Regulated	Chr5:20790344-20792137	HCR1	H48	OK	4.81919	0	#NAME?	0.0017	0.04679	yes
XLOC_040779	XLOC_040779	LOC_Os05g37560	expressed protein	-INF	Down Regulated	Chr5:21985911-21987261	HCR1	H48	OK	5.87185	0	#NAME?	0.0023	0.0561646	no
XLOC_038723	XLOC_038723	LOC_Os05g43870	myosin heavy chain-related, putative, expressed	-INF	Down Regulated	Chr5:25508218-25510626	HCR1	H48	OK	1.47268	0	#NAME?	0.0002	0.0124383	yes
XLOC_038966	XLOC_038966	LOC_Os05g48830	expressed protein	-INF	Down Regulated	Chr5:27988106-27988626	HCR1	H48	OK	6.05864	0	#NAME?	5e-05	0.00429853	yes
XLOC_038997	XLOC_038997	LOC_Os05g49340	expressed protein	-INF	Down Regulated	Chr5:28304628-28305135	HCR1	H48	OK	1.10974	0	#NAME?	0.00585	0.099416	no
XLOC_041333	XLOC_041333	LOC_Os05g50350	MYB family transcription factor, putative, expressed	-INF	Down Regulated	Chr5:28848044-28850435	HCR1	H48	OK	0.730051	0	#NAME?	0.00195	0.050937	no
XLOC_039066	XLOC_039066	LOC_Os05g50680	WRKY83, expressed	-INF	Down Regulated	Chr5:29051282-29052437	HCR1	H48	OK	1.78193	0	#NAME?	0.0007	0.0282221	yes
XLOC_041648	XLOC_041648	LOC_Os06g01220	expressed protein	-INF	Down Regulated	Chr6:150984-152936	HCR1	H48	OK	11.0422	0	#NAME?	0.00395	0.0784898	no
XLOC_042059	XLOC_042059	LOC_Os06g09520	expressed protein	-INF	Down Regulated	Chr6:4839627-4840128	HCR1	H48	OK	1.50903	0	#NAME?	0.0023	0.0561646	no
XLOC_042105	XLOC_042105	LOC_Os06g10350	MYB family transcription factor, putative, expressed	-INF	Down Regulated	Chr6:5315177-5316875	HCR1	H48	OK	2.268	0	#NAME?	5e-05	0.00429853	yes
XLOC_042139	XLOC_042139	LOC_Os06g10860	glucosyltransferase, putative, expressed	-INF	Down Regulated	Chr6:5661333-5665309	HCR1	H48	OK	2.44905	0	#NAME?	0.0003	0.0170603	yes
XLOC_042188	XLOC_042188	LOC_Os06g11970	OsMADS63 - MADS-box family gene with MIKC* type-box, expressed	-INF	Down Regulated	Chr6:6372352-6376374	HCR1	H48	OK	11.4826	0	#NAME?	5e-05	0.00429853	yes
XLOC_044607	XLOC_044607	LOC_Os06g13040	glycosyl hydrolases family 16, putative, expressed	-INF	Down Regulated	Chr6:7144203-7146074	HCR1	H48	OK	0.594205	0	#NAME?	0.00145	0.0409502	yes
XLOC_042291	XLOC_042291	LOC_Os06g14220	STF-1, putative, expressed	-INF	Down Regulated	Chr6:7933983-7935241	HCR1	H48	OK	2.27316	0	#NAME?	5e-05	0.00429853	yes
XLOC_044676	XLOC_044676	LOC_Os06g14350	caleosin related protein, putative, expressed	-INF	Down Regulated	Chr6:7996890-8004842	HCR1	H48	OK	8.28341	0	#NAME?	5e-05	0.00429853	yes
XLOC_044721	XLOC_044721	LOC_Os06g15250	3-ketoacyl-CoA synthase, putative, expressed	-INF	Down Regulated	Chr6:8645290-8646805	HCR1	H48	OK	1.75078	0	#NAME?	0.00035	0.0191224	yes
XLOC_042417	XLOC_042417	LOC_Os06g16940	retrotransposon protein, putative, Ty1-copia subclass, expressed	-INF	Down Regulated	Chr6:9816569-9818612	HCR1	H48	OK	2.3474	0	#NAME?	0.00105	0.0341017	yes
XLOC_042420	XLOC_042420	LOC_Os06g17110	glycosyltransferase, putative, expressed	-INF	Down Regulated	Chr6:9916481-9922826	HCR1	H48	OK	4.56082	0	#NAME?	5e-05	0.00429853	yes
XLOC_042420	XLOC_042420	LOC_Os06g17120	UDP-glucoronosyl and UDP-glucosyl transferase domain containing protein, expressed	-INF	Down Regulated	Chr6:9916481-9922826	HCR1	H48	OK	4.56082	0	#NAME?	5e-05	0.00429853	yes
XLOC_044843	XLOC_044843	LOC_Os06g17560	cadmium tolerance factor, putative, expressed	-INF	Down Regulated	Chr6:10184015-10185176	HCR1	H48	OK	0.796296	0	#NAME?	0.00195	0.050937	no
XLOC_042446	XLOC_042446	LOC_Os06g17730	plastocyanin-like domain containing protein, putative, expressed	-INF	Down Regulated	Chr6:10287636-10288678	HCR1	H48	OK	2.49182	0	#NAME?	0.0008	0.0291957	yes
XLOC_044908	XLOC_044908	LOC_Os06g19490	expressed protein	-INF	Down Regulated	Chr6:11100795-11101293	HCR1	H48	OK	0.95511	0	#NAME?	0.0074	0.116042	no
XLOC_044982	XLOC_044982	LOC_Os06g20890	retrotransposon protein, putative, unclassified, expressed	-INF	Down Regulated	Chr6:12074388-12075747	HCR1	H48	OK	1.04858	0	#NAME?	0.0038	0.0771319	no
XLOC_042639	XLOC_042639	LOC_Os06g22110	retrotransposon protein, putative, unclassified, expressed	-INF	Down Regulated	Chr6:12836895-12837436	HCR1	H48	OK	1.2537	0	#NAME?	0.00385	0.0771319	no
XLOC_045086	XLOC_045086	LOC_Os06g23050	expressed protein	-INF	Down Regulated	Chr6:13444112-13444616	HCR1	H48	OK	0.776932	0	#NAME?	0.0074	0.116042	no
XLOC_042722	XLOC_042722	LOC_Os06g23910	expressed protein	-INF	Down Regulated	Chr6:13971336-13973750	HCR1	H48	OK	0.672931	0	#NAME?	0.0023	0.0561646	no
XLOC_045135	XLOC_045135	LOC_Os06g24180	cytochrome P450 84A1, putative, expressed	-INF	Down Regulated	Chr6:14150815-14153224	HCR1	H48	OK	0.472263	0	#NAME?	0.00145	0.0409502	yes
XLOC_045296	XLOC_045296	LOC_Os06g28510	retrotransposon protein, putative, unclassified, expressed	-INF	Down Regulated	Chr6:16208402-16211076	HCR1	H48	OK	1.00434	0	#NAME?	0.00085	0.0291957	yes
XLOC_043251	XLOC_043251	LOC_Os06g36340	expressed protein	-INF	Down Regulated	Chr6:21326477-21330844	HCR1	H48	OK	0.50377	0	#NAME?	0.0074	0.116042	no
XLOC_043303	XLOC_043303	LOC_Os06g37550	expressed protein	-INF	Down Regulated	Chr6:22234341-22239575	HCR1	H48	OK	11.0502	0	#NAME?	0.00255	0.0608958	no
XLOC_043408	XLOC_043408	LOC_Os06g39515	expressed protein	-INF	Down Regulated	Chr6:23458895-23464913	HCR1	H48	OK	1.19983	0	#NAME?	0.0023	0.0561646	no
XLOC_043477	XLOC_043477	LOC_Os06g40700	OsSub50 - Putative Subtilisin homologue, expressed	-INF	Down Regulated	Chr6:24258512-24264055	HCR1	H48	OK	17.7584	0	#NAME?	5e-05	0.00429853	yes
XLOC_043550	XLOC_043550	LOC_Os06g42080	retrotransposon protein, putative, unclassified, expressed	-INF	Down Regulated	Chr6:25278366-25280200	HCR1	H48	OK	0.926972	0	#NAME?	0.0006	0.0268165	yes
XLOC_045982	XLOC_045982	LOC_Os06g42420	transposon protein, putative, unclassified, expressed	-INF	Down Regulated	Chr6:25493393-25497508	HCR1	H48	OK	0.545405	0	#NAME?	0.00815	0.12479	no
XLOC_045985	XLOC_045985	LOC_Os06g42470	expressed protein	-INF	Down Regulated	Chr6:25524536-25525259	HCR1	H48	OK	2.05993	0	#NAME?	0.00085	0.0291957	yes
XLOC_046003	XLOC_046003	LOC_Os06g42860	triacylglycerol lipase precursor, putative, expressed	-INF	Down Regulated	Chr6:25754837-25757613	HCR1	H48	OK	9.36502	0	#NAME?	5e-05	0.00429853	yes
XLOC_043589	XLOC_043589	LOC_Os06g42870	transposon protein, putative, Pong sub-class, expressed	-INF	Down Regulated	Chr6:25758775-25759774	HCR1	H48	OK	1.09094	0	#NAME?	0.0007	0.0282221	yes
XLOC_043800	XLOC_043800	LOC_Os06g47170	retrotransposon protein, putative, unclassified, expressed	-INF	Down Regulated	Chr6:28600113-28615167	HCR1	H48	OK	0.977926	0	#NAME?	0.00265	0.0627202	no
XLOC_046269	XLOC_046269	LOC_Os06g48010	peroxidase precursor, putative, expressed	-INF	Down Regulated	Chr6:29027002-29028481	HCR1	H48	OK	0.471028	0	#NAME?	0.00385	0.0771319	no
XLOC_043992	XLOC_043992	LOC_Os06g51000	carrier, putative, expressed	-INF	Down Regulated	Chr6:30866012-30866879	HCR1	H48	OK	3.16204	0	#NAME?	0.00085	0.0291957	yes
XLOC_046724	XLOC_046724	LOC_Os07g02270	expressed protein	-INF	Down Regulated	Chr7:736014-738719	HCR1	H48	OK	1.64127	0	#NAME?	0.0038	0.0771319	no
XLOC_046726	XLOC_046726	LOC_Os07g02310	retrotransposon protein, putative, Ty3-gypsy subclass, expressed	-INF	Down Regulated	Chr7:772820-777685	HCR1	H48	OK	0.820633	0	#NAME?	5e-05	0.00429853	yes
XLOC_046835	XLOC_046835	LOC_Os07g04630	expressed protein	-INF	Down Regulated	Chr7:2054424-2056550	HCR1	H48	OK	2.0965	0	#NAME?	0.00105	0.0341017	yes
XLOC_046916	XLOC_046916	LOC_Os07g06380	peroxidase precursor, putative, expressed	-INF	Down Regulated	Chr7:3101710-3104241	HCR1	H48	OK	1.48095	0	#NAME?	0.00145	0.0409502	yes
XLOC_049368	XLOC_049368	LOC_Os07g09110	OsFBX219 - F-box domain containing protein, expressed	-INF	Down Regulated	Chr7:4758157-4760320	HCR1	H48	OK	0.618727	0	#NAME?	0.0002	0.0124383	yes
XLOC_047116	XLOC_047116	LOC_Os07g10220	anthocyanidin 3-O-glucosyltransferase, putative, expressed	-INF	Down Regulated	Chr7:5490709-5491258	HCR1	H48	OK	0.872995	0	#NAME?	0.0074	0.116042	no
XLOC_049436	XLOC_049436	LOC_Os07g10550	cyclin-related protein, putative, expressed	-INF	Down Regulated	Chr7:5702782-5711287	HCR1	H48	OK	18.5502	0	#NAME?	5e-05	0.00429853	yes
XLOC_049576	XLOC_049576	LOC_Os07g13310	RALFL10 - Rapid ALkalinization Factor RALF family protein precursor, putative, expressed	-INF	Down Regulated	Chr7:7636366-7637412	HCR1	H48	OK	19.7062	0	#NAME?	0.00065	0.0282221	yes
XLOC_049583	XLOC_049583	LOC_Os07g13440	RALFL12 - Rapid ALkalinization Factor RALF family protein precursor, putative, expressed	-INF	Down Regulated	Chr7:7708590-7708815	HCR1	H48	OK	804.471	0	#NAME?	5e-05	0.00429853	yes
XLOC_049584	XLOC_049584	LOC_Os07g13450	RALFL13 - Rapid ALkalinization Factor RALF family protein precursor, expressed	-INF	Down Regulated	Chr7:7710561-7711063	HCR1	H48	OK	13.6544	0	#NAME?	0.00075	0.0286569	yes
XLOC_049592	XLOC_049592	LOC_Os07g13570	expressed protein	-INF	Down Regulated	Chr7:7785586-7786105	HCR1	H48	OK	3.50953	0	#NAME?	0.00075	0.0286569	yes
XLOC_047284	XLOC_047284	LOC_Os07g13930	OsFBX231 - F-box domain containing protein, expressed	-INF	Down Regulated	Chr7:7966459-7967814	HCR1	H48	OK	2.61858	0	#NAME?	5e-05	0.00429853	yes
XLOC_049756	XLOC_049756	LOC_Os07g17040	Mak16 protein domain containing protein, expressed	-INF	Down Regulated	Chr7:10030858-INF34702	HCR1	H48	OK	8.0393	0	#NAME?	5e-05	0.00429853	yes
XLOC_047483	XLOC_047483	LOC_Os07g18110	expressed protein	-INF	Down Regulated	Chr7:10716440-10718623	HCR1	H48	OK	1.16693	0	#NAME?	0.00085	0.0291957	yes
XLOC_047491	XLOC_047491	LOC_Os07g18210	transposon protein, putative, CACTA, En/Spm sub-class, expressed	-INF	Down Regulated	Chr7:10793762-10801985	HCR1	H48	OK	2.21674	0	#NAME?	0.00575	0.099416	no
XLOC_049862	XLOC_049862	LOC_Os07g19160	expressed protein	-INF	Down Regulated	Chr7:11339154-11341017	HCR1	H48	OK	0.861115	0	#NAME?	0.00585	0.099416	no
XLOC_049891	XLOC_049891	LOC_Os07g20270	expressed protein	-INF	Down Regulated	Chr7:11684673-11687264	HCR1	H48	OK	4.40234	0	#NAME?	5e-05	0.00429853	yes
XLOC_050088	XLOC_050088	LOC_Os07g25370	myb-like DNA-binding domain containing protein, expressed	-INF	Down Regulated	Chr7:14502053-14502632	HCR1	H48	OK	1.01461	0	#NAME?	0.00585	0.099416	no
XLOC_047807	XLOC_047807	LOC_Os07g26200	expressed protein	-INF	Down Regulated	Chr7:15062973-15065450	HCR1	H48	OK	1.22636	0	#NAME?	0.00265	0.0627202	no
XLOC_047820	XLOC_047820	LOC_Os07g26460	GLTP domain containing protein, putative, expressed	-INF	Down Regulated	Chr7:15221077-15223063	HCR1	H48	OK	0.860226	0	#NAME?	0.0007	0.0282221	yes
XLOC_050204	XLOC_050204	LOC_Os07g27980	BBTI10 - Bowman-Birk type bran trypsin inhibitor precursor, expressed	-INF	Down Regulated	Chr7:16324699-16327556	HCR1	H48	OK	1.01462	0	#NAME?	0.0008	0.0291957	yes
XLOC_047974	XLOC_047974	LOC_Os07g29280	expressed protein	-INF	Down Regulated	Chr7:17159545-17159773	HCR1	H48	OK	41.6831	0	#NAME?	0.0013	0.0387745	yes
XLOC_047976	XLOC_047976	LOC_Os07g29310	OsSAUR30 - Auxin-responsive SAUR gene family member, expressed	-INF	Down Regulated	Chr7:17186672-17187640	HCR1	H48	OK	0.45543	0	#NAME?	0.00385	0.0771319	no
XLOC_048018	XLOC_048018	LOC_Os07g30154	POEI2 - Pollen Ole e I allergen and extensin family protein precursor, putative, expressed	-INF	Down Regulated	Chr7:17805411-17805971	HCR1	H48	OK	0.987493	0	#NAME?	0.00585	0.099416	no
XLOC_048091	XLOC_048091	LOC_Os07g31620	transposon protein, putative, Pong sub-class, expressed	-INF	Down Regulated	Chr7:18772509-18774549	HCR1	H48	OK	1.24819	0	#NAME?	0.00085	0.0291957	yes
XLOC_048298	XLOC_048298	LOC_Os07g35880	beta-amylase, putative, expressed	-INF	Down Regulated	Chr7:21471054-21473327	HCR1	H48	OK	4.25074	0	#NAME?	5e-05	0.00429853	yes
XLOC_050622	XLOC_050622	LOC_Os07g37385	LTPL109 - Protease inhibitor/seed storage/LTP family protein precursor, expressed	-INF	Down Regulated	Chr7:22404279-22405209	HCR1	H48	OK	3.45277	0	#NAME?	5e-05	0.00429853	yes
XLOC_050725	XLOC_050725	LOC_Os07g39440	zinc finger family protein, putative, expressed	-INF	Down Regulated	Chr7:23624363-23627708	HCR1	H48	OK	0.495771	0	#NAME?	0.001	0.0329538	yes
XLOC_050753	XLOC_050753	LOC_Os07g40100	POEI22 - Pollen Ole e I allergen and extensin family protein precursor, expressed	-INF	Down Regulated	Chr7:24066734-24067643	HCR1	H48	OK	4.10522	0	#NAME?	5e-05	0.00429853	yes
XLOC_050795	XLOC_050795	LOC_Os07g40910	expressed protein	-INF	Down Regulated	Chr7:24487816-24488449	HCR1	H48	OK	1.51006	0	#NAME?	0.0013	0.0387745	yes
XLOC_050806	XLOC_050806	LOC_Os07g41150	glycerophosphoryl diester phosphodiesterase family protein, putative, expressed	-INF	Down Regulated	Chr7:24628261-24629732	HCR1	H48	OK	14.8769	0	#NAME?	5e-05	0.00429853	yes
XLOC_050837	XLOC_050837	LOC_Os07g41840	expressed protein	-INF	Down Regulated	Chr7:25060922-25061427	HCR1	H48	OK	1.96849	0	#NAME?	0.0023	0.0561646	no
XLOC_050901	XLOC_050901	LOC_Os07g43500	expressed protein	-INF	Down Regulated	Chr7:26033184-26035241	HCR1	H48	OK	14.2319	0	#NAME?	5e-05	0.00429853	yes
XLOC_050930	XLOC_050930	LOC_Os07g44250	dirigent, putative, expressed	-INF	Down Regulated	Chr7:26445631-26450643	HCR1	H48	OK	1.93944	0	#NAME?	5e-05	0.00429853	yes
XLOC_050930	XLOC_050930	LOC_Os07g44260	dirigent, putative, expressed	-INF	Down Regulated	Chr7:26445631-26450643	HCR1	H48	OK	1.93944	0	#NAME?	5e-05	0.00429853	yes
XLOC_048727	XLOC_048727	LOC_Os07g44380	dirigent, putative, expressed	-INF	Down Regulated	Chr7:26520034-26520690	HCR1	H48	OK	1.0358	0	#NAME?	0.0023	0.0561646	no
XLOC_050987	XLOC_050987	LOC_Os07g45520	expressed protein	-INF	Down Regulated	Chr7:27154948-27155601	HCR1	H48	OK	0.525958	0	#NAME?	0.0074	0.116042	no
XLOC_048918	XLOC_048918	LOC_Os07g47960	basic helix-loop-helix domain containing protein, expressed	-INF	Down Regulated	Chr7:28649694-28651636	HCR1	H48	OK	0.712893	0	#NAME?	0.00085	0.0291957	yes
XLOC_048930	XLOC_048930	LOC_Os07g48190	expressed protein	-INF	Down Regulated	Chr7:28784734-28785232	HCR1	H48	OK	1.47978	0	#NAME?	0.0038	0.0771319	no
XLOC_051362	XLOC_051362	LOC_Os08g01240	expressed protein	-INF	Down Regulated	Chr8:159114-159939	HCR1	H48	OK	0.452126	0	#NAME?	0.0074	0.116042	no
XLOC_051371	XLOC_051371	LOC_Os08g01520	cytochrome P450, putative, expressed	-INF	Down Regulated	Chr8:318964-321012	HCR1	H48	OK	0.826277	0	#NAME?	0.0005	0.0238029	yes
XLOC_053638	XLOC_053638	LOC_Os08g03460	retrotransposon protein, putative, unclassified, expressed	-INF	Down Regulated	Chr8:1625509-1627489	HCR1	H48	OK	0.466314	0	#NAME?	0.00385	0.0771319	no
XLOC_051467	XLOC_051467	LOC_Os08g03510	MBTB18 - Bric-a-Brac, Tramtrack, Broad Complex BTB domain with Meprin and TRAF Homology MATH domain, expressed	-INF	Down Regulated	Chr8:1642221-1643355	HCR1	H48	OK	0.474065	0	#NAME?	0.0074	0.116042	no
XLOC_053648	XLOC_053648	LOC_Os08g03700	glycerol-3-phosphate acyltransferase, putative, expressed	-INF	Down Regulated	Chr8:1757710-1759198	HCR1	H48	OK	0.932583	0	#NAME?	0.00085	0.0291957	yes
XLOC_053652	XLOC_053652	LOC_Os08g03770	expressed protein	-INF	Down Regulated	Chr8:1793340-1795064	HCR1	H48	OK	0.868953	0	#NAME?	0.0001	0.00743766	yes
XLOC_051481	XLOC_051481	LOC_Os08g03780	retrotransposon protein, putative, Ty3-gypsy subclass, expressed	-INF	Down Regulated	Chr8:1795559-1799216	HCR1	H48	OK	1.57597	0	#NAME?	5e-05	0.00429853	yes
XLOC_051482	XLOC_051482	LOC_Os08g03790	expressed protein	-INF	Down Regulated	Chr8:1799782-1801269	HCR1	H48	OK	0.623854	0	#NAME?	0.0013	0.0387745	yes
XLOC_053715	XLOC_053715	LOC_Os08g05010	retrotransposon protein, putative, unclassified, expressed	-INF	Down Regulated	Chr8:2566654-2570252	HCR1	H48	OK	3.66068	0	#NAME?	0.0001	0.00743766	yes
XLOC_051603	XLOC_051603	LOC_Os08g06410	expressed protein	-INF	Down Regulated	Chr8:3591159-3593899	HCR1	H48	OK	1.53469	0	#NAME?	0.00045	0.0222941	yes
XLOC_051605	XLOC_051605	LOC_Os08g06440	secretory carrier-associated membrane protein 5, putative, expressed	-INF	Down Regulated	Chr8:3616252-3619136	HCR1	H48	OK	3.90846	0	#NAME?	5e-05	0.00429853	yes
XLOC_051663	XLOC_051663	LOC_Os08g07600	expressed protein	-INF	Down Regulated	Chr8:4268282-4268975	HCR1	H48	OK	10.9463	0	#NAME?	5e-05	0.00429853	yes
XLOC_053933	XLOC_053933	LOC_Os08g09650	OsFBX269 - F-box domain containing protein, expressed	-INF	Down Regulated	Chr8:5576466-5578655	HCR1	H48	OK	0.587277	0	#NAME?	0.0038	0.0771319	no
XLOC_054113	XLOC_054113	LOC_Os08g13310	expressed protein	-INF	Down Regulated	Chr8:7908240-7909012	HCR1	H48	OK	1.88121	0	#NAME?	0.00195	0.050937	no
XLOC_054153	XLOC_054153	LOC_Os08g13980	glycosyl hydrolases family 16, putative, expressed	-INF	Down Regulated	Chr8:8159732-8484859	HCR1	H48	OK	5.09936	0	#NAME?	0.0087	0.131422	no
XLOC_054217	XLOC_054217	LOC_Os08g15505	expressed protein	-INF	Down Regulated	Chr8:9433418-9433889	HCR1	H48	OK	212.289	0	#NAME?	5e-05	0.00429853	yes
XLOC_054222	XLOC_054222	LOC_Os08g15550	DEFL56 - Defensin and Defensin-like DEFL family, expressed	-INF	Down Regulated	Chr8:9458768-9459482	HCR1	H48	OK	50.582	0	#NAME?	0.00045	0.0222941	yes
XLOC_054276	XLOC_054276	LOC_Os08g16490	retrotransposon protein, putative, unclassified, expressed	-INF	Down Regulated	Chr8:10108275-10109184	HCR1	H48	OK	1.20435	0	#NAME?	0.00385	0.0771319	no
XLOC_054410	XLOC_054410	LOC_Os08g19780	expressed protein	-INF	Down Regulated	Chr8:11849254-11849884	HCR1	H48	OK	6.84677	0	#NAME?	5e-05	0.00429853	yes
XLOC_052248	XLOC_052248	LOC_Os08g19790	retrotransposon protein, putative, Ty3-gypsy subclass, expressed	-INF	Down Regulated	Chr8:11850808-11851754	HCR1	H48	OK	3.33197	0	#NAME?	0.00075	0.0286569	yes
XLOC_054619	XLOC_054619	LOC_Os08g24434	expressed protein	-INF	Down Regulated	Chr8:14760283-14766266	HCR1	H48	OK	0.561785	0	#NAME?	0.0007	0.0282221	yes
XLOC_054637	XLOC_054637	LOC_Os08g24830	OsFBDUF44 - F-box and DUF domain containing protein, expressed	-INF	Down Regulated	Chr8:15019903-15021160	HCR1	H48	OK	0.883941	0	#NAME?	0.00145	0.0409502	yes
XLOC_052519	XLOC_052519	LOC_Os08g25470	expressed protein	-INF	Down Regulated	Chr8:15502177-15503521	HCR1	H48	OK	0.96365	0	#NAME?	0.00195	0.050937	no
XLOC_052556	XLOC_052556	LOC_Os08g26310	expressed protein	-INF	Down Regulated	Chr8:16048182-16049514	HCR1	H48	OK	1.35255	0	#NAME?	0.00585	0.099416	no
XLOC_052559	XLOC_052559	LOC_Os08g26370	hypothetical protein	-INF	Down Regulated	Chr8:16073041-16073702	HCR1	H48	OK	2.70634	0	#NAME?	0.0074	0.116042	no
XLOC_052666	XLOC_052666	LOC_Os08g28530	retrotransposon protein, putative, unclassified, expressed	-INF	Down Regulated	Chr8:17422177-17426301	HCR1	H48	OK	1.45989	0	#NAME?	5e-05	0.00429853	yes
XLOC_052677	XLOC_052677	LOC_Os08g28790	dirigent, putative, expressed	-INF	Down Regulated	Chr8:17613570-17615014	HCR1	H48	OK	8.31811	0	#NAME?	5e-05	0.00429853	yes
XLOC_052687	XLOC_052687	LOC_Os08g28930	retrotransposon protein, putative, unclassified, expressed	-INF	Down Regulated	Chr8:17687174-17693657	HCR1	H48	OK	0.83248	0	#NAME?	0.00075	0.0286569	yes
XLOC_054929	XLOC_054929	LOC_Os08g31130	integral membrane protein DUF6 containing protein, expressed	-INF	Down Regulated	Chr8:19220447-19227521	HCR1	H48	OK	6.32174	0	#NAME?	5e-05	0.00429853	yes
XLOC_052798	XLOC_052798	LOC_Os08g31200	cytokinin-O-glucosyltransferase 2, putative, expressed	-INF	Down Regulated	Chr8:19292820-19294909	HCR1	H48	OK	3.34416	0	#NAME?	5e-05	0.00429853	yes
XLOC_054972	XLOC_054972	LOC_Os08g31920	retrotransposon protein, putative, unclassified, expressed	-INF	Down Regulated	Chr8:19787211-19789539	HCR1	H48	OK	1.06725	0	#NAME?	5e-05	0.00429853	yes
XLOC_052926	XLOC_052926	LOC_Os08g33600	retrotransposon protein, putative, unclassified, expressed	-INF	Down Regulated	Chr8:20982695-20984300	HCR1	H48	OK	0.712732	0	#NAME?	0.00075	0.0286569	yes
XLOC_052940	XLOC_052940	LOC_Os08g33800	MYB family transcription factor, putative, expressed	-INF	Down Regulated	Chr8:21155523-21157775	HCR1	H48	OK	1.84032	0	#NAME?	0.0006	0.0268165	yes
XLOC_053000	XLOC_053000	LOC_Os08g35070	protein binding protein, putative, expressed	-INF	Down Regulated	Chr8:22107278-22108739	HCR1	H48	OK	1.25367	0	#NAME?	0.00075	0.0286569	yes
XLOC_053005	XLOC_053005	LOC_Os08g35140	hypothetical protein	-INF	Down Regulated	Chr8:22149958-22153586	HCR1	H48	OK	0.992111	0	#NAME?	5e-05	0.00429853	yes
XLOC_053084	XLOC_053084	LOC_Os08g36750	NFKB, putative, expressed	-INF	Down Regulated	Chr8:23206855-23207906	HCR1	H48	OK	0.458937	0	#NAME?	0.0074	0.116042	no
XLOC_053240	XLOC_053240	LOC_Os08g39680	expressed protein	-INF	Down Regulated	Chr8:25116142-25120996	HCR1	H48	OK	2.41075	0	#NAME?	5e-05	0.00429853	yes
XLOC_055344	XLOC_055344	LOC_Os08g39800	retrotransposon protein, putative, unclassified	-INF	Down Regulated	Chr8:25193148-25193814	HCR1	H48	OK	0.90808	0	#NAME?	0.00195	0.050937	no
XLOC_053358	XLOC_053358	LOC_Os08g42480	expressed protein	-INF	Down Regulated	Chr8:26852211-26856597	HCR1	H48	OK	9.52461	0	#NAME?	5e-05	0.00429853	yes
XLOC_053390	XLOC_053390	LOC_Os08g43020	transferase family protein, putative, expressed	-INF	Down Regulated	Chr8:27195514-27197440	HCR1	H48	OK	0.996494	0	#NAME?	0.00075	0.0286569	yes
XLOC_055549	XLOC_055549	LOC_Os08g43654	MATE efflux family protein, putative, expressed	-INF	Down Regulated	Chr8:27592834-27598700	HCR1	H48	OK	1.44969	0	#NAME?	5e-05	0.00429853	yes
XLOC_053442	XLOC_053442	LOC_Os08g43980	carrier, putative, expressed	-INF	Down Regulated	Chr8:27693973-27694705	HCR1	H48	OK	0.634742	0	#NAME?	0.00195	0.050937	no
XLOC_053478	XLOC_053478	LOC_Os08g44670	calreticulin precursor, putative, expressed	-INF	Down Regulated	Chr8:28081378-28082672	HCR1	H48	OK	1.19709	0	#NAME?	0.00585	0.099416	no
XLOC_053491	XLOC_053491	LOC_Os08g45000	inorganic phosphate transporter, putative, expressed	-INF	Down Regulated	Chr8:28244201-28246028	HCR1	H48	OK	0.792073	0	#NAME?	0.00085	0.0291957	yes
XLOC_057670	XLOC_057670	LOC_Os09g03140	cytokinin-O-glucosyltransferase 2, putative, expressed	-INF	Down Regulated	Chr9:1503777-1505356	HCR1	H48	OK	3.39771	0	#NAME?	5e-05	0.00429853	yes
XLOC_063013	XLOC_063013	LOC_Os09g04730	dehydrogenase/reductase SDR family member 2, putative, expressed	-INF	Down Regulated	Chr9:2510224-2510731	HCR1	H48	OK	1.47275	0	#NAME?	0.00195	0.050937	no
XLOC_056076	XLOC_056076	LOC_Os09g06634	transposon protein, putative, Pong sub-class, expressed	-INF	Down Regulated	Chr9:3141877-3147421	HCR1	H48	OK	0.606725	0	#NAME?	5e-05	0.00429853	yes
XLOC_056251	XLOC_056251	LOC_Os09g10300	Skp1 family, dimerisation domain containing protein, expressed	-INF	Down Regulated	Chr9:5610376-5611035	HCR1	H48	OK	4.94205	0	#NAME?	5e-05	0.00429853	yes
XLOC_056310	XLOC_056310	LOC_Os09g11470	expressed protein	-INF	Down Regulated	Chr9:6392798-6393097	HCR1	H48	OK	6.63766	0	#NAME?	0.0074	0.116042	no
XLOC_061783	XLOC_061783	LOC_Os09g12900	expressed protein	-INF	Down Regulated	Chr9:7429108-7430249	HCR1	H48	OK	3.04518	0	#NAME?	5e-05	0.00429853	yes
XLOC_063085	XLOC_063085	LOC_Os09g12980	retrotransposon protein, putative, LINE subclass	-INF	Down Regulated	Chr9:7487054-7487504	HCR1	H48	OK	0.825996	0	#NAME?	0.0074	0.116042	no
XLOC_056520	XLOC_056520	LOC_Os09g16100	retrotransposon protein, putative, unclassified, expressed	-INF	Down Regulated	Chr9:9827313-9831620	HCR1	H48	OK	0.800724	0	#NAME?	5e-05	0.00429853	yes
XLOC_061969	XLOC_061969	LOC_Os09g16580	amidase family protein, putative, expressed	-INF	Down Regulated	Chr9:10174328-10180522	HCR1	H48	OK	7.03501	0	#NAME?	5e-05	0.00429853	yes
XLOC_056562	XLOC_056562	LOC_Os09g16970	expressed protein	-INF	Down Regulated	Chr9:10373584-10375584	HCR1	H48	OK	6.23883	0	#NAME?	0.0007	0.0282221	yes
XLOC_056638	XLOC_056638	LOC_Os09g19340	expressed protein	-INF	Down Regulated	Chr9:11565194-11569755	HCR1	H48	OK	1.22873	0	#NAME?	0.00055	0.0253173	yes
XLOC_056646	XLOC_056646	LOC_Os09g19550	SNARE domain containing protein, putative, expressed	-INF	Down Regulated	Chr9:11700471-11702738	HCR1	H48	OK	6.79664	0	#NAME?	5e-05	0.00429853	yes
XLOC_056718	XLOC_056718	LOC_Os09g20684	SMP-30/Gluconolaconase/LRE-like region containing protein, expressed	-INF	Down Regulated	Chr9:12454364-12460996	HCR1	H48	OK	0.498445	0	#NAME?	0.0038	0.0771319	no
XLOC_056736	XLOC_056736	LOC_Os09g21100	mov34/MPN/PAD-1 family protein, expressed	-INF	Down Regulated	Chr9:12721513-12726247	HCR1	H48	OK	0.451351	0	#NAME?	0.00075	0.0286569	yes
XLOC_056741	XLOC_056741	LOC_Os09g21240	expressed protein	-INF	Down Regulated	Chr9:12823746-12824039	HCR1	H48	OK	3.39624	0	#NAME?	0.00585	0.099416	no
XLOC_063166	XLOC_063166	LOC_Os09g21380	expressed protein	-INF	Down Regulated	Chr9:12915139-12915562	HCR1	H48	OK	0.942941	0	#NAME?	0.0074	0.116042	no
XLOC_058625	XLOC_058625	LOC_Os09g23930	retrotransposon protein, putative, unclassified, expressed	-INF	Down Regulated	Chr9:14271171-14273232	HCR1	H48	OK	0.764475	0	#NAME?	0.0038	0.0771319	no
XLOC_058627	XLOC_058627	LOC_Os09g23966	pollen allergen Cyn d 23, putative, expressed	-INF	Down Regulated	Chr9:14280453-14281362	HCR1	H48	OK	1.68573	0	#NAME?	0.0004	0.020991	yes
XLOC_062296	XLOC_062296	LOC_Os09g23980	retrotransposon protein, putative, unclassified, expressed	-INF	Down Regulated	Chr9:14282719-14286770	HCR1	H48	OK	21.624	0	#NAME?	5e-05	0.00429853	yes
XLOC_062297	XLOC_062297	LOC_Os09g23999	pollen allergen Cyn d 23, putative, expressed	-INF	Down Regulated	Chr9:14294061-14294830	HCR1	H48	OK	2.46816	0	#NAME?	5e-05	0.00429853	yes
XLOC_058630	XLOC_058630	LOC_Os09g24020	pollen allergen Cyn d 23, putative, expressed	-INF	Down Regulated	Chr9:14298007-14298822	HCR1	H48	OK	1.95662	0	#NAME?	0.00045	0.0222941	yes
XLOC_058637	XLOC_058637	LOC_Os09g24110	pollen allergen Cyn d 23, putative, expressed	-INF	Down Regulated	Chr9:14327861-14328614	HCR1	H48	OK	0.483284	0	#NAME?	0.00385	0.0771319	no
XLOC_058638	XLOC_058638	LOC_Os09g24120	pollen allergen Cyn d 23, putative, expressed	-INF	Down Regulated	Chr9:14329874-14330628	HCR1	H48	OK	20.5322	0	#NAME?	5e-05	0.00429853	yes
XLOC_062307	XLOC_062307	LOC_Os09g24130	pollen allergen Cyn d 23, putative, expressed	-INF	Down Regulated	Chr9:14331857-14332588	HCR1	H48	OK	10.1774	0	#NAME?	5e-05	0.00429853	yes
XLOC_058642	XLOC_058642	LOC_Os09g24159	pollen allergen Cyn d 23, putative, expressed	-INF	Down Regulated	Chr9:14344229-14344912	HCR1	H48	OK	15.5825	0	#NAME?	5e-05	0.00429853	yes
XLOC_062401	XLOC_062401	LOC_Os09g26240	transposon protein, putative, CACTA, En/Spm sub-class, expressed	-INF	Down Regulated	Chr9:15849808-15857835	HCR1	H48	OK	0.745575	0	#NAME?	0.0028	0.0653184	no
XLOC_056965	XLOC_056965	LOC_Os09g26490	alpha/beta hydrolase fold, putative, expressed	-INF	Down Regulated	Chr9:16009645-16010893	HCR1	H48	OK	3.0844	0	#NAME?	5e-05	0.00429853	yes
XLOC_057071	XLOC_057071	LOC_Os09g28450	paramyosin, putative, expressed	-INF	Down Regulated	Chr9:17309021-17312684	HCR1	H48	OK	3.71474	0	#NAME?	5e-05	0.00429853	yes
XLOC_062548	XLOC_062548	LOC_Os09g29350	phototropic-responsive NPH3 family protein, putative, expressed	-INF	Down Regulated	Chr9:17822799-17823255	HCR1	H48	OK	3.0836	0	#NAME?	0.00085	0.0291957	yes
XLOC_057173	XLOC_057173	LOC_Os09g30320	BURP domain containing protein, expressed	-INF	Down Regulated	Chr9:18456838-18458655	HCR1	H48	OK	104.784	0	#NAME?	5e-05	0.00429853	yes
XLOC_057214	XLOC_057214	LOC_Os09g31990	expressed protein	-INF	Down Regulated	Chr9:19088705-19089402	HCR1	H48	OK	1.46858	0	#NAME?	0.00195	0.050937	no
XLOC_059177	XLOC_059177	LOC_Os09g37290	hypothetical protein	-INF	Down Regulated	Chr9:21543713-21547295	HCR1	H48	OK	5.1693	0	#NAME?	5e-05	0.00429853	yes
XLOC_059177	XLOC_059177	LOC_Os09g37300	transporter, monovalent cation:proton antiporter-2 family, putative, expressed	-INF	Down Regulated	Chr9:21543713-21547295	HCR1	H48	OK	5.1693	0	#NAME?	5e-05	0.00429853	yes
XLOC_057502	XLOC_057502	LOC_Os09g39340	expressed protein	-INF	Down Regulated	Chr9:22622550-22627558	HCR1	H48	OK	0.87663	0	#NAME?	0.0014	0.0409502	yes
XLOC_007202	XLOC_007202	LOC_Os10g05980	POEI13 - Pollen Ole e I allergen and extensin family protein precursor, expressed	-INF	Down Regulated	Chr10:3016885-3018074	HCR1	H48	OK	1.67437	0	#NAME?	0.0005	0.0238029	yes
XLOC_009099	XLOC_009099	LOC_Os10g09000	expressed protein	-INF	Down Regulated	Chr10:4868026-4868366	HCR1	H48	OK	7.86651	0	#NAME?	0.0038	0.0771319	no
XLOC_009162	XLOC_009162	LOC_Os10g10400	expressed protein	-INF	Down Regulated	Chr10:5714331-5716013	HCR1	H48	OK	1.35798	0	#NAME?	0.0074	0.116042	no
XLOC_007418	XLOC_007418	LOC_Os10g10540	cysteine-rich repeat secretory protein precursor, putative, expressed	-INF	Down Regulated	Chr10:5821224-5828310	HCR1	H48	OK	0.524715	0	#NAME?	0.0005	0.0238029	yes
XLOC_009189	XLOC_009189	LOC_Os10g11022	expressed protein	-INF	Down Regulated	Chr10:6098672-6099210	HCR1	H48	OK	3.53128	0	#NAME?	0.0008	0.0291957	yes
XLOC_009352	XLOC_009352	LOC_Os10g16430	expressed protein	-INF	Down Regulated	Chr10:8192281-8193237	HCR1	H48	OK	0.68147	0	#NAME?	0.00385	0.0771319	no
XLOC_007628	XLOC_007628	LOC_Os10g17440	retrotransposon protein, putative, unclassified, expressed	-INF	Down Regulated	Chr10:8782905-8783805	HCR1	H48	OK	3.22846	0	#NAME?	5e-05	0.00429853	yes
XLOC_009437	XLOC_009437	LOC_Os10g18470	expressed protein	-INF	Down Regulated	Chr10:9384015-9384570	HCR1	H48	OK	3.72464	0	#NAME?	0.00085	0.0291957	yes
XLOC_009555	XLOC_009555	LOC_Os10g20840	LTPL134 - Protease inhibitor/seed storage/LTP family protein precursor, putative, expressed	-INF	Down Regulated	Chr10:10566417-10566927	HCR1	H48	OK	1.43901	0	#NAME?	0.0023	0.0561646	no
XLOC_009556	XLOC_009556	LOC_Os10g20860	protease inhibitor/seed storage/LTP family, putative, expressed	-INF	Down Regulated	Chr10:10570875-10573989	HCR1	H48	OK	1.1063	0	#NAME?	0.00585	0.099416	no
XLOC_007831	XLOC_007831	LOC_Os10g22080	expressed protein	-INF	Down Regulated	Chr10:11404706-11408924	HCR1	H48	OK	8.39799	0	#NAME?	5e-05	0.00429853	yes
XLOC_009679	XLOC_009679	LOC_Os10g23230	AT hook-containing MAR binding 1, putative, expressed	-INF	Down Regulated	Chr10:12119637-12120225	HCR1	H48	OK	0.916981	0	#NAME?	0.0074	0.116042	no
XLOC_009753	XLOC_009753	LOC_Os10g25100	expressed protein	-INF	Down Regulated	Chr10:12938064-12939704	HCR1	H48	OK	1.0192	0	#NAME?	0.00085	0.0291957	yes
XLOC_009762	XLOC_009762	LOC_Os10g25250	ZIM domain containing protein, putative, expressed	-INF	Down Regulated	Chr10:13042900-13046977	HCR1	H48	OK	0.756521	0	#NAME?	0.0023	0.0561646	no
XLOC_009966	XLOC_009966	LOC_Os10g30170	expressed protein	-INF	Down Regulated	Chr10:15683992-15684706	HCR1	H48	OK	0.711442	0	#NAME?	0.0074	0.116042	no
XLOC_008160	XLOC_008160	LOC_Os10g30310	zinc finger, C3HC4 type domain containing protein, expressed	-INF	Down Regulated	Chr10:15741906-15742308	HCR1	H48	OK	3.01613	0	#NAME?	0.0013	0.0387745	yes
XLOC_008166	XLOC_008166	LOC_Os10g30490	STRUBBELIG-RECEPTOR FAMILY 6 precursor, putative, expressed	-INF	Down Regulated	Chr10:15859879-15860335	HCR1	H48	OK	1.33109	0	#NAME?	0.00585	0.099416	no
XLOC_008360	XLOC_008360	LOC_Os10g34980	expressed protein	-INF	Down Regulated	Chr10:18664218-18664829	HCR1	H48	OK	1.50418	0	#NAME?	0.00195	0.050937	no
XLOC_010253	XLOC_010253	LOC_Os10g36520	expressed protein	-INF	Down Regulated	Chr10:19539635-19540530	HCR1	H48	OK	0.864761	0	#NAME?	0.0023	0.0561646	no
XLOC_008450	XLOC_008450	LOC_Os10g37020	transposon protein, putative, unclassified, expressed	-INF	Down Regulated	Chr10:19826810-19828235	HCR1	H48	OK	0.537788	0	#NAME?	0.0023	0.0561646	no
XLOC_008518	XLOC_008518	LOC_Os10g38540	glutathione S-transferase, putative, expressed	-INF	Down Regulated	Chr10:20574825-20576117	HCR1	H48	OK	0.873055	0	#NAME?	0.00105	0.0341017	yes
XLOC_010392	XLOC_010392	LOC_Os10g40000	retinol dehydrogenase 12, putative, expressed	-INF	Down Regulated	Chr10:21426956-21428453	HCR1	H48	OK	0.460578	0	#NAME?	0.00385	0.0771319	no
XLOC_010429	XLOC_010429	LOC_Os10g40710	expansin precursor, putative, expressed	-INF	Down Regulated	Chr10:21835929-21837651	HCR1	H48	OK	14.28	0	#NAME?	5e-05	0.00429853	yes
XLOC_010490	XLOC_010490	LOC_Os10g42080	expressed protein	-INF	Down Regulated	Chr10:22634983-22635802	HCR1	H48	OK	1.23428	0	#NAME?	0.00085	0.0291957	yes
XLOC_008705	XLOC_008705	LOC_Os10g42390	zinc finger, C3HC4 type domain containing protein, expressed	-INF	Down Regulated	Chr10:22818077-22818671	HCR1	H48	OK	5.13297	0	#NAME?	0.00055	0.0253173	yes
XLOC_010814	XLOC_010814	LOC_Os11g02810	expressed protein	-INF	Down Regulated	Chr11:940187-943223	HCR1	H48	OK	6.42643	0	#NAME?	5e-05	0.00429853	yes
XLOC_010823	XLOC_010823	LOC_Os11g02950	auxin efflux carrier component, putative, expressed	-INF	Down Regulated	Chr11:1019942-1025613	HCR1	H48	OK	0.608146	0	#NAME?	0.00025	0.0149744	yes
XLOC_012998	XLOC_012998	LOC_Os11g03770	expressed protein	-INF	Down Regulated	Chr11:1481579-1482552	HCR1	H48	OK	1.08814	0	#NAME?	0.00385	0.0771319	no
XLOC_013009	XLOC_013009	LOC_Os11g03980	OsCML2 - Calmodulin-related calcium sensor protein, expressed	-INF	Down Regulated	Chr11:1609279-1610131	HCR1	H48	OK	1.01966	0	#NAME?	0.0038	0.0771319	no
XLOC_013019	XLOC_013019	LOC_Os11g04120	hypothetical protein	-INF	Down Regulated	Chr11:1670894-1672816	HCR1	H48	OK	0.460868	0	#NAME?	0.0074	0.116042	no
XLOC_013062	XLOC_013062	LOC_Os11g04935	GIY-YIG catalytic domain containing protein, putative, expressed	-INF	Down Regulated	Chr11:2107580-2109325	HCR1	H48	OK	0.991337	0	#NAME?	0.00385	0.0771319	no
XLOC_010943	XLOC_010943	LOC_Os11g05420	expressed protein	-INF	Down Regulated	Chr11:2437762-2439993	HCR1	H48	OK	0.614227	0	#NAME?	0.00385	0.0771319	no
XLOC_013188	XLOC_013188	LOC_Os11g07430	proteophosphoglycan ppg1, putative, expressed	-INF	Down Regulated	Chr11:3737108-3739034	HCR1	H48	OK	0.528236	0	#NAME?	0.0007	0.0282221	yes
XLOC_011055	XLOC_011055	LOC_Os11g07550	expressed protein	-INF	Down Regulated	Chr11:3824514-3826132	HCR1	H48	OK	0.83218	0	#NAME?	0.0038	0.0771319	no
XLOC_011270	XLOC_011270	LOC_Os11g12390	expressed protein	-INF	Down Regulated	Chr11:6920727-6921120	HCR1	H48	OK	2.97696	0	#NAME?	0.00195	0.050937	no
XLOC_013474	XLOC_013474	LOC_Os11g13540	serpin domain containing protein, putative, expressed	-INF	Down Regulated	Chr11:7428083-7429611	HCR1	H48	OK	0.777466	0	#NAME?	0.00085	0.0291957	yes
XLOC_013502	XLOC_013502	LOC_Os11g13980	hsp20/alpha crystallin family protein, putative, expressed	-INF	Down Regulated	Chr11:7750252-7751125	HCR1	H48	OK	0.662317	0	#NAME?	0.00585	0.099416	no
XLOC_013613	XLOC_013613	LOC_Os11g16710	expressed protein	-INF	Down Regulated	Chr11:9260620-9261394	HCR1	H48	OK	0.561933	0	#NAME?	0.00385	0.0771319	no
XLOC_013679	XLOC_013679	LOC_Os11g18130	expressed protein	-INF	Down Regulated	Chr11:10204170-10205129	HCR1	H48	OK	0.480543	0	#NAME?	0.0074	0.116042	no
XLOC_011501	XLOC_011501	LOC_Os11g18610	transposon protein, putative, unclassified	-INF	Down Regulated	Chr11:10502518-10502761	HCR1	H48	OK	8.51966	0	#NAME?	0.0074	0.116042	no
XLOC_013704	XLOC_013704	LOC_Os11g18660	expressed protein	-INF	Down Regulated	Chr11:10538026-10539355	HCR1	H48	OK	0.876895	0	#NAME?	0.0007	0.0282221	yes
XLOC_011516	XLOC_011516	LOC_Os11g18919	expressed protein	-INF	Down Regulated	Chr11:10751503-10759442	HCR1	H48	OK	5.53963	0	#NAME?	5e-05	0.00429853	yes
XLOC_013727	XLOC_013727	LOC_Os11g19140	methyltransferase domain containing protein, expressed	-INF	Down Regulated	Chr11:10918120-10922255	HCR1	H48	OK	0.912173	0	#NAME?	0.0008	0.0291957	yes
XLOC_013876	XLOC_013876	LOC_Os11g23000	expressed protein	-INF	Down Regulated	Chr11:13227899-13228334	HCR1	H48	OK	5.92145	0	#NAME?	0.00045	0.0222941	yes
XLOC_011698	XLOC_011698	LOC_Os11g23930	expressed protein	-INF	Down Regulated	Chr11:13559934-13560946	HCR1	H48	OK	0.97812	0	#NAME?	0.00195	0.050937	no
XLOC_011765	XLOC_011765	LOC_Os11g25240	retrotransposon protein, putative, unclassified, expressed	-INF	Down Regulated	Chr11:14378387-14383757	HCR1	H48	OK	5.95129	0	#NAME?	5e-05	0.00429853	yes
XLOC_011824	XLOC_011824	LOC_Os11g26340	RALFL24 - Rapid ALkalinization Factor RALF family protein precursor, expressed	-INF	Down Regulated	Chr11:15075236-15075966	HCR1	H48	OK	2.61363	0	#NAME?	0.00085	0.0291957	yes
XLOC_011836	XLOC_011836	LOC_Os11g26620	expressed protein	-INF	Down Regulated	Chr11:15253375-15256955	HCR1	H48	OK	1.52842	0	#NAME?	0.0013	0.0387745	yes
XLOC_011852	XLOC_011852	LOC_Os11g27020	expressed protein	-INF	Down Regulated	Chr11:15560842-15563274	HCR1	H48	OK	1.36513	0	#NAME?	5e-05	0.00429853	yes
XLOC_014051	XLOC_014051	LOC_Os11g27550	expressed protein	-INF	Down Regulated	Chr11:15857800-15858091	HCR1	H48	OK	9.06479	0	#NAME?	0.00085	0.0291957	yes
XLOC_014114	XLOC_014114	LOC_Os11g28920	expressed protein	-INF	Down Regulated	Chr11:16736943-16737222	HCR1	H48	OK	4.01222	0	#NAME?	0.00585	0.099416	no
XLOC_012019	XLOC_012019	LOC_Os11g30400	expressed protein	-INF	Down Regulated	Chr11:17665367-17669580	HCR1	H48	OK	1.04211	0	#NAME?	0.0007	0.0282221	yes
XLOC_012109	XLOC_012109	LOC_Os11g32610	chalcone and stilbene synthases, putative, expressed	-INF	Down Regulated	Chr11:19236423-19238358	HCR1	H48	OK	1.91511	0	#NAME?	0.00085	0.0291957	yes
XLOC_014323	XLOC_014323	LOC_Os11g33134	expressed protein	-INF	Down Regulated	Chr11:19615007-19615672	HCR1	H48	OK	4.7137	0	#NAME?	5e-05	0.00429853	yes
XLOC_012259	XLOC_012259	LOC_Os11g36240	pectinesterase, putative, expressed	-INF	Down Regulated	Chr11:21335333-21337979	HCR1	H48	OK	1.4811	0	#NAME?	0.00055	0.0253173	yes
XLOC_012306	XLOC_012306	LOC_Os11g37190	allergen-related, putative, expressed	-INF	Down Regulated	Chr11:21966869-21969203	HCR1	H48	OK	2.45908	0	#NAME?	0.00195	0.050937	no
XLOC_012311	XLOC_012311	LOC_Os11g37280	LTPL68 - Protease inhibitor/seed storage/LTP family protein precursor, expressed	-INF	Down Regulated	Chr11:22016847-22018539	HCR1	H48	OK	5.73819	0	#NAME?	5e-05	0.00429853	yes
XLOC_012317	XLOC_012317	LOC_Os11g37370	expressed protein	-INF	Down Regulated	Chr11:22055064-22055457	HCR1	H48	OK	1.17975	0	#NAME?	0.0074	0.116042	no
XLOC_014578	XLOC_014578	LOC_Os11g39010	expressed protein	-INF	Down Regulated	Chr11:23225321-23226862	HCR1	H48	OK	0.783469	0	#NAME?	0.00045	0.0222941	yes
XLOC_012437	XLOC_012437	LOC_Os11g39750	expressed protein	-INF	Down Regulated	Chr11:23701887-23702451	HCR1	H48	OK	0.866803	0	#NAME?	0.00585	0.099416	no
XLOC_012557	XLOC_012557	LOC_Os11g42220	laccase precursor protein, putative, expressed	-INF	Down Regulated	Chr11:25432422-25434793	HCR1	H48	OK	0.942598	0	#NAME?	0.0001	0.00743766	yes
XLOC_012599	XLOC_012599	LOC_Os11g43030	von Willebrand factor type A domain containing protein, expressed	-INF	Down Regulated	Chr11:25944114-25948346	HCR1	H48	OK	1.48812	0	#NAME?	5e-05	0.00429853	yes
XLOC_014801	XLOC_014801	LOC_Os11g43830	pectinesterase, putative, expressed	-INF	Down Regulated	Chr11:26475499-26478045	HCR1	H48	OK	4.3939	0	#NAME?	5e-05	0.00429853	yes
XLOC_012649	XLOC_012649	LOC_Os11g44000	expressed protein	-INF	Down Regulated	Chr11:26583732-26586572	HCR1	H48	OK	0.467743	0	#NAME?	0.00585	0.099416	no
XLOC_015329	XLOC_015329	LOC_Os12g04140	CXE carboxylesterase, putative, expressed	-INF	Down Regulated	Chr12:1739761-1740849	HCR1	H48	OK	0.833338	0	#NAME?	0.00195	0.050937	no
XLOC_017410	XLOC_017410	LOC_Os12g04700	phosphatidylinositol-4-phosphate 5-kinase, putative, expressed	-INF	Down Regulated	Chr12:1989583-1994270	HCR1	H48	OK	15.8984	0	#NAME?	5e-05	0.00429853	yes
XLOC_015407	XLOC_015407	LOC_Os12g05600	hydrolase, alpha/beta fold family protein, putative, expressed	-INF	Down Regulated	Chr12:2571622-2573915	HCR1	H48	OK	2.74861	0	#NAME?	5e-05	0.00429853	yes
XLOC_015519	XLOC_015519	LOC_Os12g07840	dehydration response related protein, putative, expressed	-INF	Down Regulated	Chr12:3966719-3971412	HCR1	H48	OK	21.7533	0	#NAME?	5e-05	0.00429853	yes
XLOC_017576	XLOC_017576	LOC_Os12g08150	expressed protein	-INF	Down Regulated	Chr12:4168859-4169438	HCR1	H48	OK	2.00641	0	#NAME?	0.00195	0.050937	no
XLOC_015543	XLOC_015543	LOC_Os12g08330	retrotransposon protein, putative, unclassified, expressed	-INF	Down Regulated	Chr12:4234481-4246409	HCR1	H48	OK	1.49377	0	#NAME?	0.00165	0.0456719	yes
XLOC_017867	XLOC_017867	LOC_Os12g14320	expressed protein	-INF	Down Regulated	Chr12:8155453-8157413	HCR1	H48	OK	8.72697	0	#NAME?	0.00015	0.0100793	yes
XLOC_017948	XLOC_017948	LOC_Os12g16160	CCT motif family protein, expressed	-INF	Down Regulated	Chr12:9230154-9231342	HCR1	H48	OK	0.600313	0	#NAME?	0.00585	0.099416	no
XLOC_015996	XLOC_015996	LOC_Os12g17700	expressed protein	-INF	Down Regulated	Chr12:10139813-10140819	HCR1	H48	OK	1.29736	0	#NAME?	0.00085	0.0291957	yes
XLOC_018470	XLOC_018470	LOC_Os12g27800	retrotransposon protein, putative, unclassified, expressed	-INF	Down Regulated	Chr12:16386664-16389725	HCR1	H48	OK	0.990374	0	#NAME?	5e-05	0.00429853	yes
XLOC_016505	XLOC_016505	LOC_Os12g29590	expressed protein	-INF	Down Regulated	Chr12:17655628-17656481	HCR1	H48	OK	13.5477	0	#NAME?	0.0007	0.0282221	yes
XLOC_016511	XLOC_016511	LOC_Os12g29750	protein of unknown function DUF502 domain containing protein, expressed	-INF	Down Regulated	Chr12:17786024-17788513	HCR1	H48	OK	5.93382	0	#NAME?	5e-05	0.00429853	yes
XLOC_018568	XLOC_018568	LOC_Os12g29790	retrotransposon protein, putative, unclassified	-INF	Down Regulated	Chr12:17805520-17805817	HCR1	H48	OK	3.92854	0	#NAME?	0.00585	0.099416	no
XLOC_016518	XLOC_016518	LOC_Os12g29874	transposon protein, putative, CACTA, En/Spm sub-class, expressed	-INF	Down Regulated	Chr12:17864154-17866315	HCR1	H48	OK	0.736976	0	#NAME?	0.00195	0.050937	no
XLOC_016589	XLOC_016589	LOC_Os12g31390	expressed protein	-INF	Down Regulated	Chr12:18883740-18884366	HCR1	H48	OK	1.48301	0	#NAME?	0.0013	0.0387745	yes
XLOC_018637	XLOC_018637	LOC_Os12g31410	expressed protein	-INF	Down Regulated	Chr12:18893309-18896072	HCR1	H48	OK	11.0625	0	#NAME?	5e-05	0.00429853	yes
XLOC_016591	XLOC_016591	LOC_Os12g31430	helix-loop-helix DNA-binding domain containing protein, expressed	-INF	Down Regulated	Chr12:18903674-18904665	HCR1	H48	OK	1.32843	0	#NAME?	0.00145	0.0409502	yes
XLOC_018722	XLOC_018722	LOC_Os12g33070	myb-like DNA-binding domain containing protein, putative, expressed	-INF	Down Regulated	Chr12:19991425-19994401	HCR1	H48	OK	0.591903	0	#NAME?	0.0013	0.0387745	yes
XLOC_018881	XLOC_018881	LOC_Os12g36240	inhibitor I family protein, putative, expressed	-INF	Down Regulated	Chr12:22202838-22203440	HCR1	H48	OK	8.23058	0	#NAME?	0.00585	0.099416	no
XLOC_016891	XLOC_016891	LOC_Os12g37600	glycerol-3-phosphate acyltransferase, putative, expressed	-INF	Down Regulated	Chr12:23091635-23094141	HCR1	H48	OK	20.297	0	#NAME?	5e-05	0.00429853	yes
XLOC_016900	XLOC_016900	LOC_Os12g37750	expressed protein	-INF	Down Regulated	Chr12:23173152-23175839	HCR1	H48	OK	0.619174	0	#NAME?	0.0009	0.0305186	yes
XLOC_016934	XLOC_016934	LOC_Os12g38350	RALFL43 - Rapid ALkalinization Factor RALF family protein precursor, expressed	-INF	Down Regulated	Chr12:23399037-23677395	HCR1	H48	OK	6.45956	0	#NAME?	0.0061	0.102828	no
XLOC_018989	XLOC_018989	LOC_Os12g38820	expressed protein	-INF	Down Regulated	Chr12:23858565-23859484	HCR1	H48	OK	20.1676	0	#NAME?	0.00085	0.0291957	yes
XLOC_016973	XLOC_016973	LOC_Os12g39130	fibroin heavy chain precursor, putative, expressed	-INF	Down Regulated	Chr12:24071870-24072482	HCR1	H48	OK	1.42852	0	#NAME?	0.0023	0.0561646	no
XLOC_019182	XLOC_019182	LOC_Os12g42770	expressed protein	-INF	Down Regulated	Chr12:26583896-26585899	HCR1	H48	OK	2.55755	0	#NAME?	0.0008	0.0291957	yes

## Sheet: HCvs72
test_id	gene_id	gene	Annotation	log2(fold_change)	Regulation	locus	sample_1	sample_2	status	value_1	value_2	test_stat	p_value	q_value	significant
XLOC_038241	XLOC_038241	LOC_Os05g33150	CHIT6 - Chitinase family protein precursor, expressed	-11.9415	Down Regulated	Chr5:19445897-19447492	HCR1	H72	OK	5195.37	1.32085	-7.43446	0.0017	0.0280055	yes
XLOC_040942	XLOC_040942	LOC_Os05g40740	monocopper oxidase, putative, expressed	-9.56716	Down Regulated	Chr5:23883405-23886135	HCR1	H72	OK	607.61	0.800984	-7.40275	0.0017	0.0280055	yes
XLOC_038877	XLOC_038877	LOC_Os05g46530	invertase/pectin methylesterase inhibitor family protein, putative, expressed	-9.53923	Down Regulated	Chr5:26948389-26949834	HCR1	H72	OK	1528.9	2.05486	-5.42139	0.00925	0.0911962	no
XLOC_048977	XLOC_048977	LOC_Os07g49100	pectinesterase, putative, expressed	-9.24448	Down Regulated	Chr7:29388040-29390114	HCR1	H72	OK	406.121	0.669562	-7.25354	0.00045	0.0114285	yes
XLOC_008608	XLOC_008608	LOC_Os10g40090	expansin precursor, putative, expressed	-8.83101	Down Regulated	Chr10:21465008-21466849	HCR1	H72	OK	1196.61	2.62756	-6.88694	5e-05	0.00181962	yes		Row Labels	Count of Regulation
XLOC_001720	XLOC_001720	LOC_Os01g39970	protein kinase domain containing protein, putative, expressed	-8.73511	Down Regulated	Chr1:22538987-22542228	HCR1	H72	OK	427.56	1.00338	-7.07187	5e-05	0.00181962	yes		Down Regulated	971
XLOC_044374	XLOC_044374	LOC_Os06g08310	plasma membrane ATPase, putative, expressed	-8.68458	Down Regulated	Chr6:4025565-4030514	HCR1	H72	OK	204.879	0.497942	-7.15868	0.0012	0.0225999	yes		Up Regulated	1056
XLOC_032898	XLOC_032898	LOC_Os04g41250	armadillo/beta-catenin repeat family protein, putative, expressed	-8.0127	Down Regulated	Chr4:24471708-24479505	HCR1	H72	OK	87.5001	0.338802	-6.71548	0.001	0.01962	yes		Grand Total	2027
XLOC_010225	XLOC_010225	LOC_Os10g35930	OsPLIM2c - LIM domain protein, putative actin-binding protein and transcription factor, expressed	-7.83321	Down Regulated	Chr10:19198744-19206783	HCR1	H72	OK	446.759	1.95903	-7.71874	5e-05	0.00181962	yes
XLOC_010225	XLOC_010225	LOC_Os10g35940	folylpolyglutamate synthetase, putative, expressed	-7.83321	Down Regulated	Chr10:19198744-19206783	HCR1	H72	OK	446.759	1.95903	-7.71874	5e-05	0.00181962	yes
XLOC_028516	XLOC_028516	LOC_Os03g12180	MA3 domain containing protein, expressed	-7.62195	Down Regulated	Chr3:6392810-6395478	HCR1	H72	OK	107.289	0.544652	-6.80127	0.00025	0.00733805	yes
XLOC_039094	XLOC_039094	LOC_Os05g51230	phosphatidylinositol 3- and 4-kinase family protein, putative, expressed	-7.55964	Down Regulated	Chr5:29382084-29385449	HCR1	H72	OK	114.746	0.608217	-5.58232	0.0073	0.0751514	no
XLOC_056770	XLOC_056770	LOC_Os09g22000	hydrolase, HAD superfamily, Cof family, putative, expressed	-7.55133	Down Regulated	Chr9:13319714-13325707	HCR1	H72	OK	270.023	1.43954	-5.85135	0.00155	0.0264627	yes
XLOC_003046	XLOC_003046	LOC_Os01g66860	serine/threonine protein kinase, putative, expressed	-7.55049	Down Regulated	Chr1:38818685-38822182	HCR1	H72	OK	54.4881	0.290655	-4.87569	0.0072	0.0744067	no
XLOC_022182	XLOC_022182	LOC_Os02g01310	invertase/pectin methylesterase inhibitor family protein, putative, expressed	-7.35591	Down Regulated	Chr2:168440-169641	HCR1	H72	OK	186.364	1.13766	-6.76488	0.0095	0.0928523	no
XLOC_004363	XLOC_004363	LOC_Os01g21970	protein kinase, putative, expressed	-7.32713	Down Regulated	Chr1:12332794-12337227	HCR1	H72	OK	601.992	3.74891	-5.52477	5e-05	0.00181962	yes
XLOC_020242	XLOC_020242	LOC_Os02g17240	ATROPGEF7/ROPGEF7, putative, expressed	-7.31414	Down Regulated	Chr2:9885608-9888394	HCR1	H72	OK	186.749	1.17349	-6.62886	5e-05	0.00181962	yes
XLOC_025741	XLOC_025741	LOC_Os03g12570	expressed protein	-7.26338	Down Regulated	Chr3:6657524-6668721	HCR1	H72	OK	127.988	0.833058	-7.37369	5e-05	0.00181962	yes
XLOC_014859	XLOC_014859	LOC_Os11g45220	IWS1 homolog A, putative, expressed	-7.20414	Down Regulated	Chr11:27366724-27368303	HCR1	H72	OK	96.25	0.652736	-5.62253	0.0099	0.0953798	no
XLOC_000543	XLOC_000543	LOC_Os01g12680	C4-dicarboxylate transporter/malic acid transport protein, expressed	-7.11502	Down Regulated	Chr1:6987900-6994006	HCR1	H72	OK	58.2004	0.419849	-5.74804	0.0025	0.0365272	yes
XLOC_001025	XLOC_001025	LOC_Os01g23880	expressed protein	-7.05867	Down Regulated	Chr1:13442495-13443696	HCR1	H72	OK	392.589	2.94488	-6.70716	5e-05	0.00181962	yes
XLOC_043939	XLOC_043939	LOC_Os06g49860	methyltransferase, putative, expressed	-7.04783	Down Regulated	Chr6:30183273-30186939	HCR1	H72	OK	42.5055	0.321246	-6.22158	0.0079	0.0803773	no
XLOC_039453	XLOC_039453	LOC_Os05g07880	phospholipase D, putative, expressed	-6.9977	Down Regulated	Chr5:4255762-4260333	HCR1	H72	OK	47.5897	0.372389	-5.89195	0.0023	0.034008	yes
XLOC_005287	XLOC_005287	LOC_Os01g44430	retrotransposon protein, putative, unclassified, expressed	-6.94904	Down Regulated	Chr1:25476443-25483026	HCR1	H72	OK	29.9639	0.242509	-6.01631	0.00065	0.0139764	yes
XLOC_024178	XLOC_024178	LOC_Os02g44470	actin-depolymerizing factor, putative, expressed	-6.87957	Down Regulated	Chr2:26919907-26924556	HCR1	H72	OK	177.423	1.50678	-5.1771	0.00105	0.0204653	yes
XLOC_024178	XLOC_024178	LOC_Os02g44480	pentatricopeptide, putative, expressed	-6.87957	Down Regulated	Chr2:26919907-26924556	HCR1	H72	OK	177.423	1.50678	-5.1771	0.00105	0.0204653	yes
XLOC_055413	XLOC_055413	LOC_Os08g40990	receptor-like protein kinase 1, putative, expressed	-6.67974	Down Regulated	Chr8:25930878-25934033	HCR1	H72	OK	54.9598	0.536097	-5.85814	0.0005	0.0117595	yes
XLOC_053416	XLOC_053416	LOC_Os08g43570	beta-galactosidase precursor, putative, expressed	-6.62005	Down Regulated	Chr8:27560626-27565221	HCR1	H72	OK	69.9667	0.711308	-5.82264	0.00025	0.00733805	yes
XLOC_057340	XLOC_057340	LOC_Os09g35890	kinesin motor domain containing protein, expressed	-6.6165	Down Regulated	Chr9:20654706-20659187	HCR1	H72	OK	41.8676	0.426691	-4.47247	0.00575	0.0651322	no
XLOC_008274	XLOC_008274	LOC_Os10g33240	expressed protein	-6.61492	Down Regulated	Chr10:17437473-17441023	HCR1	H72	OK	120.145	1.22579	-6.4189	5e-05	0.00181962	yes
XLOC_031983	XLOC_031983	LOC_Os04g21340	expressed protein	-6.52307	Down Regulated	Chr4:12045402-12048695	HCR1	H72	OK	176.001	1.91371	-6.72716	5e-05	0.00181962	yes
XLOC_046972	XLOC_046972	LOC_Os07g07420	gibberellin 20 oxidase 1-B, putative, expressed	-6.42343	Down Regulated	Chr7:3702286-3705030	HCR1	H72	OK	133.455	1.55486	-5.65223	0.0002	0.00632877	yes
XLOC_040240	XLOC_040240	LOC_Os05g25550	E1-E2 ATPase domain containing protein, expressed	-6.38829	Down Regulated	Chr5:14848336-14852953	HCR1	H72	OK	39.1967	0.467931	-4.32203	0.00865	0.0862871	no
XLOC_044378	XLOC_044378	LOC_Os06g08380	1,3-beta-glucan synthase component domain containing protein, expressed	-6.36802	Down Regulated	Chr6:4066676-4084010	HCR1	H72	OK	9.93307	0.120259	-5.82572	0.0005	0.0117595	yes
XLOC_028740	XLOC_028740	LOC_Os03g16900	rab GDP dissociation inhibitor alpha, putative, expressed	-6.3591	Down Regulated	Chr3:9392252-9395747	HCR1	H72	OK	72.5936	0.88434	-5.5424	0.0005	0.0117595	yes
XLOC_051139	XLOC_051139	LOC_Os07g48910	retrotransposon protein, putative, unclassified, expressed	-6.27051	Down Regulated	Chr7:29268216-29270207	HCR1	H72	OK	150.146	1.94492	-5.92695	0.0012	0.0225999	yes
XLOC_003868	XLOC_003868	LOC_Os01g10890	CAMK_KIN1/SNF1/Nim1_like.8 - CAMK includes calcium/calmodulin depedent protein kinases, expressed	-6.23493	Down Regulated	Chr1:5809556-5811617	HCR1	H72	OK	85.8877	1.14033	-5.9387	0.0001	0.00345643	yes
XLOC_013547	XLOC_013547	LOC_Os11g14900	thiol protease SEN102 precursor, putative, expressed	-6.19856	Down Regulated	Chr11:8379341-8382036	HCR1	H72	OK	264.073	3.59561	-5.75281	0.0002	0.00632877	yes
XLOC_035211	XLOC_035211	LOC_Os04g32680	POEI20 - Pollen Ole e I allergen and extensin family protein precursor, expressed	-6.09983	Down Regulated	Chr4:19690314-19709974	HCR1	H72	OK	614.204	8.9553	-4.9684	0.0002	0.00632877	yes
XLOC_035211	XLOC_035211	LOC_Os04g32690	expressed protein	-6.09983	Down Regulated	Chr4:19690314-19709974	HCR1	H72	OK	614.204	8.9553	-4.9684	0.0002	0.00632877	yes
XLOC_002077	XLOC_002077	LOC_Os01g47400	OsMan01 - Endo-Beta-Mannanase, expressed	-6.09721	Down Regulated	Chr1:27081473-27085681	HCR1	H72	OK	77.3825	1.13032	-5.76641	0.0062	0.069066	no
XLOC_028188	XLOC_028188	LOC_Os03g04560	expressed protein	-5.98204	Down Regulated	Chr3:2125778-2129696	HCR1	H72	OK	34.8567	0.551457	-5.43087	0.0019	0.0297908	yes
XLOC_040974	XLOC_040974	LOC_Os05g41270	CAMK_CAMK_like.4 - CAMK includes calcium/calmodulin depedent protein kinases, expressed	-5.90577	Down Regulated	Chr5:24175472-24178191	HCR1	H72	OK	41.3254	0.689293	-4.8794	0.0005	0.0117595	yes
XLOC_028628	XLOC_028628	LOC_Os03g14610	HVA22, putative, expressed	-5.80054	Down Regulated	Chr3:7929008-7934471	HCR1	H72	OK	71.5153	1.28311	-4.43557	0.00335	0.0457396	yes
XLOC_022250	XLOC_022250	LOC_Os02g02560	UTP--glucose-1-phosphate uridylyltransferase, putative, expressed	-5.78144	Down Regulated	Chr2:924453-930024	HCR1	H72	OK	78.6237	1.42944	-4.20281	0.0084	0.0844194	no
XLOC_012570	XLOC_012570	LOC_Os11g42500	dirigent, putative, expressed	-5.70868	Down Regulated	Chr11:25593734-25594897	HCR1	H72	OK	204.615	3.91248	-5.82572	0.0001	0.00345643	yes
XLOC_031295	XLOC_031295	LOC_Os04g05050	pectate lyase precursor, putative, expressed	-5.70473	Down Regulated	Chr4:2480434-2485914	HCR1	H72	OK	88.0417	1.68808	-4.90993	0.0014	0.0251041	yes
XLOC_006396	XLOC_006396	LOC_Os01g68900	zinc finger, C3HC4 type family protein, expressed	-5.63415	Down Regulated	Chr1:40036037-40037490	HCR1	H72	OK	40.8512	0.822539	-4.76445	0.0011	0.0212578	yes
XLOC_053151	XLOC_053151	LOC_Os08g38170	methyladenine glycosylase, putative, expressed	-5.49925	Down Regulated	Chr8:24186669-24189469	HCR1	H72	OK	23.3686	0.516646	-5.00333	0.00445	0.0542489	no
XLOC_039535	XLOC_039535	LOC_Os05g09440	NADP-dependent malic enzyme, chloroplast precursor, putative, expressed	-5.47222	Down Regulated	Chr5:5293554-5297419	HCR1	H72	OK	79.5611	1.79225	-5.54759	5e-05	0.00181962	yes
XLOC_008295	XLOC_008295	LOC_Os10g33650	CK1_CaseinKinase_1.9 - CK1 includes the casein kinase 1 kinases, expressed	-5.43976	Down Regulated	Chr10:17735915-17744567	HCR1	H72	OK	32.3675	0.745724	-4.82253	0.0005	0.0117595	yes
XLOC_018991	XLOC_018991	LOC_Os12g38860	transposon protein, putative, unclassified, expressed	-5.36419	Down Regulated	Chr12:23885310-23889010	HCR1	H72	OK	143.568	3.48559	-5.58039	5e-05	0.00181962	yes
XLOC_035266	XLOC_035266	LOC_Os04g33710	expressed protein	-5.25034	Down Regulated	Chr4:20411175-20411922	HCR1	H72	OK	825.69	21.6924	-4.75502	5e-05	0.00181962	yes
XLOC_010352	XLOC_010352	LOC_Os10g39020	fringe-related protein, putative, expressed	-5.19044	Down Regulated	Chr10:20796324-20799413	HCR1	H72	OK	17.2076	0.471242	-4.52734	0.0055	0.0648579	no
XLOC_019476	XLOC_019476	LOC_Os02g01590	glycosyl hydrolases, putative, expressed	-5.15316	Down Regulated	Chr2:343056-354309	HCR1	H72	OK	120.881	3.39706	-4.42192	0.00655	0.0714133	no
XLOC_022090	XLOC_022090	LOC_Os02g57120	HEAT repeat family protein, putative, expressed	-5.15068	Down Regulated	Chr2:34981043-34989879	HCR1	H72	OK	6.9846	0.196623	-4.96543	0.0067	0.0714133	no
XLOC_041685	XLOC_041685	LOC_Os06g02019	cytochrome P450, putative, expressed	-5.13452	Down Regulated	Chr6:580664-586450	HCR1	H72	OK	81.2883	2.31411	-4.87318	5e-05	0.00181962	yes
XLOC_028040	XLOC_028040	LOC_Os03g01260	expansin precursor, putative, expressed	-5.12166	Down Regulated	Chr3:179153-180206	HCR1	H72	OK	59.1332	1.69848	-4.68027	0.00095	0.0188263	yes
XLOC_033499	XLOC_033499	LOC_Os04g54600	DUF617 domain containing protein, expressed	-5.08456	Down Regulated	Chr4:32464932-32466074	HCR1	H72	OK	168.249	4.95844	-4.22532	0.00165	0.0272577	yes
XLOC_015250	XLOC_015250	LOC_Os12g02340	LTPL14 - Protease inhibitor/seed storage/LTP family protein precursor, expressed	-4.93716	Down Regulated	Chr12:760918-762534	HCR1	H72	OK	666.316	21.7494	-5.34469	5e-05	0.00181962	yes
XLOC_015277	XLOC_015277	LOC_Os12g02980	nucleoside-triphosphatase, putative, expressed	-4.86165	Down Regulated	Chr12:1107304-1110538	HCR1	H72	OK	38.5168	1.3248	-4.75794	0.0005	0.0117595	yes
XLOC_005563	XLOC_005563	LOC_Os01g51060	hydrolase, putative, expressed	-4.86056	Down Regulated	Chr1:29326688-29334941	HCR1	H72	OK	49.4018	1.70047	-4.91445	0.00035	0.00933765	yes
XLOC_002598	XLOC_002598	LOC_Os01g57940	tyrosine protein kinase domain containing protein, putative, expressed	-4.80687	Down Regulated	Chr1:33494601-33496693	HCR1	H72	OK	184.607	6.59532	-5.56831	5e-05	0.00181962	yes
XLOC_056914	XLOC_056914	LOC_Os09g25490	CESA9 - cellulose synthase, expressed	-4.78648	Down Regulated	Chr9:15281267-15285910	HCR1	H72	OK	34.3188	1.24354	-4.6944	0.00145	0.0258752	yes
XLOC_033169	XLOC_033169	LOC_Os04g47320	uncharacterized mscS family protein, putative, expressed	-4.75586	Down Regulated	Chr4:28091138-28095005	HCR1	H72	OK	15.9099	0.58886	-4.12911	0.00175	0.028622	yes
XLOC_027011	XLOC_027011	LOC_Os03g42290	B3 DNA binding domain containing protein, expressed	-4.72516	Down Regulated	Chr3:23533462-23538865	HCR1	H72	OK	7.77754	0.294054	-3.91427	0.00205	0.0308511	yes
XLOC_018084	XLOC_018084	LOC_Os12g18960	integral membrane protein DUF6 containing protein, expressed	-4.70992	Down Regulated	Chr12:10996699-11004373	HCR1	H72	OK	68.927	2.63367	-4.28261	0.0003	0.00845343	yes
XLOC_023558	XLOC_023558	LOC_Os02g32060	hydrolase, NUDIX family, domain containing protein, expressed	-4.70101	Down Regulated	Chr2:18936316-18939517	HCR1	H72	OK	34.9768	1.34473	-3.94354	0.00265	0.0383401	yes
XLOC_021368	XLOC_021368	LOC_Os02g42710	C2 domain containing protein, putative, expressed	-4.66987	Down Regulated	Chr2:25684043-25687149	HCR1	H72	OK	50.9084	1.99995	-4.05617	0.00165	0.0272577	yes
XLOC_009773	XLOC_009773	LOC_Os10g25560	XI-I, putative, expressed	-4.65941	Down Regulated	Chr10:13231201-13255153	HCR1	H72	OK	11.02	0.436072	-4.38815	0.0005	0.0117595	yes
XLOC_009773	XLOC_009773	LOC_Os10g25565	myosin-Va, putative, expressed	-4.65941	Down Regulated	Chr10:13231201-13255153	HCR1	H72	OK	11.02	0.436072	-4.38815	0.0005	0.0117595	yes
XLOC_000534	XLOC_000534	LOC_Os01g12490	flavin monooxygenase, putative, expressed	-4.64808	Down Regulated	Chr1:6857031-6860962	HCR1	H72	OK	22.9085	0.913662	-4.19036	0.00175	0.028622	yes
XLOC_027172	XLOC_027172	LOC_Os03g45920	tubulin/FtsZ domain containing protein, putative, expressed	-4.63243	Down Regulated	Chr3:25942716-25946741	HCR1	H72	OK	59.8715	2.4139	-3.96755	0.0024	0.0352751	yes
XLOC_057386	XLOC_057386	LOC_Os09g36810	beta-galactosidase precursor, putative, expressed	-4.5625	Down Regulated	Chr9:21230250-21236811	HCR1	H72	OK	75.0456	3.17596	-4.35986	0.00015	0.00498098	yes
XLOC_033718	XLOC_033718	LOC_Os04g59440	chlorophyll A-B binding protein, putative, expressed	-4.52635	Down Regulated	Chr4:35337066-35338192	HCR1	H72	OK	38.3129	1.66256	-4.13953	0.0021	0.0314596	yes
XLOC_055243	XLOC_055243	LOC_Os08g37570	spotted leaf 11, putative, expressed	-4.52218	Down Regulated	Chr8:23793740-23796595	HCR1	H72	OK	13.2217	0.575406	-4.19721	0.00745	0.0765624	no
XLOC_022163	XLOC_022163	LOC_Os02g58790	cell division inhibitor, putative, expressed	-4.51967	Down Regulated	Chr2:35923872-35930631	HCR1	H72	OK	84.5782	3.68725	-4.71973	0.00015	0.00498098	yes
XLOC_022163	XLOC_022163	LOC_Os02g58800	expressed protein	-4.51967	Down Regulated	Chr2:35923872-35930631	HCR1	H72	OK	84.5782	3.68725	-4.71973	0.00015	0.00498098	yes
XLOC_057534	XLOC_057534	LOC_Os09g39930	tyrosine protein kinase domain containing protein, putative, expressed	-4.5138	Down Regulated	Chr9:22902938-22904835	HCR1	H72	OK	70.1826	3.07215	-4.80016	0.0002	0.00632877	yes
XLOC_033335	XLOC_033335	LOC_Os04g51340	pectinacetylesterase domain containing protein, expressed	-4.51299	Down Regulated	Chr4:30405473-30409396	HCR1	H72	OK	12.9383	0.566671	-4.03688	0.00375	0.0484625	yes
XLOC_038918	XLOC_038918	LOC_Os05g47700	LTPL152 - Protease inhibitor/seed storage/LTP family protein precursor, expressed	-4.50105	Down Regulated	Chr5:27330643-27331350	HCR1	H72	OK	93.9113	4.1473	-4.15512	0.002	0.0302217	yes
XLOC_006022	XLOC_006022	LOC_Os01g61390	transposon protein, putative, unclassified, expressed	-4.4385	Down Regulated	Chr1:35501849-35505052	HCR1	H72	OK	13.7393	0.633642	-4.06172	0.00315	0.0442541	yes
XLOC_016795	XLOC_016795	LOC_Os12g35690	RALFL5 - Rapid ALkalinization Factor RALF family protein precursor, expressed	-4.42105	Down Regulated	Chr12:21699857-21700997	HCR1	H72	OK	167.21	7.80534	-3.93524	0.003	0.0425304	yes
XLOC_047072	XLOC_047072	LOC_Os07g09384	expressed protein	-4.40413	Down Regulated	Chr7:4940553-4946653	HCR1	H72	OK	23.198	1.09566	-4.47143	0.00045	0.0114285	yes
XLOC_039485	XLOC_039485	LOC_Os05g08430	boron transporter protein, putative, expressed	-4.40042	Down Regulated	Chr5:4600522-4610483	HCR1	H72	OK	7.65765	0.362608	-4.01803	0.0013	0.0239944	yes
XLOC_041323	XLOC_041323	LOC_Os05g50170	ATPCME, putative, expressed	-4.37553	Down Regulated	Chr5:28745288-28751809	HCR1	H72	OK	24.042	1.15825	-3.70442	0.00305	0.0430331	yes
XLOC_042433	XLOC_042433	LOC_Os06g17450	expressed protein	-4.37514	Down Regulated	Chr6:10126747-10127412	HCR1	H72	OK	1017.43	49.0292	-4.72333	0.0001	0.00345643	yes
XLOC_038240	XLOC_038240	LOC_Os05g33140	CHIT5 - Chitinase family protein precursor, expressed	-4.33548	Down Regulated	Chr5:19435357-19436734	HCR1	H72	OK	61.3971	3.04115	-4.37203	0.0002	0.00632877	yes
XLOC_000765	XLOC_000765	LOC_Os01g17390	OsFBX5 - F-box domain containing protein, expressed	-4.28781	Down Regulated	Chr1:10003949-INF07768	HCR1	H72	OK	316.387	16.198	-4.40897	0.0003	0.00845343	yes
XLOC_003821	XLOC_003821	LOC_Os01g09880	harpin-induced protein 1 domain containing protein, expressed	-4.28769	Down Regulated	Chr1:5131470-5132918	HCR1	H72	OK	31.6575	1.6209	-3.65477	0.0012	0.0225999	yes
XLOC_039491	XLOC_039491	LOC_Os05g08540	gibberellin 3-beta-dioxygenase 2-2, putative, expressed	-4.28592	Down Regulated	Chr5:4660661-4662589	HCR1	H72	OK	35.7066	1.83045	-3.82074	0.00195	0.0302217	yes
XLOC_048101	XLOC_048101	LOC_Os07g31830	GTPase activating protein, putative, expressed	-4.28214	Down Regulated	Chr7:18911786-18914891	HCR1	H72	OK	47.0352	2.41752	-3.87535	0.00325	0.0453788	yes
XLOC_010798	XLOC_010798	LOC_Os11g02424	LTPL9 - Protease inhibitor/seed storage/LTP family protein precursor, expressed	-4.27731	Down Regulated	Chr11:722929-726974	HCR1	H72	OK	303.726	15.6633	-5.06789	5e-05	0.00181962	yes
XLOC_024864	XLOC_024864	LOC_Os02g58214	expressed protein	-4.24119	Down Regulated	Chr2:35633821-35636782	HCR1	H72	OK	9.63122	0.509281	-3.62874	0.00305	0.0430331	yes
XLOC_054645	XLOC_054645	LOC_Os08g25010	TBC domain containing protein, expressed	-4.23881	Down Regulated	Chr8:15163268-15167086	HCR1	H72	OK	28.3394	1.50101	-4.51797	0.00025	0.00733805	yes
XLOC_057391	XLOC_057391	LOC_Os09g36930	aquaporin protein, putative, expressed	-4.2383	Down Regulated	Chr9:21310128-21311548	HCR1	H72	OK	557.846	29.5569	-4.93682	5e-05	0.00181962	yes
XLOC_003379	XLOC_003379	LOC_Os01g74510	KIP1, putative, expressed	-4.20725	Down Regulated	Chr1:43154090-43158225	HCR1	H72	OK	5.42306	0.293587	-3.5396	0.00275	0.0396319	yes
XLOC_027550	XLOC_027550	LOC_Os03g53790	periplasmic beta-glucosidase precursor, putative, expressed	-4.20529	Down Regulated	Chr3:30835597-30838177	HCR1	H72	OK	23.5132	1.27465	-3.67518	0.00405	0.0502	no
XLOC_010389	XLOC_010389	LOC_Os10g39950	viral A-type inclusion protein repeat containing protein, expressed	-4.20078	Down Regulated	Chr10:21389825-21399809	HCR1	H72	OK	6.14903	0.334384	-4.28957	0.00055	0.0121349	yes
XLOC_035810	XLOC_035810	LOC_Os04g46079	ELMO/CED-12 family protein, putative, expressed	-4.1977	Down Regulated	Chr4:27300794-27317342	HCR1	H72	OK	14.2367	0.775843	-3.41924	0.00995	0.0957057	no
XLOC_035215	XLOC_035215	LOC_Os04g32800	basic proline-rich protein, putative, expressed	-4.17553	Down Regulated	Chr4:19796269-19798423	HCR1	H72	OK	24.5195	1.35692	-3.66541	0.00385	0.0484625	yes
XLOC_019829	XLOC_019829	LOC_Os02g07870	ATP synthase, putative, expressed	-4.16616	Down Regulated	Chr2:4119975-4127542	HCR1	H72	OK	21.4765	1.19626	-3.58929	0.0026	0.0377459	yes
XLOC_022735	XLOC_022735	LOC_Os02g13570	kinesin motor protein-related, putative, expressed	-4.14099	Down Regulated	Chr2:7278419-7285696	HCR1	H72	OK	15.4904	0.878013	-3.58638	0.00435	0.0532493	no
XLOC_022735	XLOC_022735	LOC_Os02g13580	kinesin motor domain containing protein, expressed	-4.14099	Down Regulated	Chr2:7278419-7285696	HCR1	H72	OK	15.4904	0.878013	-3.58638	0.00435	0.0532493	no
XLOC_010104	XLOC_010104	LOC_Os10g33250	WAX2, putative, expressed	-4.13819	Down Regulated	Chr10:17448950-17454855	HCR1	H72	OK	46.4677	2.63896	-4.49837	0.0001	0.00345643	yes
XLOC_011499	XLOC_011499	LOC_Os11g18570	cytochrome P450, putative, expressed	-4.13272	Down Regulated	Chr11:10474863-10477749	HCR1	H72	OK	60.3727	3.44166	-3.91424	0.0002	0.00632877	yes
XLOC_005964	XLOC_005964	LOC_Os01g60110	E2F-related protein, putative, expressed	-4.1281	Down Regulated	Chr1:34769116-34772371	HCR1	H72	OK	26.3542	1.50719	-3.46513	0.00615	0.0686642	no
XLOC_032730	XLOC_032730	LOC_Os04g37550	aspartic proteinase nepenthesin-2 precursor, putative, expressed	-4.12313	Down Regulated	Chr4:22347936-22349799	HCR1	H72	OK	21.2769	1.22102	-3.7529	0.00355	0.0463112	yes
XLOC_040572	XLOC_040572	LOC_Os05g32960	expressed protein	-4.0942	Down Regulated	Chr5:19311256-19313797	HCR1	H72	OK	56.4582	3.3056	-4.67005	5e-05	0.00181962	yes
XLOC_024271	XLOC_024271	LOC_Os02g46180	DUF581 domain containing protein, expressed	-4.08962	Down Regulated	Chr2:28136109-28137735	HCR1	H72	OK	69.7338	4.09584	-3.9216	0.0016	0.0270819	yes
XLOC_043471	XLOC_043471	LOC_Os06g40570	GRAM and C2 domains containing protein, putative, expressed	-4.08849	Down Regulated	Chr6:24187010-24192734	HCR1	H72	OK	3.6323	0.213513	-3.53149	0.0025	0.0365272	yes
XLOC_040515	XLOC_040515	LOC_Os05g31750	annexin, putative, expressed	-4.08728	Down Regulated	Chr5:18494330-18496597	HCR1	H72	OK	28.2227	1.66037	-4.24163	0.00055	0.0121349	yes
XLOC_040704	XLOC_040704	LOC_Os05g35570	DUF803 domain containing, putative, expressed	-4.07337	Down Regulated	Chr5:21135237-21138615	HCR1	H72	OK	14.552	0.864404	-3.59342	0.00545	0.0643709	no
XLOC_019237	XLOC_019237	LOC_Os12g44020	Ser/Thr protein phosphatase family protein, putative, expressed	-4.06187	Down Regulated	Chr12:27303879-27317404	HCR1	H72	OK	393.011	23.532	-3.67858	0.0062	0.069066	no
XLOC_019237	XLOC_019237	LOC_Os12g44030	purple acid phosphatase precursor, putative, expressed	-4.06187	Down Regulated	Chr12:27303879-27317404	HCR1	H72	OK	393.011	23.532	-3.67858	0.0062	0.069066	no
XLOC_019237	XLOC_019237	LOC_Os12g44050	purple acid phosphatase precursor, putative, expressed	-4.06187	Down Regulated	Chr12:27303879-27317404	HCR1	H72	OK	393.011	23.532	-3.67858	0.0062	0.069066	no
XLOC_061931	XLOC_061931	LOC_Os09g15790	ras-related protein, putative, expressed	-4.05428	Down Regulated	Chr9:9643528-9650588	HCR1	H72	OK	41.4461	2.49473	-3.87347	0.00055	0.0121349	yes
XLOC_061931	XLOC_061931	LOC_Os09g15800	tetratricopeptide-like helical, putative, expressed	-4.05428	Down Regulated	Chr9:9643528-9650588	HCR1	H72	OK	41.4461	2.49473	-3.87347	0.00055	0.0121349	yes
XLOC_043843	XLOC_043843	LOC_Os06g48050	expressed protein	-4.03781	Down Regulated	Chr6:29068581-29071757	HCR1	H72	OK	6.02079	0.366566	-3.90166	0.0045	0.0547232	no
XLOC_033381	XLOC_033381	LOC_Os04g52260	LTPL124 - Protease inhibitor/seed storage/LTP family protein precursor, expressed	-3.99883	Down Regulated	Chr4:31061681-31062703	HCR1	H72	OK	67.908	4.2477	-4.05135	0.0003	0.00845343	yes
XLOC_005333	XLOC_005333	LOC_Os01g45914	expressed protein	-3.99271	Down Regulated	Chr1:26087571-26088335	HCR1	H72	OK	61.8154	3.88303	-4.03503	5e-05	0.00181962	yes
XLOC_009910	XLOC_009910	LOC_Os10g28680	DUF581 domain containing protein, expressed	-3.9785	Down Regulated	Chr10:14960577-14962880	HCR1	H72	OK	10.5399	0.668636	-3.37287	0.0048	0.0576604	no
XLOC_008637	XLOC_008637	LOC_Os10g40810	GATA zinc finger domain containing protein, expressed	-3.97434	Down Regulated	Chr10:21943290-21945186	HCR1	H72	OK	13.933	0.88644	-3.25839	0.00445	0.0542489	no
XLOC_013957	XLOC_013957	LOC_Os11g25260	nucleoside-triphosphatase, putative, expressed	-3.97385	Down Regulated	Chr11:14390247-14398123	HCR1	H72	OK	19.9824	1.27174	-3.42736	0.0021	0.0314596	yes
XLOC_004175	XLOC_004175	LOC_Os01g17214	major facilitator superfamily antiporter, putative, expressed	-3.95725	Down Regulated	Chr1:9889539-9902738	HCR1	H72	OK	14.5309	0.935495	-3.34625	0.0029	0.0413904	yes
XLOC_042095	XLOC_042095	LOC_Os06g10210	expressed protein	-3.95716	Down Regulated	Chr6:5227415-5231645	HCR1	H72	OK	87.2686	5.61868	-4.89729	5e-05	0.00181962	yes
XLOC_028398	XLOC_028398	LOC_Os03g09170	ethylene-responsive transcription factor, putative, expressed	-3.93556	Down Regulated	Chr3:4780240-4781570	HCR1	H72	OK	22.2075	1.45137	-3.5188	0.00545	0.0643709	no
XLOC_008190	XLOC_008190	LOC_Os10g31040	Citrate transporter protein, putative, expressed	-3.92484	Down Regulated	Chr10:16225410-16238853	HCR1	H72	OK	55.3357	3.64343	-4.28959	0.0001	0.00345643	yes
XLOC_008263	XLOC_008263	LOC_Os10g32980	CESA7 - cellulose synthase, expressed	-3.92361	Down Regulated	Chr10:17261951-17266613	HCR1	H72	OK	55.2245	3.63921	-4.13801	0.0001	0.00345643	yes
XLOC_017080	XLOC_017080	LOC_Os12g41170	SEY1, putative, expressed	-3.91024	Down Regulated	Chr12:25508616-25516954	HCR1	H72	OK	6.12017	0.407066	-3.4695	0.006	0.0671415	no
XLOC_039345	XLOC_039345	LOC_Os05g05580	expressed protein	-3.90087	Down Regulated	Chr5:2767139-2775723	HCR1	H72	OK	7.40814	0.495943	-3.40792	0.00985	0.094929	no
XLOC_049182	XLOC_049182	LOC_Os07g04860	transposon protein, putative, unclassified, expressed	-3.89033	Down Regulated	Chr7:2139347-2144093	HCR1	H72	OK	20.5263	1.38422	-4.38803	0.0005	0.0117595	yes
XLOC_020616	XLOC_020616	LOC_Os02g25900	pollen signalling protein with adenylyl cyclase activity, putative, expressed	-3.88643	Down Regulated	Chr2:15192253-15196729	HCR1	H72	OK	117.248	7.92816	-4.25784	0.00015	0.00498098	yes
XLOC_025172	XLOC_025172	LOC_Os03g01020	pectinesterase inhibitor domain containing protein, putative, expressed	-3.88359	Down Regulated	Chr3:26525-28075	HCR1	H72	OK	54.1304	3.66744	-4.0598	0.0006	0.0131206	yes
XLOC_040856	XLOC_040856	LOC_Os05g39000	KIP1, putative, expressed	-3.86535	Down Regulated	Chr5:22878684-22882073	HCR1	H72	OK	32.7131	2.24458	-4.59847	0.00015	0.00498098	yes
XLOC_039493	XLOC_039493	LOC_Os05g08554	expressed protein	-3.848	Down Regulated	Chr5:4665263-4667919	HCR1	H72	OK	171.34	11.8986	-4.37811	0.0005	0.0117595	yes
XLOC_053216	XLOC_053216	LOC_Os08g39330	skin secretory protein xP2 precursor, putative, expressed	-3.8365	Down Regulated	Chr8:24854284-24855757	HCR1	H72	OK	36.0337	2.52237	-3.47824	0.00745	0.0765624	no
XLOC_004051	XLOC_004051	LOC_Os01g14670	Cupin domain containing protein, expressed	-3.83161	Down Regulated	Chr1:8203764-8206969	HCR1	H72	OK	190.62	13.3887	-4.32562	0.0001	0.00345643	yes
XLOC_054294	XLOC_054294	LOC_Os08g16810	retrotransposon protein, putative, SINE subclass, expressed	-3.76874	Down Regulated	Chr8:10286866-10287842	HCR1	H72	OK	54.2931	3.98328	-3.84618	0.0009	0.0179557	yes
XLOC_022549	XLOC_022549	LOC_Os02g09530	expressed protein	-3.76156	Down Regulated	Chr2:4908801-4911371	HCR1	H72	OK	66.0301	4.86854	-3.66668	0.0011	0.0212578	yes
XLOC_042933	XLOC_042933	LOC_Os06g29350	myosin, putative, expressed	-3.72646	Down Regulated	Chr6:16774132-16785410	HCR1	H72	OK	10.3275	0.780223	-4.21489	0.00035	0.00933765	yes
XLOC_033080	XLOC_033080	LOC_Os04g45290	glycosyl hydrolases, putative, expressed	-3.69956	Down Regulated	Chr4:26765198-26771893	HCR1	H72	OK	132.232	10.1779	-4.09046	5e-05	0.00181962	yes
XLOC_041253	XLOC_041253	LOC_Os05g48640	ATROPGEF7/ROPGEF7, putative, expressed	-3.6986	Down Regulated	Chr5:27880008-27882932	HCR1	H72	OK	4.92031	0.378969	-3.16067	0.00665	0.0714133	no
XLOC_044743	XLOC_044743	LOC_Os06g15620	GASR7 - Gibberellin-regulated GASA/GAST/Snakin family protein precursor, expressed	-3.68784	Down Regulated	Chr6:8847701-8848847	HCR1	H72	OK	49.0125	3.80327	-3.07455	0.0073	0.0751514	no
XLOC_037381	XLOC_037381	LOC_Os05g13860	expressed protein	-3.66987	Down Regulated	Chr5:7704926-7708006	HCR1	H72	OK	9.91779	0.779245	-2.29797	0.00905	0.0897327	no
XLOC_006639	XLOC_006639	LOC_Os01g74480	cupin domain containing protein, expressed	-3.66606	Down Regulated	Chr1:43136223-43137723	HCR1	H72	OK	105.313	8.29638	-4.4272	0.0003	0.00845343	yes
XLOC_033462	XLOC_033462	LOC_Os04g53780	leucoanthocyanidin reductase, putative, expressed	-3.64962	Down Regulated	Chr4:32048981-32052005	HCR1	H72	OK	32.3682	2.57913	-3.27668	0.00535	0.0634431	no
XLOC_022181	XLOC_022181	LOC_Os02g01300	invertase/pectin methylesterase inhibitor family protein, putative, expressed	-3.6486	Down Regulated	Chr2:165492-166232	HCR1	H72	OK	26.5587	2.11772	-2.99192	0.0053	0.0630016	no
XLOC_017109	XLOC_017109	LOC_Os12g41780	glycosyl transferase family 17 protein, putative, expressed	-3.63676	Down Regulated	Chr12:25882976-25885922	HCR1	H72	OK	10.4243	0.838059	-3.12547	0.00865	0.0862871	no
XLOC_011014	XLOC_011014	LOC_Os11g06690	serine esterase family protein, putative, expressed	-3.60869	Down Regulated	Chr11:3256398-3261353	HCR1	H72	OK	13.4277	1.10072	-3.9757	0.00085	0.0171782	yes
XLOC_016569	XLOC_016569	LOC_Os12g31000	pumilio-family RNA binding repeat domain containing protein, expressed	-3.54336	Down Regulated	Chr12:18618481-18621147	HCR1	H72	OK	24.3181	2.08579	-3.83567	0.0018	0.0292619	yes
XLOC_027806	XLOC_027806	LOC_Os03g59660	clathrin adaptor complex small chain domain containing protein, expressed	-3.54018	Down Regulated	Chr3:33969119-33971519	HCR1	H72	OK	8.66736	0.745051	-2.90345	0.0069	0.0717828	no
XLOC_003646	XLOC_003646	LOC_Os01g06580	fasciclin domain containing protein, expressed	-3.54001	Down Regulated	Chr1:3097345-3098527	HCR1	H72	OK	21.0806	1.81232	-3.11965	0.00625	0.0695706	no
XLOC_038970	XLOC_038970	LOC_Os05g48900	fasciclin domain containing protein, expressed	-3.52687	Down Regulated	Chr5:28051692-28052945	HCR1	H72	OK	96.4331	8.36628	-3.58042	0.00065	0.0139764	yes
XLOC_028604	XLOC_028604	LOC_Os03g14030	thaumatin, putative, expressed	-3.52326	Down Regulated	Chr3:7610989-7614083	HCR1	H72	OK	28.456	2.47495	-3.6375	0.00085	0.0171782	yes
XLOC_041675	XLOC_041675	LOC_Os06g01790	expressed protein	-3.52268	Down Regulated	Chr6:454855-457580	HCR1	H72	OK	12.2606	1.06679	-2.93516	0.00425	0.0521762	no
XLOC_017488	XLOC_017488	LOC_Os12g06260	harpin-induced protein 1 domain containing protein, expressed	-3.52029	Down Regulated	Chr12:2979476-2980873	HCR1	H72	OK	45.4811	3.96386	-3.652	0.0012	0.0225999	yes
XLOC_006098	XLOC_006098	LOC_Os01g62950	ras-related protein, putative, expressed	-3.51542	Down Regulated	Chr1:36467914-36470441	HCR1	H72	OK	35.5007	3.10448	-3.58709	0.002	0.0302217	yes
XLOC_014289	XLOC_014289	LOC_Os11g32490	expressed protein	-3.49096	Down Regulated	Chr11:19175148-19179728	HCR1	H72	OK	4.40157	0.391492	-3.06167	0.0075	0.076996	no
XLOC_017410	XLOC_017410	LOC_Os12g04700	phosphatidylinositol-4-phosphate 5-kinase, putative, expressed	-3.48108	Down Regulated	Chr12:1989583-1994270	HCR1	H72	OK	11.4543	1.02579	-3.63211	0.0006	0.0131206	yes
XLOC_049669	XLOC_049669	LOC_Os07g15370	metal transporter Nramp6, putative, expressed	-3.47837	Down Regulated	Chr7:8871435-8878905	HCR1	H72	OK	41.634	3.73555	-3.43749	0.002	0.0302217	yes
XLOC_003582	XLOC_003582	LOC_Os01g05080	thylakoid lumenal protein, putative, expressed	-3.47476	Down Regulated	Chr1:2383529-2385654	HCR1	H72	OK	16.904	1.52049	-3.08642	0.00815	0.0824954	no
XLOC_033737	XLOC_033737	LOC_Os04g01140	cytochrome P450 93A2, putative, expressed	-3.45909	Down Regulated	Chr4:99617-101643	HCR1	H72	OK	51.1987	4.65551	-3.4333	0.00315	0.0442541	yes
XLOC_043659	XLOC_043659	LOC_Os06g44300	WAX2, putative, expressed	-3.45611	Down Regulated	Chr6:26736602-26744116	HCR1	H72	OK	28.4415	2.59155	-3.46015	0.00165	0.0272577	yes
XLOC_060743	XLOC_060743	LOC_Os09g28600	expressed protein	-3.44536	Down Regulated	Chr9:17399883-17401188	HCR1	H72	OK	17.7934	1.63344	-3.07289	0.00875	0.0871377	no
XLOC_054190	XLOC_054190	LOC_Os08g15060	ATP binding protein, putative, expressed	-3.44068	Down Regulated	Chr8:9101237-9105746	HCR1	H72	OK	6.30869	0.581022	-2.66446	0.0074	0.0761014	no
XLOC_025228	XLOC_025228	LOC_Os03g01990	lysM domain containing protein, putative, expressed	-3.43772	Down Regulated	Chr3:621021-624074	HCR1	H72	OK	28.92	2.66895	-3.80977	0.0007	0.0148253	yes
XLOC_021261	XLOC_021261	LOC_Os02g39950	EF hand family protein, putative, expressed	-3.4345	Down Regulated	Chr2:24158476-24163116	HCR1	H72	OK	17.8062	1.64696	-3.78346	0.00225	0.0333688	yes
XLOC_044359	XLOC_044359	LOC_Os06g08090	heparanase-like protein precursor, putative, expressed	-3.4175	Down Regulated	Chr6:3924680-3927945	HCR1	H72	OK	19.2443	1.80107	-3.30852	0.0019	0.0297908	yes
XLOC_027581	XLOC_027581	LOC_Os03g55040	UDP-glucoronosyl and UDP-glucosyl transferase domain containing protein, expressed	-3.41624	Down Regulated	Chr3:31298865-31301009	HCR1	H72	OK	24.5924	2.3036	-3.44355	0.00245	0.0359386	yes
XLOC_000568	XLOC_000568	LOC_Os01g13120	aquaporin protein, putative, expressed	-3.41366	Down Regulated	Chr1:7297671-7298971	HCR1	H72	OK	27.5495	2.58523	-3.05484	0.0091	0.0900775	no
XLOC_001848	XLOC_001848	LOC_Os01g42520	expressed protein	-3.40909	Down Regulated	Chr1:24181110-24184171	HCR1	H72	OK	240.96	22.6834	-3.97419	0.0001	0.00345643	yes
XLOC_002176	XLOC_002176	LOC_Os01g49260	expressed protein	-3.40847	Down Regulated	Chr1:28319179-28321172	HCR1	H72	OK	9.02185	0.849655	-3.10527	0.0085	0.0852507	no
XLOC_027781	XLOC_027781	LOC_Os03g59210	expressed protein	-3.38608	Down Regulated	Chr3:33716750-33717617	HCR1	H72	OK	31.6789	3.03011	-3.22346	0.0054	0.0639591	no
XLOC_014520	XLOC_014520	LOC_Os11g37670	expressed protein	-3.38488	Down Regulated	Chr11:22241399-22244430	HCR1	H72	OK	20.365	1.94955	-3.47803	0.00145	0.0258752	yes
XLOC_016209	XLOC_016209	LOC_Os12g23190	tyrosine phosphatase family protein, putative, expressed	-3.38175	Down Regulated	Chr12:13110810-13114316	HCR1	H72	OK	35.9583	3.44979	-3.2289	0.0032	0.04485	yes
XLOC_012282	XLOC_012282	LOC_Os11g36740	DUF593 domain containing protein, expressed	-3.36826	Down Regulated	Chr11:21687446-21691214	HCR1	H72	OK	37.0984	3.59259	-3.79912	0.00075	0.0157266	yes
XLOC_030620	XLOC_030620	LOC_Os03g60340	leaf senescence related protein, putative, expressed	-3.35945	Down Regulated	Chr3:34311080-34314802	HCR1	H72	OK	40.6514	3.96079	-3.35104	0.0011	0.0212578	yes
XLOC_021164	XLOC_021164	LOC_Os02g38040	leucine-rich repeat family protein, putative, expressed	-3.33833	Down Regulated	Chr2:22978829-22981571	HCR1	H72	OK	43.7588	4.32643	-3.79122	0.00065	0.0139764	yes
XLOC_002869	XLOC_002869	LOC_Os01g63190	laccase precursor protein, putative, expressed	-3.33732	Down Regulated	Chr1:36622826-36627675	HCR1	H72	OK	53.5182	5.29501	-3.57025	0.00245	0.0359386	yes
XLOC_028889	XLOC_028889	LOC_Os03g20410	aquaporin SIP2-1, putative, expressed	-3.33148	Down Regulated	Chr3:11546446-11549084	HCR1	H72	OK	34.4429	3.42156	-3.53186	0.0022	0.0327916	yes
XLOC_019091	XLOC_019091	LOC_Os12g41180	LSTK-1-like kinase, putative, expressed	-3.3263	Down Regulated	Chr12:25518231-25522441	HCR1	H72	OK	19.3583	1.92997	-3.69696	0.0003	0.00845343	yes
XLOC_005691	XLOC_005691	LOC_Os01g54300	OsMan02 - Endo-Beta-Mannanase, expressed	-3.32118	Down Regulated	Chr1:31248318-31254916	HCR1	H72	OK	32.4122	3.24289	-3.91459	0.00095	0.0188263	yes
XLOC_042587	XLOC_042587	LOC_Os06g21230	glycine rich protein family protein, putative, expressed	-3.31759	Down Regulated	Chr6:12273477-12274110	HCR1	H72	OK	24.3688	2.44422	-2.74379	0.0097	0.0936664	no
XLOC_022571	XLOC_022571	LOC_Os02g09940	peroxiredoxin, putative, expressed	-3.315	Down Regulated	Chr2:5166990-5168040	HCR1	H72	OK	79.7201	8.01039	-3.74421	0.00055	0.0121349	yes
XLOC_024173	XLOC_024173	LOC_Os02g44380	WD domain containing protein, putative, expressed	-3.29243	Down Regulated	Chr2:26866478-26880508	HCR1	H72	OK	7.67799	0.783659	-3.73099	0.0004	0.0103451	yes
XLOC_041674	XLOC_041674	LOC_Os06g01780	ethylene-responsive element-binding protein, putative, expressed	-3.29017	Down Regulated	Chr6:450939-453734	HCR1	H72	OK	6.19671	0.633461	-2.84477	0.0092	0.0908546	no
XLOC_022264	XLOC_022264	LOC_Os02g02840	ras-related protein, putative, expressed	-3.28648	Down Regulated	Chr2:1080512-1084283	HCR1	H72	OK	71.4554	7.3233	-3.61799	0.00035	0.00933765	yes
XLOC_028760	XLOC_028760	LOC_Os03g17270	expressed protein	-3.2724	Down Regulated	Chr3:9619833-9628261	HCR1	H72	OK	9.24275	0.956557	-3.19079	0.0056	0.0651322	no
XLOC_008803	XLOC_008803	LOC_Os10g02260	peptide transporter PTR2, putative, expressed	-3.26913	Down Regulated	Chr10:805214-809801	HCR1	H72	OK	11.8184	1.22589	-3.22255	0.00765	0.0782644	no
XLOC_000217	XLOC_000217	LOC_Os01g05430	OsRhmbd1 - Putative Rhomboid homologue, expressed	-3.2634	Down Regulated	Chr1:2566907-2570029	HCR1	H72	OK	22.13	2.30462	-3.14074	0.0042	0.0517773	no
XLOC_007605	XLOC_007605	LOC_Os10g16974	cytochrome P450, putative, expressed	-3.24898	Down Regulated	Chr10:8494247-8504329	HCR1	H72	OK	33.0464	3.47603	-3.30473	0.00145	0.0258752	yes
XLOC_039786	XLOC_039786	LOC_Os05g15510	cellulase, putative, expressed	-3.2461	Down Regulated	Chr5:8766742-8774386	HCR1	H72	OK	10.2124	1.07635	-3.22189	0.0045	0.0547232	no
XLOC_033514	XLOC_033514	LOC_Os04g54850	pectinesterase, putative, expressed	-3.22892	Down Regulated	Chr4:32625801-32629134	HCR1	H72	OK	45.1912	4.82006	-3.78095	5e-05	0.00181962	yes
XLOC_044187	XLOC_044187	LOC_Os06g04450	Sec1 family transport protein, putative, expressed	-3.22701	Down Regulated	Chr6:1900861-1909223	HCR1	H72	OK	11.9719	1.2786	-3.59177	0.0077	0.0786399	no
XLOC_058738	XLOC_058738	LOC_Os09g26310	hypro1, putative, expressed	-3.21996	Down Regulated	Chr9:15896374-15898021	HCR1	H72	OK	17.7362	1.90352	-2.74788	0.0056	0.0651322	no
XLOC_019660	XLOC_019660	LOC_Os02g05040	cyclin-related protein, putative, expressed	-3.19535	Down Regulated	Chr2:2397425-2404976	HCR1	H72	OK	4.55016	0.496741	-3.28944	0.00645	0.071394	no
XLOC_000745	XLOC_000745	LOC_Os01g16950	zinc finger, C3HC4 type domain containing protein, expressed	-3.19407	Down Regulated	Chr1:9690234-9692180	HCR1	H72	OK	117.288	12.8157	-3.88596	0.00035	0.00933765	yes
XLOC_048511	XLOC_048511	LOC_Os07g40220	expressed protein	-3.17481	Down Regulated	Chr7:24115633-24116649	HCR1	H72	OK	36.4869	4.0404	-2.78098	0.008	0.081088	no
XLOC_004526	XLOC_004526	LOC_Os01g25820	respiratory burst oxidase, putative, expressed	-3.17353	Down Regulated	Chr1:14621294-14627937	HCR1	H72	OK	31.7499	3.51895	-4.0688	5e-05	0.00181962	yes
XLOC_053368	XLOC_053368	LOC_Os08g42640	zinc finger, C3HC4 type domain containing protein, expressed	-3.1691	Down Regulated	Chr8:26948530-26953515	HCR1	H72	OK	40.9521	4.55284	-3.79556	0.0005	0.0117595	yes
XLOC_042114	XLOC_042114	LOC_Os06g10480	expressed protein	-3.16189	Down Regulated	Chr6:5393250-5406655	HCR1	H72	OK	20.0623	2.24159	-3.68615	0.00045	0.0114285	yes
XLOC_006047	XLOC_006047	LOC_Os01g61910	KIP1, putative, expressed	-3.14018	Down Regulated	Chr1:35832416-35836375	HCR1	H72	OK	12.9133	1.4647	-3.59743	0.00075	0.0157266	yes
XLOC_037316	XLOC_037316	LOC_Os05g11950	GDSL-like lipase/acylhydrolase, putative, expressed	-3.13285	Down Regulated	Chr5:6824520-6827362	HCR1	H72	OK	43.8524	4.99934	-3.57269	0.0009	0.0179557	yes
XLOC_002581	XLOC_002581	LOC_Os01g57610	OsGH3.1 - Probable indole-3-acetic acid-amido synthetase, expressed	-3.12116	Down Regulated	Chr1:33308447-33311391	HCR1	H72	OK	23.7445	2.72897	-3.57021	0.00045	0.0114285	yes
XLOC_043675	XLOC_043675	LOC_Os06g44610	membrane associated DUF588 domain containing protein, putative, expressed	-3.1157	Down Regulated	Chr6:26937146-26941036	HCR1	H72	OK	105.489	12.1699	-3.70106	0.00055	0.0121349	yes
XLOC_027411	XLOC_027411	LOC_Os03g50960	LTPL118 - Protease inhibitor/seed storage/LTP family protein precursor, expressed	-3.0707	Down Regulated	Chr3:29110321-29111122	HCR1	H72	OK	38.754	4.61259	-2.9461	0.00875	0.0871378	no
XLOC_008257	XLOC_008257	LOC_Os10g32900	CCT motif family protein, expressed	-3.06602	Down Regulated	Chr10:17219595-17224614	HCR1	H72	OK	27.6704	3.30408	-2.89231	0.00585	0.0660122	no
XLOC_039039	XLOC_039039	LOC_Os05g50120	CGMC_MAPKCMGC_2.3 - CGMC includes CDA, MAPK, GSK3, and CLKC kinases, expressed	-3.05263	Down Regulated	Chr5:28720636-28726522	HCR1	H72	OK	28.4709	3.43137	-3.5186	0.0006	0.0131206	yes
XLOC_021686	XLOC_021686	LOC_Os02g49260	transporter-related, putative, expressed	-3.05072	Down Regulated	Chr2:30105470-30109847	HCR1	H72	OK	25.3775	3.06261	-3.32738	0.00225	0.0333688	yes
XLOC_003033	XLOC_003033	LOC_Os01g66590	DUF260 domain containing protein, putative, expressed	-3.04969	Down Regulated	Chr1:38676216-38679707	HCR1	H72	OK	7.02187	0.848017	-2.38658	0.0086	0.0859042	no
XLOC_027173	XLOC_027173	LOC_Os03g45930	expressed protein	-3.01758	Down Regulated	Chr3:25960078-25961643	HCR1	H72	OK	39.7614	4.90999	-3.05655	0.0062	0.069066	no
XLOC_011462	XLOC_011462	LOC_Os11g17600	roothairless 1, putative, expressed	-3.01668	Down Regulated	Chr11:9794780-9810269	HCR1	H72	OK	7.2338	0.893833	-2.98892	0.00425	0.0521762	no
XLOC_038448	XLOC_038448	LOC_Os05g37880	growth regulator related protein, putative, expressed	-3.01099	Down Regulated	Chr5:22184060-22189151	HCR1	H72	OK	9.23641	1.14579	-3.17079	0.00675	0.0714133	no
XLOC_002970	XLOC_002970	LOC_Os01g65210	proton-dependent oligopeptide transport, putative, expressed	-2.98032	Down Regulated	Chr1:37837079-37843664	HCR1	H72	OK	16.5897	2.10219	-3.05402	0.00385	0.0484625	yes
XLOC_040284	XLOC_040284	LOC_Os05g26660	NADH-ubiquinone oxidoreductase, mitochondrial precursor, putative, expressed	-2.97858	Down Regulated	Chr5:15482299-15488221	HCR1	H72	OK	11.3931	1.44544	-3.0528	0.00635	0.0704188	no
XLOC_012870	XLOC_012870	LOC_Os11g01340	omega-3 fatty acid desaturase, chloroplast precursor, putative, expressed	-2.96832	Down Regulated	Chr11:199732-203904	HCR1	H72	OK	12.6355	1.6145	-3.09984	0.00295	0.0419623	yes
XLOC_011074	XLOC_011074	LOC_Os11g07912	MLO domain containing protein, putative, expressed	-2.96699	Down Regulated	Chr11:4086131-4090752	HCR1	H72	OK	9.75289	1.24733	-3.04266	0.00445	0.0542489	no
XLOC_026019	XLOC_026019	LOC_Os03g18360	BTBT1 - Bric-a-Brac, Tramtrack, Broad Complex BTB domain with tetratricopeptide repeats, expressed	-2.94766	Down Regulated	Chr3:10286454-10291613	HCR1	H72	OK	26.6268	3.45132	-3.52037	0.001	0.01962	yes
XLOC_015461	XLOC_015461	LOC_Os12g06780	expressed protein	-2.94402	Down Regulated	Chr12:3293490-3295293	HCR1	H72	OK	45.9816	5.97512	-2.90812	0.0024	0.0352751	yes
XLOC_021212	XLOC_021212	LOC_Os02g38970	expressed protein	-2.93493	Down Regulated	Chr2:23544804-23549147	HCR1	H72	OK	16.152	2.11215	-3.39173	0.0015	0.026417	yes
XLOC_005746	XLOC_005746	LOC_Os01g55350	phosphoenolpyruvate carboxylase, putative, expressed	-2.92427	Down Regulated	Chr1:31859330-31865350	HCR1	H72	OK	4.16168	0.548246	-2.41477	0.00985	0.094929	no
XLOC_046356	XLOC_046356	LOC_Os06g49840	OsMADS16 - MADS-box family gene with MIKCc type-box, expressed	-2.91802	Down Regulated	Chr6:30173484-30178066	HCR1	H72	OK	298.36	39.4757	-3.60459	0.00055	0.0121349	yes
XLOC_002373	XLOC_002373	LOC_Os01g53240	BURP domain containing protein, expressed	-2.9155	Down Regulated	Chr1:30589858-30592660	HCR1	H72	OK	31.1085	4.12312	-3.30597	0.0012	0.0225999	yes
XLOC_030301	XLOC_030301	LOC_Os03g53150	OsIAA13 - Auxin-responsive Aux/IAA gene family member, expressed	-2.91438	Down Regulated	Chr3:30476503-30483331	HCR1	H72	OK	82.6542	10.9635	-2.65405	0.00715	0.0740452	no
XLOC_053306	XLOC_053306	LOC_Os08g41320	BHLH transcription factor, putative, expressed	-2.90999	Down Regulated	Chr8:26102848-26105371	HCR1	H72	OK	29.1844	3.8829	-3.11683	0.00105	0.0204653	yes
XLOC_028180	XLOC_028180	LOC_Os03g04360	inorganic phosphate transporter, putative, expressed	-2.90836	Down Regulated	Chr3:2010986-2013532	HCR1	H72	OK	11.4393	1.52368	-2.93164	0.0024	0.0352751	yes
XLOC_010284	XLOC_010284	LOC_Os10g37230	expressed protein	-2.90529	Down Regulated	Chr10:19915686-19916952	HCR1	H72	OK	60.0873	8.02052	-3.27002	0.00195	0.0302217	yes
XLOC_028360	XLOC_028360	LOC_Os03g08310	ZIM domain containing protein, putative, expressed	-2.90211	Down Regulated	Chr3:4232000-4233042	HCR1	H72	OK	44.3545	5.93355	-3.01182	0.0036	0.0468808	yes
XLOC_025559	XLOC_025559	LOC_Os03g08600	glycosyl transferase, putative, expressed	-2.89628	Down Regulated	Chr3:4428835-4434164	HCR1	H72	OK	75.1891	10.0992	-3.5686	0.00065	0.0139764	yes
XLOC_025688	XLOC_025688	LOC_Os03g11650	ATMAP70 protein, putative, expressed	-2.89524	Down Regulated	Chr3:6075461-6084525	HCR1	H72	OK	28.6952	3.85706	-3.23648	0.00255	0.0371294	yes
XLOC_025625	XLOC_025625	LOC_Os03g10390	expressed protein	-2.88469	Down Regulated	Chr3:5294486-5297025	HCR1	H72	OK	21.5111	2.91262	-2.70676	0.00305	0.0430331	yes
XLOC_035491	XLOC_035491	LOC_Os04g39489	amino acid transporter, putative, expressed	-2.86062	Down Regulated	Chr4:23512377-23523269	HCR1	H72	OK	68.1496	9.38275	-2.57286	0.00535	0.0634431	no
XLOC_049400	XLOC_049400	LOC_Os07g09800	expressed protein	-2.8553	Down Regulated	Chr7:5216003-5217096	HCR1	H72	OK	20.0495	2.7706	-2.836	0.00295	0.0419623	yes
XLOC_030411	XLOC_030411	LOC_Os03g56060	CSLC9 - cellulose synthase-like family C, expressed	-2.84241	Down Regulated	Chr3:31930540-31934688	HCR1	H72	OK	30.9935	4.32136	-3.08233	0.00055	0.0121349	yes
XLOC_005137	XLOC_005137	LOC_Os01g41140	THION18 - Plant thionin family protein precursor, expressed	-2.82693	Down Regulated	Chr1:23291658-23292667	HCR1	H72	OK	367.922	51.852	-3.54692	5e-05	0.00181962	yes
XLOC_028636	XLOC_028636	LOC_Os03g14730	gibberellin receptor GID1L2, putative, expressed	-2.81305	Down Regulated	Chr3:8010853-8012571	HCR1	H72	OK	19.8834	2.82929	-2.9127	0.0067	0.0714133	no
XLOC_037401	XLOC_037401	LOC_Os05g14180	OsIAA17 - Auxin-responsive Aux/IAA gene family member, expressed	-2.80659	Down Regulated	Chr5:7950871-7954386	HCR1	H72	OK	391.211	55.9171	-2.85769	0.00385	0.0484625	yes
XLOC_006636	XLOC_006636	LOC_Os01g74450	aquaporin protein, putative, expressed	-2.80478	Down Regulated	Chr1:43115741-43117231	HCR1	H72	OK	77.827	11.138	-3.39942	0.00085	0.0171782	yes
XLOC_008457	XLOC_008457	LOC_Os10g37180	glycine cleavage system H protein, putative, expressed	-2.7823	Down Regulated	Chr10:19894707-19896859	HCR1	H72	OK	165.84	24.1064	-3.38631	0.0012	0.0225999	yes
XLOC_060779	XLOC_060779	LOC_Os09g29390	plastocyanin-like domain containing protein, putative, expressed	-2.78018	Down Regulated	Chr9:17843406-17844736	HCR1	H72	OK	28.3714	4.13013	-2.86748	0.0076	0.0778336	no
XLOC_036119	XLOC_036119	LOC_Os04g52310	metal cation transporter, putative, expressed	-2.76072	Down Regulated	Chr4:31078199-31080558	HCR1	H72	OK	18.6213	2.74758	-2.99755	0.00755	0.0774556	no
XLOC_016906	XLOC_016906	LOC_Os12g37840	boron transporter protein, putative, expressed	-2.75603	Down Regulated	Chr12:23248823-23253345	HCR1	H72	OK	96.9279	14.3483	-2.75005	0.0026	0.0377459	yes
XLOC_026255	XLOC_026255	LOC_Os03g23030	aberrant pollen transmission 1, putative, expressed	-2.75428	Down Regulated	Chr3:13293877-13309736	HCR1	H72	OK	16.5062	2.4464	-2.20154	0.0058	0.0655981	no
XLOC_013534	XLOC_013534	LOC_Os11g14570	expressed protein	-2.75172	Down Regulated	Chr11:8198056-8202005	HCR1	H72	OK	37.1183	5.51108	-2.42033	0.0041	0.0507347	no
XLOC_008633	XLOC_008633	LOC_Os10g40730	expansin precursor, putative, expressed	-2.74755	Down Regulated	Chr10:21858749-21861307	HCR1	H72	OK	139.334	20.7474	-3.0639	0.0018	0.0292619	yes
XLOC_027764	XLOC_027764	LOC_Os03g58940	LTPL83 - Protease inhibitor/seed storage/LTP family protein precursor, putative, expressed	-2.74434	Down Regulated	Chr3:33563701-33566773	HCR1	H72	OK	38.2104	5.70235	-3.14964	0.00205	0.0308511	yes
XLOC_057195	XLOC_057195	LOC_Os09g31080	induced stolen tip protein TUB8, putative, expressed	-2.7296	Down Regulated	Chr9:18685678-18686940	HCR1	H72	OK	1194.24	180.053	-2.82531	0.00235	0.0346435	yes
XLOC_034962	XLOC_034962	LOC_Os04g26834	eukaryotic aspartyl protease domain containing protein, expressed	-2.72491	Down Regulated	Chr4:15844552-15853785	HCR1	H72	OK	30.8498	4.6663	-3.33834	0.00085	0.0171782	yes
XLOC_022689	XLOC_022689	LOC_Os02g12660	protein kinase domain containing protein, putative, expressed	-2.71764	Down Regulated	Chr2:6608047-6614250	HCR1	H72	OK	27.5127	4.18256	-2.8044	0.0095	0.0928523	no
XLOC_036330	XLOC_036330	LOC_Os04g56400	glutamine synthetase, catalytic domain containing protein, expressed	-2.71319	Down Regulated	Chr4:33624331-33631095	HCR1	H72	OK	128.959	19.6653	-3.23989	0.00075	0.0157266	yes
XLOC_010319	XLOC_010319	LOC_Os10g38080	OsSub61 - Putative Subtilisin homologue, expressed	-2.70389	Down Regulated	Chr10:20389638-20392319	HCR1	H72	OK	48.5956	7.45842	-3.14048	0.00365	0.0474693	yes
XLOC_035791	XLOC_035791	LOC_Os04g45720	aldehyde dehydrogenase, putative, expressed	-2.70385	Down Regulated	Chr4:27043961-27048900	HCR1	H72	OK	23.6783	3.63421	-2.83055	0.0069	0.0717828	no
XLOC_003054	XLOC_003054	LOC_Os01g67090	IQ calmodulin-binding motif domain containing protein, expressed	-2.70258	Down Regulated	Chr1:38943036-38950827	HCR1	H72	OK	21.7753	3.34507	-3.10627	0.00865	0.0862871	no
XLOC_025807	XLOC_025807	LOC_Os03g14040	expressed protein	-2.70004	Down Regulated	Chr3:7615917-7619900	HCR1	H72	OK	29.3164	4.51148	-2.85964	0.00725	0.0748189	no
XLOC_002689	XLOC_002689	LOC_Os01g59530	OsCML1 - Calmodulin-related calcium sensor protein, expressed	-2.69999	Down Regulated	Chr1:34420989-34423678	HCR1	H72	OK	79.3258	12.2077	-3.34854	0.0002	0.00632877	yes
XLOC_030232	XLOC_030232	LOC_Os03g51620	DUF221 domain containing protein, expressed	-2.69813	Down Regulated	Chr3:29543828-29550120	HCR1	H72	OK	13.2286	2.03843	-2.86371	0.00185	0.0294279	yes
XLOC_012025	XLOC_012025	LOC_Os11g30500	HVA22, putative, expressed	-2.69623	Down Regulated	Chr11:17729024-17730347	HCR1	H72	OK	26.2528	4.05069	-2.74533	0.00835	0.0840311	no
XLOC_047000	XLOC_047000	LOC_Os07g08000	expressed protein	-2.69392	Down Regulated	Chr7:4049706-4054523	HCR1	H72	OK	6.29954	0.973552	-2.8856	0.00695	0.0722268	no
XLOC_015234	XLOC_015234	LOC_Os12g02080	peroxidase precursor, putative, expressed	-2.68217	Down Regulated	Chr12:623548-626113	HCR1	H72	OK	27.8227	4.33496	-2.9338	0.00495	0.0592698	no
XLOC_055537	XLOC_055537	LOC_Os08g43400	kinesin motor domain containing protein, expressed	-2.6781	Down Regulated	Chr8:27435125-27442742	HCR1	H72	OK	6.67228	1.04252	-2.48689	0.00995	0.0957057	no
XLOC_039199	XLOC_039199	LOC_Os05g02530	glutathione S-transferase, N-terminal domain containing protein, expressed	-2.67775	Down Regulated	Chr5:876949-880628	HCR1	H72	OK	256.5	40.0871	-2.79649	0.00175	0.028622	yes
XLOC_045680	XLOC_045680	LOC_Os06g36090	ABC-2 type transporter, putative, expressed	-2.6486	Down Regulated	Chr6:21113184-21126486	HCR1	H72	OK	16.9028	2.69558	-3.15045	0.00075	0.0157266	yes
XLOC_030151	XLOC_030151	LOC_Os03g49600	Os3bglu7 - beta-glucosidase, exo-beta-glucanse, expressed	-2.63894	Down Regulated	Chr3:28240284-28245347	HCR1	H72	OK	71.8342	11.5327	-3.33594	0.00045	0.0114285	yes
XLOC_036944	XLOC_036944	LOC_Os05g03610	phospholipase C, putative, expressed	-2.62767	Down Regulated	Chr5:1535707-1541571	HCR1	H72	OK	17.8083	2.88148	-2.87629	0.00375	0.0484625	yes
XLOC_023576	XLOC_023576	LOC_Os02g32504	heparan-alpha-glucosaminide N-acetyltransferase, putative, expressed	-2.62726	Down Regulated	Chr2:19225373-19235632	HCR1	H72	OK	18.0609	2.92318	-3.0412	0.0035	0.0457396	yes
XLOC_037737	XLOC_037737	LOC_Os05g21180	phosphatidic acid phosphatase-related, putative, expressed	-2.62665	Down Regulated	Chr5:12453242-12457829	HCR1	H72	OK	44.6163	7.22424	-3.36998	0.0011	0.0212578	yes
XLOC_056689	XLOC_056689	LOC_Os09g20240	DUF581 domain containing protein, expressed	-2.62647	Down Regulated	Chr9:12126817-12128189	HCR1	H72	OK	18.5507	3.00411	-2.69557	0.00725	0.0748189	no
XLOC_001968	XLOC_001968	LOC_Os01g45274	carbonic anhydrase, chloroplast precursor, putative, expressed	-2.6232	Down Regulated	Chr1:25692716-25705090	HCR1	H72	OK	503.975	81.7989	-3.12663	0.00425	0.0521762	no
XLOC_021673	XLOC_021673	LOC_Os02g48900	aspartic proteinase nepenthesin-1 precursor, putative, expressed	-2.61601	Down Regulated	Chr2:29911309-29916317	HCR1	H72	OK	55.3904	9.03517	-3.2855	0.0004	0.0103451	yes
XLOC_000160	XLOC_000160	LOC_Os01g04350	hsp20/alpha crystallin family protein, putative, expressed	-2.61235	Down Regulated	Chr1:1941002-1941953	HCR1	H72	OK	149.181	24.3959	-3.3567	0.0009	0.0179557	yes
XLOC_024385	XLOC_024385	LOC_Os02g48370	ARID/BRIGHT DNA-binding domain-containing protein, putative, expressed	-2.60661	Down Regulated	Chr2:29611155-29616291	HCR1	H72	OK	11.6676	1.91564	-2.83503	0.0025	0.0365272	yes
XLOC_036982	XLOC_036982	LOC_Os05g04380	peroxidase precursor, putative, expressed	-2.60159	Down Regulated	Chr5:2010114-2015088	HCR1	H72	OK	65.1454	10.7331	-2.71948	0.0051	0.0608688	no
XLOC_055329	XLOC_055329	LOC_Os08g39550	polygalacturonase inhibitor 2 precursor, putative, expressed	-2.5988	Down Regulated	Chr8:25015690-25017363	HCR1	H72	OK	34.3265	5.66648	-2.8047	0.00885	0.0880151	no
XLOC_046259	XLOC_046259	LOC_Os06g47800	disease resistance protein RGA3, putative, expressed	-2.5984	Down Regulated	Chr6:28926194-28930077	HCR1	H72	OK	15.118	2.49631	-2.89329	0.0029	0.0413904	yes
XLOC_011585	XLOC_011585	LOC_Os11g20170	expressed protein	-2.59773	Down Regulated	Chr11:11661224-11662698	HCR1	H72	OK	11.0483	1.82516	-2.53093	0.0063	0.0700481	no
XLOC_019826	XLOC_019826	LOC_Os02g07820	DUF581 domain containing protein, expressed	-2.59634	Down Regulated	Chr2:4091116-4102506	HCR1	H72	OK	40.9151	6.76562	-2.9421	0.00455	0.0551499	no
XLOC_021966	XLOC_021966	LOC_Os02g54890	UDP-glucuronate 4-epimerase, putative, expressed	-2.5959	Down Regulated	Chr2:33618240-33620330	HCR1	H72	OK	63.4895	10.5017	-3.35032	0.001	0.01962	yes
XLOC_041786	XLOC_041786	LOC_Os06g03970	receptor-like protein kinase 5 precursor, putative, expressed	-2.59141	Down Regulated	Chr6:1605205-1612409	HCR1	H72	OK	6.83	1.13326	-2.90344	0.00205	0.0308511	yes
XLOC_036070	XLOC_036070	LOC_Os04g51330	maltose excess protein 1-like, chloroplast precursor, putative, expressed	-2.59032	Down Regulated	Chr4:30395911-30402013	HCR1	H72	OK	49.0579	8.14602	-2.91303	0.00585	0.0660122	no
XLOC_017212	XLOC_017212	LOC_Os12g44150	plasma membrane ATPase, putative, expressed	-2.59002	Down Regulated	Chr12:27386952-27394090	HCR1	H72	OK	44.3544	7.36653	-3.01471	0.0016	0.0270819	yes
XLOC_015620	XLOC_015620	LOC_Os12g10184	pentatricopeptide, putative, expressed	-2.58619	Down Regulated	Chr12:5384916-5391708	HCR1	H72	OK	16.3339	2.71999	-2.89643	0.00415	0.0512891	no
XLOC_015620	XLOC_015620	LOC_Os12g10190	transposon protein, putative, unclassified, expressed	-2.58619	Down Regulated	Chr12:5384916-5391708	HCR1	H72	OK	16.3339	2.71999	-2.89643	0.00415	0.0512891	no
XLOC_044252	XLOC_044252	LOC_Os06g05730	expressed protein	-2.58444	Down Regulated	Chr6:2587925-2592267	HCR1	H72	OK	62.6752	10.4497	-3.08931	0.0012	0.0225999	yes
XLOC_044252	XLOC_044252	LOC_Os06g05740	expressed protein	-2.58444	Down Regulated	Chr6:2587925-2592267	HCR1	H72	OK	62.6752	10.4497	-3.08931	0.0012	0.0225999	yes
XLOC_021920	XLOC_021920	LOC_Os02g53990	cyclin-related protein, putative, expressed	-2.58054	Down Regulated	Chr2:33054136-33066629	HCR1	H72	OK	9.16155	1.53161	-2.95585	0.00265	0.0383401	yes
XLOC_032780	XLOC_032780	LOC_Os04g38600	glyceraldehyde-3-phosphate dehydrogenase, putative, expressed	-2.57908	Down Regulated	Chr4:22937055-22939073	HCR1	H72	OK	283.001	47.3596	-2.92516	0.0013	0.0239944	yes
XLOC_053304	XLOC_053304	LOC_Os08g41290	AIR12, putative, expressed	-2.57539	Down Regulated	Chr8:26086541-26087834	HCR1	H72	OK	21.5672	3.61846	-2.55417	0.0079	0.0803773	no
XLOC_029214	XLOC_029214	LOC_Os03g27990	STRUBBELIG-RECEPTOR FAMILY 7 precursor, putative, expressed	-2.56988	Down Regulated	Chr3:16072831-16078897	HCR1	H72	OK	16.9327	2.85177	-3.11865	0.0017	0.0280055	yes
XLOC_014882	XLOC_014882	LOC_Os11g45710	Os11bglu36 SFR2 homologue, expressed	-2.55726	Down Regulated	Chr11:27648701-27655231	HCR1	H72	OK	12.4959	2.12303	-2.79254	0.0048	0.0576604	no
XLOC_058847	XLOC_058847	LOC_Os09g28690	gibberellin receptor GID1L2, putative, expressed	-2.5549	Down Regulated	Chr9:17447932-17449592	HCR1	H72	OK	47.8358	8.14049	-2.87852	0.00455	0.0551499	no
XLOC_047956	XLOC_047956	LOC_Os07g28930	expressed protein	-2.55128	Down Regulated	Chr7:16965122-16969964	HCR1	H72	OK	10.7088	1.82695	-2.94416	0.00275	0.0396319	yes
XLOC_004996	XLOC_004996	LOC_Os01g37950	expressed protein	-2.53603	Down Regulated	Chr1:21261806-21262421	HCR1	H72	OK	95.3184	16.4345	-2.75144	0.0086	0.0859042	no
XLOC_035407	XLOC_035407	LOC_Os04g38026	transporter family protein, putative, expressed	-2.53474	Down Regulated	Chr4:22626438-22633619	HCR1	H72	OK	47.5307	8.20242	-3.27817	0.00135	0.0246103	yes
XLOC_006374	XLOC_006374	LOC_Os01g68500	expressed protein	-2.53243	Down Regulated	Chr1:39801461-39802517	HCR1	H72	OK	63.5882	10.9911	-2.92759	0.00425	0.0521762	no
XLOC_014142	XLOC_014142	LOC_Os11g29520	NBS-LRR disease resistance protein, putative, expressed	-2.52659	Down Regulated	Chr11:17126468-17133284	HCR1	H72	OK	1.81321	0.314678	-2.54519	0.00795	0.0807195	no
XLOC_010430	XLOC_010430	LOC_Os10g40720	expansin precursor, putative, expressed	-2.52214	Down Regulated	Chr10:21847803-21849726	HCR1	H72	OK	47.4525	8.26075	-2.79298	0.00525	0.0625077	no
XLOC_006275	XLOC_006275	LOC_Os01g66610	serine/threonine-protein kinase receptor precursor, putative, expressed	-2.51924	Down Regulated	Chr1:38688209-38692621	HCR1	H72	OK	26.0065	4.53645	-2.89036	0.0032	0.04485	yes
XLOC_020148	XLOC_020148	LOC_Os02g15594	protein phosphatase 2C, putative, expressed	-2.51159	Down Regulated	Chr2:8760001-8766268	HCR1	H72	OK	51.9476	9.10966	-3.06573	0.00195	0.0302217	yes
XLOC_035275	XLOC_035275	LOC_Os04g33990	harpin-induced protein 1 domain containing protein, expressed	-2.50793	Down Regulated	Chr4:20579348-20580533	HCR1	H72	OK	94.5299	16.6191	-3.03243	0.00155	0.0264627	yes
XLOC_020156	XLOC_020156	LOC_Os02g15750	expressed protein	-2.50275	Down Regulated	Chr2:8873031-8876441	HCR1	H72	OK	58.7461	10.3652	-3.18499	0.00165	0.0272577	yes
XLOC_040815	XLOC_040815	LOC_Os05g38290	protein phosphatase 2C, putative, expressed	-2.49969	Down Regulated	Chr5:22450675-22452794	HCR1	H72	OK	45.6915	8.07894	-2.99987	0.0021	0.0314596	yes
XLOC_036916	XLOC_036916	LOC_Os05g03174	glycosyltransferase family 43 protein, putative, expressed	-2.49888	Down Regulated	Chr5:1278890-1285604	HCR1	H72	OK	21.0914	3.73137	-2.43461	0.0073	0.0751514	no
XLOC_042454	XLOC_042454	LOC_Os06g17890	expressed protein	-2.48497	Down Regulated	Chr6:10381901-10390723	HCR1	H72	OK	7.68888	1.37345	-2.65191	0.0082	0.0828881	no
XLOC_042454	XLOC_042454	LOC_Os06g17900	disease resistance protein RPM1, putative, expressed	-2.48497	Down Regulated	Chr6:10381901-10390723	HCR1	H72	OK	7.68888	1.37345	-2.65191	0.0082	0.0828881	no
XLOC_003756	XLOC_003756	LOC_Os01g08540	DNA mismatch repair protein MSH6-2, putative, expressed	-2.47509	Down Regulated	Chr1:4234513-4244531	HCR1	H72	OK	3.75796	0.675889	-2.43107	0.00855	0.0855202	no
XLOC_021824	XLOC_021824	LOC_Os02g51760	expressed protein	-2.47217	Down Regulated	Chr2:31703761-31707395	HCR1	H72	OK	20.8607	3.75952	-2.4416	0.00675	0.0714133	no
XLOC_026009	XLOC_026009	LOC_Os03g18140	expressed protein	-2.46964	Down Regulated	Chr3:10147976-10153118	HCR1	H72	OK	20.7482	3.7458	-2.7405	0.00305	0.0430331	yes
XLOC_027445	XLOC_027445	LOC_Os03g51580	helix-loop-helix DNA-binding domain containing protein, expressed	-2.46794	Down Regulated	Chr3:29516645-29519095	HCR1	H72	OK	19.8536	3.58851	-2.78126	0.00495	0.0592698	no
XLOC_015759	XLOC_015759	LOC_Os12g12934	peptide transporter PTR3-A, putative, expressed	-2.45893	Down Regulated	Chr12:7165804-7171026	HCR1	H72	OK	23.6872	4.30827	-2.76081	0.00605	0.0676754	no
XLOC_036397	XLOC_036397	LOC_Os04g57610	auxin response factor, putative, expressed	-2.44976	Down Regulated	Chr4:34278411-34285905	HCR1	H72	OK	43.1911	7.90576	-3.05052	0.0007	0.0148253	yes
XLOC_033692	XLOC_033692	LOC_Os04g58800	ubiquitin-conjugating enzyme, putative, expressed	-2.43407	Down Regulated	Chr4:34975645-34977779	HCR1	H72	OK	81.2655	15.0376	-3.04398	0.0015	0.026417	yes
XLOC_043900	XLOC_043900	LOC_Os06g49160	thylakoid lumenal 16.5 kDa protein, chloroplast precursor, putative, expressed	-2.43206	Down Regulated	Chr6:29789097-29790712	HCR1	H72	OK	42.8668	7.94326	-3.01046	0.0034	0.0457396	yes
XLOC_051612	XLOC_051612	LOC_Os08g06530	rubredoxin family protein, putative, expressed	-2.42248	Down Regulated	Chr8:3694231-3696648	HCR1	H72	OK	84.2193	15.7099	-2.51347	0.00665	0.0714133	no
XLOC_000065	XLOC_000065	LOC_Os01g02150	sulfated surface glycoprotein 185 precursor, putative, expressed	-2.41708	Down Regulated	Chr1:625975-627024	HCR1	H72	OK	120.861	22.6293	-2.90746	0.0027	0.0390063	yes
XLOC_024357	XLOC_024357	LOC_Os02g47880	tetratricopeptide repeat domain containing protein, expressed	-2.41678	Down Regulated	Chr2:29287704-29291634	HCR1	H72	OK	21.0334	3.93901	-2.82278	0.00175	0.028622	yes
XLOC_040898	XLOC_040898	LOC_Os05g39990	expansin precursor, putative, expressed	-2.40652	Down Regulated	Chr5:23495605-23497572	HCR1	H72	OK	110.813	20.9004	-2.9018	0.0027	0.0390063	yes
XLOC_055216	XLOC_055216	LOC_Os08g37040	gibberellin receptor GID1L2, putative, expressed	-2.40266	Down Regulated	Chr8:23411544-23412899	HCR1	H72	OK	25.5786	4.83733	-2.26669	0.0083	0.0835563	no
XLOC_008438	XLOC_008438	LOC_Os10g36650	actin, putative, expressed	-2.40139	Down Regulated	Chr10:19606850-19610882	HCR1	H72	OK	35.8732	6.79015	-2.48448	0.0068	0.0714133	no
XLOC_040090	XLOC_040090	LOC_Os05g22614	PTAC16, putative, expressed	-2.39883	Down Regulated	Chr5:12833458-12839420	HCR1	H72	OK	63.8083	12.0992	-3.0566	0.00115	0.0219092	yes
XLOC_046226	XLOC_046226	LOC_Os06g47220	expressed protein	-2.37328	Down Regulated	Chr6:28629100-28629909	HCR1	H72	OK	85.0487	16.4149	-2.8915	0.0028	0.040274	yes
XLOC_019078	XLOC_019078	LOC_Os12g40890	OsIAA30 - Auxin-responsive Aux/IAA gene family member, expressed	-2.37122	Down Regulated	Chr12:25310811-25316229	HCR1	H72	OK	29.465	5.69504	-2.89863	0.0022	0.0327916	yes
XLOC_034402	XLOC_034402	LOC_Os04g14690	flavin-containing monooxygenase family protein, putative, expressed	-2.36908	Down Regulated	Chr4:8243686-8269025	HCR1	H72	OK	46.2794	8.95824	-3.06268	0.00185	0.0294279	yes
XLOC_034402	XLOC_034402	LOC_Os04g14710	flavin-containing monooxygenase family protein, putative, expressed	-2.36908	Down Regulated	Chr4:8243686-8269025	HCR1	H72	OK	46.2794	8.95824	-3.06268	0.00185	0.0294279	yes
XLOC_000867	XLOC_000867	LOC_Os01g20110	expressed protein	-2.36837	Down Regulated	Chr1:11412130-11421047	HCR1	H72	OK	21.2666	4.11859	-2.91443	0.00225	0.0333688	yes
XLOC_025840	XLOC_025840	LOC_Os03g14690	vacuolar ATP synthase 98 kDa subunit, putative, expressed	-2.36064	Down Regulated	Chr3:7982395-7989437	HCR1	H72	OK	21.9953	4.28258	-3.04965	0.00145	0.0258752	yes
XLOC_050856	XLOC_050856	LOC_Os07g42420	3-oxoacyl-synthase, putative, expressed	-2.36007	Down Regulated	Chr7:25392942-25398603	HCR1	H72	OK	25.7072	5.0073	-2.47618	0.00635	0.0704188	no
XLOC_053836	XLOC_053836	LOC_Os08g07490	expressed protein	-2.35871	Down Regulated	Chr8:4206323-4208054	HCR1	H72	OK	42.223	8.23201	-2.6577	0.0075	0.076996	no
XLOC_010368	XLOC_010368	LOC_Os10g39460	selenium-binding protein-like, putative, expressed	-2.35584	Down Regulated	Chr10:21058116-21061380	HCR1	H72	OK	11.4915	2.2449	-2.68426	0.0078	0.079524	no
XLOC_001631	XLOC_001631	LOC_Os01g38229	peptidyl-prolyl isomerase, putative, expressed	-2.35103	Down Regulated	Chr1:21414994-21441447	HCR1	H72	OK	8.61907	1.68939	-2.5387	0.00915	0.0904514	no
XLOC_040988	XLOC_040988	LOC_Os05g41640	phosphoglycerate kinase protein, putative, expressed	-2.34585	Down Regulated	Chr5:24378360-24381762	HCR1	H72	OK	159.264	31.329	-2.85709	0.0012	0.0225999	yes
XLOC_038262	XLOC_038262	LOC_Os05g33580	expressed protein	-2.34347	Down Regulated	Chr5:19739905-19740805	HCR1	H72	OK	191.799	37.7913	-2.62764	0.0044	0.0537723	no
XLOC_032581	XLOC_032581	LOC_Os04g33740	glycosyl hydrolases, putative, expressed	-2.32085	Down Regulated	Chr4:20422170-20427062	HCR1	H72	OK	32.9309	6.59111	-2.87066	0.0029	0.0413904	yes
XLOC_039395	XLOC_039395	LOC_Os05g06780	LTPL104 - Protease inhibitor/seed storage/LTP family protein precursor, expressed	-2.31856	Down Regulated	Chr5:3539562-3540972	HCR1	H72	OK	224.742	45.0535	-2.59039	0.00715	0.0740452	no
XLOC_002956	XLOC_002956	LOC_Os01g64960	chlorophyll A-B binding protein, putative, expressed	-2.31174	Down Regulated	Chr1:37696777-37699752	HCR1	H72	OK	143.645	28.9326	-2.78532	0.0025	0.0365272	yes
XLOC_028595	XLOC_028595	LOC_Os03g13870	expressed protein	-2.30941	Down Regulated	Chr3:7519734-7521478	HCR1	H72	OK	26.5403	5.35432	-2.56488	0.00595	0.066784	no
XLOC_044867	XLOC_044867	LOC_Os06g18670	anthocyanidin 3-O-glucosyltransferase, putative, expressed	-2.30563	Down Regulated	Chr6:10588144-10589939	HCR1	H72	OK	41.4107	8.37623	-2.64453	0.0077	0.0786399	no
XLOC_006245	XLOC_006245	LOC_Os01g66030	OsMADS2 - MADS-box family gene with MIKCc type-box, expressed	-2.30351	Down Regulated	Chr1:38319059-38324202	HCR1	H72	OK	72.7696	14.7409	-2.80006	0.00185	0.0294279	yes
XLOC_022083	XLOC_022083	LOC_Os02g57010	RNA recognition motif containing protein, putative, expressed	-2.29977	Down Regulated	Chr2:34922500-34924811	HCR1	H72	OK	43.6503	8.86518	-2.76865	0.00455	0.0551499	no
XLOC_034723	XLOC_034723	LOC_Os04g21710	expressed protein	-2.28822	Down Regulated	Chr4:12279146-12281637	HCR1	H72	OK	119.454	24.4557	-2.73238	0.0052	0.0619623	no
XLOC_030208	XLOC_030208	LOC_Os03g51010	hydrolase, alpha/beta fold family domain containing protein, expressed	-2.2821	Down Regulated	Chr3:29150119-29153687	HCR1	H72	OK	117.604	24.1792	-2.93547	0.0018	0.0292619	yes
XLOC_022312	XLOC_022312	LOC_Os02g03960	CPuORF1 - conserved peptide uORF-containing transcript, expressed	-2.26907	Down Regulated	Chr2:1695453-1697219	HCR1	H72	OK	179.588	37.2581	-2.70162	0.00265	0.0383401	yes
XLOC_044656	XLOC_044656	LOC_Os06g14030	potassium channel SKOR, putative, expressed	-2.26747	Down Regulated	Chr6:7799072-7806571	HCR1	H72	OK	16.6424	3.45653	-2.7072	0.00455	0.0551499	no
XLOC_056933	XLOC_056933	LOC_Os09g25850	WAX2, putative, expressed	-2.26156	Down Regulated	Chr9:15492997-15497524	HCR1	H72	OK	26.4141	5.50858	-2.51419	0.0091	0.0900775	no
XLOC_006406	XLOC_006406	LOC_Os01g69090	CBS domain-containing protein, putative, expressed	-2.24881	Down Regulated	Chr1:40153159-40157182	HCR1	H72	OK	40.2765	8.47404	-2.70561	0.00595	0.066784	no
XLOC_008252	XLOC_008252	LOC_Os10g32810	beta-amylase, putative, expressed	-2.24482	Down Regulated	Chr10:17180756-17183465	HCR1	H72	OK	280.631	59.2076	-2.55869	0.00855	0.0855202	no
XLOC_048948	XLOC_048948	LOC_Os07g48500	stress responsive protein, putative, expressed	-2.23538	Down Regulated	Chr7:29008870-29009943	HCR1	H72	OK	307.986	65.4056	-2.63249	0.00385	0.0484625	yes
XLOC_014565	XLOC_014565	LOC_Os11g38650	UDP-glucoronosyl/UDP-glucosyl transferase, putative, expressed	-2.23248	Down Regulated	Chr11:22925986-22928036	HCR1	H72	OK	63.2462	13.4583	-2.84983	0.00265	0.0383401	yes
XLOC_000839	XLOC_000839	LOC_Os01g19480	kelch motif family protein, putative, expressed	-2.23115	Down Regulated	Chr1:11058877-11063978	HCR1	H72	OK	14.7398	3.13942	-2.65995	0.0052	0.0619623	no
XLOC_044281	XLOC_044281	LOC_Os06g06380	NBS-LRR type disease resistance protein, putative, expressed	-2.21635	Down Regulated	Chr6:2973520-2979496	HCR1	H72	OK	5.91031	1.27181	-2.58119	0.00635	0.0704188	no
XLOC_053515	XLOC_053515	LOC_Os08g01220	harpin-induced protein 1 domain containing protein, expressed	-2.21506	Down Regulated	Chr8:151885-153452	HCR1	H72	OK	72.3544	15.5835	-2.79427	0.00295	0.0419623	yes
XLOC_003427	XLOC_003427	LOC_Os01g02050	phosphoenolpyruvate carboxylase, putative, expressed	-2.21463	Down Regulated	Chr1:562055-572138	HCR1	H72	OK	18.6339	4.01452	-2.48295	0.0062	0.069066	no
XLOC_053763	XLOC_053763	LOC_Os08g05910	peptide transporter PTR2, putative, expressed	-2.20375	Down Regulated	Chr8:3182308-3190451	HCR1	H72	OK	115.976	25.1752	-2.73452	0.0035	0.0457396	yes
XLOC_029328	XLOC_029328	LOC_Os03g30950	acyl-desaturase, chloroplast precursor, putative, expressed	-2.19659	Down Regulated	Chr3:17623424-17625103	HCR1	H72	OK	42.498	9.27104	-2.57546	0.0073	0.0751514	no
XLOC_019917	XLOC_019917	LOC_Os02g10440	protein with a conserved N-terminal region, putative, expressed	-2.19616	Down Regulated	Chr2:5482727-5489303	HCR1	H72	OK	38.875	8.48322	-2.67169	0.0047	0.0567124	no
XLOC_019638	XLOC_019638	LOC_Os02g04680	OsSPL3 - SBP-box gene family member, expressed	-2.18413	Down Regulated	Chr2:2105193-2110544	HCR1	H72	OK	15.6762	3.44946	-2.53458	0.0088	0.0875767	no
XLOC_023752	XLOC_023752	LOC_Os02g35910	protein phosphotase protein, putative, expressed	-2.18218	Down Regulated	Chr2:21569210-21574268	HCR1	H72	OK	25.1319	5.53765	-2.85617	0.0027	0.0390063	yes
XLOC_004163	XLOC_004163	LOC_Os01g16960	pyruvate kinase, putative, expressed	-2.18155	Down Regulated	Chr1:9694026-9699817	HCR1	H72	OK	45.9002	10.1182	-2.8774	0.00195	0.0302217	yes
XLOC_032733	XLOC_032733	LOC_Os04g37600	phosphate carrier protein, mitochondrial precursor, putative, expressed	-2.18107	Down Regulated	Chr4:22362238-22367204	HCR1	H72	OK	36.6871	8.08995	-2.67476	0.0029	0.0413904	yes
XLOC_046043	XLOC_046043	LOC_Os06g43700	transmembrane amino acid transporter protein, putative, expressed	-2.15618	Down Regulated	Chr6:26312601-26315063	HCR1	H72	OK	16.4688	3.69477	-2.56193	0.00545	0.0643709	no
XLOC_048618	XLOC_048618	LOC_Os07g42370	zinc-finger protein, putative, expressed	-2.14599	Down Regulated	Chr7:25347982-25351810	HCR1	H72	OK	220.246	49.7623	-2.5754	0.00385	0.0484625	yes
XLOC_048098	XLOC_048098	LOC_Os07g31720	GTPase activating protein, putative, expressed	-2.14055	Down Regulated	Chr7:18840246-18842537	HCR1	H72	OK	97.5083	22.1142	-2.8504	0.00175	0.028622	yes
XLOC_006403	XLOC_006403	LOC_Os01g69030	sucrose-phosphate synthase, putative, expressed	-2.13199	Down Regulated	Chr1:40101403-40107195	HCR1	H72	OK	72.6312	16.5703	-2.35285	0.0079	0.0803773	no
XLOC_006322	XLOC_006322	LOC_Os01g67500	armadillo/beta-catenin repeat family protein, putative, expressed	-2.13069	Down Regulated	Chr1:39221749-39226573	HCR1	H72	OK	11.2571	2.57055	-2.51803	0.00825	0.0832513	no
XLOC_039271	XLOC_039271	LOC_Os05g04170	AMP-binding enzyme, putative, expressed	-2.12152	Down Regulated	Chr5:1866877-1874707	HCR1	H72	OK	34.5759	7.94572	-2.59721	0.0032	0.04485	yes
XLOC_026283	XLOC_026283	LOC_Os03g24220	villin protein, putative, expressed	-2.10586	Down Regulated	Chr3:13776880-13788688	HCR1	H72	OK	44.5898	10.3587	-2.38673	0.00555	0.0651322	no
XLOC_031156	XLOC_031156	LOC_Os04g01810	terpene synthase, putative, expressed	-2.09657	Down Regulated	Chr4:517640-524527	HCR1	H72	OK	16.0044	3.74202	-2.38686	0.00795	0.0807195	no
XLOC_026594	XLOC_026594	LOC_Os03g31150	expressed protein	-2.09073	Down Regulated	Chr3:17738065-17741592	HCR1	H72	OK	19.0623	4.47509	-2.60991	0.00535	0.0634431	no
XLOC_017651	XLOC_017651	LOC_Os12g09590	leafbladeless1, putative, expressed	-2.08503	Down Regulated	Chr12:5045137-5050558	HCR1	H72	OK	10.6	2.49833	-2.54324	0.0072	0.0744067	no
XLOC_026380	XLOC_026380	LOC_Os03g26080	nucleoside-triphosphatase, putative, expressed	-2.07779	Down Regulated	Chr3:14938456-14942303	HCR1	H72	OK	33.1185	7.845	-2.69392	0.00445	0.0542489	no
XLOC_055433	XLOC_055433	LOC_Os08g41280	membrane protein, putative, expressed	-2.0638	Down Regulated	Chr8:26072175-26074779	HCR1	H72	OK	61.0637	14.6055	-2.62726	0.0058	0.0655981	no
XLOC_037060	XLOC_037060	LOC_Os05g06050	N-acetylglucosaminyltransferase, putative, expressed	-2.06358	Down Regulated	Chr5:3030479-3033755	HCR1	H72	OK	15.969	3.82014	-2.37499	0.0086	0.0859042	no
XLOC_035429	XLOC_035429	LOC_Os04g38450	gamma-glutamyltranspeptidase 1 precursor, putative, expressed	-2.06234	Down Regulated	Chr4:22855358-22861007	HCR1	H72	OK	17.8867	4.28257	-2.50551	0.00935	0.0920594	no
XLOC_022607	XLOC_022607	LOC_Os02g10630	GRAM and C2 domains containing protein, putative, expressed	-2.05334	Down Regulated	Chr2:5586938-5593645	HCR1	H72	OK	8.30649	2.00125	-2.47919	0.00645	0.071394	no
XLOC_000312	XLOC_000312	LOC_Os01g07590	universal stress protein domain containing protein, putative, expressed	-2.04587	Down Regulated	Chr1:3645512-3650689	HCR1	H72	OK	32.4893	7.86812	-2.66609	0.00335	0.0457396	yes
XLOC_054781	XLOC_054781	LOC_Os08g27840	phosphoenolpyruvate carboxylase, putative, expressed	-2.0347	Down Regulated	Chr8:16964693-16970571	HCR1	H72	OK	57.7663	14.0983	-2.37582	0.00565	0.0651322	no
XLOC_005951	XLOC_005951	LOC_Os01g59900	expressed protein	-2.02885	Down Regulated	Chr1:34636150-34642998	HCR1	H72	OK	56.3825	13.8166	-2.52559	0.00685	0.0714133	no
XLOC_059078	XLOC_059078	LOC_Os09g34920	glycosyl hydrolase family 29, putative, expressed	-2.02487	Down Regulated	Chr9:20348938-20350901	HCR1	H72	OK	70.9032	17.4228	-2.64251	0.0058	0.0655981	no
XLOC_002747	XLOC_002747	LOC_Os01g60770	expansin precursor, putative, expressed	-2.01943	Down Regulated	Chr1:35145515-35147338	HCR1	H72	OK	65.8612	16.245	-2.46103	0.0078	0.079524	no
XLOC_034328	XLOC_034328	LOC_Os04g13220	ABC transporter family protein, putative, expressed	2.00941	Up Regulated	Chr4:7317231-7325790	HCR1	H72	OK	3.19946	12.8816	2.61747	0.00375	0.0484625	yes
XLOC_006555	XLOC_006555	LOC_Os01g72610	glycosyltransferase, putative, expressed	2.01078	Up Regulated	Chr1:42128221-42130347	HCR1	H72	OK	6.86899	27.682	2.33824	0.00895	0.0888603	no
XLOC_013087	XLOC_013087	LOC_Os11g05400	Ser/Thr protein phosphatase family protein, putative, expressed	2.0112	Up Regulated	Chr11:2423602-2426866	HCR1	H72	OK	15.1883	61.2269	2.38698	0.00855	0.0855202	no
XLOC_034894	XLOC_034894	LOC_Os04g25440	cytokinin-O-glucosyltransferase 2, putative, expressed	2.01626	Up Regulated	Chr4:14742170-14744334	HCR1	H72	OK	5.35074	21.6455	2.23928	0.0094	0.0924594	no
XLOC_007550	XLOC_007550	LOC_Os10g14180	expressed protein	2.024	Up Regulated	Chr10:7685088-7702488	HCR1	H72	OK	3.0211	12.2871	2.28401	0.0094	0.0924594	no
XLOC_005194	XLOC_005194	LOC_Os01g42380	pleiotropic drug resistance protein, putative, expressed	2.05232	Up Regulated	Chr1:24075064-24082181	HCR1	H72	OK	2.3004	9.54146	2.63926	0.0047	0.0567124	no
XLOC_025755	XLOC_025755	LOC_Os03g12820	ATP8, putative, expressed	2.05448	Up Regulated	Chr3:6895177-6898428	HCR1	H72	OK	7.8973	32.8048	2.51968	0.00465	0.0561778	no
XLOC_040735	XLOC_040735	LOC_Os05g36290	actin, putative, expressed	2.05533	Up Regulated	Chr5:21500569-21504248	HCR1	H72	OK	56.4294	234.543	2.38917	0.00955	0.0928523	no
XLOC_033197	XLOC_033197	LOC_Os04g47860	ZOS4-11 - C2H2 zinc finger protein, expressed	2.05673	Up Regulated	Chr4:28408663-28416032	HCR1	H72	OK	22.3848	93.1305	2.37908	0.00885	0.0880151	no
XLOC_002048	XLOC_002048	LOC_Os01g46760	protein phosphatase 2C, putative, expressed	2.06064	Up Regulated	Chr1:26652943-26658313	HCR1	H72	OK	12.2966	51.2979	2.6204	0.0048	0.0576604	no
XLOC_043705	XLOC_043705	LOC_Os06g45090	expressed protein	2.06243	Up Regulated	Chr6:27271965-27275353	HCR1	H72	OK	22.8447	95.4198	2.55464	0.00645	0.071394	no
XLOC_027226	XLOC_027226	LOC_Os03g47120	CBS domain containing protein, expressed	2.06306	Up Regulated	Chr3:26651538-26657847	HCR1	H72	OK	7.1321	29.8031	2.62173	0.0063	0.0700481	no
XLOC_005740	XLOC_005740	LOC_Os01g55280	expressed protein	2.06981	Up Regulated	Chr1:31815516-31816916	HCR1	H72	OK	14.4075	60.4873	2.59088	0.00425	0.0521762	no
XLOC_003880	XLOC_003880	LOC_Os01g11160	amino acid permease family protein, putative, expressed	2.07044	Up Regulated	Chr1:5983580-5985875	HCR1	H72	OK	11.5025	48.3121	2.48676	0.0091	0.0900775	no
XLOC_004764	XLOC_004764	LOC_Os01g32780	universal stress protein domain containing protein, putative, expressed	2.08085	Up Regulated	Chr1:17990827-17993764	HCR1	H72	OK	26.6858	112.896	2.78339	0.0029	0.0413904	yes
XLOC_057310	XLOC_057310	LOC_Os09g34214	UDP-glucoronosyl and UDP-glucosyl transferase domain containing protein, expressed	2.08736	Up Regulated	Chr9:20196707-20203852	HCR1	H72	OK	9.35425	39.7526	2.2875	0.00945	0.0927661	no
XLOC_042001	XLOC_042001	LOC_Os06g08280	protein kinase domain containing protein, expressed	2.09061	Up Regulated	Chr6:4008138-4013539	HCR1	H72	OK	13.0904	55.7554	2.58506	0.00775	0.079096	no
XLOC_050674	XLOC_050674	LOC_Os07g38380	transmembrane protein 49, putative, expressed	2.09438	Up Regulated	Chr7:23069202-23074579	HCR1	H72	OK	11.1492	47.6117	2.71657	0.0039	0.0484625	yes
XLOC_026240	XLOC_026240	LOC_Os03g22790	beta-amylase, putative, expressed	2.0947	Up Regulated	Chr3:13161912-13164014	HCR1	H72	OK	19.1337	81.7271	2.65313	0.00635	0.0704188	no
XLOC_059219	XLOC_059219	LOC_Os09g37949	serine/threonine-protein kinase SRPK1, putative, expressed	2.09952	Up Regulated	Chr9:21881094-21884723	HCR1	H72	OK	3.53215	15.1377	2.4514	0.00715	0.0740452	no
XLOC_024195	XLOC_024195	LOC_Os02g44820	rho-GTPase-activating protein-related, putative, expressed	2.10351	Up Regulated	Chr2:27137203-27138314	HCR1	H72	OK	52.1259	224.013	2.51372	0.0069	0.0717828	no
XLOC_013659	XLOC_013659	LOC_Os11g17610	expressed protein	2.10571	Up Regulated	Chr11:9815272-9820247	HCR1	H72	OK	7.07692	30.4596	2.45861	0.00925	0.0911962	no
XLOC_035422	XLOC_035422	LOC_Os04g38310	expressed protein	2.10956	Up Regulated	Chr4:22795144-22798778	HCR1	H72	OK	5.81187	25.0817	2.60304	0.0041	0.0507347	no
XLOC_054423	XLOC_054423	LOC_Os08g20020	octicosapeptide/Phox/Bem1p, putative, expressed	2.11054	Up Regulated	Chr8:11984553-11989799	HCR1	H72	OK	2.64665	11.4296	2.6867	0.0057	0.0651322	no
XLOC_057668	XLOC_057668	LOC_Os09g03090	expressed protein	2.11072	Up Regulated	Chr9:1464326-1470443	HCR1	H72	OK	16.4458	71.0306	2.75148	0.0036	0.0468808	yes
XLOC_021243	XLOC_021243	LOC_Os02g39570	ACT domain containing protein, expressed	2.11441	Up Regulated	Chr2:23885360-23890860	HCR1	H72	OK	18.8611	81.6708	2.62285	0.0048	0.0576604	no
XLOC_003249	XLOC_003249	LOC_Os01g71970	GRAS family transcription factor containing protein, expressed	2.1167	Up Regulated	Chr1:41711281-41714442	HCR1	H72	OK	13.2584	57.5018	2.56192	0.00575	0.0651322	no
XLOC_041348	XLOC_041348	LOC_Os05g50710	late embryogenesis abundant protein, putative, expressed	2.11754	Up Regulated	Chr5:29069225-29070559	HCR1	H72	OK	47.1067	204.421	2.54299	0.00455	0.0551499	no
XLOC_027352	XLOC_027352	LOC_Os03g49770	oxysterol-binding protein, putative, expressed	2.13046	Up Regulated	Chr3:28329950-28339179	HCR1	H72	OK	13.0642	57.2026	2.73046	0.0035	0.0457396	yes
XLOC_030335	XLOC_030335	LOC_Os03g53910	tetratricopeptide repeat domain containing protein, expressed	2.13058	Up Regulated	Chr3:30903858-30907128	HCR1	H72	OK	22.8131	99.8971	2.64788	0.00725	0.0748189	no
XLOC_015787	XLOC_015787	LOC_Os12g13380	adenylate kinase, putative, expressed	2.1312	Up Regulated	Chr12:7476415-7480311	HCR1	H72	OK	7.38578	32.3558	2.59192	0.00635	0.0704188	no
XLOC_047094	XLOC_047094	LOC_Os07g09814	OsFBX221 - F-box domain containing protein, expressed	2.13431	Up Regulated	Chr7:5219437-5226721	HCR1	H72	OK	8.40256	36.8896	2.73157	0.00385	0.0484625	yes
XLOC_032660	XLOC_032660	LOC_Os04g35130	expressed protein	2.14678	Up Regulated	Chr4:21349783-21353260	HCR1	H72	OK	7.50152	33.2196	2.58845	0.00565	0.0651322	no
XLOC_029295	XLOC_029295	LOC_Os03g30130	phospholipase C, putative, expressed	2.15733	Up Regulated	Chr3:17207278-17210591	HCR1	H72	OK	4.81388	21.4741	2.55506	0.00725	0.0748189	no
XLOC_027829	XLOC_027829	LOC_Os03g60080	NAC domain-containing protein 67, putative, expressed	2.15956	Up Regulated	Chr3:34166098-34167546	HCR1	H72	OK	27.5517	123.095	2.65063	0.00455	0.0551499	no
XLOC_024617	XLOC_024617	LOC_Os02g53070	HYS1, putative, expressed	2.16607	Up Regulated	Chr2:32469557-32472659	HCR1	H72	OK	3.02524	13.5772	2.66637	0.00565	0.0651322	no
XLOC_053782	XLOC_053782	LOC_Os08g06330	zinc finger C-x8-C-x5-C-x3-H type family protein, expressed	2.16747	Up Regulated	Chr8:3508748-3512206	HCR1	H72	OK	8.46743	38.0386	2.58184	0.00345	0.0457396	yes
XLOC_046997	XLOC_046997	LOC_Os07g07930	LTPL78 - Protease inhibitor/seed storage/LTP family protein precursor, expressed	2.16931	Up Regulated	Chr7:3980210-3981284	HCR1	H72	OK	10.0993	45.4276	2.36762	0.00905	0.0897327	no
XLOC_021739	XLOC_021739	LOC_Os02g50210	erwinia induced protein 2, putative, expressed	2.17013	Up Regulated	Chr2:30658423-30664384	HCR1	H72	OK	56.1212	252.581	2.6053	0.0064	0.0709201	no
XLOC_021739	XLOC_021739	LOC_Os02g50220	expressed protein	2.17013	Up Regulated	Chr2:30658423-30664384	HCR1	H72	OK	56.1212	252.581	2.6053	0.0064	0.0709201	no
XLOC_041077	XLOC_041077	LOC_Os05g44340	heat shock protein 101, putative, expressed	2.17127	Up Regulated	Chr5:25803529-25807160	HCR1	H72	OK	8.26543	37.2291	2.64517	0.0059	0.0663739	no
XLOC_005393	XLOC_005393	LOC_Os01g47270	DUF1645 domain containing protein, putative, expressed	2.17144	Up Regulated	Chr1:27014071-27014866	HCR1	H72	OK	9.77882	44.051	2.30575	0.00935	0.0920594	no
XLOC_013924	XLOC_013924	LOC_Os11g24510	OsSCP56 - Putative Serine Carboxypeptidase homologue, expressed	2.17237	Up Regulated	Chr11:13971644-13979649	HCR1	H72	OK	27.0878	122.102	2.7922	0.0031	0.0436345	yes
XLOC_036436	XLOC_036436	LOC_Os04g58330	expressed protein	2.18042	Up Regulated	Chr4:34717760-34721403	HCR1	H72	OK	7.87729	35.7067	2.68717	0.00485	0.0581902	no
XLOC_032819	XLOC_032819	LOC_Os04g39440	ras-related protein, putative, expressed	2.1965	Up Regulated	Chr4:23492934-23495366	HCR1	H72	OK	23.3204	106.893	2.85138	0.0031	0.0436345	yes
XLOC_038964	XLOC_038964	LOC_Os05g48760	protein of unknown function DUF1421 domain containing protein, expressed	2.19977	Up Regulated	Chr5:27944013-27948004	HCR1	H72	OK	6.90666	31.7296	2.75275	0.00465	0.0561778	no
XLOC_010846	XLOC_010846	LOC_Os11g03420	ZF-HD protein dimerisation region containing protein, expressed	2.20077	Up Regulated	Chr11:1298249-1298993	HCR1	H72	OK	24.9504	114.703	2.62175	0.0059	0.0663739	no
XLOC_031194	XLOC_031194	LOC_Os04g02754	amidase family protein, putative, expressed	2.20304	Up Regulated	Chr4:1054608-1070954	HCR1	H72	OK	16.9833	78.1996	2.78592	0.00575	0.0651322	no
XLOC_035493	XLOC_035493	LOC_Os04g39540	expressed protein	2.20525	Up Regulated	Chr4:23543941-23551654	HCR1	H72	OK	5.03087	23.2001	2.52222	0.0088	0.0875767	no
XLOC_001734	XLOC_001734	LOC_Os01g40280	integral membrane protein, putative, expressed	2.20609	Up Regulated	Chr1:22742518-22747184	HCR1	H72	OK	11.0968	51.2034	2.63127	0.00335	0.0457396	yes
XLOC_013759	XLOC_013759	LOC_Os11g19864	transposon protein, putative, Pong sub-class, expressed	2.21458	Up Regulated	Chr11:11436950-11446266	HCR1	H72	OK	1.47578	6.84977	2.43811	0.00735	0.0756398	no
XLOC_053009	XLOC_053009	LOC_Os08g35190	auxin-repressed protein, putative, expressed	2.21475	Up Regulated	Chr8:22190135-22191839	HCR1	H72	OK	47.0393	218.357	2.63375	0.0072	0.0744067	no
XLOC_054858	XLOC_054858	LOC_Os08g29570	pleiotropic drug resistance protein 3, putative, expressed	2.21528	Up Regulated	Chr8:18128513-18137601	HCR1	H72	OK	2.40499	11.1681	2.56094	0.0061	0.0681574	no
XLOC_030701	XLOC_030701	LOC_Os03g62030	expressed protein	2.22164	Up Regulated	Chr3:35147240-35149805	HCR1	H72	OK	11.5839	54.0298	2.66404	0.0036	0.0468808	yes
XLOC_032817	XLOC_032817	LOC_Os04g39420	6-phosphofructokinase 2, putative, expressed	2.22453	Up Regulated	Chr4:23463356-23465733	HCR1	H72	OK	4.92964	23.0391	2.66259	0.00465	0.0561778	no
XLOC_042635	XLOC_042635	LOC_Os06g22060	pyrophosphate--fructose 6-phosphate 1-phosphotransferase subunit alpha, putative, expressed	2.232	Up Regulated	Chr6:12794241-12800358	HCR1	H72	OK	7.67278	36.0456	2.91178	0.0018	0.0292619	yes
XLOC_050517	XLOC_050517	LOC_Os07g35370	TKL_IRAK_DUF26-lc.15 - DUF26 kinases have homology to DUF26 containing loci, expressed	2.2327	Up Regulated	Chr7:21155349-21158977	HCR1	H72	OK	1.94826	9.15709	2.36092	0.00945	0.0927661	no
XLOC_006102	XLOC_006102	LOC_Os01g63010	universal stress protein domain containing protein, putative, expressed	2.23888	Up Regulated	Chr1:36496068-36498206	HCR1	H72	OK	5.29415	24.99	2.60518	0.00535	0.0634431	no
XLOC_050605	XLOC_050605	LOC_Os07g37100	nucleoside transporter, putative, expressed	2.24383	Up Regulated	Chr7:22231007-22234711	HCR1	H72	OK	23.1305	109.558	2.87652	0.00325	0.0453788	yes
XLOC_038390	XLOC_038390	LOC_Os05g36160	G-box-binding factor 4, putative, expressed	2.24459	Up Regulated	Chr5:21432456-21435725	HCR1	H72	OK	8.33762	39.5123	2.71614	0.0043	0.0527026	no
XLOC_048943	XLOC_048943	LOC_Os07g48450	no apical meristem protein, putative, expressed	2.24828	Up Regulated	Chr7:28985796-28988032	HCR1	H72	OK	9.8446	46.7733	2.68512	0.00705	0.0731632	no
XLOC_003435	XLOC_003435	LOC_Os01g02200	armadillo/beta-catenin repeat family protein, putative, expressed	2.25162	Up Regulated	Chr1:648127-651881	HCR1	H72	OK	10.1783	48.471	3.05228	0.0014	0.0251041	yes
XLOC_042712	XLOC_042712	LOC_Os06g23684	tyrosine aminotransferase, putative, expressed	2.25843	Up Regulated	Chr6:13835581-13844081	HCR1	H72	OK	2.72214	13.0246	2.51564	0.00905	0.0897327	no
XLOC_023438	XLOC_023438	LOC_Os02g29210	ankyrin, putative, expressed	2.26957	Up Regulated	Chr2:17327564-17335614	HCR1	H72	OK	2.36651	11.4108	2.42221	0.00825	0.0832513	no
XLOC_059179	XLOC_059179	LOC_Os09g37330	OsSAUR39 - Auxin-responsive SAUR gene family member, expressed	2.27993	Up Regulated	Chr9:21565735-21566560	HCR1	H72	OK	6.975	33.8744	2.59641	0.00955	0.0928523	no
XLOC_005631	XLOC_005631	LOC_Os01g52790	cytochrome P450 72A1, putative, expressed	2.28195	Up Regulated	Chr1:30372203-30376917	HCR1	H72	OK	2.54191	12.3622	2.73691	0.00305	0.0430331	yes
XLOC_011792	XLOC_011792	LOC_Os11g25780	PB1 domain containing protein, expressed	2.28929	Up Regulated	Chr11:14705214-14714572	HCR1	H72	OK	24.2929	118.747	2.80285	0.0033	0.0457396	yes
XLOC_039150	XLOC_039150	LOC_Os05g01460	STIP1 homology and U box-containing protein 1, putative, expressed	2.29131	Up Regulated	Chr5:263718-266460	HCR1	H72	OK	8.40807	41.1577	2.9079	0.0021	0.0314596	yes
XLOC_026596	XLOC_026596	LOC_Os03g31180	diacylglycerol kinase 1, putative, expressed	2.29362	Up Regulated	Chr3:17754755-17761133	HCR1	H72	OK	5.41362	26.5422	2.78382	0.00965	0.0932749	no
XLOC_036391	XLOC_036391	LOC_Os04g57550	amine oxidase, flavin-containing, domain containing protein, expressed	2.31832	Up Regulated	Chr4:34239803-34243195	HCR1	H72	OK	21.8146	108.8	2.83815	0.0044	0.0537723	no
XLOC_058992	XLOC_058992	LOC_Os09g32330	expressed protein	2.31942	Up Regulated	Chr9:19302891-19305020	HCR1	H72	OK	32.1847	160.644	2.86101	0.00285	0.0408541	yes
XLOC_008005	XLOC_008005	LOC_Os10g26540	expressed protein	2.32005	Up Regulated	Chr10:13833332-13836254	HCR1	H72	OK	25.8761	129.212	2.57316	0.0072	0.0744067	no
XLOC_022325	XLOC_022325	LOC_Os02g04230	CGMC_MAPKCMGC_2.7 - CGMC includes CDA, MAPK, GSK3, and CLKC kinases, expressed	2.32119	Up Regulated	Chr2:1850953-1859013	HCR1	H72	OK	1.92549	9.62255	2.65111	0.0074	0.0761014	no
XLOC_053547	XLOC_053547	LOC_Os08g01770	adenylate kinase, putative, expressed	2.32422	Up Regulated	Chr8:461436-464815	HCR1	H72	OK	12.5826	63.0133	3.10877	0.0012	0.0225999	yes
XLOC_025257	XLOC_025257	LOC_Os03g02560	cyclin-like F-box, putative, expressed	2.329	Up Regulated	Chr3:945890-949062	HCR1	H72	OK	22.0926	111.006	2.89774	0.0032	0.04485	yes
XLOC_061161	XLOC_061161	LOC_Os09g39020	N-rich protein, putative, expressed	2.33149	Up Regulated	Chr9:22400068-22404369	HCR1	H72	OK	1.21764	6.12864	2.53906	0.0061	0.0681574	no
XLOC_026350	XLOC_026350	LOC_Os03g25440	expressed protein	2.338	Up Regulated	Chr3:14543749-14544785	HCR1	H72	OK	15.8515	80.1449	2.72376	0.00375	0.0484625	yes
XLOC_001076	XLOC_001076	LOC_Os01g24880	zinc finger, C3HC4 type domain containing protein, expressed	2.34534	Up Regulated	Chr1:14011521-14019774	HCR1	H72	OK	15.9532	81.0711	2.65269	0.0041	0.0507347	no
XLOC_025616	XLOC_025616	LOC_Os03g10240	DUF677 domain containing protein, putative, expressed	2.34787	Up Regulated	Chr3:5214068-5217741	HCR1	H72	OK	8.37782	42.6492	2.99544	0.00195	0.0302217	yes
XLOC_038328	XLOC_038328	LOC_Os05g34830	No apical meristem protein, putative, expressed	2.35094	Up Regulated	Chr5:20678000-20680343	HCR1	H72	OK	17.8055	90.8358	2.85169	0.00305	0.0430331	yes
XLOC_010080	XLOC_010080	LOC_Os10g32680	expressed protein	2.3692	Up Regulated	Chr10:17112002-17115452	HCR1	H72	OK	23.3719	120.752	3.14018	0.0009	0.0179557	yes
XLOC_037194	XLOC_037194	LOC_Os05g08970	SSRP1-like FACT complex subunit, putative, expressed	2.37282	Up Regulated	Chr5:4965424-4971029	HCR1	H72	OK	6.02971	31.2311	3.02578	0.00345	0.0457396	yes
XLOC_001642	XLOC_001642	LOC_Os01g38510	protein transport protein Sec61 subunit beta, putative, expressed	2.37465	Up Regulated	Chr1:21631045-21632894	HCR1	H72	OK	16.8588	87.4314	1.75104	0.0053	0.0630016	no
XLOC_008621	XLOC_008621	LOC_Os10g40360	proline oxidase, mitochondrial precursor, putative, expressed	2.37623	Up Regulated	Chr10:21617951-21620589	HCR1	H72	OK	10.4775	54.3969	2.87232	0.00325	0.0453788	yes
XLOC_041211	XLOC_041211	LOC_Os05g47870	expressed protein	2.3768	Up Regulated	Chr5:27449300-27455772	HCR1	H72	OK	3.33028	17.2969	2.90843	0.00375	0.0484625	yes
XLOC_032630	XLOC_032630	LOC_Os04g34530	integral membrane protein DUF6 containing protein, expressed	2.38919	Up Regulated	Chr4:20897564-20902883	HCR1	H72	OK	8.2988	43.4744	2.71318	0.00515	0.0614407	no
XLOC_029735	XLOC_029735	LOC_Os03g40930	expressed protein	2.4012	Up Regulated	Chr3:22744278-22747265	HCR1	H72	OK	2.94751	15.57	2.54327	0.00785	0.0800062	no
XLOC_038551	XLOC_038551	LOC_Os05g39930	spotted leaf 11, putative, expressed	2.4104	Up Regulated	Chr5:23463229-23465862	HCR1	H72	OK	3.5057	18.6371	2.56271	0.00705	0.0731632	no
XLOC_012310	XLOC_012310	LOC_Os11g37260	SEY1, putative, expressed	2.42053	Up Regulated	Chr11:22003367-22010520	HCR1	H72	OK	8.87485	47.5132	2.79385	0.00875	0.0871378	no
XLOC_002071	XLOC_002071	LOC_Os01g47262	AMSH-like protease, putative, expressed	2.42369	Up Regulated	Chr1:27008273-27012123	HCR1	H72	OK	16.0898	86.3284	3.07403	0.00405	0.0502	no
XLOC_046795	XLOC_046795	LOC_Os07g03710	SCP-like extracellular protein, expressed	2.43263	Up Regulated	Chr7:1512024-1512958	HCR1	H72	OK	14.3713	77.5868	2.74623	0.0025	0.0365272	yes
XLOC_010942	XLOC_010942	LOC_Os11g05410	Ser/Thr protein phosphatase family protein, putative, expressed	2.43327	Up Regulated	Chr11:2432925-2437032	HCR1	H72	OK	7.82908	42.2862	2.51684	0.0051	0.0608688	no
XLOC_006225	XLOC_006225	LOC_Os01g65670	amino acid transporter, putative, expressed	2.43795	Up Regulated	Chr1:38133430-38138004	HCR1	H72	OK	6.49052	35.1703	2.67093	0.0082	0.0828881	no
XLOC_036880	XLOC_036880	LOC_Os05g02420	expressed protein	2.44212	Up Regulated	Chr5:801086-803464	HCR1	H72	OK	32.4569	176.384	2.82312	0.00575	0.0651322	no
XLOC_008653	XLOC_008653	LOC_Os10g41230	homeobox associated leucine zipper, putative, expressed	2.44334	Up Regulated	Chr10:22152630-22154163	HCR1	H72	OK	7.06198	38.4101	2.6886	0.006	0.0671415	no
XLOC_038951	XLOC_038951	LOC_Os05g48340	proteasome-related, putative, expressed	2.44983	Up Regulated	Chr5:27712280-27717899	HCR1	H72	OK	11.0752	60.5097	3.26635	0.00085	0.0171782	yes
XLOC_053247	XLOC_053247	LOC_Os08g39850	lipoxygenase, chloroplast precursor, putative, expressed	2.45212	Up Regulated	Chr8:25216362-25250279	HCR1	H72	OK	2.29385	12.5524	2.44193	0.0085	0.0852507	no
XLOC_062816	XLOC_062816	LOC_Os09g36830	Skp1 family, dimerisation domain containing protein, expressed	2.45374	Up Regulated	Chr9:21242825-21245871	HCR1	H72	OK	20.5815	112.752	2.91173	0.0022	0.0327916	yes
XLOC_039410	XLOC_039410	LOC_Os05g07090	acyl-coenzyme A dehydrogenase, mitochondrial precursor, putative, expressed	2.45843	Up Regulated	Chr5:3730311-3735256	HCR1	H72	OK	12.7729	70.2019	3.16194	0.00195	0.0302217	yes
XLOC_006600	XLOC_006600	LOC_Os01g73780	chloroplast outer envelope 24 kD protein, putative, expressed	2.46319	Up Regulated	Chr1:42735991-42737940	HCR1	H72	OK	17.4587	96.2734	2.89092	0.003	0.0425304	yes
XLOC_044830	XLOC_044830	LOC_Os06g17290	phosphatidylinositol 3- and 4-kinase family protein, putative, expressed	2.4696	Up Regulated	Chr6:10013740-INF17979	HCR1	H72	OK	10.0822	55.8445	2.78012	0.00505	0.0603451	no
XLOC_059103	XLOC_059103	LOC_Os09g35800	UDP-glucose 4-epimerase, putative, expressed	2.47352	Up Regulated	Chr9:20600603-20603003	HCR1	H72	OK	8.14996	45.2648	2.90608	0.0028	0.040274	yes
XLOC_012352	XLOC_012352	LOC_Os11g37950	WIP3 - Wound-induced protein precursor, expressed	2.47484	Up Regulated	Chr11:22502006-22503109	HCR1	H72	OK	20.2875	112.779	3.15327	0.0015	0.026417	yes
XLOC_015284	XLOC_015284	LOC_Os12g03110	ZF-HD protein dimerisation region containing protein, expressed	2.47589	Up Regulated	Chr12:1180357-1181099	HCR1	H72	OK	26.5615	147.765	2.84605	0.0038	0.0484625	yes
XLOC_049256	XLOC_049256	LOC_Os07g06490	DNA binding protein, putative, expressed	2.48548	Up Regulated	Chr7:3149942-3152648	HCR1	H72	OK	5.29803	29.6701	2.78714	0.00485	0.0581902	no
XLOC_027350	XLOC_027350	LOC_Os03g49720	PAP fibrillin family domain containing protein, expressed	2.48736	Up Regulated	Chr3:28304984-28307930	HCR1	H72	OK	9.14381	51.2741	2.90119	0.00325	0.0453788	yes
XLOC_043278	XLOC_043278	LOC_Os06g37020	expressed protein	2.49743	Up Regulated	Chr6:21841185-21842474	HCR1	H72	OK	13.5114	76.2963	2.93118	0.0011	0.0212578	yes
XLOC_024719	XLOC_024719	LOC_Os02g55080	snf1-related kinase interactor 2, putative, expressed	2.49853	Up Regulated	Chr2:33734389-33737395	HCR1	H72	OK	14.7414	83.3053	3.13886	0.0008	0.0166336	yes
XLOC_032563	XLOC_032563	LOC_Os04g33490	neutral/alkaline invertase, putative, expressed	2.49912	Up Regulated	Chr4:20256136-20259317	HCR1	H72	OK	6.45736	36.506	3.25688	0.0013	0.0239944	yes
XLOC_053749	XLOC_053749	LOC_Os08g05660	expressed protein	2.50195	Up Regulated	Chr8:3022571-3026962	HCR1	H72	OK	10.7531	60.911	3.01031	0.0013	0.0239944	yes
XLOC_021868	XLOC_021868	LOC_Os02g52770	expressed protein	2.50356	Up Regulated	Chr2:32273866-32275255	HCR1	H72	OK	59.0633	334.938	2.54008	0.00455	0.0551499	no
XLOC_004385	XLOC_004385	LOC_Os01g22600	mitochondrial carrier protein, putative, expressed	2.50656	Up Regulated	Chr1:12704699-12709808	HCR1	H72	OK	7.45289	42.3521	3.16424	0.0011	0.0212578	yes
XLOC_025666	XLOC_025666	LOC_Os03g11290	expressed protein	2.50891	Up Regulated	Chr3:5807832-5812781	HCR1	H72	OK	1.95317	11.1172	3.00438	0.00325	0.0453788	yes
XLOC_003806	XLOC_003806	LOC_Os01g09620	zinc finger/CCCH transcription factor, putative, expressed	2.51079	Up Regulated	Chr1:4949046-4951126	HCR1	H72	OK	23.8492	135.925	2.94818	0.0026	0.0377459	yes
XLOC_032413	XLOC_032413	LOC_Os04g30420	dehydrogenase, putative, expressed	2.51141	Up Regulated	Chr4:18168722-18172037	HCR1	H72	OK	9.33808	53.2435	2.87208	0.00305	0.0430331	yes
XLOC_051724	XLOC_051724	LOC_Os08g08840	phosphate/phosphate translocator, putative, expressed	2.51476	Up Regulated	Chr8:5139636-5143709	HCR1	H72	OK	39.4369	225.384	2.54563	0.0096	0.0928523	no
XLOC_047061	XLOC_047061	LOC_Os07g09190	transketolase, putative, expressed	2.51641	Up Regulated	Chr7:4821206-4824667	HCR1	H72	OK	6.3587	36.3817	3.06577	0.00135	0.0246103	yes
XLOC_009604	XLOC_009604	LOC_Os10g21590	transporter family protein, putative, expressed	2.52507	Up Regulated	Chr10:11053027-11057893	HCR1	H72	OK	5.52464	31.7999	2.57163	0.0076	0.0778336	no
XLOC_021206	XLOC_021206	LOC_Os02g38840	glucose-6-phosphate 1-dehydrogenase, cytoplasmic isoform, putative, expressed	2.52729	Up Regulated	Chr2:23480214-23486812	HCR1	H72	OK	1.90435	10.9783	2.84632	0.0048	0.0576604	no
XLOC_040941	XLOC_040941	LOC_Os05g40720	glycosyl transferase, family 8, putative, expressed	2.53382	Up Regulated	Chr5:23873791-23878533	HCR1	H72	OK	0.803863	4.65519	2.55519	0.00945	0.0927661	no
XLOC_036458	XLOC_036458	LOC_Os04g58710	AMP-binding domain containing protein, expressed	2.53474	Up Regulated	Chr4:34908440-34910661	HCR1	H72	OK	22.9749	133.133	3.12514	0.0018	0.0292619	yes
XLOC_021712	XLOC_021712	LOC_Os02g49770	NHL repeat-containing protein, putative, expressed	2.5417	Up Regulated	Chr2:30427719-30431741	HCR1	H72	OK	2.70473	15.749	2.51353	0.0063	0.0700481	no
XLOC_036338	XLOC_036338	LOC_Os04g56580	inositol 1,3,4,5,6-pentakisphosphate 2-kinase, putative, expressed	2.5456	Up Regulated	Chr4:33735142-33739411	HCR1	H72	OK	9.07666	52.9942	3.36995	0.0004	0.0103451	yes
XLOC_034509	XLOC_034509	LOC_Os04g17100	heavy metal-associated domain containing protein, expressed	2.54963	Up Regulated	Chr4:9367934-9369158	HCR1	H72	OK	31.2025	182.685	2.80217	0.00855	0.0855202	no
XLOC_029976	XLOC_029976	LOC_Os03g46070	thaumatin, putative, expressed	2.55061	Up Regulated	Chr3:26034425-26035357	HCR1	H72	OK	14.4313	84.5504	2.89334	0.0019	0.0297908	yes
XLOC_041264	XLOC_041264	LOC_Os05g48810	dnaJ domain containing protein, expressed	2.55457	Up Regulated	Chr5:27972290-27974607	HCR1	H72	OK	1.91452	11.2477	2.53252	0.0085	0.0852507	no
XLOC_003222	XLOC_003222	LOC_Os01g71340	glycosyl hydrolases family 17, putative, expressed	2.55495	Up Regulated	Chr1:41346573-41348411	HCR1	H72	OK	8.22056	48.3077	2.57155	0.0079	0.0803773	no
XLOC_043770	XLOC_043770	LOC_Os06g46570	galactosyltransferase, putative, expressed	2.55709	Up Regulated	Chr6:28275615-28279475	HCR1	H72	OK	2.57694	15.1658	3.05912	0.0026	0.0377459	yes
XLOC_049268	XLOC_049268	LOC_Os07g06830	gibberellin receptor GID1L2, putative, expressed	2.55797	Up Regulated	Chr7:3332885-3334275	HCR1	H72	OK	10.363	61.0256	2.79393	0.00655	0.0714133	no
XLOC_037288	XLOC_037288	LOC_Os05g11320	metallothionein-like protein 3B, putative, expressed	2.55989	Up Regulated	Chr5:6393879-6396096	HCR1	H72	OK	167.517	987.785	2.93829	0.00425	0.0521762	no
XLOC_005380	XLOC_005380	LOC_Os01g46970	transcription factor, putative, expressed	2.56591	Up Regulated	Chr1:26800059-26805624	HCR1	H72	OK	4.31559	25.5538	2.97904	0.00305	0.0430331	yes
XLOC_035780	XLOC_035780	LOC_Os04g45470	vacuolar-processing enzyme precursor, putative, expressed	2.57226	Up Regulated	Chr4:26900890-26908679	HCR1	H72	OK	17.5407	104.322	3.07822	0.00085	0.0171782	yes
XLOC_046271	XLOC_046271	LOC_Os06g48060	ABC transporter, ATP-binding protein, putative, expressed	2.57329	Up Regulated	Chr6:29072343-29076031	HCR1	H72	OK	3.76381	22.4009	2.78362	0.00275	0.0396319	yes
XLOC_020569	XLOC_020569	LOC_Os02g25080	expressed protein	2.57405	Up Regulated	Chr2:14557081-14559123	HCR1	H72	OK	5.15919	30.7219	2.87021	0.0046	0.0556419	no
XLOC_002325	XLOC_002325	LOC_Os01g52260	serine acetyltransferase protein, putative, expressed	2.57646	Up Regulated	Chr1:30042526-30043938	HCR1	H72	OK	8.90861	53.1378	2.91668	0.00415	0.0512891	no
XLOC_060832	XLOC_060832	LOC_Os09g30300	expressed protein	2.58078	Up Regulated	Chr9:18448162-18449631	HCR1	H72	OK	16.8043	100.534	3.09256	0.0016	0.0270819	yes
XLOC_003487	XLOC_003487	LOC_Os01g03060	splicing factor, putative, expressed	2.58254	Up Regulated	Chr1:1168646-1171130	HCR1	H72	OK	18.732	112.204	3.15499	0.0085	0.0852507	no
XLOC_032779	XLOC_032779	LOC_Os04g38540	aldose 1-epimerase, putative, expressed	2.58666	Up Regulated	Chr4:22902576-22905751	HCR1	H72	OK	2.48855	14.9489	2.63753	0.00895	0.0888603	no
XLOC_057344	XLOC_057344	LOC_Os09g35940	cytochrome P450, putative, expressed	2.5867	Up Regulated	Chr9:20691305-20693116	HCR1	H72	OK	5.78798	34.7696	2.54825	0.0053	0.0630016	no
XLOC_017428	XLOC_017428	LOC_Os12g05050	stem-specific protein TSJT1, putative, expressed	2.58735	Up Regulated	Chr12:2215861-2219491	HCR1	H72	OK	72.2387	434.15	2.6517	0.0083	0.0835563	no
XLOC_062372	XLOC_062372	LOC_Os09g25620	CPuORF8 - conserved peptide uORF-containing transcript, expressed	2.59359	Up Regulated	Chr9:15385600-15389096	HCR1	H72	OK	18.0521	108.963	2.97871	0.00655	0.0714133	no
XLOC_048204	XLOC_048204	LOC_Os07g33850	ras-related protein, putative, expressed	2.60716	Up Regulated	Chr7:20249138-20253102	HCR1	H72	OK	9.86729	60.1218	3.05421	0.00205	0.0308511	yes
XLOC_053789	XLOC_053789	LOC_Os08g06420	abhydrolase domain-containing protein FAM108C1, putative, expressed	2.60976	Up Regulated	Chr8:3596346-3601698	HCR1	H72	OK	3.90623	23.8437	2.17588	0.0062	0.069066	no
XLOC_041334	XLOC_041334	LOC_Os05g50380	glucose-1-phosphate adenylyltransferase large subunit, chloroplast precursor, putative, expressed	2.61498	Up Regulated	Chr5:28871793-28877277	HCR1	H72	OK	34.1362	209.124	2.56195	0.00805	0.0815669	no
XLOC_014359	XLOC_014359	LOC_Os11g34390	glycosyltransferase, putative, expressed	2.62037	Up Regulated	Chr11:20151691-20154022	HCR1	H72	OK	3.01428	18.535	2.49275	0.0079	0.0803773	no
XLOC_010440	XLOC_010440	LOC_Os10g40934	flavonol synthase/flavanone 3-hydroxylase, putative, expressed	2.62524	Up Regulated	Chr10:21988521-21993809	HCR1	H72	OK	3.32378	20.5073	3.02995	0.00195	0.0302217	yes
XLOC_054241	XLOC_054241	LOC_Os08g15840	ankyrin repeat-rich protein, putative, expressed	2.62674	Up Regulated	Chr8:9628568-9634472	HCR1	H72	OK	5.82355	35.9679	2.68936	0.00285	0.0408541	yes
XLOC_035680	XLOC_035680	LOC_Os04g43360	Os4bglu14 - monolignol beta-glucoside homologue without catalytic acid/base, expressed	2.62783	Up Regulated	Chr4:25640267-25644667	HCR1	H72	OK	1.52527	9.42764	2.75407	0.0059	0.0663739	no
XLOC_049270	XLOC_049270	LOC_Os07g06850	gibberellin receptor GID1L2, putative, expressed	2.6329	Up Regulated	Chr7:3344779-3346557	HCR1	H72	OK	2.85292	17.6958	2.69374	0.00825	0.0832513	no
XLOC_030289	XLOC_030289	LOC_Os03g52760	kinase, pfkB family, putative, expressed	2.63329	Up Regulated	Chr3:30244171-30247408	HCR1	H72	OK	8.01699	49.7404	3.18853	0.00155	0.0264627	yes
XLOC_008582	XLOC_008582	LOC_Os10g39640	expansin precursor, putative, expressed	2.63933	Up Regulated	Chr10:21179528-21181718	HCR1	H72	OK	4.72759	29.4548	2.91645	0.00195	0.0302217	yes
XLOC_013267	XLOC_013267	LOC_Os11g09180	expressed protein	2.65495	Up Regulated	Chr11:4923838-4925639	HCR1	H72	OK	4.00337	25.2142	2.97182	0.0037	0.0480984	yes
XLOC_019529	XLOC_019529	LOC_Os02g02700	AMP-binding enzyme, putative, expressed	2.65638	Up Regulated	Chr2:1013989-1016215	HCR1	H72	OK	2.80114	17.6597	2.71349	0.0096	0.0928523	no
XLOC_056481	XLOC_056481	LOC_Os09g15320	ubiquitin-conjugating enzyme, putative, expressed	2.65857	Up Regulated	Chr9:9357954-9362416	HCR1	H72	OK	8.27447	52.2457	3.21661	0.00255	0.0371294	yes
XLOC_035397	XLOC_035397	LOC_Os04g37670	steroid nuclear receptor, ligand-binding, putative, expressed	2.65913	Up Regulated	Chr4:22396528-22401800	HCR1	H72	OK	1.93763	12.2391	3.04611	0.00255	0.0371294	yes
XLOC_035586	XLOC_035586	LOC_Os04g41570	ethylene-responsive protein related, putative, expressed	2.66225	Up Regulated	Chr4:24655104-24660148	HCR1	H72	OK	9.88443	62.5702	3.34207	0.00065	0.0139764	yes
XLOC_022764	XLOC_022764	LOC_Os02g14190	spermidine synthase, putative, expressed	2.66237	Up Regulated	Chr2:7772398-7776161	HCR1	H72	OK	1.51286	9.57751	2.69766	0.0045	0.0547232	no
XLOC_035540	XLOC_035540	LOC_Os04g40460	cytochrome P450, putative, expressed	2.67334	Up Regulated	Chr4:24043879-24051142	HCR1	H72	OK	4.57349	29.1744	2.56134	0.008	0.081088	no
XLOC_035540	XLOC_035540	LOC_Os04g40470	cytochrome P450, putative, expressed	2.67334	Up Regulated	Chr4:24043879-24051142	HCR1	H72	OK	4.57349	29.1744	2.56134	0.008	0.081088	no
XLOC_016883	XLOC_016883	LOC_Os12g37519	retrotransposon protein, putative, unclassified, expressed	2.67481	Up Regulated	Chr12:23025354-23028273	HCR1	H72	OK	10.0766	64.3445	2.67127	0.0053	0.0630016	no
XLOC_008279	XLOC_008279	LOC_Os10g33350	endo-beta-N-acetylglucosaminidase, putative, expressed	2.68783	Up Regulated	Chr10:17544601-17547705	HCR1	H72	OK	6.33921	40.8462	3.08351	0.0043	0.0527026	no
XLOC_006467	XLOC_006467	LOC_Os01g70790	SRC2 protein, putative, expressed	2.69802	Up Regulated	Chr1:40973254-40974782	HCR1	H72	OK	19.4491	126.208	2.99835	0.0021	0.0314596	yes
XLOC_029975	XLOC_029975	LOC_Os03g46060	thaumatin family domain containing protein, expressed	2.72181	Up Regulated	Chr3:26032939-26033802	HCR1	H72	OK	38.9663	257.061	3.33474	0.0009	0.0179557	yes
XLOC_055511	XLOC_055511	LOC_Os08g42910	peptidase, M24 family protein, putative, expressed	2.72247	Up Regulated	Chr8:27123638-27127561	HCR1	H72	OK	1.91027	12.6078	3.07617	0.0045	0.0547232	no
XLOC_010468	XLOC_010468	LOC_Os10g41490	CAMK_CAMK_like.41 - CAMK includes calcium/calmodulin depedent protein kinases, expressed	2.72616	Up Regulated	Chr10:22294732-22297700	HCR1	H72	OK	12.8562	85.0689	3.11875	0.0023	0.034008	yes
XLOC_035644	XLOC_035644	LOC_Os04g42770	expressed protein	2.73702	Up Regulated	Chr4:25314270-25320744	HCR1	H72	OK	2.41214	16.0816	3.35302	0.0013	0.0239944	yes
XLOC_014321	XLOC_014321	LOC_Os11g33090	amidase, putative, expressed	2.7379	Up Regulated	Chr11:19572399-19576648	HCR1	H72	OK	2.34006	15.6106	3.16705	0.00265	0.0383401	yes
XLOC_021373	XLOC_021373	LOC_Os02g42850	MYB family transcription factor, putative, expressed	2.73867	Up Regulated	Chr2:25759838-25763028	HCR1	H72	OK	2.94203	19.6367	2.68379	0.00825	0.0832513	no
XLOC_048728	XLOC_048728	LOC_Os07g44410	WD40-like Beta Propeller Repeat family protein, expressed	2.73887	Up Regulated	Chr7:26542979-26545183	HCR1	H72	OK	12.4216	82.9201	3.45746	0.0004	0.0103451	yes
XLOC_022301	XLOC_022301	LOC_Os02g03750	polygalacturonase, putative, expressed	2.74064	Up Regulated	Chr2:1570081-1575018	HCR1	H72	OK	4.65364	31.1035	3.14437	0.00235	0.0346435	yes
XLOC_017060	XLOC_017060	LOC_Os12g40774	expressed protein	2.74311	Up Regulated	Chr12:25241004-25246794	HCR1	H72	OK	2.09919	14.0543	2.76188	0.00375	0.0484625	yes
XLOC_017060	XLOC_017060	LOC_Os12g40780	ankyrin repeat domain-containing protein 44, putative, expressed	2.74311	Up Regulated	Chr12:25241004-25246794	HCR1	H72	OK	2.09919	14.0543	2.76188	0.00375	0.0484625	yes
XLOC_036872	XLOC_036872	LOC_Os05g02240	ATCHX20, putative, expressed	2.74655	Up Regulated	Chr5:711548-715994	HCR1	H72	OK	3.60019	24.1613	2.85459	0.00335	0.0457396	yes
XLOC_005628	XLOC_005628	LOC_Os01g52740	expressed protein	2.74873	Up Regulated	Chr1:30340014-30341846	HCR1	H72	OK	2.52611	16.9786	2.62718	0.00795	0.0807195	no
XLOC_011983	XLOC_011983	LOC_Os11g29710	OsFBO4 - F-box and other domain containing protein, expressed	2.74886	Up Regulated	Chr11:17229937-17231917	HCR1	H72	OK	3.06006	20.5693	2.51697	0.0089	0.0884232	no
XLOC_035977	XLOC_035977	LOC_Os04g49370	expressed protein	2.75367	Up Regulated	Chr4:29465463-29467194	HCR1	H72	OK	6.70587	45.2265	3.08347	0.002	0.0302217	yes
XLOC_005403	XLOC_005403	LOC_Os01g47470	serine/threonine-protein kinase, putative, expressed	2.76381	Up Regulated	Chr1:27130540-27134194	HCR1	H72	OK	1.61584	10.9746	2.85469	0.00325	0.0453788	yes
XLOC_018547	XLOC_018547	LOC_Os12g29400	GRAM domain containing protein, expressed	2.76542	Up Regulated	Chr12:17463493-17465469	HCR1	H72	OK	13.4349	91.3501	2.84243	0.0024	0.0352751	yes
XLOC_041279	XLOC_041279	LOC_Os05g49170	cold acclimation protein WCOR413, putative, expressed	2.76999	Up Regulated	Chr5:28213807-28216045	HCR1	H72	OK	23.3825	159.493	3.56836	0.00055	0.0121349	yes
XLOC_027340	XLOC_027340	LOC_Os03g49440	phosphatase, putative, expressed	2.77867	Up Regulated	Chr3:28143096-28146332	HCR1	H72	OK	15.9087	109.169	3.50168	0.0002	0.00632877	yes
XLOC_001871	XLOC_001871	LOC_Os01g42960	TTL1, putative, expressed	2.78403	Up Regulated	Chr1:24460760-24465094	HCR1	H72	OK	3.35162	23.0851	3.3423	0.001	0.01962	yes
XLOC_038453	XLOC_038453	LOC_Os05g37970	universal stress protein domain containing protein, putative, expressed	2.79033	Up Regulated	Chr5:22276045-22279209	HCR1	H72	OK	6.19795	42.8766	3.38331	0.001	0.01962	yes
XLOC_009873	XLOC_009873	LOC_Os10g28000	glutathione reductase, putative, expressed	2.79711	Up Regulated	Chr10:14505558-14510029	HCR1	H72	OK	0.978633	6.80194	2.83962	0.0067	0.0714133	no
XLOC_039004	XLOC_039004	LOC_Os05g49430	aldose 1-epimerase, putative, expressed	2.79994	Up Regulated	Chr5:28342174-28345502	HCR1	H72	OK	7.21671	50.2578	3.31788	0.0017	0.0280055	yes
XLOC_029917	XLOC_029917	LOC_Os03g44810	expressed protein	2.80517	Up Regulated	Chr3:25268180-25273086	HCR1	H72	OK	2.79881	19.562	2.98077	0.0052	0.0619623	no
XLOC_024317	XLOC_024317	LOC_Os02g47200	transposon protein, putative, unclassified, expressed	2.81218	Up Regulated	Chr2:28812390-28814078	HCR1	H72	OK	3.39116	23.8177	2.78465	0.0069	0.0717828	no
XLOC_041826	XLOC_041826	LOC_Os06g04790	HAD superfamily phosphatase, putative, expressed	2.81815	Up Regulated	Chr6:2088473-2091021	HCR1	H72	OK	45.3378	319.749	2.99457	0.0024	0.0352751	yes
XLOC_016246	XLOC_016246	LOC_Os12g24020	rhodanese-like domain containing protein, putative, expressed	2.81861	Up Regulated	Chr12:13657098-13658780	HCR1	H72	OK	5.06864	35.7584	3.18989	0.00195	0.0302217	yes
XLOC_058922	XLOC_058922	LOC_Os09g30411	UBX domain-containing protein, putative, expressed	2.8193	Up Regulated	Chr9:18511781-18514353	HCR1	H72	OK	2.6597	18.7727	2.89672	0.00705	0.0731632	no
XLOC_046068	XLOC_046068	LOC_Os06g44160	heat shock protein DnaJ, putative, expressed	2.82391	Up Regulated	Chr6:26646323-26647896	HCR1	H72	OK	6.16439	43.6487	2.98073	0.0015	0.026417	yes
XLOC_040488	XLOC_040488	LOC_Os05g31140	glycosyl hydrolases family 17, putative, expressed	2.82578	Up Regulated	Chr5:18106223-18110987	HCR1	H72	OK	61.9319	439.096	3.23551	0.0014	0.0251041	yes
XLOC_026200	XLOC_026200	LOC_Os03g21850	nucleotidyltransferase, putative, expressed	2.82624	Up Regulated	Chr3:12492752-12500194	HCR1	H72	OK	7.38638	52.386	3.41935	0.0008	0.0166336	yes
XLOC_024777	XLOC_024777	LOC_Os02g56310	calcium-dependent protein kinase isoform AK1, putative, expressed	2.83274	Up Regulated	Chr2:34468751-34470197	HCR1	H72	OK	4.28061	30.4962	2.86824	0.0073	0.0751514	no
XLOC_021650	XLOC_021650	LOC_Os02g48480	expressed protein	2.83909	Up Regulated	Chr2:29677820-29680443	HCR1	H72	OK	27.2383	194.909	3.31404	0.0006	0.0131206	yes
XLOC_002318	XLOC_002318	LOC_Os01g52100	DUF581 domain containing protein, expressed	2.85185	Up Regulated	Chr1:29960693-29963067	HCR1	H72	OK	1.80018	12.9959	2.95897	0.0055	0.0648579	no
XLOC_021075	XLOC_021075	LOC_Os02g36070	cytochrome P450, putative, expressed	2.85676	Up Regulated	Chr2:21690377-21742030	HCR1	H72	OK	4.39144	31.8109	3.23794	0.00065	0.0139764	yes
XLOC_021075	XLOC_021075	LOC_Os02g36110	cytochrome P450, putative, expressed	2.85676	Up Regulated	Chr2:21690377-21742030	HCR1	H72	OK	4.39144	31.8109	3.23794	0.00065	0.0139764	yes
XLOC_024035	XLOC_024035	LOC_Os02g41840	DUF584 domain containing protein, putative, expressed	2.87063	Up Regulated	Chr2:25153198-25154265	HCR1	H72	OK	5.76389	42.1562	2.85965	0.00715	0.0740452	no
XLOC_051043	XLOC_051043	LOC_Os07g46820	CUG-BP- and ETR-3-like factor 5, putative, expressed	2.87105	Up Regulated	Chr7:27979894-27988000	HCR1	H72	OK	2.74287	20.0669	3.15175	0.0016	0.0270819	yes
XLOC_048587	XLOC_048587	LOC_Os07g41810	stress responsive A/B Barrel domain containing protein, expressed	2.87379	Up Regulated	Chr7:25045255-25048472	HCR1	H72	OK	12.9845	95.1749	3.40957	0.00045	0.0114285	yes
XLOC_032784	XLOC_032784	LOC_Os04g38680	transmembrane amino acid transporter protein, putative, expressed	2.88933	Up Regulated	Chr4:22977813-22980352	HCR1	H72	OK	3.61771	26.8046	3.23409	0.0016	0.0270819	yes
XLOC_003155	XLOC_003155	LOC_Os01g69870	expressed protein	2.89087	Up Regulated	Chr1:40371945-40373618	HCR1	H72	OK	18.915	140.296	3.06409	0.0026	0.0377459	yes
XLOC_029961	XLOC_029961	LOC_Os03g45720	glyoxalase family protein, putative, expressed	2.90206	Up Regulated	Chr3:25801613-25804500	HCR1	H72	OK	29.1972	218.246	3.01941	0.00135	0.0246103	yes
XLOC_028454	XLOC_028454	LOC_Os03g10820	expressed protein	2.90272	Up Regulated	Chr3:5547032-5551372	HCR1	H72	OK	3.67553	27.4868	3.48309	0.0007	0.0148253	yes
XLOC_024822	XLOC_024822	LOC_Os02g57400	2-phosphoglycerate kinase-related, putative, expressed	2.9118	Up Regulated	Chr2:35170397-35175544	HCR1	H72	OK	11.5012	86.5535	3.151	0.00195	0.0302217	yes
XLOC_021507	XLOC_021507	LOC_Os02g45600	rhoGAP domain containing protein, expressed	2.91862	Up Regulated	Chr2:27744015-27747252	HCR1	H72	OK	2.29546	17.3565	3.1852	0.00225	0.0333688	yes
XLOC_028263	XLOC_028263	LOC_Os03g06390	expressed protein	2.92817	Up Regulated	Chr3:3194832-3196705	HCR1	H72	OK	14.0497	106.939	3.11969	0.00335	0.0457396	yes
XLOC_025213	XLOC_025213	LOC_Os03g01740	expressed protein	2.92839	Up Regulated	Chr3:470267-471096	HCR1	H72	OK	6.44201	49.0403	2.91752	0.0056	0.0651322	no
XLOC_015733	XLOC_015733	LOC_Os12g12370	outer envelope protein, putative, expressed	2.93653	Up Regulated	Chr12:6811122-6820427	HCR1	H72	OK	13.6638	104.606	2.80884	0.00495	0.0592698	no
XLOC_032497	XLOC_032497	LOC_Os04g32030	heavy metal-associated domain containing protein, expressed	2.93827	Up Regulated	Chr4:19188986-19192392	HCR1	H72	OK	35.3412	270.887	3.01154	0.00545	0.0643709	no
XLOC_049029	XLOC_049029	LOC_Os07g01560	transporter family protein, putative, expressed	2.93884	Up Regulated	Chr7:343925-353686	HCR1	H72	OK	18.3411	140.638	2.74469	0.00385	0.0484625	yes
XLOC_020613	XLOC_020613	LOC_Os02g25860	glutelin, putative, expressed	2.94053	Up Regulated	Chr2:15151363-15153319	HCR1	H72	OK	2.99652	23.0041	2.57308	0.0067	0.0714133	no
XLOC_021811	XLOC_021811	LOC_Os02g51550	DUF581 domain containing protein, expressed	2.94784	Up Regulated	Chr2:31575807-31577576	HCR1	H72	OK	4.07927	31.4754	3.01215	0.00295	0.0419623	yes
XLOC_017128	XLOC_017128	LOC_Os12g42280	9-cis-epoxycarotenoid dioxygenase 1, chloroplast precursor, putative, expressed	2.95236	Up Regulated	Chr12:26268229-26270794	HCR1	H72	OK	2.52983	19.5812	2.97959	0.00665	0.0714133	no
XLOC_043116	XLOC_043116	LOC_Os06g33330	powdery mildew resistant protein 5, putative, expressed	2.95561	Up Regulated	Chr6:19412328-19418493	HCR1	H72	OK	5.22344	40.5212	3.26821	5e-05	0.00181962	yes
XLOC_000654	XLOC_000654	LOC_Os01g15000	lipase, putative, expressed	2.95855	Up Regulated	Chr1:8404246-8408377	HCR1	H72	OK	9.07804	70.5673	3.52137	0.0005	0.0117595	yes
XLOC_058961	XLOC_058961	LOC_Os09g31478	auxin efflux carrier component, putative, expressed	2.95916	Up Regulated	Chr9:18978121-18983481	HCR1	H72	OK	6.89429	53.6149	3.552	0.00075	0.0157266	yes
XLOC_010519	XLOC_010519	LOC_Os10g42610	expressed protein	2.96178	Up Regulated	Chr10:22964025-22965622	HCR1	H72	OK	12.343	96.1625	3.4311	0.00095	0.0188263	yes
XLOC_004111	XLOC_004111	LOC_Os01g16040	mitochondrial carrier protein, putative, expressed	2.96407	Up Regulated	Chr1:9024896-9028895	HCR1	H72	OK	16.1449	125.982	3.62182	0.0005	0.0117595	yes
XLOC_056497	XLOC_056497	LOC_Os09g15670	protein phosphatase 2C, putative, expressed	2.96822	Up Regulated	Chr9:9567470-9568905	HCR1	H72	OK	10.2806	80.4528	3.07508	0.00065	0.0139764	yes
XLOC_000432	XLOC_000432	LOC_Os01g10070	expressed protein	2.97498	Up Regulated	Chr1:5256286-5262898	HCR1	H72	OK	7.3762	57.9952	3.48564	5e-05	0.00181962	yes
XLOC_000432	XLOC_000432	LOC_Os01g10080	expressed protein	2.97498	Up Regulated	Chr1:5256286-5262898	HCR1	H72	OK	7.3762	57.9952	3.48564	5e-05	0.00181962	yes
XLOC_018772	XLOC_018772	LOC_Os12g34096	expressed protein	2.97565	Up Regulated	Chr12:20627180-20631072	HCR1	H72	OK	0.475682	3.74177	2.72733	0.00335	0.0457396	yes
XLOC_028921	XLOC_028921	LOC_Os03g21060	No apical meristem protein, putative, expressed	2.97686	Up Regulated	Chr3:11973969-11976426	HCR1	H72	OK	6.95696	54.7701	3.44947	0.00095	0.0188263	yes
XLOC_024503	XLOC_024503	LOC_Os02g50820	nucleobase-ascorbate transporter, putative, expressed	2.98593	Up Regulated	Chr2:31046035-31051816	HCR1	H72	OK	3.03367	24.0339	3.65251	0.0006	0.0131206	yes
XLOC_002842	XLOC_002842	LOC_Os01g62610	peptidyl-prolyl cis-trans isomerase, FKBP-type, putative, expressed	2.98816	Up Regulated	Chr1:36253546-36257218	HCR1	H72	OK	7.10428	56.3697	3.72685	0.00015	0.00498098	yes
XLOC_024258	XLOC_024258	LOC_Os02g45930	expressed protein	2.9883	Up Regulated	Chr2:27989365-27990587	HCR1	H72	OK	12.5394	99.5053	3.48459	0.00035	0.00933765	yes
XLOC_005756	XLOC_005756	LOC_Os01g55540	aminotransferase, classes I and II, domain containing protein, expressed	2.99061	Up Regulated	Chr1:31998650-32003690	HCR1	H72	OK	43.8548	348.562	3.11276	0.0023	0.034008	yes
XLOC_043995	XLOC_043995	LOC_Os06g51060	CHIT8 - Chitinase family protein precursor, expressed	2.99439	Up Regulated	Chr6:30890710-30892066	HCR1	H72	OK	22.5871	179.995	3.44417	0.0005	0.0117595	yes
XLOC_038973	XLOC_038973	LOC_Os05g48930	OsGrx_S2 - glutaredoxin subgroup III, expressed	2.99887	Up Regulated	Chr5:28067837-28068782	HCR1	H72	OK	3.48509	27.8589	2.73372	0.00365	0.0474693	yes
XLOC_038554	XLOC_038554	LOC_Os05g40010	LTPL17 - Protease inhibitor/seed storage/LTP family protein precursor, expressed	3.00013	Up Regulated	Chr5:23507828-23509669	HCR1	H72	OK	25.9313	207.469	3.07071	0.00385	0.0484625	yes
XLOC_028744	XLOC_028744	LOC_Os03g16960	cysteine-rich repeat secretory protein 55 precursor, putative, expressed	3.00226	Up Regulated	Chr3:9425489-9426843	HCR1	H72	OK	2.37422	19.0236	2.81436	0.0055	0.0648579	no
XLOC_022519	XLOC_022519	LOC_Os02g08330	gp176, putative, expressed	3.01902	Up Regulated	Chr2:4424438-4426620	HCR1	H72	OK	2.86582	23.2309	2.95919	0.005	0.0597959	no
XLOC_001898	XLOC_001898	LOC_Os01g43480	AAA-type ATPase family protein, putative, expressed	3.01987	Up Regulated	Chr1:24894537-24901813	HCR1	H72	OK	3.77878	30.6494	3.61984	5e-05	0.00181962	yes
XLOC_016791	XLOC_016791	LOC_Os12g35610	respiratory burst oxidase, putative, expressed	3.02044	Up Regulated	Chr12:21648122-21653570	HCR1	H72	OK	0.834396	6.7704	2.71057	0.0084	0.0844194	no
XLOC_006071	XLOC_006071	LOC_Os01g62360	expressed protein	3.02524	Up Regulated	Chr1:36089000-36091930	HCR1	H72	OK	3.33202	27.1267	3.03578	0.00815	0.0824954	no
XLOC_003223	XLOC_003223	LOC_Os01g71350	glycosyl hydrolases family 17, putative, expressed	3.02661	Up Regulated	Chr1:41349730-41352839	HCR1	H72	OK	5.92969	48.3205	2.98806	0.0025	0.0365272	yes
XLOC_044182	XLOC_044182	LOC_Os06g04380	aminomethyltransferase, putative, expressed	3.0307	Up Regulated	Chr6:1872633-1875931	HCR1	H72	OK	6.30884	51.5563	3.55976	0.0007	0.0148253	yes
XLOC_013476	XLOC_013476	LOC_Os11g13570	gibberellin receptor GID1L2, putative, expressed	3.03121	Up Regulated	Chr11:7437634-7439156	HCR1	H72	OK	7.60943	62.2066	3.13008	0.0015	0.026417	yes
XLOC_046204	XLOC_046204	LOC_Os06g46740	early nodulin 20 precursor, putative, expressed	3.03691	Up Regulated	Chr6:28388295-28389574	HCR1	H72	OK	9.96374	81.7754	3.34642	0.0011	0.0212578	yes
XLOC_039109	XLOC_039109	LOC_Os05g51670	NAD dependent epimerase/dehydratase family protein, putative, expressed	3.04421	Up Regulated	Chr5:29631972-29638282	HCR1	H72	OK	19.895	164.113	2.66393	0.0071	0.0736563	no
XLOC_043660	XLOC_043660	LOC_Os06g44310	tetraspanin family protein, putative, expressed	3.05204	Up Regulated	Chr6:26752550-26755222	HCR1	H72	OK	6.08268	50.4489	3.47315	0.00135	0.0246103	yes
XLOC_025317	XLOC_025317	LOC_Os03g03660	CAMK_CAMK_like.17 - CAMK includes calcium/calmodulin depedent protein kinases, expressed	3.06509	Up Regulated	Chr3:1623915-1629530	HCR1	H72	OK	18.9059	158.227	3.8613	0.0003	0.00845343	yes
XLOC_005627	XLOC_005627	LOC_Os01g52730	DUF584 domain containing protein, putative, expressed	3.06664	Up Regulated	Chr1:30320745-30325085	HCR1	H72	OK	1.49552	12.5297	2.87489	0.00855	0.0855202	no
XLOC_042117	XLOC_042117	LOC_Os06g10530	expressed protein	3.06863	Up Regulated	Chr6:5431525-5432214	HCR1	H72	OK	12.431	104.293	2.91061	0.00425	0.0521762	no
XLOC_056880	XLOC_056880	LOC_Os09g24850	retrotransposon protein, putative, unclassified, expressed	3.0719	Up Regulated	Chr9:14832739-14839543	HCR1	H72	OK	1.42096	11.9486	3.33141	0.0004	0.0103451	yes
XLOC_001722	XLOC_001722	LOC_Os01g40070	expressed protein	3.07474	Up Regulated	Chr1:22604518-22606808	HCR1	H72	OK	8.47421	71.3984	3.72333	0.0002	0.00632877	yes
XLOC_040813	XLOC_040813	LOC_Os05g38264	expressed protein	3.08078	Up Regulated	Chr5:22436429-22437469	HCR1	H72	OK	5.33611	45.1474	3.48241	0.00085	0.0171782	yes
XLOC_034806	XLOC_034806	LOC_Os04g23580	xylosyltransferase, putative, expressed	3.09283	Up Regulated	Chr4:13493118-13498065	HCR1	H72	OK	2.15266	18.3658	3.31436	0.00175	0.028622	yes
XLOC_058827	XLOC_058827	LOC_Os09g28180	D-mannose binding lectin family protein, expressed	3.09505	Up Regulated	Chr9:17091950-17096006	HCR1	H72	OK	0.670814	5.73198	2.99818	0.00215	0.0321111	yes
XLOC_033375	XLOC_033375	LOC_Os04g52180	expressed protein	3.09619	Up Regulated	Chr4:31000117-31001986	HCR1	H72	OK	61.4898	525.834	3.05017	0.00855	0.0855202	no
XLOC_023048	XLOC_023048	LOC_Os02g20360	tyrosine aminotransferase, putative, expressed	3.10609	Up Regulated	Chr2:11997093-12002633	HCR1	H72	OK	7.64483	65.8255	3.7114	5e-05	0.00181962	yes
XLOC_053219	XLOC_053219	LOC_Os08g39370	citrate transporter, putative, expressed	3.11275	Up Regulated	Chr8:24882924-24886350	HCR1	H72	OK	16.315	141.13	3.83918	0.0003	0.00845343	yes
XLOC_028810	XLOC_028810	LOC_Os03g18454	gamma-interferon-inducible lysosomal thiol reductase precursor, putative, expressed	3.11585	Up Regulated	Chr3:10344943-10359349	HCR1	H72	OK	26.4393	229.2	3.142	0.003	0.0425304	yes
XLOC_053410	XLOC_053410	LOC_Os08g43480	zinc finger, C3HC4 type family protein, expressed	3.11689	Up Regulated	Chr8:27502026-27504972	HCR1	H72	OK	9.51034	82.5035	4.03916	5e-05	0.00181962	yes
XLOC_023763	XLOC_023763	LOC_Os02g36190	cytochrome P450, putative, expressed	3.12419	Up Regulated	Chr2:21810333-21813460	HCR1	H72	OK	2.2019	19.1988	3.3463	0.00205	0.0308511	yes
XLOC_053246	XLOC_053246	LOC_Os08g39830	ethylene-insensitive 3, putative, expressed	3.1253	Up Regulated	Chr8:25211492-25214797	HCR1	H72	OK	3.07341	26.8181	3.78506	0.0005	0.0117595	yes
XLOC_028587	XLOC_028587	LOC_Os03g13730	translocase of chloroplast 34, putative, expressed	3.12746	Up Regulated	Chr3:7434038-7438082	HCR1	H72	OK	25.399	221.96	3.74582	0.00025	0.00733805	yes
XLOC_014218	XLOC_014218	LOC_Os11g31190	nodulin MtN3 family protein, putative, expressed	3.13902	Up Regulated	Chr11:18171677-18174478	HCR1	H72	OK	8.19366	72.18	3.75139	0.0005	0.0117595	yes
XLOC_021260	XLOC_021260	LOC_Os02g39880	expressed protein	3.13921	Up Regulated	Chr2:24095853-24097712	HCR1	H72	OK	7.65282	67.4246	3.17944	0.00365	0.0474693	yes
XLOC_055319	XLOC_055319	LOC_Os08g39270	fasciclin domain containing protein, expressed	3.14141	Up Regulated	Chr8:24818307-24820452	HCR1	H72	OK	3.08261	27.2006	2.94255	0.00225	0.0333688	yes
XLOC_051751	XLOC_051751	LOC_Os08g09230	starch synthase III, putative, expressed	3.14397	Up Regulated	Chr8:5350013-5363367	HCR1	H72	OK	7.91375	69.954	3.37008	0.00205	0.0308511	yes
XLOC_025922	XLOC_025922	LOC_Os03g16440	outer membrane protein, OMP85 family, putative, expressed	3.15356	Up Regulated	Chr3:9068338-9074062	HCR1	H72	OK	24.1794	215.16	2.68404	0.0046	0.0556419	no
XLOC_050874	XLOC_050874	LOC_Os07g42910	cytochrome c oxidase subunit, putative, expressed	3.1635	Up Regulated	Chr7:25691833-25694745	HCR1	H72	OK	2.46628	22.098	3.1712	0.00205	0.0308511	yes
XLOC_042637	XLOC_042637	LOC_Os06g22080	diacylglycerol O-acyltransferase, putative, expressed	3.17365	Up Regulated	Chr6:12809464-12812495	HCR1	H72	OK	17.2342	155.509	3.83349	0.00025	0.00733805	yes
XLOC_024356	XLOC_024356	LOC_Os02g47840	universal stress protein domain containing protein, putative, expressed	3.18537	Up Regulated	Chr2:29257651-29265497	HCR1	H72	OK	9.48601	86.2929	3.20573	0.0023	0.034008	yes
XLOC_041319	XLOC_041319	LOC_Os05g50110	oleosin, putative, expressed	3.1877	Up Regulated	Chr5:28716487-28717779	HCR1	H72	OK	9.23985	84.1894	3.30431	0.00045	0.0114285	yes
XLOC_035053	XLOC_035053	LOC_Os04g28820	retrotransposon protein, putative, unclassified, expressed	3.19598	Up Regulated	Chr4:17063616-17073889	HCR1	H72	OK	1.28642	11.7888	3.90589	0.0004	0.0103451	yes
XLOC_041301	XLOC_041301	LOC_Os05g49730	protein phosphatase 2C, putative, expressed	3.21129	Up Regulated	Chr5:28523661-28526025	HCR1	H72	OK	3.17247	29.3828	3.07242	0.0035	0.0457396	yes
XLOC_050791	XLOC_050791	LOC_Os07g40860	retrotransposon protein, putative, unclassified, expressed	3.21304	Up Regulated	Chr7:24472434-24473579	HCR1	H72	OK	26.7368	247.93	2.96179	0.0092	0.0908546	no
XLOC_038101	XLOC_038101	LOC_Os05g30350	Os5bglu22 - beta-glucosidase homologue, similar to G. max isohydroxyurate hydrolase, expressed	3.21766	Up Regulated	Chr5:17594908-17600513	HCR1	H72	OK	4.13933	38.5071	4.0637	0.00015	0.00498098	yes
XLOC_035670	XLOC_035670	LOC_Os04g43200	caleosin related protein, putative, expressed	3.2352	Up Regulated	Chr4:25563392-25565204	HCR1	H72	OK	26.7362	251.762	3.74594	0.0003	0.00845343	yes
XLOC_041044	XLOC_041044	LOC_Os05g43390	signal recognition particle 54 kDa protein, putative, expressed	3.26084	Up Regulated	Chr5:25229674-25233349	HCR1	H72	OK	1.55292	14.8853	3.62904	0.0005	0.0117595	yes
XLOC_010469	XLOC_010469	LOC_Os10g41550	beta-amylase, putative, expressed	3.26158	Up Regulated	Chr10:22324197-22327665	HCR1	H72	OK	18.5049	177.468	4.01412	0.0002	0.00632877	yes
XLOC_028078	XLOC_028078	LOC_Os03g02070	heavy-metal-associated domain-containing protein, putative, expressed	3.28393	Up Regulated	Chr3:656449-657834	HCR1	H72	OK	3.64435	35.4961	3.16114	0.0064	0.0709201	no
XLOC_020875	XLOC_020875	LOC_Os02g31030	glycerophosphoryl diester phosphodiesterase family protein, putative, expressed	3.28689	Up Regulated	Chr2:18537040-18540912	HCR1	H72	OK	7.05123	68.8206	3.81406	0.00045	0.0114285	yes
XLOC_024757	XLOC_024757	LOC_Os02g55890	inorganic H+ pyrophosphatase, putative, expressed	3.29016	Up Regulated	Chr2:34210399-34215008	HCR1	H72	OK	2.94899	28.8477	4.00986	0.0001	0.00345643	yes
XLOC_034327	XLOC_034327	LOC_Os04g13210	multidrug resistance-associated protein, putative, expressed	3.29396	Up Regulated	Chr4:7301572-7313262	HCR1	H72	OK	0.884329	8.67354	3.51428	0.00135	0.0246103	yes
XLOC_016855	XLOC_016855	LOC_Os12g36880	pathogenesis-related Bet v I family protein, putative, expressed	3.30196	Up Regulated	Chr12:22599951-22602386	HCR1	H72	OK	79.15	780.622	3.79201	0.0011	0.0212578	yes
XLOC_030101	XLOC_030101	LOC_Os03g48610	galactosyltransferase family protein, putative, expressed	3.30873	Up Regulated	Chr3:27715327-27720176	HCR1	H72	OK	1.03826	10.288	3.12337	0.0082	0.0828881	no
XLOC_028781	XLOC_028781	LOC_Os03g17790	OsRCI2-5 - Putative low temperature and salt responsive protein, expressed	3.31086	Up Regulated	Chr3:9899757-9900400	HCR1	H72	OK	23.1216	229.448	3.78014	0.0004	0.0103451	yes
XLOC_008616	XLOC_008616	LOC_Os10g40260	expressed protein	3.31345	Up Regulated	Chr10:21565414-21580696	HCR1	H72	OK	2.37306	23.5916	2.89795	0.00285	0.0408541	yes
XLOC_052488	XLOC_052488	LOC_Os08g24750	xyloglucan fucosyltransferase, putative, expressed	3.32143	Up Regulated	Chr8:14976006-14978065	HCR1	H72	OK	0.61688	6.16665	2.65764	0.00855	0.0855202	no
XLOC_001979	XLOC_001979	LOC_Os01g45460	serine esterase, putative, expressed	3.33637	Up Regulated	Chr1:25792698-25800477	HCR1	H72	OK	1.92202	19.4135	3.43309	0.0011	0.0212578	yes
XLOC_022555	XLOC_022555	LOC_Os02g09630	GA20292-PA, putative, expressed	3.34241	Up Regulated	Chr2:4949531-4952483	HCR1	H72	OK	5.33526	54.1153	3.45682	0.0005	0.0117595	yes
XLOC_055393	XLOC_055393	LOC_Os08g40680	glycosyl hydrolase, putative, expressed	3.34287	Up Regulated	Chr8:25758850-25759949	HCR1	H72	OK	11.1183	112.809	3.48588	0.00065	0.0139764	yes
XLOC_028975	XLOC_028975	LOC_Os03g22120	sucrose synthase, putative, expressed	3.34492	Up Regulated	Chr3:12674461-12680657	HCR1	H72	OK	35.9945	365.727	3.12904	0.00395	0.0490427	yes
XLOC_038628	XLOC_038628	LOC_Os05g41620	expressed protein	3.35151	Up Regulated	Chr5:24374952-24377903	HCR1	H72	OK	4.48874	45.8174	3.49375	0.0023	0.034008	yes
XLOC_025599	XLOC_025599	LOC_Os03g09880	AIR12, putative, expressed	3.35564	Up Regulated	Chr3:4913121-4914145	HCR1	H72	OK	1.56878	16.0587	2.76534	0.0089	0.0884232	no
XLOC_020107	XLOC_020107	LOC_Os02g14720	expressed protein	3.36669	Up Regulated	Chr2:8114875-8121925	HCR1	H72	OK	4.72016	48.6889	4.13989	0.0001	0.00345643	yes
XLOC_042123	XLOC_042123	LOC_Os06g10650	tyrosine phosphatase family protein, putative, expressed	3.36812	Up Regulated	Chr6:5555006-5559140	HCR1	H72	OK	13.4823	139.21	4.15548	5e-05	0.00181962	yes
XLOC_040332	XLOC_040332	LOC_Os05g27580	wound-induced protein WI12, putative, expressed	3.3854	Up Regulated	Chr5:16047149-16050791	HCR1	H72	OK	1.66973	17.4483	2.55313	0.00945	0.0927661	no
XLOC_025607	XLOC_025607	LOC_Os03g10100	transporter family protein, putative, expressed	3.38964	Up Regulated	Chr3:5112101-5114453	HCR1	H72	OK	1.52194	15.9508	3.32057	0.001	0.01962	yes
XLOC_014737	XLOC_014737	LOC_Os11g42410	expressed protein	3.39011	Up Regulated	Chr11:25522646-25526265	HCR1	H72	OK	1.90059	19.9257	2.97327	0.00915	0.0904514	no
XLOC_036009	XLOC_036009	LOC_Os04g49920	sensitivity to red light reduced protein 1, putative, expressed	3.39494	Up Regulated	Chr4:29769921-29783593	HCR1	H72	OK	0.149981	1.57766	2.21527	0.00595	0.066784	no
XLOC_036009	XLOC_036009	LOC_Os04g49930	sensitivity to red light reduced protein 1, putative, expressed	3.39494	Up Regulated	Chr4:29769921-29783593	HCR1	H72	OK	0.149981	1.57766	2.21527	0.00595	0.066784	no
XLOC_043277	XLOC_043277	LOC_Os06g37010	metal cation transporter, putative, expressed	3.40509	Up Regulated	Chr6:21824098-21826735	HCR1	H72	OK	2.36328	25.0351	3.35272	0.00375	0.0484625	yes
XLOC_023728	XLOC_023728	LOC_Os02g35490	MLO domain containing protein, putative, expressed	3.41359	Up Regulated	Chr2:21330404-21335625	HCR1	H72	OK	0.498465	5.31164	3.06787	0.00765	0.0782644	no
XLOC_023562	XLOC_023562	LOC_Os02g32140	AP2 domain containing protein, expressed	3.41993	Up Regulated	Chr2:18986677-18988855	HCR1	H72	OK	1.11153	11.8966	2.68472	0.0083	0.0835563	no
XLOC_050828	XLOC_050828	LOC_Os07g41650	pectinesterase, putative, expressed	3.42094	Up Regulated	Chr7:24960950-24964414	HCR1	H72	OK	4.4935	48.1273	3.76584	0.0012	0.0225999	yes
XLOC_008185	XLOC_008185	LOC_Os10g30944	expressed protein	3.4224	Up Regulated	Chr10:16139812-16151105	HCR1	H72	OK	2.96471	31.7854	3.60685	0.00125	0.0232019	yes
XLOC_041254	XLOC_041254	LOC_Os05g48650	transcription factor HBP-1b, putative, expressed	3.42653	Up Regulated	Chr5:27883502-27884410	HCR1	H72	OK	7.86252	84.5376	3.26346	0.00235	0.0346435	yes
XLOC_042960	XLOC_042960	LOC_Os06g29844	MATE efflux family protein, putative, expressed	3.44718	Up Regulated	Chr6:17194073-17248112	HCR1	H72	OK	1.80727	19.7119	1.72764	0.0047	0.0567124	no
XLOC_042960	XLOC_042960	LOC_Os06g29900	integral membrane protein, putative, expressed	3.44718	Up Regulated	Chr6:17194073-17248112	HCR1	H72	OK	1.80727	19.7119	1.72764	0.0047	0.0567124	no
XLOC_042960	XLOC_042960	LOC_Os06g29950	MATE domain containing protein, expressed	3.44718	Up Regulated	Chr6:17194073-17248112	HCR1	H72	OK	1.80727	19.7119	1.72764	0.0047	0.0567124	no
XLOC_062538	XLOC_062538	LOC_Os09g29130	ZF-HD protein dimerisation region containing protein, expressed	3.45281	Up Regulated	Chr9:17703753-17705611	HCR1	H72	OK	1.01135	11.0739	2.987	0.00925	0.0911962	no
XLOC_039080	XLOC_039080	LOC_Os05g50920	transmembrane amino acid transporter protein, putative, expressed	3.45883	Up Regulated	Chr5:29221403-29224479	HCR1	H72	OK	0.870607	9.57265	2.84278	0.00755	0.0774556	no
XLOC_037255	XLOC_037255	LOC_Os05g10650	6-phosphofructokinase, putative, expressed	3.46286	Up Regulated	Chr5:5813264-5815545	HCR1	H72	OK	0.554934	6.11881	2.71434	0.00795	0.0807195	no
XLOC_025895	XLOC_025895	LOC_Os03g15840	glycosyl transferase, group 1 domain containing protein, expressed	3.46603	Up Regulated	Chr3:8737119-8741197	HCR1	H72	OK	8.10819	89.5988	3.91189	0.00165	0.0272577	yes
XLOC_027290	XLOC_027290	LOC_Os03g48310	plasma membrane ATPase, putative, expressed	3.47106	Up Regulated	Chr3:27510163-27517321	HCR1	H72	OK	4.64602	51.5197	4.15826	0.0001	0.00345643	yes
XLOC_019711	XLOC_019711	LOC_Os02g05830	ribulose bisphosphate carboxylase small chain, chloroplast precursor, putative, expressed	3.4846	Up Regulated	Chr2:2874933-2876452	HCR1	H72	OK	7.27534	81.4374	4.23777	0.0002	0.00632877	yes
XLOC_019617	XLOC_019617	LOC_Os02g04330	5-AMP-activated protein kinase beta-1 subunit-related, putative, expressed	3.48579	Up Regulated	Chr2:1908972-1912809	HCR1	H72	OK	3.749	41.9994	4.04509	0.00025	0.00733805	yes
XLOC_006215	XLOC_006215	LOC_Os01g65510	OsFBX31 - F-box domain containing protein, expressed	3.48635	Up Regulated	Chr1:38022746-38026073	HCR1	H72	OK	2.8612	32.066	3.59001	0.00155	0.0264627	yes
XLOC_007949	XLOC_007949	LOC_Os10g25130	aminotransferase, classes I and II, domain containing protein, expressed	3.50095	Up Regulated	Chr10:12967816-12974250	HCR1	H72	OK	13.1927	149.357	3.0226	0.0035	0.0457396	yes
XLOC_005056	XLOC_005056	LOC_Os01g39136	retrotransposon protein, putative, unclassified, expressed	3.50631	Up Regulated	Chr1:22031158-22034257	HCR1	H72	OK	2.05622	23.3655	3.51769	0.0015	0.026417	yes
XLOC_050632	XLOC_050632	LOC_Os07g37620	fiber expressed protein, putative, expressed	3.50988	Up Regulated	Chr7:22543275-22544955	HCR1	H72	OK	2.38207	27.1353	3.69872	0.00125	0.0232019	yes
XLOC_002899	XLOC_002899	LOC_Os01g63810	starch binding domain containing protein, putative, expressed	3.50997	Up Regulated	Chr1:37021393-37031680	HCR1	H72	OK	3.37991	38.5045	2.33938	0.00915	0.0904514	no
XLOC_015436	XLOC_015436	LOC_Os12g06180	HVA22, putative, expressed	3.52714	Up Regulated	Chr12:2927796-2935694	HCR1	H72	OK	2.79297	32.1988	3.38305	0.0057	0.0651322	no
XLOC_050831	XLOC_050831	LOC_Os07g41720	nuclear transcription factor Y subunit, putative, expressed	3.53101	Up Regulated	Chr7:24996723-25003400	HCR1	H72	OK	4.46252	51.5846	4.28839	0.00025	0.00733805	yes
XLOC_003702	XLOC_003702	LOC_Os01g07530	uncharacterized glycosyltransferase, putative, expressed	3.54062	Up Regulated	Chr1:3598417-3602211	HCR1	H72	OK	2.99109	34.8065	3.74151	0.0004	0.0103451	yes
XLOC_024322	XLOC_024322	LOC_Os02g47280	growth-regulating factor, putative, expressed	3.54247	Up Regulated	Chr2:28863172-28866997	HCR1	H72	OK	0.560356	6.52908	2.8592	0.00675	0.0714133	no
XLOC_047268	XLOC_047268	LOC_Os07g13634	cytokinin-N-glucosyltransferase 1, putative, expressed	3.54693	Up Regulated	Chr7:7815441-7832311	HCR1	H72	OK	2.31005	26.9993	3.48099	0.00155	0.0264627	yes
XLOC_040847	XLOC_040847	LOC_Os05g38860	expressed protein	3.55109	Up Regulated	Chr5:22799955-22800977	HCR1	H72	OK	1.24295	14.5693	2.74624	0.0069	0.0717828	no
XLOC_025960	XLOC_025960	LOC_Os03g17200	plant-specific domain TIGR01589 family protein, expressed	3.55209	Up Regulated	Chr3:9574985-9579071	HCR1	H72	OK	5.37922	63.0963	1.01582	0.0098	0.0945087	no
XLOC_026224	XLOC_026224	LOC_Os03g22360	expressed protein	3.5592	Up Regulated	Chr3:12809282-12809915	HCR1	H72	OK	3.09553	36.489	2.85042	0.0067	0.0714133	no
XLOC_018717	XLOC_018717	LOC_Os12g32970	membrane associated DUF588 domain containing protein, putative, expressed	3.57108	Up Regulated	Chr12:19910582-19911477	HCR1	H72	OK	2.3536	27.9727	2.79537	0.00795	0.0807195	no
XLOC_005379	XLOC_005379	LOC_Os01g46950	aldose 1-epimerase, putative, expressed	3.5758	Up Regulated	Chr1:26791748-26796214	HCR1	H72	OK	1.781	21.2367	3.6041	0.0016	0.0270819	yes
XLOC_038590	XLOC_038590	LOC_Os05g40790	CCR4-NOT transcription factor, putative, expressed	3.57797	Up Regulated	Chr5:23913032-23923564	HCR1	H72	OK	0.906435	10.8246	3.09621	0.00045	0.0114285	yes
XLOC_032129	XLOC_032129	LOC_Os04g24430	sucrose synthase, putative, expressed	3.58387	Up Regulated	Chr4:14008244-14013440	HCR1	H72	OK	0.23322	2.79652	3.01895	0.00855	0.0855202	no
XLOC_045831	XLOC_045831	LOC_Os06g39240	endothelial differentiation-related factor 1, putative, expressed	3.58402	Up Regulated	Chr6:23293233-23294078	HCR1	H72	OK	3.35821	40.2722	3.07349	0.00375	0.0484625	yes
XLOC_000876	XLOC_000876	LOC_Os01g20780	anther-specific protein SF18 precursor, putative, expressed	3.58759	Up Regulated	Chr1:11585606-11586525	HCR1	H72	OK	2.64797	31.8334	3.22111	0.0076	0.0778336	no
XLOC_048961	XLOC_048961	LOC_Os07g48730	tyrosine protein kinase domain containing protein, putative, expressed	3.59364	Up Regulated	Chr7:29179660-29181610	HCR1	H72	OK	0.837147	10.1063	3.01619	0.005	0.0597959	no
XLOC_044291	XLOC_044291	LOC_Os06g06560	starch synthase, putative, expressed	3.60522	Up Regulated	Chr6:3079058-3086808	HCR1	H72	OK	12.4894	151.992	4.04491	0.00075	0.0157266	yes
XLOC_053572	XLOC_053572	LOC_Os08g02230	FAD-binding and arabino-lactone oxidase domains containing protein, putative, expressed	3.6096	Up Regulated	Chr8:767545-770948	HCR1	H72	OK	1.82126	22.2314	3.94768	0.0005	0.0117595	yes
XLOC_034906	XLOC_034906	LOC_Os04g25650	cysteine-rich receptor-like protein kinase, putative, expressed	3.6159	Up Regulated	Chr4:14863452-14864827	HCR1	H72	OK	1.04032	12.7544	2.69637	0.0075	0.076996	no
XLOC_020372	XLOC_020372	LOC_Os02g19970	aminotransferase, classes I and II, domain containing protein, expressed	3.61707	Up Regulated	Chr2:11749119-11753786	HCR1	H72	OK	0.489252	6.00315	3.02398	0.0042	0.0517773	no
XLOC_053678	XLOC_053678	LOC_Os08g04430	expressed protein	3.61777	Up Regulated	Chr8:2170397-2171348	HCR1	H72	OK	14.8154	181.874	3.38312	0.00065	0.0139764	yes
XLOC_001917	XLOC_001917	LOC_Os01g43851	cytochrome P450 72A1, putative, expressed	3.62617	Up Regulated	Chr1:25119733-25121927	HCR1	H72	OK	1.15987	14.3216	3.61791	0.0006	0.0131206	yes
XLOC_039138	XLOC_039138	LOC_Os05g01210	expressed protein	3.63786	Up Regulated	Chr5:149713-152166	HCR1	H72	OK	7.36367	91.6643	4.02059	0.0003	0.00845343	yes
XLOC_017435	XLOC_017435	LOC_Os12g05180	avr9/Cf-9 rapidly elicited protein, putative, expressed	3.6527	Up Regulated	Chr12:2288573-2290544	HCR1	H72	OK	1.22135	15.3607	3.16229	0.0096	0.0928523	no
XLOC_000019	XLOC_000019	LOC_Os01g01290	histone-like transcription factor and archaeal histone, putative, expressed	3.65299	Up Regulated	Chr1:137862-144666	HCR1	H72	OK	3.22105	40.5188	3.91836	0.00015	0.00498098	yes
XLOC_000019	XLOC_000019	LOC_Os01g01295	expressed protein	3.65299	Up Regulated	Chr1:137862-144666	HCR1	H72	OK	3.22105	40.5188	3.91836	0.00015	0.00498098	yes
[truncated: 1,306 more rows]

## Sheet: HCvs96
test_id	gene_id	gene	Annotation	log2(fold_change)	Regulation	locus	sample_1	sample_2	status	value_1	value_2	test_stat	p_value	q_value	significant
[truncated: 2,094 more rows]

[truncated: 6 more sheets: TCvs48, TCvs72, TCvs96, TCvsHC, HP2216.ALL, TETEP.ALL]
